# Supplementary material for: New Insights into Radio-Resistance Mechanism Revealed by (Phospho)Proteome Analysis of Deinococcus Radiodurans after Heavy Ion Irradiation
Source: Int J Mol Sci. 2023 Oct 1;24(19):14817. doi: 10.3390/ijms241914817 (PMC10572868; doi:10.3390/ijms241914817)
Supplement: Supplementary file 1 [file ijms-24-14817-s001.zip › Supplementary Tables.xlsx]

## Sheet: Table S1A
Table S1A Proteome identification and differential expression in D. radiodurans.
Uniprot ID	Gene name	0Gy-0h-repeat1	0Gy-0h-repeat2	20Gy-0h-repeat1	20Gy-0h-repeat2	80Gy-0h-repeat1	80Gy-0h-repeat2	160Gy-0h-repeat1	160Gy-0h-repeat2	0Gy-2h-repeat1	0Gy-2h-repeat2	20Gy-2h-repeat1	20Gy-2h-repeat2	80Gy-2h-repeat1	80Gy-2h-repeat2	160Gy-2h-repeat1	160Gy-2h-repeat2	log2FC-20Gy-0Gy-0h	log2FC-80Gy-0Gy-0h	log2FC-160Gy-0Gy-0h	log2FC-20Gy-0Gy-2h	log2FC-80Gy-0Gy-2h	log2FC-160Gy-0Gy-2h	Trend-20Gy-0Gy-0h	Trend-80Gy-0Gy-0h	Trend-160Gy-0Gy-0h	Trend-20Gy-0Gy-2h	Trend-80Gy-0Gy-2h	Trend-160Gy-0Gy-2h	FDR	Early_up_count	Late_up_count	Stage_up
A0A075IPU7	perR	0.00277077	NULL	NULL	NULL	0.0380638	0.0254953	NULL	NULL	NULL	NULL	NULL	NULL	NULL	0.031228	0.0321025	0.0190773	-1.42118	4.22159	-1.42118	0	4.6466	5.33025	down	up	down	no change	up	up	0.000413506	1	2	NULL
I3NX86	DR_2036	6.24157	6.87419	3.6651	5.15576	2.30586	2.37288	6.29261	6.94201	4.70208	4.08371	3.02149	2.80288	2.86983	3.76227	3.32969	2.40001	-0.57231	-1.48711	0.0130148	-0.593068	-0.405706	-0.616711	no change	down	no change	no change	no change	no change	2.35975e-07	0	0	NULL
O32504	pprA	0.0347787	NULL	0.0188727	NULL	0.688607	0.608431	0.103808	0.126742	0.0760414	0.0575438	0.192604	0.159197	1.04582	1.27845	0.360328	0.317399	-0.860225	5.19473	2.70266	1.397	4.12095	2.34294	no change	up	up	up	up	up	1.19038e-06	2	3	sustain_up
O32507	ssdA	0.600948	0.514382	2.4584	2.74089	8.27575	6.24991	2.9872	3.88387	0.267022	0.375853	2.38436	4.46306	3.24912	3.17515	6.09837	4.39952	2.22084	3.70306	2.62306	3.41295	3.32092	4.02942	up	up	up	up	up	up	2.2442e-06	3	3	sustain_up
O32508	cinA	0.488605	0.514266	0.56183	0.615252	0.842535	1.98707	0.831098	0.951762	1.14969	2.3079	0.688798	0.944262	1.90812	1.37864	0.818804	0.684979	0.231079	1.49647	0.830057	-1.08219	-0.0731018	-1.20117	no change	up	no change	down	no change	down	0.00891679	1	0	NULL
O83026	ppsA	0.188578	0.199708	0.348059	0.358167	0.521767	0.636631	0.600515	0.832198	0.161223	0.23951	0.341826	0.605902	0.459141	0.56254	0.581482	0.6629	0.863011	1.57694	1.88356	1.24183	1.35023	1.63472	no change	up	up	up	up	up	0.0748693	NULL	NULL	NULL
O83030	DR_1725	0.0395623	NULL	0.234879	0.121965	0.205768	0.0968495	NULL	0.0923281	NULL	0.27125	0.139741	0.0878811	0.0528081	0.0202078	NULL	0.226802	3.15008	2.91229	1.20954	-0.256361	-1.89672	-0.257525	up	up	up	no change	down	no change	0.0406991	3	0	early_up
P42443	recA	15.5698	18.6379	12.7209	13.5186	13.0174	13.2731	19.7033	19.0583	15.9198	17.8609	13.1696	13.1325	9.59028	10.0543	12.3181	11.9842	-0.382584	-0.37978	0.180307	-0.361019	-0.782066	-0.475108	no change	no change	no change	no change	no change	no change	1.72444e-07	0	0	NULL
P49228	rpmF	104.268	58.5414	13.5748	6.58712	21.9951	31.9318	0.258276	0.326232	102.141	86.805	24.3419	43.7696	9.34711	5.54228	3.91668	2.18225	-3.01348	-1.5941	-8.12174	-1.472	-3.66561	-4.95327	down	down	down	down	down	down	0.00724265	0	0	NULL
P50933	ldh	3.25132	6.03595	4.55303	5.17468	5.28391	4.31116	4.85262	7.06113	3.15929	9.44827	1.57782	5.30719	6.72947	7.32377	9.56085	9.76549	0.0668447	0.0470382	0.359301	-0.872759	0.156613	0.616279	no change	no change	no change	no change	no change	no change	0.0477928	0	0	NULL
P52027	polA	0.999617	0.695303	1.47354	1.64836	1.38948	2.60894	2.86311	2.94686	0.932415	0.787558	1.49322	1.71773	0.94625	1.32005	1.74559	1.93491	0.881208	1.23821	1.77731	0.90061	0.397954	1.09751	no change	up	up	no change	no change	up	0.00121337	2	1	NULL
P52153	rho	3.45625	2.75933	4.2998	3.20456	3.40977	3.74091	5.5363	5.94588	3.17351	2.72992	4.27342	2.4638	3.64487	3.24105	4.64108	3.87366	0.271842	0.202193	0.885436	0.1906	0.222095	0.52841	no change	no change	no change	no change	no change	no change	0.0527082	NULL	NULL	NULL
P56860	cysH	NULL	NULL	0.232298	NULL	0.0498105	NULL	0.0392798	0.0549145	0.102517	NULL	0.109105	NULL	NULL	NULL	0.0466123	NULL	7.51652	5.30943	6.21031	0.0893068	-6.34139	-1.12646	up	up	up	no change	down	down	0.300394	NULL	NULL	NULL
P56861	cysC	NULL	NULL	NULL	NULL	0.0698375	NULL	0.294174	0.437281	NULL	NULL	NULL	0.326551	0.135567	0.281438	NULL	0.147866	0	5.79175	9.16737	8.00672	8.35667	6.86708	no change	up	up	up	up	up	0.000150967	2	3	sustain_up
P56864	sat	1.11283	1.14253	0.957632	0.685977	1.50434	0.554087	0.598055	0.757733	0.956284	0.894047	1.51051	1.22531	0.617033	0.712876	0.610468	0.560571	-0.45649	-0.131818	-0.734225	0.564188	-0.476456	-0.659994	no change	no change	no change	no change	no change	no change	0.0033196	0	0	NULL
P56867	hpi	20.7599	23.7763	17.7777	17.2043	28.15	32.9283	29.475	27.8788	21.0497	19.4972	18.9779	20.03	31.7565	35.5635	30.7649	35.3823	-0.348364	0.455684	0.364914	-0.0558251	0.731443	0.70609	no change	no change	no change	no change	no change	no change	0.0128839	0	0	NULL
P56905	prfA	0.142279	0.150595	0.160037	0.32823	0.226171	0.431336	0.262073	0.121496	0.0391709	0.248766	0.314496	0.260653	0.519675	0.459079	0.222319	0.254767	0.737391	1.16673	0.389208	0.99818	1.76519	0.728497	no change	up	no change	no change	up	no change	0.221527	NULL	NULL	NULL
P56925	hslO	0.431461	0.408904	2.15039	1.43445	2.68285	2.80433	1.65828	1.35188	0.574393	0.423333	3.29824	2.39442	1.25922	1.4618	2.26072	1.48235	2.09282	2.70698	1.84075	2.51239	1.44743	1.90751	up	up	up	up	up	up	3.66335e-06	3	3	sustain_up
P56926	glnS	6.12906	3.39523	1.45747	1.05786	3.35925	2.81101	1.61712	1.7144	9.81207	6.90169	4.8173	1.66919	5.31709	3.65797	3.06581	1.49508	-1.92087	-0.626281	-1.51543	-1.36553	-0.897043	-1.87365	down	no change	down	down	no change	down	0.103559	NULL	NULL	NULL
P83589	DR_2477	0.988131	1.78536	6.38421	3.13059	1.98195	2.31619	3.98255	6.23413	2.44937	3.77002	3.59483	2.29122	6.47976	5.34407	5.12174	4.59614	1.77847	0.632009	1.88115	-0.0794753	0.926851	0.643867	up	no change	up	no change	no change	no change	0.000140265	2	0	early_up
Q46577	uvrA	2.46205	2.15619	2.76312	2.86927	3.67811	3.2599	3.72495	3.79171	2.12311	2.04871	2.28103	3.44471	2.30573	2.01794	3.01532	3.20959	0.286404	0.587178	0.702749	0.456784	0.0515821	0.577376	no change	no change	no change	no change	no change	no change	0.000782046	0	0	NULL
Q46578	plsX	2.16069	1.37239	2.28417	1.38704	5.70831	4.32474	3.52903	4.34948	2.49158	1.84066	4.618	2.90424	4.7699	3.03752	5.7954	7.61766	0.0553284	1.50576	1.15699	0.796049	0.849732	1.63045	no change	up	up	no change	no change	up	0.000514905	2	1	NULL
Q59337	katA	83.0854	83.1985	85.9665	90.0037	32.3154	32.1796	42.996	32.6884	69.494	59.6015	54.2722	63.4227	23.8619	26.286	31.6826	29.3379	0.0816822	-1.36639	-1.13558	-0.133386	-1.36418	-1.08107	no change	down	down	no change	down	down	3.34701e-05	0	0	NULL
Q7DF71	DR_2339	2.94236	3.56875	3.32397	3.35223	1.85663	1.85562	0.581876	0.321383	1.33601	2.33204	1.88878	1.27317	2.68525	0.686141	0.902993	0.36078	0.0361222	-0.810611	-2.84969	-0.214196	-0.121668	-1.53728	no change	no change	down	no change	no change	down	0.00330289	0	0	NULL
Q7DF77	DR_1770	75.6163	5.34371	49.163	9.3883	37.9066	2.89315	61.4465	5.01299	4.30009	3.08303	45.0714	3.50385	22.832	2.40653	33.7727	3.40791	-0.467508	-0.988648	-0.284734	2.71792	1.77332	2.33225	no change	no change	no change	up	up	up	0.559047	NULL	NULL	NULL
Q7DF78	DR_1726	NULL	NULL	0.706374	0.0616783	NULL	0.148149	0.0752508	0.121736	NULL	NULL	0.0154716	0.209156	NULL	0.0960758	0.185985	0.0125074	9.23781	6.86983	7.2747	7.46413	6.24836	7.28569	up	up	up	up	up	up	0.222786	NULL	NULL	NULL
Q7DF80	tnpB	0.0151828	NULL	NULL	0.0550651	NULL	0.0251528	0.0111087	0.00916712	NULL	0.0482613	0.00203894	NULL	0.00521838	0.0017878	0.0096679	NULL	1.81607	0.705104	0.358119	-4.19214	-2.80305	-2.24655	up	no change	no change	down	down	down	0.0964592	NULL	NULL	NULL
Q7DF83	tnpA	1.06441	0.850608	0.736169	1.04652	0.434137	0.53066	1.03274	1.8569	1.30471	0.384023	1.08544	1.17389	1.07879	0.926151	0.831962	0.663847	-0.103304	-0.989062	0.593533	0.41996	0.247619	-0.175014	no change	no change	no change	no change	no change	no change	0.00222405	0	0	NULL
Q7DF92	DR_A0345	0.173646	0.0377639	0.0621857	0.0490342	0.416875	0.113369	0.336424	0.235629	NULL	NULL	0.0230904	NULL	0.217759	0.153493	0.13034	0.0901819	-0.926628	1.32661	1.43611	4.22117	8.189	7.43752	no change	up	up	up	up	up	0.349045	NULL	NULL	NULL
Q9LBE3	DR_1609	13.2183	10.8217	20.6473	12.4387	12.7465	13.6234	6.94708	3.67288	18.3483	13.8471	18.5953	14.3104	8.5261	5.25496	12.6536	7.51511	0.460784	0.133457	-1.17866	0.0314812	-1.22417	-0.674736	no change	no change	down	no change	down	no change	0.00204807	0	0	NULL
Q9R342	EFTU	128.472	256.236	49.0854	207.582	31.1786	44.4885	145.286	95.6812	104.769	192.544	77.5683	168.825	108.706	63.8507	101.532	109.697	-0.583863	-2.34602	-0.674923	-0.271016	-0.784909	-0.493171	no change	down	no change	no change	no change	no change	0.361561	NULL	NULL	NULL
Q9R3J8	DR_1296	0.0654611	0.125562	0.251886	0.1947	0.51214	0.310542	0.50563	0.461586	0.0167308	0.149305	0.0725737	0.244376	0.376611	0.210338	0.436263	0.325035	1.22519	2.10658	2.34009	0.932754	1.82174	2.19696	up	up	up	no change	up	up	0.524008	NULL	NULL	NULL
Q9RR60	eno	4.18202	3.7021	24.7502	24.4696	53.684	52.4822	24.1463	18.3342	3.29461	2.79813	78.5929	73.5039	34.4722	27.0664	65.3485	38.9359	2.64222	3.75123	2.42978	4.64176	3.33633	4.09729	up	up	up	up	up	up	4.23927e-09	3	3	sustain_up
Q9RR62	DR_2635	6.92369	5.76776	19.8037	19.7637	16.021	15.6048	10.6322	9.63233	7.26597	6.19576	20.9781	16.296	15.3234	11.0993	12.6471	10.1888	1.64046	1.31724	0.675099	1.46931	0.972916	0.762436	up	up	no change	up	no change	no change	0.0704047	NULL	NULL	NULL
Q9RR63	tyrS	4.54776	4.8504	5.97966	5.12492	4.82219	7.18183	4.45256	2.78808	3.9194	3.68232	7.89811	8.53317	6.3797	4.49369	5.88401	4.52265	0.240704	0.353067	-0.376262	1.11205	0.516403	0.453109	no change	no change	no change	up	no change	no change	0.000829076	0	1	NULL
Q9RR65	DR_2632	1.20343	0.934276	0.188268	0.179831	0.0542931	0.198851	NULL	0.482352	0.125702	1.82938	0.489735	0.544385	0.551023	1.55703	0.0244993	0.193442	-2.5379	-3.07803	-2.146	-0.918823	0.108682	-3.16522	down	down	down	no change	no change	down	0.078359	NULL	NULL	NULL
Q9RR66	DR_2631	0.0541772	0.136621	NULL	NULL	0.123347	0.255592	0.275139	NULL	NULL	NULL	0.144263	NULL	0.382832	NULL	0.733134	0.131799	-7.22865	0.989923	0.531448	6.83165	8.2357	9.40919	down	no change	no change	up	up	up	0.141877	NULL	NULL	NULL
Q9RR67	thyA	4.55135	1.92483	0.497671	1.64387	2.34673	0.527502	1.02798	2.77367	2.58696	3.24694	1.52379	2.56614	1.19204	0.94789	1.8082	2.70102	-1.59649	-1.17197	-0.76852	-0.512382	-1.4469	-0.371584	down	down	no change	no change	down	no change	0.362122	NULL	NULL	NULL
Q9RR68	DR_2629	NULL	NULL	NULL	NULL	NULL	NULL	NULL	0.0347375	NULL	NULL	NULL	NULL	NULL	NULL	NULL	NULL	0	0	4.79734	0	0	0	no change	no change	up	no change	no change	no change	0.0615447	NULL	NULL	NULL
Q9RR69	DR_2628	0.0672459	0.107245	0.0827848	NULL	NULL	NULL	NULL	NULL	0.0272077	NULL	0.016178	NULL	0.0209366	NULL	0.0318646	0.0841003	-1.06467	-7.09975	-7.09975	-0.727683	-0.368147	2.05826	down	down	down	no change	no change	up	0.000207507	0	1	NULL
Q9RR70	fumC	5.12803	10.034	5.96982	4.79669	9.93095	7.38782	8.84555	9.62694	18.0363	15.1784	12.5937	13.3029	17.5153	14.6288	7.73602	8.61809	-0.493911	0.191876	0.284917	-0.359055	-0.0472667	-1.02217	no change	no change	no change	no change	no change	down	1.1299e-05	0	0	NULL
Q9RR71	DR_2626	0.536606	0.0146802	0.0727805	0.714096	0.726219	0.483844	0.604858	0.585862	0.939099	0.464315	1.68604	0.480392	1.73136	0.855938	1.13553	0.714407	0.513335	1.13421	1.11096	0.626379	0.882508	0.398539	no change	up	up	no change	no change	no change	0.698738	NULL	NULL	NULL
Q9RR72	DR_2625	0.225476	0.343479	0.306188	0.323835	0.262534	0.0254348	0.336816	0.0902985	0.245108	0.0734778	0.395634	0.186456	0.243126	0.0606777	0.317578	0.0979358	0.147091	-0.982402	-0.41369	0.869559	-0.0685424	0.383214	no change	no change	no change	no change	no change	no change	0.617032	NULL	NULL	NULL
Q9RR73	DR_2624	1.84402	0.875824	0.879346	1.05543	1.88865	1.55067	0.481688	1.00059	0.993015	1.39799	1.06227	1.14276	0.988191	1.02701	0.576312	1.90427	-0.491358	0.338601	-0.87571	-0.116819	-0.246693	0.0530584	no change	no change	no change	no change	no change	no change	0.0305048	0	0	NULL
Q9RR74	DR_2623	7.92095	5.65507	4.09698	3.39816	6.66236	5.28531	8.16533	6.89642	9.70303	10.8253	7.65238	4.66505	2.71207	6.64442	5.17345	3.99419	-0.857033	-0.184331	0.149829	-0.736913	-1.13357	-1.16299	no change	no change	no change	no change	down	down	0.000208654	0	0	NULL
Q9RR75	DR_2622	1.0187	0.632074	0.729609	0.620707	2.03646	1.61251	1.70624	0.860287	0.862771	0.720994	1.40121	1.18995	2.63274	1.4001	2.41961	1.94826	-0.289848	1.14434	0.636672	0.710239	1.34844	1.46357	no change	up	no change	no change	up	up	0.0639924	NULL	NULL	NULL
Q9RR76	gpsA	2.16087	1.02651	2.13875	0.427575	0.929885	1.02882	0.4383	0.362841	0.783076	2.18669	0.850522	0.857423	0.590575	0.650296	0.57534	0.516935	-0.312666	-0.702466	-1.99224	-0.79809	-1.259	-1.44301	no change	no change	down	no change	down	down	0.669271	NULL	NULL	NULL
Q9RR77	DR_2620	12.0573	16.0232	4.31741	6.46301	15.2718	8.42403	32.8565	31.7079	12.1783	9.64968	14.7697	8.17772	15.6155	15.2765	25.0698	18.8624	-1.38116	-0.244933	1.20117	0.0721534	0.501056	1.0091	down	no change	up	no change	no change	up	3.65368e-05	1	1	NULL
Q9RR78	ctaB	3.88714	2.60151	3.31888	2.11999	1.93746	3.76845	8.64571	7.96853	0.846741	1.33521	2.22908	0.0971105	0.0209465	0.0358144	0.626927	0.131006	-0.254611	-0.18546	1.35643	0.092347	-5.26458	-1.52548	no change	no change	up	no change	down	down	3.34575e-07	1	0	NULL
Q9RR79	DR_2617	0.135876	0.297907	0.309305	0.448274	0.227563	0.581369	0.496906	0.390088	0.0481086	0.274178	0.358759	0.450424	0.248445	0.224133	0.831403	0.834961	0.804423	0.899046	1.03195	1.32812	0.552209	2.37029	no change	no change	up	up	no change	up	0.000281959	1	2	NULL
Q9RR81	panB	6.22861	5.13104	2.71288	7.13692	7.60912	7.40802	4.04212	3.40061	6.34943	3.09274	4.83171	4.85123	6.24854	1.78401	5.2941	3.97328	-0.205753	0.402691	-0.610015	0.0363276	-0.233262	-0.0269559	no change	no change	no change	no change	no change	no change	0.0520736	NULL	NULL	NULL
Q9RR82	DR_2614	8.59541	7.16509	3.98562	3.53861	3.6579	2.92642	0.602244	1.97093	10.4839	5.84459	4.13335	3.89226	4.34982	3.56302	4.56534	4.11569	-1.0667	-1.25921	-2.61469	-1.02471	-1.04512	-0.911453	down	down	down	down	down	no change	0.0522823	NULL	NULL	NULL
Q9RR83	DR_2613	0.64336	0.160742	0.86956	1.67067	1.99183	1.97158	0.100676	0.15414	2.3845	3.14381	1.46028	0.707829	3.36879	2.09335	0.927124	0.462978	1.65951	2.30129	-1.65792	-1.3504	-0.0173716	-1.99165	up	up	down	down	no change	down	8.6897e-05	2	0	early_up
Q9RR84	DR_2612	0.298306	NULL	NULL	NULL	0.288742	0.449585	0.298882	0.30875	0.109924	NULL	0.370745	0.082194	0.827256	0.327725	0.6823	0.493713	-7.87647	1.30439	1.02333	2.03448	3.38497	3.411	down	up	up	up	up	up	0.0734153	NULL	NULL	NULL
Q9RR85	DR_2610	16.2425	5.19493	9.99836	8.94001	6.88579	5.48542	14.5167	11.2927	4.67479	5.34171	8.60688	14.3208	4.68358	4.57561	5.19166	6.15442	-0.178817	-0.793142	0.26777	1.19471	-0.113421	0.179815	no change	no change	no change	up	no change	no change	0.0130275	0	1	NULL
Q9RR86	DR_2609	0.160657	0.136512	0.0112213	0.0256349	0.0351166	0.0565763	0.039764	0.0473641	0.00214085	0.00558083	0.0124313	0.0483309	0.460516	0.0196639	0.00585051	0.107888	-3.01131	-1.6964	-1.77007	2.97619	5.95852	3.88066	down	down	down	up	up	up	0.0187572	0	3	late_up
Q9RR87	DR_2608	4.89347	1.37477	2.14197	0.359647	0.827743	NULL	NULL	NULL	2.97714	1.6936	0.0094177	NULL	0.00130558	0.608016	0.00068281	NULL	-1.3252	-2.9197	-12.2666	-8.85977	-2.93838	-11.7901	down	down	down	down	down	down	0.456903	NULL	NULL	NULL
Q9RR88	DR_2607	0.168003	0.0659879	0.811229	NULL	0.0564095	0.238265	0.39691	NULL	0.0945128	NULL	0.606275	0.109569	0.537141	0.0668798	0.365159	0.358853	1.79479	0.332669	0.764671	2.91139	2.66634	2.92775	up	no change	no change	up	up	up	0.642073	NULL	NULL	NULL
Q9RR89	ispE	0.676111	NULL	1.61617	0.0607648	0.450585	0.0358776	0.344426	0.263797	0.13026	NULL	0.164614	0.19875	0.62429	0.494845	0.362295	0.153026	1.30914	-0.476287	-0.154017	1.47299	3.09589	1.97705	up	no change	no change	up	up	up	0.0921648	NULL	NULL	NULL
Q9RR90	ispD	0.593703	0.345443	0.128471	0.113309	1.03321	0.720166	0.44172	0.777489	0.737852	0.804628	0.492016	0.776957	1.08118	1.09471	1.01457	1.44047	-1.95765	0.90071	0.376525	-0.281591	0.496351	0.670494	down	no change	no change	no change	no change	no change	0.0555222	NULL	NULL	NULL
Q9RR91	ubiX	1.08986	0.931761	1.19686	1.22937	0.327954	0.121091	1.12521	0.751017	0.653334	0.678192	1.29904	0.00850866	0.398247	0.859855	1.76234	0.364013	0.263206	-2.17058	-0.10768	-0.0262205	-0.0818322	0.6753	no change	down	no change	no change	no change	no change	0.118507	NULL	NULL	NULL
Q9RR92	ackA	6.58381	5.65235	3.4895	3.94715	1.2154	2.40582	5.85911	6.4361	5.35651	8.00771	4.14656	4.47011	3.14545	4.33184	3.50861	3.78776	-0.718425	-1.7566	0.00694648	-0.633175	-0.837788	-0.873126	no change	down	no change	no change	no change	no change	7.24012e-05	0	0	NULL
Q9RR93	DR_2601	0.915678	1.00285	0.101099	0.440582	NULL	0.265235	NULL	0.274013	2.43726	0.533014	0.512146	0.473676	NULL	0.330842	0.271818	0.238292	-1.82449	-2.85121	-2.80434	-1.5912	-3.16361	-2.54172	down	down	down	down	down	down	0.651947	NULL	NULL	NULL
Q9RR95	DR_2599	2.77595	2.89139	2.52821	2.22702	3.15547	2.95752	4.02137	4.22707	3.79609	3.00396	3.06231	2.02022	2.28973	2.35294	3.29061	2.20302	-0.253159	0.109205	0.541448	-0.419998	-0.550591	-0.307786	no change	no change	no change	no change	no change	no change	0.000232316	0	0	NULL
Q9RR96	DR_2598	1.11925	0.0364929	0.198333	NULL	0.496084	0.498935	0.14878	0.873817	0.942415	0.385252	0.719694	0.207458	0.646173	0.0633152	0.116755	0.370807	-2.53821	-0.216028	-0.176586	-0.518014	-0.904042	-1.44523	down	no change	no change	no change	no change	down	0.289452	NULL	NULL	NULL
Q9RR97	nos	0.129267	0.215537	0.209693	0.200986	0.53771	0.156429	0.7718	0.545321	0.102643	0.0406578	0.00875095	0.016171	0.0910619	0.0624081	0.303911	0.215658	0.252234	1.00945	1.93354	-2.52356	0.0989095	1.85827	no change	up	up	down	no change	up	0.0392257	2	1	NULL
Q9RR98	DR_2596	2.54363	2.43696	2.52345	2.51579	4.12805	3.18036	2.02071	2.50699	3.78142	2.24405	4.02569	3.92836	3.4959	1.75775	4.61753	4.4779	0.0168889	0.55324	-0.13754	0.400618	-0.197752	0.594071	no change	no change	no change	no change	no change	no change	7.19641e-05	0	0	NULL
Q9RR99	DR_2595	0.40314	NULL	NULL	NULL	0.040489	0.114592	0.136136	0.0436644	0.0390312	0.10386	0.0512667	0.0331626	0.0959209	0.0681426	0.0602967	0.282614	-8.31015	-1.38053	-1.16716	-0.759106	0.199334	1.26291	down	down	down	no change	no change	up	0.194242	NULL	NULL	NULL
Q9RRA0	DR_2594	0.845404	0.827567	1.50918	1.04358	2.82342	2.13949	2.03655	1.76165	0.352203	0.300439	1.99436	4.30899	3.24281	1.28301	2.93982	2.23673	0.609646	1.56878	1.1829	3.27175	2.79381	2.98763	no change	up	up	up	up	up	0.0100129	2	3	sustain_up
Q9RRA1	DR_2593	0.433411	NULL	0.652034	NULL	0.892217	0.909525	0.282207	0.430217	0.248505	0.0367389	1.53804	6.58557	1.08629	1.36485	0.905688	0.0495313	0.588502	2.05347	0.714885	4.83185	3.10319	1.74364	no change	up	no change	up	up	up	0.00676825	1	3	NULL
Q9RRA2	DR_2592	0.548305	NULL	0.794938	0.607376	0.066444	0.110399	0.617309	NULL	0.783579	0.854051	0.599031	0.737307	1.36969	0.415321	0.699949	0.465983	1.35309	-1.63418	0.170828	-0.293324	0.124326	-0.490126	up	down	no change	no change	no change	no change	0.0358366	1	0	NULL
Q9RRA4	DR_2590	0.777545	0.699925	0.873278	0.323084	1.27252	0.357968	1.15368	1.27859	0.4425	0.537314	0.275411	0.898299	0.751555	0.890785	0.64074	0.713068	-0.304475	0.142173	0.719177	0.260497	0.745173	0.466443	no change	no change	no change	no change	no change	no change	0.158187	NULL	NULL	NULL
Q9RRA5	DR_2589	0.00546161	0.179664	0.400678	NULL	0.00749151	NULL	0.706967	NULL	NULL	NULL	0.0244879	NULL	0.0299062	0.150635	NULL	NULL	1.11622	-4.50954	1.93443	4.30374	7.14893	0	up	down	up	up	up	no change	0.116477	NULL	NULL	NULL
Q9RRA6	DR_2588	2.09584	1.80371	5.30035	4.60015	8.43911	10.3154	3.32105	3.46321	1.99593	2.73756	7.67559	10.5751	1.7317	2.43402	2.13573	3.54672	1.34419	2.26586	0.798883	1.94698	-0.184338	0.263608	up	up	no change	up	no change	no change	1.95181e-09	2	1	NULL
Q9RRA7	DR_2587	1.85103	2.25066	2.69976	0.679617	4.54374	4.61262	6.19384	3.19128	1.33054	1.46213	4.0453	4.12073	3.71541	4.88971	6.56616	5.18046	-0.279462	1.15856	1.19416	1.54799	1.62355	2.07253	no change	up	up	up	up	up	0.00765432	2	3	sustain_up
Q9RRA8	DR_2586	1.25314	1.38809	NULL	0.288848	1.08451	1.7986	2.41386	1.65552	0.0863524	0.168603	0.140629	1.0569	1.54433	2.8077	1.0211	2.99886	-3.18966	0.126413	0.623596	2.23174	4.09337	3.97886	down	no change	no change	up	up	up	0.0166056	0	3	late_up
Q9RRA9	DR_2585	2.54546	2.17739	0.725727	2.03283	0.219466	1.49321	NULL	0.427987	0.583338	0.142792	0.172814	0.122739	0.145202	0.444813	0.0643313	0.351896	-0.775745	-1.46341	-3.46188	-1.29681	-0.299475	-0.802855	no change	down	down	down	no change	no change	0.00109447	0	0	NULL
Q9RRB0	DR_2584	0.041968	0.0239713	NULL	NULL	0.0711174	NULL	NULL	0.00669445	0.0179946	0.0283034	NULL	0.0242353	NULL	NULL	NULL	0.0694941	-5.69581	0.12191	-3.16915	-0.896461	-5.18562	0.599086	down	no change	down	no change	down	no change	0.0342572	0	0	NULL
Q9RRB1	DR_2583	2.38141	2.27601	3.16045	2.91329	1.92478	0.934677	2.94362	5.61253	1.06261	0.78213	2.38476	1.43092	1.63669	0.816137	1.63229	1.36241	0.383053	-0.703793	0.87743	1.04852	0.411025	0.698996	no change	no change	no change	up	no change	no change	0.00859538	0	1	NULL
Q9RRB2	DR_2582	0.0327311	0.0286447	NULL	NULL	0.146229	0.0260902	NULL	0.0431649	0.10002	0.0229897	NULL	0.0464771	0.166006	0.0378341	0.189979	0.0835843	-5.59234	1.48934	-0.48671	-1.38457	0.728662	1.1531	down	up	no change	down	no change	up	0.158886	NULL	NULL	NULL
Q9RRB3	DR_2581	0.263765	0.224917	0.303553	0.387346	0.450838	0.25159	0.188444	0.179671	0.0691423	0.123058	0.139529	0.363003	0.264018	0.267415	0.586313	0.490969	0.499582	0.523456	-0.408739	1.3866	1.46728	2.48671	no change	no change	no change	up	up	up	3.89895e-06	0	3	late_up
Q9RRB4	rsfS	51.7816	46.5568	19.0624	9.17188	26.8754	30.4829	32.538	39.1176	35.352	43.626	29.9584	29.0676	19.8508	40.625	22.8956	24.1314	-1.8003	-0.777753	-0.456676	-0.420102	-0.385093	-0.747962	down	no change	no change	no change	no change	no change	0.000331173	0	0	NULL
Q9RRB5	tgt	4.18785	3.67111	4.13432	2.7431	1.62694	2.63803	2.76212	2.33879	4.45299	3.41835	3.05883	2.35453	2.78216	2.14027	2.27002	1.75732	-0.19247	-0.881803	-0.623584	-0.540086	-0.67724	-0.96678	no change	no change	no change	no change	no change	no change	0.151133	NULL	NULL	NULL
Q9RRB6	slpA	18.2352	15.5393	15.4625	17.4752	23.6947	23.9374	27.7015	32.7016	13.0421	11.7966	27.3206	27.8572	17.3084	18.971	43.0898	47.5912	-0.0361978	0.495996	0.838686	1.1515	0.546565	1.86821	no change	no change	no change	up	no change	up	3.43908e-10	0	2	late_up
Q9RRB7	ppaC	32.8383	30.0591	18.5294	10.9842	27.0612	14.5333	17.1827	24.1512	38.4644	44.9445	28.2943	32.9824	30.1181	33.6085	24.1466	21.6847	-1.09162	-0.596608	-0.605678	-0.444862	-0.388304	-0.863869	down	no change	no change	no change	no change	no change	0.0201709	0	0	NULL
Q9RRC0	DR_2572	0.00888994	NULL	NULL	NULL	0.0219971	0.0213869	NULL	NULL	NULL	NULL	0.0189731	0.0235269	0.00884048	NULL	0.0676304	0.0128951	-2.90462	2.18722	-2.90462	5.06213	2.89711	5.98412	down	up	down	up	up	up	0.000753976	1	3	NULL
Q9RRC1	moaC	0.0704621	0.0859104	0.116444	0.234693	1.76535	1.08754	0.381446	0.214481	0.0285297	0.0602378	0.636611	1.03325	0.178849	0.0738171	0.999417	0.820427	1.16705	4.18936	1.93015	4.23355	1.50913	4.35764	up	up	up	up	up	up	9.33715e-09	3	3	sustain_up
Q9RRC2	DR_2570	NULL	NULL	0.919528	0.998749	2.92334	2.15003	0.0909227	0.0627972	NULL	NULL	0.44175	0.38694	0.630398	0.0554947	1.05751	1.30173	10.5583	11.9615	6.9169	9.34743	9.07458	10.8568	up	up	up	up	up	up	2.95465e-10	3	3	sustain_up
Q9RRC4	argS	14.199	11.3614	6.97955	5.60434	7.03596	6.4089	10.5968	6.66944	14.2113	13.7814	8.70893	11.5912	9.65586	7.74496	11.5493	9.17497	-1.02233	-0.926857	-0.565955	-0.463561	-0.685896	-0.433731	down	no change	no change	no change	no change	no change	0.261417	NULL	NULL	NULL
Q9RRC5	DR_2567	12.9609	10.5628	8.27903	4.33022	4.05788	2.73254	4.57477	3.15413	9.98342	9.73753	5.98471	6.3294	8.60588	7.57593	6.14668	5.67789	-0.899628	-1.79254	-1.60578	-0.679416	-0.285356	-0.737941	no change	down	down	no change	no change	no change	7.44417e-05	0	0	NULL
Q9RRC6	DR_2566	0.20202	NULL	0.168751	NULL	0.267418	0.231204	NULL	0.227742	0.22626	0.236032	0.504823	NULL	0.33458	0.274544	0.346005	0.225679	-0.25871	1.29891	0.172385	0.128789	0.397934	0.306414	no change	up	no change	no change	no change	no change	0.785526	NULL	NULL	NULL
Q9RRC7	DR_2565	1.91512	2.55903	3.50979	3.26706	3.29946	1.81233	3.68341	3.90715	2.29054	2.3124	3.0403	3.1522	2.11789	0.977222	2.87452	4.66865	0.599001	0.192217	0.762594	0.427968	-0.572562	0.712617	no change	no change	no change	no change	no change	no change	0.237193	NULL	NULL	NULL
Q9RRC8	DR_2564	1.81445	1.08285	2.10808	0.659153	0.925394	0.7961	0.742324	0.578901	1.41601	0.69419	0.829471	2.88476	0.318219	0.269777	0.676717	0.699415	-0.0662653	-0.751048	-1.13283	0.815683	-1.8435	-0.61676	no change	no change	down	no change	down	no change	0.280075	NULL	NULL	NULL
Q9RRC9	DR_2563	3.40571	10.6273	14.1171	17.4899	15.6845	19.3908	6.41213	7.29251	4.5449	0.906474	11.3763	8.43573	7.70035	2.0464	19.163	3.58886	1.17142	1.32163	-0.0341633	1.86169	0.838302	2.06129	up	up	no change	up	no change	up	0.00465783	2	2	sustain_up
Q9RRD0	DR_2562	0.0747092	0.254557	NULL	NULL	0.0586044	0.065051	0.066919	0.0538899	NULL	0.00866836	0.0611038	0.0544354	0.0652416	0.0534447	0.10337	0.0709834	-8.01586	-1.41293	-1.44653	3.63432	3.67309	4.22795	down	down	down	up	up	up	0.000135234	0	3	late_up
Q9RRD2	DR_2560	NULL	NULL	NULL	NULL	0.149196	0.0642873	NULL	NULL	NULL	NULL	0.101197	NULL	0.513454	0.672794	0.194465	NULL	0	7.39072	0	6.3228	9.86493	7.26082	no change	up	no change	up	up	up	9.13094e-07	1	3	NULL
Q9RRD3	DR_2559	NULL	0.106858	NULL	NULL	NULL	NULL	NULL	NULL	0.285001	NULL	NULL	0.292686	NULL	NULL	0.45163	NULL	-6.40086	-6.40086	-6.40086	0.0383025	-7.81078	0.66299	down	down	down	no change	down	no change	0.363813	NULL	NULL	NULL
Q9RRD5	DR_2557	4.05125	2.76789	3.67325	1.77129	4.4747	4.69119	6.88713	5.3282	3.64007	3.08131	6.05915	3.03073	5.30605	4.63635	6.97643	4.59483	-0.32478	0.426685	0.841031	0.435504	0.564836	0.783716	no change	no change	no change	no change	no change	no change	0.174886	NULL	NULL	NULL
Q9RRD6	DR_2556	0.280688	0.31812	0.916248	0.769304	2.03949	1.37046	1.23927	1.29913	0.235651	0.100968	0.583784	0.361471	1.27517	0.305235	0.839706	0.612699	1.49306	2.50958	2.08375	1.48959	2.23111	2.10925	up	up	up	up	up	up	0.0434116	3	3	sustain_up
Q9RRD7	gatB	0.00135664	0.169415	0.0493757	0.473228	1.08207	0.716678	0.526498	0.256062	0.1071	0.0756776	0.200928	0.130676	0.541355	0.0433943	0.414561	0.526734	1.61365	3.39686	2.19613	0.859372	1.67773	2.36456	up	up	up	no change	up	up	0.00366949	3	2	sustain_up
Q9RRD8	DR_2554	0.211062	NULL	0.244391	0.352506	0.419626	0.194246	0.298217	NULL	0.172856	0.0777488	0.448473	NULL	0.307852	NULL	0.631855	0.203877	1.49547	1.53593	0.497425	0.841654	0.299802	1.73763	up	up	no change	no change	no change	up	0.110988	NULL	NULL	NULL
Q9RRD9	DR_2553	2.01119	1.04642	4.22742	4.43629	1.93696	6.78343	3.34968	0.745919	13.2355	12.1216	9.33766	7.22476	1.51251	8.39314	1.6388	5.45612	1.50258	1.51199	0.421668	-0.614475	-1.35606	-1.83753	up	up	no change	no change	down	down	0.000345387	2	0	early_up
Q9RRE0	mltG	3.09758	4.31109	1.44025	1.34612	2.13624	3.63105	2.76561	3.0177	2.62942	3.68303	1.95181	2.24109	2.56198	4.18318	1.72597	2.11373	-1.41083	-0.361318	-0.357318	-0.59025	0.0956527	-0.717206	down	no change	no change	no change	no change	no change	0.0259891	0	0	NULL
Q9RRE1	DR_2551	1.2965	0.802352	0.526629	1.25329	0.386448	0.71833	0.298882	1.0577	1.70951	2.42403	0.656621	1.16605	0.957608	0.772658	0.821086	1.22759	-0.237784	-0.925842	-0.629624	-1.18132	-1.25638	-1.01269	no change	no change	no change	down	down	down	0.039707	0	0	NULL
Q9RRE2	DR_2550	0.397449	0.403283	0.257905	0.496062	0.469447	0.0964823	0.547212	0.625325	0.278499	0.187951	0.410573	0.235287	0.261449	0.311369	0.729007	0.693994	-0.0868186	-0.500697	0.550241	0.469501	0.296354	1.60914	no change	no change	no change	no change	no change	up	0.0669213	NULL	NULL	NULL
Q9RRE3	DR_2549	0.815775	0.259628	0.695987	0.434376	0.381115	0.285771	1.66965	1.60459	0.375303	0.0336785	0.610397	0.11742	1.63504	0.66668	1.44415	0.916582	0.0719103	-0.689362	1.60628	0.831542	2.49261	2.52913	no change	no change	up	no change	up	up	0.00147501	1	2	NULL
Q9RRE4	DR_2548	0.0913439	NULL	2.22327	2.50416	1.24787	1.55383	2.52419	3.18457	NULL	NULL	2.82059	3.9017	0.35759	0.96891	5.20113	3.31548	5.68359	4.92884	5.95571	12.3675	10.0262	12.7088	up	up	up	up	up	up	0.00175691	3	3	sustain_up
Q9RRE5	hemA	0.730775	0.484245	0.478346	0.294715	0.710529	0.643314	0.325552	0.510613	0.36167	0.100468	0.420779	0.548123	0.247115	0.677989	0.405676	0.437927	-0.652327	0.156079	-0.539119	1.06803	1.00129	0.868239	no change	no change	no change	up	up	no change	0.00901701	0	2	late_up
Q9RRE6	DR_2546	0.204789	0.0603813	0.233938	0.0941112	0.258961	0.375229	0.656547	0.522477	0.0643937	0.0778488	0.1226	0.219782	0.326805	0.192076	0.280193	0.223582	0.306994	1.258	2.1526	1.26725	1.86705	1.82443	no change	up	up	up	up	up	0.000366568	2	3	sustain_up
Q9RRE7	DR_2545	4.44856	4.90512	6.18904	6.28922	4.33211	4.14996	4.87337	5.53998	4.25451	2.74256	4.4275	4.56669	4.16479	3.42555	3.66033	3.92527	0.415811	-0.141118	0.154828	0.362243	0.117413	0.116512	no change	no change	no change	no change	no change	no change	0.026196	0	0	NULL
Q9RRE8	DR_2544	NULL	NULL	NULL	NULL	NULL	NULL	NULL	NULL	NULL	NULL	NULL	NULL	0.0962319	NULL	NULL	NULL	0	0	0	0	6.25069	0	no change	no change	no change	no change	up	no change	0.0615447	NULL	NULL	NULL
Q9RRE9	cmk	0.0370895	NULL	0.0501695	0.0118469	0.134811	0.119487	0.0545482	0.444311	NULL	0.172846	0.0895946	0.693918	0.210978	0.382785	0.677809	0.540974	0.717106	2.7529	3.72502	2.17517	1.7751	2.81259	no change	up	up	up	up	up	0.207083	NULL	NULL	NULL
Q9RRF0	DR_2542	7.94157	3.03072	4.03936	0.514994	9.28144	7.22993	6.82833	3.28467	15.4043	3.8308	5.12106	3.78587	11.6492	9.42096	5.02513	5.34507	-1.26855	0.589596	-0.117653	-1.11074	0.131466	-0.891295	down	no change	no change	down	no change	no change	0.5876	NULL	NULL	NULL
Q9RRF2	DR_2540	1.56098	3.86012	6.94402	7.05926	0.625621	0.776897	3.1488	2.46904	3.3335	3.48577	4.52595	4.36525	1.99317	1.02414	1.1391	3.81814	1.36911	-1.95057	0.05143	0.382762	-1.17636	-0.46008	up	down	no change	no change	down	no change	0.00141201	1	0	NULL
Q9RRF3	DR_2539	0.133738	0.152688	0.112071	0.056028	0.110798	0.143791	0.0740018	NULL	0.0261434	0.0971896	0.0347945	0.174414	0.0369873	0.253768	0.16572	0.167609	-0.768852	-0.169993	-1.94018	0.762382	1.23725	1.43439	no change	no change	down	no change	up	up	0.0199364	0	2	late_up
Q9RRF4	DR_2538	1.18275	0.332638	0.594796	0.560169	1.33208	1.13494	1.50382	1.06201	0.727602	0.505617	0.589667	0.774935	0.500834	0.845748	0.709684	1.19084	-0.391841	0.703081	0.75974	0.146051	0.126873	0.623969	no change	no change	no change	no change	no change	no change	0.076628	NULL	NULL	NULL
Q9RRF6	msrP	NULL	NULL	NULL	NULL	NULL	NULL	0.0287041	0.0486941	NULL	0.0570532	NULL	NULL	NULL	NULL	NULL	0.0348924	0	0	5.92697	-5.50297	-5.50297	-0.699328	no change	no change	up	down	down	no change	0.0244728	1	0	NULL
Q9RRF7	DR_2535	3.0842	3.7475	3.6961	1.94921	4.88366	3.23004	1.4682	1.76925	6.62077	12.4608	5.98991	6.63398	3.57816	4.30587	3.90625	3.06777	-0.275194	0.248114	-1.07739	-0.596023	-1.27518	-1.45212	no change	no change	down	no change	down	down	0.00181362	0	0	NULL
Q9RRF8	DR_2534	NULL	0.124291	NULL	NULL	NULL	0.121334	0.126252	0.09975	NULL	0.116559	0.130084	NULL	0.112702	NULL	0.095793	0.0903877	-6.61769	-0.0345685	0.855243	0.157566	-0.0482824	0.667792	down	no change	no change	no change	no change	no change	0.446388	NULL	NULL	NULL
Q9RRF9	DR_2533	0.179018	0.217372	0.205899	0.135134	0.255391	0.344242	0.132562	0.0420849	0.252394	0.17676	0.325221	0.252202	0.010204	0.109087	0.257908	0.243678	-0.21701	0.597158	-1.18248	0.428133	-1.84701	0.225002	no change	no change	down	no change	down	no change	2.46131e-07	0	0	NULL
Q9RRG1	DR_2531	0.505081	0.196486	2.73814	2.43438	4.35232	3.37174	0.716806	0.386132	0.390207	0.838339	0.850042	0.581707	2.64288	3.961	2.25075	3.59539	2.88221	3.46071	0.652699	0.220827	2.42636	2.25053	up	up	no change	no change	up	up	8.50992e-07	2	2	sustain_up
Q9RRG3	DR_2529	10.756	9.16468	16.0502	13.2867	35.1166	35.745	47.3656	46.8268	5.5957	6.86826	25.3904	17.909	9.75322	15.9439	45.8889	27.3244	0.558446	1.83073	2.24134	1.79658	1.04384	2.55434	no change	up	up	up	up	up	4.00133e-05	2	3	sustain_up
Q9RRG4	DR_2528	9.54732	13.1367	17.7373	21.2352	22.5366	19.4033	25.411	10.8427	11.0678	9.79181	6.63345	22.1817	22.5029	22.4021	38.0963	27.0232	0.78078	0.886648	0.676453	0.466117	1.10617	1.64238	no change	no change	no change	no change	up	up	0.00836249	0	2	late_up
Q9RRG5	DR_2527	4.06368	9.31557	3.25344	6.43548	6.29523	5.28494	6.56316	3.92789	4.50455	4.18862	2.83195	6.51387	5.45592	3.75448	2.88374	5.2154	-0.465589	-0.208341	-0.350838	0.104439	0.0833805	-0.102113	no change	no change	no change	no change	no change	no change	0.649937	NULL	NULL	NULL
Q9RRG6	DR_2526	16.2159	18.2825	28.8602	33.8992	13.1322	11.3891	11.3558	11.4716	17.5097	23.3554	17.0489	20.3603	18.2478	20.0747	13.4358	15.0332	0.863299	-0.492498	-0.595759	-0.127473	-0.0926751	-0.521478	no change	no change	no change	no change	no change	no change	6.6908e-08	0	0	NULL
Q9RRG7	dctA	0.808412	0.345001	0.933195	0.89724	1.04906	1.46886	0.471081	0.717094	0.347299	0.291862	0.578221	NULL	1.13353	0.353936	1.1039	1.3226	0.666277	1.12633	0.0428386	-0.142972	1.21861	1.92463	no change	up	no change	no change	up	up	0.000446582	1	2	NULL
Q9RRG8	rpmB	1.2009	63.2984	5.90695	4.27825	25.9284	21.9824	5.20042	8.04892	1.02427	60.6428	16.6671	13.1564	12.4029	7.52637	2.20297	2.16148	-2.66281	-0.428933	-2.28336	-1.04805	-1.62961	-3.82063	down	no change	down	down	down	down	0.613242	NULL	NULL	NULL
Q9RRH0	DR_2521	NULL	0.012455	NULL	0.119934	0.0556909	0.0871447	NULL	0.00936467	0.0175006	0.0104803	0.0106247	0.00482464	0.0112325	0.00538763	0.0126798	0.031542	3.20322	3.4477	-0.388472	-0.856897	-0.75151	0.660313	up	up	no change	no change	no change	no change	0.0117912	2	0	early_up
Q9RRH3	rqkA	0.825789	1.07694	1.00279	0.845565	0.566789	0.533818	0.652973	1.14633	0.757248	0.964325	0.298387	0.353657	0.582687	0.445812	0.404171	0.395401	-0.0418285	-0.789769	-0.0806305	-1.40069	-0.743187	-1.10643	no change	no change	no change	down	no change	down	0.000671449	0	0	NULL
Q9RRH4	DR_2517	NULL	NULL	0.105614	0.0737725	0.43293	0.199453	0.409631	0.225697	NULL	NULL	NULL	NULL	0.0585392	0.194609	0.214762	0.0570337	7.13968	8.9574	8.9641	0	7.63658	7.73912	up	up	up	no change	up	up	0.0680888	NULL	NULL	NULL
Q9RRH5	DR_2516	0.185975	0.163576	0.139782	0.0610924	0.0863362	0.121884	0.0283283	0.135031	0.208889	0.223005	0.0743707	0.105666	0.187706	0.0923753	0.0476052	0.082121	-0.799207	-0.747391	-1.09745	-1.26239	-0.624829	-1.73521	no change	no change	down	down	no change	down	0.27048	NULL	NULL	NULL
Q9RRH6	DR_2515	4.28333	2.29036	2.92445	1.90144	1.4121	1.0998	1.94643	1.06299	2.40777	3.77717	1.28751	1.95391	1.81572	1.38959	0.988348	0.516053	-0.44591	-1.38792	-1.12722	-0.932131	-0.948298	-2.03957	no change	down	down	no change	no change	down	0.2265	NULL	NULL	NULL
Q9RRH7	DR_2514	1.22322	0.988174	0.763613	0.713581	0.933056	0.637071	1.0706	0.79146	0.525903	0.500604	1.46216	1.25509	0.12189	0.142963	0.549317	0.837933	-0.582097	-0.494074	-0.248059	1.40441	-1.95448	0.434485	no change	no change	no change	up	down	no change	3.65133e-08	0	1	NULL
Q9RRH8	DR_2513	0.236315	0.184619	0.544888	0.479124	0.425745	0.19158	0.0623035	0.661062	0.171413	0.122658	0.260776	0.182583	0.204733	0.102853	0.18223	0.243629	1.28257	0.552436	0.781131	0.592306	0.0648214	0.534209	up	no change	no change	no change	no change	no change	0.438582	NULL	NULL	NULL
Q9RRH9	DR_2512	50.1322	61.9751	60.9173	40.0743	29.5422	28.5907	29.0788	22.454	71.1522	50.9803	50.6904	37.9979	33.8164	27.8529	32.0079	28.0125	-0.150645	-0.947453	-1.12132	-0.461632	-0.985824	-1.02492	no change	no change	down	no change	no change	down	0.414254	NULL	NULL	NULL
Q9RRI0	DR_2511	0.714223	0.446184	0.104379	0.0793007	1.10736	0.530844	0.677491	0.641698	0.376016	0.219526	0.400608	0.302326	1.01372	0.54156	1.02449	0.899468	-2.65937	0.497487	0.185022	0.239184	1.3849	1.6918	down	no change	no change	no change	up	up	0.00973176	0	2	late_up
Q9RRI1	DR_2510	2.24057	1.8918	2.86393	2.09172	5.97665	6.80987	3.29138	3.8546	2.34335	1.44763	3.09149	2.73884	4.35049	4.03972	4.88481	3.83774	0.262106	1.62958	0.790165	0.621006	1.14614	1.20218	no change	up	no change	no change	up	up	5.97455e-06	1	2	NULL
Q9RRI2	yqgF	NULL	NULL	NULL	NULL	NULL	0.0128784	NULL	NULL	NULL	NULL	NULL	NULL	0.190034	0.152042	NULL	0.0299768	0	3.40918	0	0	8.07092	4.58881	no change	up	no change	no change	up	up	2.35264e-11	1	2	NULL
Q9RRI3	DR_2507	16.9087	20.5981	5.76919	6.32293	7.81851	7.7675	11.7013	15.1571	18.8448	23.3346	11.9514	10.6861	13.8711	14.2024	12.4502	12.3431	-1.63308	-1.2669	-0.481776	-0.897826	-0.58733	-0.766588	down	down	no change	no change	no change	no change	0.00040047	0	0	NULL
Q9RRI4	DR_2506	14.4618	17.507	13.3714	8.96503	7.54484	6.88074	4.94562	8.66856	13.9516	18.5452	8.4588	6.95634	6.86807	9.42935	6.36322	5.86602	-0.517261	-1.14803	-1.23155	-1.07595	-0.995651	-1.40996	no change	down	down	down	no change	down	0.100714	NULL	NULL	NULL
Q9RRI5	DR_2505	1.5608	4.85863	6.40772	5.2011	3.73369	3.04682	3.98371	4.46796	12.1808	12.0187	4.95338	4.6827	2.32444	5.74848	1.75969	3.99713	0.854704	0.0789461	0.39679	-1.32846	-1.58382	-2.07163	no change	no change	no change	down	down	down	1.95663e-07	0	0	NULL
Q9RRI6	DR_2504	0.0405779	0.139509	0.0615898	0.254141	0.02515	0.0683741	0.506207	0.266729	0.258072	0.0506717	0.154032	0.0421596	0.172886	0.17289	0.300634	0.0729856	0.809998	-0.945285	2.10165	-0.654148	0.163426	0.275157	no change	no change	up	no change	no change	no change	0.0157939	1	0	NULL
Q9RRI7	DR_2503	6.24982	4.17033	3.54346	4.74273	1.49774	1.69222	1.7698	2.82538	6.19818	5.33893	2.67439	3.75701	1.53455	2.11329	1.76613	1.21129	-0.330594	-1.70776	-1.18118	-0.843077	-1.66117	-1.95415	no change	down	down	no change	down	down	0.0738668	NULL	NULL	NULL
Q9RRI8	DR_2502	0.491474	0.625834	0.489509	0.442208	0.0675471	0.0816002	0.838592	1.22133	0.559168	0.540999	0.342266	NULL	0.595488	0.415601	0.455927	0.340334	-0.262062	-2.90522	0.882566	-1.68185	-0.121812	-0.46641	no change	down	no change	down	no change	no change	9.30211e-07	0	0	NULL
Q9RRI9	DR_2501	NULL	NULL	NULL	NULL	0.0614815	0.0705956	NULL	NULL	NULL	NULL	NULL	NULL	0.0362548	0.043738	0.033797	NULL	0	6.69798	0	0	5.97454	4.75847	no change	up	no change	no change	up	up	0.000211889	1	2	NULL
Q9RRJ0	DR_2500	NULL	NULL	NULL	NULL	0.14992	0.175453	0.0362596	0.011656	NULL	NULL	NULL	NULL	0.21679	0.123262	0.080453	0.0027893	0	7.9987	5.23517	0	8.06235	6.03199	no change	up	up	no change	up	up	0.888608	NULL	NULL	NULL
Q9RRJ1	ndk	26.6421	39.5331	30.082	17.9536	8.3243	3.51873	2.04469	5.73901	32.7391	55.6005	2.97499	7.31178	3.82133	2.51738	3.77904	0.912728	-0.462186	-2.48225	-3.08776	-3.10227	-3.8008	-4.23486	no change	down	down	down	down	down	0.00172366	0	0	NULL
Q9RRJ2	DR_2498	1.01187	0.713043	1.65641	1.12801	0.575519	0.442021	0.756773	1.8398	0.771519	0.983395	1.09209	1.10274	1.04374	0.697011	0.770616	0.518405	0.690852	-0.761438	0.590084	0.322709	-0.0116872	-0.445124	no change	no change	no change	no change	no change	no change	0.0119773	0	0	NULL
Q9RRJ3	DR_2497	0.285783	0.208421	0.29777	0.326205	0.378	0.114849	0.883402	0.0197343	0.0450299	0.716495	0.566054	0.925264	0.280402	0.142367	0.210116	0.470588	0.33638	-0.00396244	0.869836	0.969626	-0.84902	-0.161863	no change	no change	no change	no change	no change	no change	0.17316	NULL	NULL	NULL
Q9RRJ4	murD	1.78729	3.73221	0.579707	0.457917	1.05005	1.89994	1.76089	2.31761	4.38596	5.80602	2.72986	2.69257	4.90084	5.4128	1.73493	1.45191	-2.41126	-0.90383	-0.4365	-0.910423	0.0171194	-1.67724	down	no change	no change	no change	no change	down	1.19456e-05	0	0	NULL
Q9RRJ5	hisA	4.13053	2.95358	3.04538	5.22238	4.9106	3.29419	8.85823	10.7995	3.01251	2.09606	5.69976	5.09582	4.55467	6.60006	8.63909	6.45393	0.222908	0.21188	1.47244	1.07945	1.12666	1.56289	no change	no change	up	up	up	up	0.00324417	1	3	NULL
Q9RRJ6	rpoZ	0.0558666	NULL	NULL	NULL	2.03329	1.93314	0.0433112	0.215442	NULL	1.56162	0.973666	1.3442	0.060608	2.53932	1.1451	2.36454	-5.47299	6.13338	2.19518	0.569169	0.734843	1.16769	down	up	up	no change	no change	up	0.0159605	2	1	NULL
Q9RRJ7	DR_2493	32.7753	25.886	19.8218	19.3162	9.53154	6.56202	4.5886	8.30874	24.7917	29.2162	17.0965	18.398	16.5485	11.911	8.13876	4.73201	-0.58384	-1.86593	-2.18533	-0.605573	-0.924261	-2.06907	no change	down	down	no change	no change	down	0.00658471	0	0	NULL
Q9RRJ8	DR_2491	0.0724354	0.0866852	NULL	NULL	0.134906	0.00145094	0.0521886	0.298284	0.169007	0.168353	0.0482571	NULL	0.78554	0.612412	0.0451679	0.0953686	-6.96672	-0.222732	1.13918	-2.78658	2.05095	-1.26334	down	no change	up	down	up	down	5.42257e-08	1	1	NULL
Q9RRJ9	DR_2490	0.0328778	NULL	NULL	NULL	0.00806888	NULL	0.053795	0.0345478	NULL	0.0414491	NULL	0.0555624	NULL	0.0624401	0.00105231	0.0651599	-4.71943	-1.94485	1.39835	0.417219	0.583781	0.653784	down	down	up	no change	no change	no change	0.337381	NULL	NULL	NULL
Q9RRK0	DR_2489	0.0302489	0.250737	0.0450875	0.0781008	0.0234199	0.0125248	NULL	0.051831	0.0835687	0.0407978	NULL	0.0446674	NULL	NULL	0.0410555	NULL	-1.18963	-2.96665	-2.42102	-1.4569	-6.6112	-1.57677	down	down	down	down	down	down	0.483508	NULL	NULL	NULL
Q9RRK1	DR_2488	0.0642771	0.279895	0.19666	0.00203467	0.182336	0.0637035	0.359967	0.308746	0.134013	0.100511	0.0262292	0.0471457	0.20261	0.147275	0.217809	0.115132	-0.79258	-0.484239	0.958255	-1.67638	0.577142	0.505531	no change	no change	no change	down	no change	no change	0.0462561	0	0	NULL
Q9RRK2	DR_2487	3.15012	4.30905	0.826318	0.91947	1.49036	0.811559	1.06814	1.29761	3.81307	6.68078	0.856445	1.27673	1.73188	1.89254	1.4685	2.14936	-2.09514	-1.69618	-1.65672	-2.29847	-1.53372	-1.53634	down	down	down	down	down	down	0.287436	NULL	NULL	NULL
Q9RRK3	DR_2486	0.075687	NULL	0.166964	0.111446	0.120288	0.129937	0.386726	0.131619	0.0991659	NULL	0.0228703	0.163861	0.145342	0.0846268	0.0182138	0.236277	1.86702	1.71303	2.76372	0.903823	1.2043	1.35047	up	up	up	no change	up	up	0.327708	NULL	NULL	NULL
Q9RRK5	DR_2484	0.409802	0.334371	0.945769	0.757748	0.546271	0.71576	0.0526805	0.730134	0.151615	0.508381	0.789731	1.37588	0.230663	3.15373	0.360887	0.821635	1.19481	0.762038	0.0730327	1.71425	2.35837	0.841336	up	no change	no change	up	up	no change	0.362644	NULL	NULL	NULL
Q9RRK7	DR_2482	0.449009	0.114606	0.172103	0.140545	1.24495	1.35581	0.501864	0.404922	0.282056	0.165554	1.65606	1.01094	0.461124	0.36626	0.510815	0.497665	-0.850174	2.20615	0.686051	2.5749	0.886316	1.17187	no change	up	no change	up	no change	up	6.18153e-09	1	2	NULL
Q9RRK8	DR_2481	0.984066	0.395249	0.0832714	0.0538395	NULL	NULL	0.551862	NULL	0.461092	0.734921	0.110682	0.119167	0.453304	0.0869485	1.04996	0.41281	-3.33054	-10.0825	-1.31991	-2.37948	-1.14653	0.290469	down	down	down	down	down	no change	0.126748	NULL	NULL	NULL
Q9RRK9	DR_2480	4.04271	4.96656	3.00038	2.23673	6.96971	7.91621	5.97479	8.1254	3.83247	3.58054	6.07876	6.60763	2.63973	4.23673	13.8225	8.93327	-0.782638	0.724467	0.646233	0.775149	-0.108394	1.6181	no change	no change	no change	no change	no change	up	6.18499e-06	0	1	NULL
Q9RRL1	DR_2478	0.174806	0.168021	0.0885961	0.0765771	0.0295871	0.0694389	0.300396	0.332752	0.205889	0.16394	0.309421	0.270973	0.309542	0.189438	0.451509	0.224212	-1.0535	-1.7916	0.885057	0.650175	0.432125	0.86957	down	down	no change	no change	no change	no change	0.0020705	0	0	NULL
Q9RRL3	DR_2475	0.405107	0.1833	0.0150016	NULL	0.0478149	0.0408056	NULL	0.0433717	0.235752	0.0888833	0.180334	0.0175051	0.257144	0.0679628	0.307382	0.217033	-5.23371	-2.7311	-3.74098	-0.714494	0.00209427	0.69189	down	down	down	no change	no change	no change	0.00170584	0	0	NULL
Q9RRL4	DR_2474	NULL	0.159009	0.22599	0.14318	0.156777	0.137152	0.471235	0.398157	0.0823627	0.124415	0.0757714	0.104875	0.198963	0.195189	0.206062	0.159993	1.20941	0.880601	2.44514	-0.194913	0.93067	0.823976	up	no change	up	no change	no change	no change	7.4748e-06	2	0	early_up
Q9RRL5	DR_2473	0.291921	NULL	0.0994752	0.204476	0.0639543	NULL	0.465316	0.122026	0.267801	NULL	0.185256	0.0831745	0.107566	0.131682	0.294613	0.173946	0.0551184	-2.17933	1.00548	-3.14043e-05	-0.16608	0.803649	no change	down	up	no change	no change	no change	0.630567	NULL	NULL	NULL
Q9RRL7	acsA	3.17751	3.51404	2.29849	2.38358	3.69692	3.82537	3.53995	3.51615	3.5157	2.83334	2.44259	2.60775	2.48468	3.12216	4.28908	4.22086	-0.515191	0.168831	0.0765318	-0.330158	-0.179352	0.422609	no change	no change	no change	no change	no change	no change	4.80461e-06	0	0	NULL
Q9RRM1	DR_2467	NULL	NULL	NULL	NULL	0.00420861	NULL	0.0199996	0.00480077	NULL	NULL	NULL	0.00381376	NULL	0.00981218	0.00644988	NULL	0	1.92914	4.28503	1.80649	3.03793	2.47771	no change	up	up	up	up	up	0.0370182	2	3	sustain_up
Q9RRM2	DR_2466	0.0268023	0.050259	0.0909797	NULL	0.561176	2.40508	NULL	NULL	0.0283292	0.980538	NULL	0.0497282	0.270576	NULL	0.0776345	3.85635	0.249589	5.26649	-5.92068	-4.32419	-1.89524	1.96326	no change	up	down	down	down	up	0.0141938	1	1	NULL
Q9RRM3	DR_2465	6.95137	9.53986	1.51842	3.49562	2.55806	3.36326	4.81649	3.39875	13.1772	15.0534	7.57914	9.17175	6.02204	6.41824	6.16464	6.97162	-1.71765	-1.47771	-1.00533	-0.753023	-1.18224	-1.10371	down	down	down	no change	down	down	0.00243025	0	0	NULL
Q9RRM4	DR_2464	0.679704	0.405444	26.4307	17.2764	2.39313	0.820335	11.6275	7.02682	1.00497	0.799629	2.23272	1.52732	2.58541	2.20265	2.49508	2.85417	5.3319	1.56624	4.10355	1.05907	1.40776	1.56765	up	up	up	up	up	up	8.80362e-08	3	3	sustain_up
Q9RRM5	DR_2463	1.69788	0.964929	2.90367	3.35046	3.12937	0.658699	6.31874	9.59606	2.99166	0.730636	3.18598	0.790991	1.76724	1.36809	4.1558	3.66332	1.23186	0.508515	2.57935	0.0954767	-0.247576	1.07082	up	no change	up	no change	no change	up	0.00417094	2	1	NULL
Q9RRM6	rny	0.707213	0.80541	0.875519	0.567251	3.0432	2.04219	2.60067	1.59537	0.311919	0.312524	1.06243	1.10893	0.407464	0.408568	2.73372	1.82608	-0.0682112	1.74931	1.47198	1.79796	0.386057	2.86833	no change	up	up	up	no change	up	8.23126e-06	2	2	sustain_up
Q9RRM7	hisC	3.58902	4.37953	4.95408	8.15826	4.06602	2.35301	4.01138	2.07089	3.68177	3.28815	4.11214	4.4991	4.67908	1.7118	2.97211	3.49446	0.718536	-0.311961	-0.389709	0.305077	-0.125129	-0.108142	no change	no change	no change	no change	no change	no change	0.128545	NULL	NULL	NULL
Q9RRM9	DR_2459	2.60908	5.4392	1.87197	1.38793	4.18082	3.31042	5.09396	6.42581	1.51575	4.44202	3.11982	3.46125	4.07397	6.17367	4.07982	3.34683	-1.30386	-0.103476	0.517359	0.143549	0.782445	0.317938	down	no change	no change	no change	no change	no change	0.00435264	0	0	NULL
Q9RRN0	DR_2458	0.296327	0.235656	NULL	NULL	0.168193	0.0929794	NULL	NULL	0.310482	0.139521	NULL	0.613391	0.710268	0.21915	0.272328	0.27214	-8.70798	-1.02638	-8.70798	0.448368	1.04639	0.274912	down	down	down	no change	up	no change	0.124435	NULL	NULL	NULL
Q9RRN5	DR_2453	0.690896	0.512635	1.09879	0.420986	0.797064	1.23463	1.12747	0.991127	0.393754	0.456901	0.783768	0.856749	1.30866	0.891984	0.922365	1.25995	0.336582	0.755412	0.815838	0.947504	1.37128	1.35922	no change	no change	no change	no change	up	up	0.572388	NULL	NULL	NULL
Q9RRN6	DR_2452	NULL	NULL	0.116893	NULL	0.11299	1.70034	0.435072	0.213711	NULL	NULL	1.306	1.87994	0.0891305	0.113331	1.09708	0.897998	6.52961	10.4772	8.99434	11.2902	7.31425	10.615	up	up	up	up	up	up	4.38471e-05	3	3	sustain_up
Q9RRP0	DR_2448	0.365405	0.330334	NULL	0.119006	0.0333848	0.033648	NULL	NULL	0.537159	1.0221	0.00908592	0.475931	0.052479	0.697251	1.47324	0.264409	-2.53982	-3.37561	-9.09515	-1.68476	-1.05642	0.156268	down	down	down	down	down	no change	0.195059	NULL	NULL	NULL
Q9RRP1	uppS	0.776426	0.711208	0.919637	0.130916	1.54265	0.0726041	2.16736	1.06216	0.813828	0.56294	1.75927	1.50556	0.962634	3.03129	1.80941	1.49107	-0.50187	0.118742	1.1183	1.24573	1.53652	1.26139	no change	no change	up	up	up	up	0.0935446	NULL	NULL	NULL
Q9RRP2	DR_2446	2.45928	3.77143	10.6276	3.71557	9.83861	7.17963	0.419776	0.242399	1.49329	NULL	NULL	2.53121	2.88065	1.53313	5.22322	6.42421	1.2029	1.44961	-3.23411	0.761079	1.5629	2.96283	up	up	down	no change	up	up	8.64509e-06	2	2	sustain_up
Q9RRP3	DR_2445	0.836038	0.57004	0.178406	0.187442	4.15808	2.5546	1.60194	2.49949	0.175097	0.151677	0.559211	0.406766	2.76616	1.88763	2.36989	2.30666	-1.94236	2.25521	1.54445	1.5637	3.83204	3.83908	down	up	up	up	up	up	0.0139764	2	3	sustain_up
Q9RRP4	DR_2444	1.75195	1.59097	2.97682	1.65653	2.92812	4.13601	2.45605	2.90318	2.33837	1.64018	4.33746	4.41287	2.12614	1.83588	6.56422	4.1588	0.470946	1.0794	0.680916	1.13709	-0.00601045	1.43039	no change	up	no change	up	no change	up	2.41746e-05	1	2	NULL
Q9RRP5	DR_2443	0.0234671	NULL	NULL	NULL	0.0502568	0.0253576	0.149794	0.0524585	0.0193804	NULL	0.0780846	0.0963812	0.143415	0.242499	0.299784	0.313473	-4.2439	1.64944	3.06886	3.12368	4.26902	4.93723	down	up	up	up	up	up	2.03979e-05	2	3	sustain_up
Q9RRP6	argB	3.32424	3.03317	0.929915	1.01686	4.15977	3.75046	0.127478	0.743958	2.75815	1.89437	2.03214	1.54595	3.19751	2.95065	3.86449	2.30215	-1.70736	0.31528	-2.86697	-0.378825	0.402142	0.406473	down	no change	down	no change	no change	no change	4.66572e-07	0	0	NULL
Q9RRP7	DR_2441	1.73004	1.37035	1.20971	0.67986	1.71418	1.29437	0.866454	0.328114	2.3128	1.76931	1.34818	1.95594	NULL	0.867008	1.28779	0.87373	-0.714393	-0.043381	-1.37596	-0.305049	-2.23414	-0.917267	no change	no change	down	no change	down	no change	0.000137078	0	0	NULL
Q9RRP8	DR_2440	NULL	0.0773738	NULL	NULL	NULL	0.0106888	0.0531494	NULL	0.0570926	0.124058	NULL	0.082194	NULL	0.00866928	NULL	0.0138648	-5.93833	-2.78416	-0.53644	-1.12896	-4.28299	-3.64297	down	down	no change	down	down	down	0.0782728	NULL	NULL	NULL
Q9RRP9	DR_2439	3.69511	3.06294	0.982725	1.46566	2.12448	2.15525	4.84186	6.35815	2.22913	3.76617	1.37556	2.46833	2.14768	3.97171	4.97682	3.55717	-1.46478	-0.659086	0.728822	-0.641267	0.0295555	0.509388	down	no change	no change	no change	no change	no change	0.0194217	0	0	NULL
Q9RRQ0	DR_2438	1.25403	0.301074	0.419211	0.245425	0.852921	0.567709	0.416049	0.354895	0.647103	0.523794	0.728459	0.837322	1.22753	0.82253	1.15867	1.1864	-1.22637	-0.130478	-1.01231	0.419268	0.808053	1.00202	down	no change	down	no change	no change	up	0.00431753	0	1	NULL
Q9RRQ2	DR_2436	3.38474	2.60552	NULL	NULL	3.046	4.61298	1.08374	1.22844	1.86242	1.68632	0.864249	NULL	4.66623	2.6718	2.02729	1.61273	-12.2011	0.354536	-1.37336	-2.03673	1.04809	0.0366393	down	no change	down	down	up	no change	0.0219706	0	1	NULL
Q9RRQ3	fmt	3.77752	3.42133	3.01952	2.93338	1.46976	1.6909	1.60551	2.20712	5.38666	4.76056	2.75219	2.31396	1.97571	1.41676	1.66293	1.52285	-0.274173	-1.18754	-0.916979	-1.00212	-1.58068	-1.67137	no change	down	no change	down	down	down	2.61047e-06	0	0	NULL
Q9RRQ4	def	0.109687	0.076429	0.00669637	NULL	2.41339	2.0271	0.633066	0.403868	0.129124	0.0648145	1.26118	1.24964	3.57681	1.58164	3.41102	3.88477	-4.66576	4.57645	2.47805	3.69448	4.73326	5.23339	down	up	up	up	up	up	7.92204e-06	2	3	sustain_up
Q9RRQ5	DR_2433	0.288605	0.907293	0.532189	0.2988	0.242521	0.616986	0.44295	0.807589	0.277323	0.947827	0.513787	0.145733	0.285473	0.460038	0.337339	0.43711	-0.525193	-0.476512	0.0644555	-0.893469	-0.716656	-0.661716	no change	no change	no change	no change	no change	no change	0.750229	NULL	NULL	NULL
Q9RRQ6	DR_2432	0.846405	0.320655	NULL	0.423762	0.766357	0.921458	0.238373	0.414408	0.365499	0.420991	0.570016	0.350863	0.618205	0.286225	0.570704	0.672535	-1.45939	0.532278	-0.83821	0.227583	0.201581	0.660603	down	no change	no change	no change	no change	no change	0.00182848	0	0	NULL
Q9RRQ7	DR_2431	0.559786	0.771902	0.0692707	0.338366	0.844977	0.813432	0.57738	1.1202	0.363288	0.195729	0.567335	0.205577	0.959456	0.960878	1.01728	0.500441	-1.7079	0.316544	0.350225	0.467411	1.78039	1.44095	down	no change	no change	no change	up	up	0.0303189	0	2	late_up
Q9RRQ8	DR_2430	0.34235	0.19372	0.70047	0.850644	0.0253024	0.486451	0.334872	0.296289	0.125943	0.160061	0.288502	0.381799	0.203489	0.156933	0.381982	0.410426	1.53281	-0.066972	0.235588	1.22877	0.333648	1.4702	up	no change	no change	up	no change	up	0.00136617	1	2	NULL
Q9RRR0	DR_2428	2.07934	1.87107	1.45156	1.477	0.649648	1.13659	0.478921	0.905044	1.32209	2.00743	1.34826	1.87682	0.349748	0.814019	0.609594	1.28755	-0.431811	-1.14508	-1.5132	-0.04598	-1.51651	-0.811484	no change	down	down	no change	down	no change	0.118074	NULL	NULL	NULL
Q9RRR3	DR_2423	12.0001	8.57201	8.98972	12.4608	4.69728	4.16648	8.80596	4.96691	22.5165	15.5362	7.07328	7.76528	7.16961	6.38107	6.33967	4.59059	0.0603218	-1.2147	-0.578861	-1.35865	-1.48963	-1.79967	no change	down	no change	down	down	down	7.12238e-05	0	0	NULL
Q9RRR4	mscL	37.9101	24.5422	1.55401	0.235429	14.5578	18.1762	25.5267	27.5548	38.6352	45.9758	44.9794	44.9401	45.5783	25.5187	34.5398	22.4878	-5.12517	-0.931967	-0.234546	0.087788	-0.251057	-0.569183	down	no change	no change	no change	no change	no change	1.30059e-05	0	0	NULL
Q9RRR5	DR_2421	0.0276977	0.130082	0.0537913	0.0613139	0.0978612	0.0435008	NULL	NULL	0.0701171	0.359747	0.0371905	0.0289438	0.088051	NULL	0.0391207	0.0994448	-0.45496	-0.15852	-6.95451	-2.70041	-2.27709	-1.63331	no change	no change	down	down	down	down	0.078193	NULL	NULL	NULL
Q9RRR6	DR_2420	0.0827438	NULL	0.253007	0.00526029	1.23148	1.3138	0.856731	0.153831	0.0880659	NULL	0.588026	0.440484	0.0641373	0.419837	1.07407	1.18748	1.63109	4.93198	3.59932	3.53545	2.44789	4.6722	up	up	up	up	up	up	3.08379e-07	3	3	sustain_up
Q9RRR7	DR_2419	0.326923	0.162394	0.124016	0.133957	0.248974	0.152479	0.109492	0.122584	0.286523	0.171674	0.234102	0.105341	0.168464	0.138179	0.077938	0.0508606	-0.92355	-0.285538	-1.07617	-0.432803	-0.579407	-1.83085	no change	no change	down	no change	no change	down	0.314608	NULL	NULL	NULL
Q9RRR8	DR_2418	3.07549	3.51254	1.25672	0.573309	3.24978	6.67328	0.501979	1.56008	3.78092	5.39614	2.55373	1.1123	4.02889	4.10926	0.922608	1.0063	-1.84798	0.590938	-1.67576	-1.32381	-0.17333	-2.25024	down	no change	down	down	no change	down	0.0902697	NULL	NULL	NULL
Q9RRR9	DR_2416	0.431208	0.593373	0.270129	0.0594457	0.170882	0.302119	1.66124	1.2182	0.337496	0.4671	0.514908	0.5345	0.423758	0.264102	0.562668	0.333965	-1.63636	-1.11512	1.49075	0.383239	-0.226147	0.156254	down	down	up	no change	no change	no change	6.21833e-08	1	0	NULL
Q9RRS0	DR_2415	4.48962	4.0087	1.00301	0.866176	0.826452	1.05379	2.32155	3.00784	5.16155	7.7306	1.31116	3.99038	2.20454	4.85534	1.9814	3.35141	-2.18477	-2.17626	-0.673206	-1.28201	-0.868777	-1.27352	down	down	no change	down	no change	down	0.0832906	NULL	NULL	NULL
Q9RRS1	DR_2414	0.863134	NULL	0.369724	0.412816	0.594437	0.409194	0.114066	0.219202	0.464303	1.02303	0.286297	0.431953	0.0528982	0.033981	0.118127	0.0972401	-0.142483	0.216509	-1.37397	-1.05017	-4.09758	-2.78786	no change	no change	down	down	down	down	0.0220945	0	0	NULL
Q9RRS2	DR_2413	NULL	0.255216	NULL	NULL	NULL	NULL	NULL	NULL	NULL	0.0374131	NULL	0.155771	NULL	NULL	NULL	0.134269	-7.65191	-7.65191	-7.65191	2.03937	-4.90254	1.826	down	down	down	up	down	up	0.0488331	0	2	late_up
Q9RRS3	DR_2412	1.6815	1.53606	1.65034	1.15672	1.67188	1.45105	1.47577	1.66969	1.82523	2.51902	1.25501	1.18486	1.06691	1.02026	1.10429	1.16984	-0.196908	-0.0430648	-0.0326952	-0.8323	-1.05756	-0.933793	no change	no change	no change	no change	down	no change	0.000106432	0	0	NULL
Q9RRS5	dnaX	0.0488905	0.0572704	0.0223338	0.228105	0.301485	0.159345	0.459014	0.434825	0.00839154	0.0159369	0.260672	0.21279	0.0523393	0.0146116	0.408759	0.324268	1.2382	2.11798	3.07376	4.28253	1.46046	4.91315	up	up	up	up	up	up	0.000461191	3	3	sustain_up
Q9RRS7	DR_2408	1.34863	0.736899	1.55248	0.984468	1.47877	1.09999	3.25091	2.28423	1.64745	0.473614	1.32021	1.34193	2.81664	1.11317	2.06363	1.00803	0.282682	0.30626	1.40821	0.327795	0.889669	0.534228	no change	no change	up	no change	no change	no change	0.0211754	1	0	NULL
Q9RRS8	DR_2407	0.642476	0.230286	1.80112	0.141237	2.44814	2.84534	7.24914	10.6	0.28693	0.0647009	0.851083	0.797365	2.3792	2.706	2.45697	2.43133	1.15414	2.60056	4.35412	2.22897	3.85417	3.7972	up	up	up	up	up	up	4.3602e-07	3	3	sustain_up
Q9RRS9	DR_2406	8.2785	1.87841	9.14717	10.5904	8.85536	5.564	15.597	9.02838	10.7849	11.7845	5.85745	6.83193	7.20657	3.73154	6.92035	5.25427	0.95848	0.505546	1.27769	-0.830743	-1.045	-0.890487	no change	no change	up	no change	down	no change	0.000223229	1	0	NULL
Q9RRT0	menG	1.70212	2.60464	3.68199	3.33265	4.29618	3.85474	1.53342	3.15324	1.9994	0.769846	2.05519	3.71233	3.62909	3.73162	3.11801	3.83251	0.703768	0.920362	0.121959	1.05846	1.41035	1.32763	no change	no change	no change	up	up	up	0.0204808	0	3	late_up
Q9RRT1	DR_2404	0.138203	0.174757	0.197031	0.102628	0.0932579	0.0685907	0.313858	0.437414	0.0282936	0.0272492	0.124585	0.126662	0.150408	0.17661	0.123319	0.126162	-0.0626539	-0.951332	1.26336	2.17743	2.5577	2.16726	no change	no change	up	up	up	up	2.21026e-07	1	3	NULL
Q9RRT5	DR_2400	NULL	NULL	NULL	NULL	NULL	NULL	NULL	NULL	NULL	NULL	NULL	NULL	0.0388894	0.296863	0.0298861	NULL	0	0	0	0	8.044	4.58453	no change	no change	no change	no change	up	up	0.0153198	0	2	late_up
Q9RRT6	DR_2399	0.679351	0.648338	0.800678	0.751564	0.392203	0.377396	1.40779	2.06152	0.290046	0.451373	0.798775	0.731117	0.838096	0.620324	0.843614	0.706568	0.225436	-0.78674	1.38573	1.04507	0.976046	1.06408	no change	no change	up	up	no change	up	1.42263e-06	1	2	NULL
Q9RRT7	DR_2398	NULL	NULL	2.9818	NULL	0.714991	0.405376	0.694747	0.404976	NULL	NULL	NULL	0.240815	0.642996	0.537044	0.0363751	0.71408	11.195	9.7825	9.75567	7.56833	9.85736	9.20437	up	up	up	up	up	up	0.124459	NULL	NULL	NULL
Q9RRT8	surE	2.73048	4.32264	0.441882	0.0300456	0.500407	1.12268	0.106998	NULL	2.53535	3.28136	0.440069	NULL	1.43014	0.514506	0.278154	0.0815331	-3.90162	-2.11952	-6.03405	-3.72232	-1.5807	-4.01539	down	down	down	down	down	down	0.298644	NULL	NULL	NULL
Q9RRT9	DR_2396	8.75681	9.26799	11.6936	11.5502	6.89337	7.42564	12.9741	11.0716	6.06552	6.68971	7.54232	5.90237	7.25345	3.93219	5.31911	5.90816	0.366867	-0.332052	0.415799	0.0759476	-0.189443	-0.184083	no change	no change	no change	no change	no change	no change	0.000199283	0	0	NULL
Q9RRU0	DR_2395	0.0507089	0.0205165	0.116346	0.0276665	0.0656132	0.0628846	0.0510511	0.0585617	0.127727	NULL	NULL	0.0924284	0.0712927	NULL	NULL	0.0168455	1.01573	0.851278	0.621951	-0.463931	-0.835592	-2.87632	up	no change	no change	no change	no change	down	0.309533	NULL	NULL	NULL
Q9RRU1	DR_2394	NULL	NULL	NULL	NULL	0.0228919	0.0133197	0.00258818	0.00328869	NULL	0.0105532	NULL	NULL	NULL	0.00987652	NULL	NULL	0	4.83113	2.20779	-3.13678	-0.0899922	-3.13678	no change	up	up	down	no change	down	0.000612461	2	0	early_up
Q9RRU4	DR_2391	2.06515	1	0.625629	0.551167	1.64987	0.916648	0.986396	0.865533	1.61715	0.565675	1.13703	0.945243	0.903903	0.590993	1.46989	0.545122	-1.38109	-0.256143	-0.726929	-0.0680398	-0.546155	-0.115414	down	no change	no change	no change	no change	no change	0.0788606	NULL	NULL	NULL
Q9RRU5	thrB	0.00270103	NULL	NULL	NULL	0.186695	0.248954	NULL	0.10726	NULL	NULL	NULL	NULL	0.129012	0.0244853	NULL	NULL	-1.39134	7.02843	5.01491	0	6.91481	0	down	up	up	no change	up	no change	0.00165528	2	1	NULL
Q9RRU8	luxS	0.022249	0.085054	0.937623	0.602289	6.19614	4.90012	1.03797	0.26116	0.0658208	0.127701	3.18942	2.05797	0.492157	0.487452	5.17976	3.84786	3.84309	6.69224	3.59778	4.76104	2.33971	5.54378	up	up	up	up	up	up	2.08411e-11	3	3	sustain_up
Q9RRU9	DR_2386	0.323082	0.199565	0.133862	0.0872359	1.23572	1.00947	0.809923	0.742831	0.189026	0.0733279	0.248909	0.0325295	0.507437	0.423274	0.593766	0.440311	-1.24115	2.10293	1.57092	0.10131	1.82682	1.97876	down	up	up	no change	up	up	2.62597e-06	2	2	sustain_up
Q9RRV0	DR_2385	NULL	NULL	NULL	NULL	NULL	0.0711978	NULL	NULL	NULL	NULL	NULL	0.0225108	NULL	NULL	0.0533926	0.0333181	0	5.81934	0	4.18549	0	6.09088	no change	up	no change	up	no change	up	0.00135656	1	2	NULL
Q9RRV1	DR_2384	0.326887	0.292496	2.63334	0.91417	1.75041	1.60751	1.86849	1.70253	0.0757751	0.140842	0.883019	2.39093	2.24817	1.30227	2.05654	0.852076	2.5179	2.43867	2.52743	3.91781	4.03478	3.74711	up	up	up	up	up	up	0.893757	NULL	NULL	NULL
Q9RRV2	DR_2383	NULL	NULL	NULL	NULL	0.184602	0.370199	0.148968	0.0521006	NULL	NULL	0.102453	0.128365	0.0443861	0.00095856	0.0811958	0.0355325	0	8.76857	7.30429	7.50336	5.1556	6.51976	no change	up	up	up	up	up	4.09382e-06	2	3	sustain_up
Q9RRV3	DR_2382	0.363897	0.833549	0.0664115	0.0562046	0.606029	0.785452	0.986127	0.667876	0.228044	0.349255	0.3768	0.540058	1.12938	1.11973	0.0943316	0.688637	-3.28774	0.216661	0.466001	0.667379	1.96196	0.439635	down	no change	no change	no change	up	no change	0.00012598	0	1	NULL
Q9RRV4	DR_2381	0.393762	0.505668	0.903728	1.01082	4.46263	3.47984	4.65931	4.35605	0.373996	0.141292	0.871333	0.67639	2.79771	2.01894	1.9758	0.882549	1.08992	3.1425	3.3253	1.5867	3.22458	2.47173	up	up	up	up	up	up	7.26329e-07	3	3	sustain_up
Q9RRV6	DR_2379	0.0692074	0.101638	0.0803575	0.091682	0.0106503	0.0291132	0.132693	0.187705	0.0123652	0.0302768	0.0188502	0.0279314	0.0219744	0.032526	0.0270022	0.00679002	0.0100484	-2.10317	0.907174	0.133666	0.353993	-0.335584	no change	down	no change	no change	no change	no change	4.15473e-07	0	0	NULL
Q9RRV7	DR_2378	3.3524	1.44627	12.0883	12.8789	3.91417	NULL	4.90604	7.73273	3.65871	NULL	5.70937	8.12379	2.79839	NULL	4.1172	3.0647	2.37933	-0.293695	1.39715	1.91847	-0.386663	0.972781	up	no change	up	up	no change	no change	0.0138314	2	1	NULL
Q9RRV8	DR_2377	29.0808	41.3566	45.0257	54.6883	58.1469	26.0693	1.82068	9.37693	2.79097	63.2068	30.846	60.0123	29.6538	22.8241	33.5979	36.5222	0.501454	0.257755	-2.65315	0.461201	-0.330706	0.0874116	no change	no change	down	no change	no change	no change	0.0574872	NULL	NULL	NULL
Q9RRV9	DR_2376	4.91256	2.76708	3.26804	1.89739	2.96713	2.28802	5.431	1.95657	2.85815	0.159033	2.08937	0.355477	3.25814	0.949249	2.33644	1.09678	-0.572149	-0.547304	-0.0559384	-0.303459	0.479723	0.18636	no change	no change	no change	no change	no change	no change	0.495502	NULL	NULL	NULL
Q9RRW0	DR_2375	0.144099	NULL	1.30166	1.12587	1.24498	0.95322	0.095569	0.141125	0.159851	0.598129	1.18586	0.723211	1.23589	1.2948	0.800063	0.698925	4.068	3.92484	0.709604	1.33264	1.7393	0.983758	up	up	no change	up	up	no change	0.000260501	2	2	sustain_up
Q9RRW1	DR_2374	1.11484	1.14817	1.62842	1.25042	1.60631	1.79309	1.14215	1.30678	1.34446	0.638746	1.12755	1.00855	1.77986	1.21951	0.541039	0.456576	0.347249	0.587041	0.113915	0.107145	0.596829	-0.991276	no change	no change	no change	no change	no change	no change	0.051693	NULL	NULL	NULL
Q9RRW2	DR_2373	39.884	41.9874	27.5612	26.834	27.6043	24.4158	9.34745	9.25536	38.4096	45.568	17.6736	23.9081	19.9579	26.9206	20.185	8.82908	-0.589878	-0.654288	-2.13784	-1.01406	-0.841081	-1.53325	no change	no change	down	down	no change	down	0.0228677	0	0	NULL
Q9RRW3	pth	0.519465	NULL	0.313427	0.25696	0.845903	1.00558	0.470697	0.247973	1.45515	3.28658	1.97431	0.317144	1.00947	1.11341	0.750831	0.14508	0.133147	1.83182	0.466536	-1.04915	-1.15939	-2.40399	no change	up	no change	down	down	down	0.00515741	1	0	NULL
Q9RRW5	DR_2370	4.40851	2.8413	6.79805	6.97851	15.7889	13.4071	8.41436	5.37183	3.85151	3.8783	8.06139	9.30106	8.89232	6.96491	12.4242	12.8739	0.926202	2.00976	0.92721	1.16746	1.03664	1.71052	no change	up	no change	up	up	up	1.00054e-08	1	3	NULL
Q9RRW7	DR_2368	NULL	NULL	NULL	NULL	NULL	NULL	0.207275	0.169979	NULL	NULL	NULL	0.088353	NULL	NULL	NULL	0.0907894	0	0	8.21214	6.1283	0	6.16727	no change	no change	up	up	no change	up	1.83617e-05	1	2	NULL
Q9RRW8	DR_2367	2.59082	2.42445	3.4508	3.13971	2.24832	3.81215	0.886323	2.18903	4.4138	23.6432	13.9461	3.93461	5.40972	2.34247	5.29677	3.43371	0.394063	0.273102	-0.705576	-0.64996	-1.85568	-1.68423	no change	no change	no change	no change	down	down	0.137015	NULL	NULL	NULL
Q9RRW9	DR_2363	0.0732542	0.22788	0.225667	0.0500258	0.034196	1.37442	12.1002	0.191147	0.576855	0.385609	0.0244823	0.0593112	0.182248	14.327	6.54893	15.2631	-0.127346	2.2258	5.3511	-3.52182	3.9141	4.50225	no change	up	up	down	up	up	0.330107	NULL	NULL	NULL
Q9RRX0	DR_2362	3.35841	3.56943	2.41466	4.50357	1.97193	3.59029	2.85811	4.15525	3.09703	4.24447	4.31344	4.3826	2.93451	4.02653	3.53992	3.93246	-0.00200125	-0.316743	0.0177026	0.244283	-0.0767722	0.0254917	no change	no change	no change	no change	no change	no change	0.692708	NULL	NULL	NULL
Q9RRX1	DR_2361	65.8027	52.245	59.1461	43.8049	42.8215	44.7235	59.3367	53.5664	54.2134	58.878	50.034	47.3841	30.7086	34.0026	33.3212	41.5325	-0.197412	-0.431274	-0.0642854	-0.215226	-0.805403	-0.595343	no change	no change	no change	no change	no change	no change	0.00971269	0	0	NULL
Q9RRX3	DR_2359	10.6977	10.3038	6.46895	6.45329	4.21815	2.96042	1.44468	0.590421	5.74544	11.6102	4.49914	3.93804	5.58663	4.84815	2.06999	2.19672	-0.700639	-1.54873	-3.36732	-1.04057	-0.734004	-2.02421	no change	down	down	down	no change	down	0.0122863	0	0	NULL
Q9RRX5	pheT	5.55827	4.41535	4.55112	4.01509	6.59303	4.76243	3.08858	3.8748	6.33084	6.33425	6.17961	6.37291	6.011	5.70732	4.71124	5.57403	-0.219461	0.187198	-0.518329	-0.0128793	-0.112091	-0.300278	no change	no change	no change	no change	no change	no change	0.0162352	0	0	NULL
Q9RRX6	DR_2356	1.35499	1.20329	2.2898	2.6781	2.69273	5.50709	1.82745	0.883181	2.08643	5.59176	3.33798	3.67538	4.12805	5.27933	1.82228	1.15286	0.957462	1.68042	0.0834526	-0.130661	0.293028	-1.36781	no change	up	no change	no change	no change	down	0.117083	NULL	NULL	NULL
Q9RRX7	DR_2355	0.175496	0.130225	0.299344	NULL	0.535605	0.145296	0.471619	0.452257	0.456047	0.717495	0.59635	0.422939	4.38182	4.63315	0.465249	0.533005	-0.0273468	1.15523	1.59549	-0.203307	2.94145	-0.233391	no change	up	up	no change	up	no change	1.2527e-15	2	1	NULL
Q9RRX8	pheS	6.28928	9.37538	4.40198	5.28384	9.19303	8.19637	4.61512	4.37188	8.76338	6.42153	8.52203	7.0452	6.43762	2.70332	10.4489	9.03681	-0.693568	0.150694	-0.801602	0.0358742	-0.732223	0.359776	no change	no change	no change	no change	no change	no change	5.21348e-06	0	0	NULL
Q9RRX9	ansA	0.161989	0.0973629	NULL	NULL	0.289247	0.24505	0.212102	0.14035	0.101935	0.0342142	0.0705807	0.147198	0.196083	0.191228	0.194249	0.183875	-7.67151	1.04273	0.442517	0.677678	1.50831	1.47368	down	up	no change	no change	up	up	5.77265e-05	1	2	NULL
Q9RRY0	hemC	9.56558	7.51172	10.9173	9.90872	7.92405	6.78307	0.662388	0.717682	6.97452	3.12145	4.63921	6.97411	3.56125	2.9351	5.02391	5.46918	0.28631	-0.215566	-3.62927	0.202	-0.636077	0.0556601	no change	no change	down	no change	no change	no change	4.47744e-07	0	0	NULL
Q9RRY1	DR_2351	NULL	NULL	NULL	NULL	NULL	NULL	NULL	NULL	NULL	NULL	NULL	NULL	NULL	0.66688	NULL	NULL	0	0	0	0	9.0354	0	no change	no change	no change	no change	up	no change	0.0615447	NULL	NULL	NULL
Q9RRY2	DR_2350	0.12542	NULL	0.629073	0.70837	0.741292	0.175575	0.463971	0.146792	0.36776	0.231547	0.680794	0.778551	0.891441	0.609175	0.730197	0.584381	3.40733	2.86264	2.27654	1.28395	1.32419	1.13323	up	up	up	up	up	up	0.302116	NULL	NULL	NULL
Q9RRY3	DR_2349	0.0267529	0.0261123	0.168773	NULL	0.0810228	0.493721	0.214861	0.24612	NULL	0.18433	0.434186	0.405626	0.847494	1.20113	0.279756	0.671424	1.68012	3.44253	3.12432	2.1828	3.46932	2.36246	up	up	up	up	up	up	0.00230312	3	3	sustain_up
Q9RRY4	DR_2348	0.344329	0.335737	0.305549	0.0977402	0.209347	0.26218	0.596518	0.421457	0.220697	0.00389615	0.489495	0.147075	0.238687	0.167955	0.463234	0.254336	-0.753861	-0.528336	0.581956	1.503	0.85644	1.6758	no change	no change	no change	up	no change	up	0.03309	0	2	late_up
Q9RRY5	DR_2347	NULL	NULL	0.120938	NULL	0.125739	0.0813872	NULL	NULL	NULL	NULL	NULL	NULL	0.0448098	NULL	0.150598	0.0413822	6.57844	7.34711	0	0	5.15882	7.23756	up	up	no change	no change	up	up	0.000639257	2	2	sustain_up
Q9RRY6	DR_2346	3.54743	0.692517	8.44686	13.2543	9.3286	7.30631	3.9153	1.29403	9.09301	2.38939	7.19254	10.8883	3.83215	1.13583	3.44185	3.57579	2.35565	1.97209	0.297051	0.655039	-1.20869	-0.710366	up	up	no change	no change	down	no change	0.00278853	2	0	early_up
Q9RRY7	DR_2345	0.0205643	0.177462	0.154242	0.0695753	0.177809	0.104858	0.150667	0.0805187	0.122511	0.0467571	0.0690959	0.0399265	0.125	0.109395	0.0200663	0.0292576	0.17663	0.51341	0.223358	-0.63469	0.469628	-1.77896	no change	no change	no change	no change	no change	down	0.346805	NULL	NULL	NULL
Q9RRY8	DR_2344	183.689	173.058	135.239	367.449	0.204839	433.098	158.022	167.395	265.67	260.922	0.0912194	134.806	0.0263071	227.054	0.0707547	332.397	0.494764	0.280475	-0.132608	-1.96482	-1.21348	-0.663471	no change	no change	no change	down	down	no change	0.23168	NULL	NULL	NULL
Q9RRY9	DR_2343	0.796572	0.556997	0.731905	0.611881	0.637999	NULL	NULL	1.25884	0.689413	0.955683	0.747629	0.782718	1.08097	0.56222	0.566528	0.513408	-0.0104656	-1.0837	-0.103949	-0.104313	-0.00166821	-0.607226	no change	down	no change	no change	no change	no change	0.332805	NULL	NULL	NULL
Q9RRZ0	DR_2342	2.07345	1.6134	0.0246381	0.602164	0.423724	1.86447	1.76796	3.7792	1.34094	0.803557	1.93857	1.27654	1.69672	1.69505	2.75192	1.78371	-2.55631	-0.688182	0.589358	0.584231	0.661403	1.08067	down	no change	no change	no change	no change	up	0.0100904	0	1	NULL
Q9RRZ1	DR_2341	0.483863	0.373126	0.162147	0.301752	0.625817	0.385841	0.55851	0.636649	1.0612	1.12945	0.25294	0.464587	1.08066	0.592431	0.457165	0.34876	-0.885465	0.239374	0.479855	-1.61026	-0.388846	-1.44264	no change	no change	no change	down	no change	down	4.70718e-05	0	0	NULL
Q9RRZ3	DR_2336	NULL	NULL	0.0427695	0.0627788	0.063334	0.0589227	NULL	0.162243	0.280745	NULL	NULL	0.0399773	NULL	0.0675791	NULL	0.0379364	6.3745	6.58651	7.0004	-2.7925	-2.04436	-2.86688	up	up	up	down	down	down	0.0372604	3	0	early_up
Q9RRZ4	DR_2335	9.77115	12.2735	10.1842	10.2937	11.3605	9.84211	6.93786	6.09638	10.6794	10.5153	9.35086	7.07277	6.409	5.61541	8.76265	5.95094	-0.106358	-0.056188	-0.758123	-0.367927	-0.817736	-0.526551	no change	no change	no change	no change	no change	no change	0.000298543	0	0	NULL
Q9RRZ5	DR_2334	0.459111	0.802488	0.571288	0.606515	0.383726	0.205978	0.379655	0.76592	0.929803	0.901403	0.197479	0.547253	0.567633	0.915281	0.341539	0.555476	-0.0991554	-1.09719	-0.139181	-1.298	-0.304359	-1.02959	no change	down	no change	down	no change	down	0.00150481	0	0	NULL
Q9RRZ6	DR_2333	0.247083	0.294807	0.377099	0.549025	0.720128	0.228277	0.237969	0.120349	0.400236	0.349341	0.671509	0.285258	0.396647	0.175392	0.352657	0.352941	0.773205	0.807503	-0.596758	0.352091	-0.389966	-0.0872304	no change	no change	no change	no change	no change	no change	0.10399	NULL	NULL	NULL
Q9RRZ7	DR_2332	0.218679	0.0447115	0.0971354	0.334119	0.507172	0.110777	0.698052	0.310755	0.049802	0.0372453	1.84172	0.133225	0.227486	0.137396	0.14475	0.468498	0.711336	1.23028	1.93738	4.50387	2.06756	2.8166	no change	up	up	up	up	up	0.0657236	NULL	NULL	NULL
Q9RRZ8	DR_2331	5.21132	5.21695	4.5059	3.65167	2.83353	1.87552	3.54902	3.71288	6.01025	6.08478	3.31336	3.93308	3.36744	4.3718	2.86189	2.25682	-0.354287	-1.14699	-0.522082	-0.73907	-0.64415	-1.24056	no change	down	no change	no change	no change	down	1.38705e-05	0	0	NULL
Q9RS00	DR_2329	0.69608	1.06151	1.82353	1.30107	0.74539	0.855071	0.70347	0.870582	0.512386	0.533221	0.953016	0.442408	0.603872	0.571052	1.11473	0.915668	0.830071	-0.135111	-0.159115	0.416362	0.168225	0.957419	no change	no change	no change	no change	no change	no change	0.000146812	0	0	NULL
Q9RS01	DR_2328	0.0495526	0.0754911	0.173546	0.0769231	0.0487299	0.162892	0.0576496	0.673268	0.0491699	0.0714638	0.0843399	0.0801471	0.0550122	0.10649	0.098961	0.0362413	1.0022	0.759057	2.54728	0.44734	0.420919	0.164487	up	no change	up	no change	no change	no change	0.122808	NULL	NULL	NULL
Q9RS02	DR_2327	0.0507619	NULL	NULL	NULL	0.369299	0.292961	0.0842128	0.167273	0.412542	0.100204	0.282967	0.111169	NULL	0.120484	0.214194	0.207506	-5.33638	3.68761	2.29069	-0.379549	-2.0818	-0.282027	down	up	up	no change	down	no change	4.36329e-05	2	0	early_up
Q9RS03	DR_2326	1.35199	1.71467	0.76979	2.21082	1.5941	2.43479	0.394912	8.83181	0.422939	0.606599	0.505303	0.677493	0.0738371	0.296407	0.546573	1.14923	-0.0410605	0.393713	1.58915	0.200205	-1.47545	0.719973	no change	no change	up	no change	down	no change	0.366974	NULL	NULL	NULL
Q9RS04	DR_2325	0.0771655	0.0284803	NULL	NULL	NULL	NULL	0.083006	0.0297039	0.0759108	0.211484	0.0546804	0.0331503	0.018156	0.00663563	0.0804069	0.0270477	-6.37583	-6.37583	0.09338	-1.71024	-3.53511	-1.41931	down	down	no change	down	down	down	0.0588286	NULL	NULL	NULL
Q9RS05	DR_2322	0.180897	0.111418	NULL	0.924844	0.242777	NULL	0.0373322	0.246174	0.344214	0.0685434	0.44151	0.708932	0.126066	0.062492	0.160326	0.111082	1.66267	-0.264123	-0.0441476	1.47882	-1.13029	-0.604831	up	no change	no change	up	down	no change	0.911484	NULL	NULL	NULL
Q9RS06	DR_2321	NULL	NULL	3.77466	4.3049	0.0936453	4.35375	2.25937	1.89191	0.167569	8.2734	5.66334	5.44091	2.73033	2.30203	4.39832	5.61681	12.6328	11.7715	11.6721	0.395632	-0.746175	0.246701	up	up	up	no change	no change	no change	0.223611	NULL	NULL	NULL
Q9RS07	DR_2320	0.796336	2.22844	0.732014	0.632639	1.28484	2.10391	0.60797	0.720918	2.53183	2.11899	0.985352	0.754711	2.01706	1.00424	0.940524	2.09273	-1.14829	0.163928	-1.18661	-1.41835	-0.622317	-0.616621	down	no change	down	down	no change	no change	0.118014	NULL	NULL	NULL
Q9RS08	DR_2319	1.14947	1.57058	0.0388815	0.0277821	6.99077	4.8087	0.180531	0.35362	4.13014	2.75321	0.470525	1.00542	7.15113	6.60206	1.96344	2.91939	-5.35059	2.11701	-2.34832	-2.22147	0.998584	-0.495393	down	up	down	down	no change	no change	0.0496104	1	0	NULL
Q9RS09	DR_2318	0.771066	0.485251	1.29598	0.294104	1.36587	2.57601	1.38869	0.988382	0.611075	0.213299	1.32449	0.339979	0.905053	0.740649	1.31598	2.00879	0.339899	1.64968	0.919983	1.01369	0.997333	2.01188	no change	up	no change	up	no change	up	0.0107762	1	2	NULL
Q9RS10	DR_2317	52.1179	55.0343	18.7202	21.4781	12.3491	18.1692	13.1063	17.3783	41.116	37.7545	15.6137	22.7173	18.5385	20.1726	14.0876	17.6026	-1.41446	-1.81192	-1.81351	-1.04097	-1.02674	-1.31545	down	down	down	down	down	down	8.35492e-06	0	0	NULL
Q9RS11	DR_2316	2.5206	2.02148	0.621419	0.758778	1.73063	1.36146	3.61808	3.53233	1.93196	1.22823	2.63509	2.82145	3.43775	1.68986	2.31644	2.06104	-1.71848	-0.554773	0.654673	0.787976	0.698276	0.47009	down	no change	no change	no change	no change	no change	1.06237e-06	0	0	NULL
Q9RS12	DR_2315	0.115589	0.0939034	0.0482107	NULL	0.113619	0.517001	0.753584	0.518065	0.204125	0.0630954	0.757874	0.213623	0.6075	0.292491	1.26718	0.408466	-2.10056	1.58987	2.60173	1.86218	1.75188	2.64861	down	up	up	up	up	up	0.347399	NULL	NULL	NULL
Q9RS13	DR_2314	NULL	NULL	0.0434562	0.0170144	0.719763	0.532716	NULL	NULL	1.646	1.01575	0.176472	0.517536	1.58165	1.93818	0.310077	0.420583	5.5709	9.94332	0	-1.93935	0.403133	-1.8651	up	up	no change	down	no change	down	1.63164e-05	2	0	early_up
Q9RS15	DR_2312	0.259194	0.335017	0.657501	0.792713	1.04168	0.970882	2.06675	2.65709	NULL	0.488133	0.511826	0.0748031	0.955828	1.4833	2.38907	1.51635	1.28722	1.75999	2.99092	0.263295	2.31914	2.99825	up	up	up	no change	up	up	0.0980389	NULL	NULL	NULL
Q9RS16	psuG	6.32816	5.57602	7.50164	5.79698	12.4709	14.0813	23.1928	27.4577	7.80061	5.69968	8.37676	8.36525	15.3047	15.3672	18.0237	13.6904	0.159808	1.15736	2.08911	0.310482	1.18393	1.23214	no change	up	up	no change	up	up	6.91942e-07	2	2	sustain_up
Q9RS17	DR_2310	9.08432	11.4633	8.99191	8.60213	7.16591	7.08196	18.8121	18.1504	10.817	11.773	10.1685	11.4062	8.27864	7.14234	8.24388	7.8721	-0.223887	-0.528227	0.847089	-0.0663517	-0.550794	-0.487197	no change	no change	no change	no change	no change	no change	3.56755e-12	0	0	NULL
Q9RS18	DR_2309	NULL	NULL	0.0806035	0.0579809	0.140539	0.181108	NULL	NULL	NULL	NULL	NULL	0.153865	NULL	NULL	NULL	NULL	6.76737	7.98208	0	6.92422	0	0	up	up	no change	up	no change	no change	0.000187285	2	1	NULL
Q9RS19	der	11.4134	7.86175	16.2415	15.3022	17.7323	14.2425	9.05961	12.4996	10.9849	10.1996	14.233	16.8543	22.3587	21.5933	13.0488	11.2771	0.710608	0.730192	0.161562	0.553316	1.05292	0.199484	no change	no change	no change	no change	up	no change	0.00260055	0	1	NULL
Q9RS22	DR_2305	0.0497882	0.053762	0.0339952	0.0822746	0.211031	0.129584	0.04569	0.00525418	0.00780514	0.054812	0.0454356	0.0423368	0.0680361	0.0213531	0.0214604	0.0505634	0.167145	1.71781	-1.02334	0.48721	0.513544	0.201918	no change	up	down	no change	no change	no change	0.00036372	1	0	NULL
Q9RS24	DR_2303	0.0885695	0.154754	0.161169	0.136827	0.214441	0.593927	NULL	NULL	0.252917	0.191758	0.0882739	0.13833	0.561007	0.66708	0.574175	1.34318	0.292417	1.73213	-7.57948	-0.972578	1.46559	2.10829	no change	up	down	no change	up	up	0.000181738	1	2	NULL
Q9RS25	DR_2302	3.31623	1.50146	2.73584	2.12146	1.14191	0.839979	0.204047	0.198662	4.12442	2.1472	2.13171	3.01492	1.37774	0.502158	1.59209	2.222	0.0118118	-1.28146	-3.58053	-0.285208	-1.73818	-0.717497	no change	down	down	no change	down	no change	0.0561484	NULL	NULL	NULL
Q9RS26	DR_2301	0.229859	0.24356	NULL	NULL	NULL	NULL	NULL	NULL	0.612331	0.0962683	0.0231104	0.100383	0.162616	0.189226	0.00953633	0.120567	-8.53972	-8.53972	-8.53972	-2.52054	-1.01004	-2.44531	down	down	down	down	down	down	0.696455	NULL	NULL	NULL
Q9RS27	alaS	6.66451	8.08333	6.85272	6.71895	8.85817	8.52868	6.40444	6.79396	7.34787	7.0561	7.44027	6.57944	5.11629	4.66113	6.0736	7.12513	-0.119904	0.237493	-0.16014	-0.0390105	-0.558942	-0.126068	no change	no change	no change	no change	no change	no change	1.18931e-07	0	0	NULL
Q9RS28	DR_2299	0.0611375	0.137076	0.29701	0.153581	0.124734	0.0867335	0.217309	0.234114	0.202402	0.273078	0.194353	0.170369	0.113339	0.0580683	0.286505	0.111755	1.18476	0.093381	1.18743	-0.382586	-1.47195	-0.255674	up	no change	up	no change	down	no change	0.011213	2	0	early_up
Q9RS29	DR_2298	4.13966	10.4058	9.66871	16.9209	17.2058	9.09855	9.0523	2.80999	11.0221	15.5355	8.86941	8.24759	9.60065	9.08967	5.51987	7.91848	0.870295	0.854734	-0.294183	-0.633692	-0.50683	-0.982766	no change	no change	no change	no change	no change	no change	0.0105339	0	0	NULL
Q9RS30	DR_2297	1.5032	2.91008	NULL	0.312654	1.96416	1.91481	0.705277	NULL	3.04542	4.72614	0.280674	0.501002	2.50518	3.41208	1.48392	0.603194	-3.81628	-0.186177	-2.64429	-3.31356	-0.393273	-1.8967	down	no change	down	down	no change	down	0.0950148	NULL	NULL	NULL
Q9RS31	DR_2296	0.796748	0.602841	0.130593	0.0582628	0.599068	0.653631	0.720034	0.821609	1.83262	1.48277	0.275279	0.909024	0.403475	1.61165	0.701697	0.612536	-2.88965	-0.159963	0.139465	-1.48514	-0.718308	-1.33496	down	no change	no change	down	no change	down	0.0174065	0	0	NULL
Q9RS32	DR_2295	0.872854	0.328417	1.6698	0.434516	0.357369	0.681207	1.13616	1.45463	0.366534	0.67085	1.40753	0.48581	1.41925	1.13243	1.50936	0.809452	0.808791	-0.209953	1.10883	0.867985	1.2985	1.16044	no change	no change	up	no change	up	up	0.0932956	NULL	NULL	NULL
Q9RS33	DR_2294	29.3588	33.5329	25.217	18.1921	8.18986	2.55379	46.7123	42.604	40.1256	23.3668	33.6207	26.1039	24.1774	26.4047	27.3177	18.3731	-0.534871	-2.54939	0.506053	-0.0882597	-0.327958	-0.474678	no change	down	no change	no change	no change	no change	1.45249e-06	0	0	NULL
Q9RS36	DR_2291	NULL	NULL	NULL	NULL	0.0335083	0.134343	NULL	NULL	0.358962	0.4026	0.141121	0.322868	NULL	0.205503	0.295803	0.329164	0	7.04378	0	-0.714869	-1.88534	-0.285182	no change	up	no change	no change	down	no change	0.000128254	1	0	NULL
Q9RS37	truA	0.263723	0.454204	0.386945	0.252948	0.566761	0.245072	0.707736	0.564586	0.756143	0.667707	0.176668	0.796507	0.125899	0.821571	0.126233	0.365516	-0.166006	0.177346	0.825555	-0.549026	-0.587644	-1.5338	no change	no change	no change	no change	no change	down	0.02077	0	0	NULL
Q9RS38	gmk	0.666392	0.42126	0.016792	0.00868679	1.79423	1.58335	0.122536	0.128756	1.48771	0.483777	0.647377	0.9833	5.1848	3.16832	2.14536	1.97815	-5.41577	1.63477	-2.11378	-0.273816	2.08303	1.06459	down	up	down	no change	up	up	0.00151722	1	2	NULL
Q9RS39	DR_2288	0.157323	0.395494	0.6089	NULL	0.794819	0.904972	0.660812	0.0442855	0.0111763	NULL	0.118065	0.00335511	0.0997228	0.236873	0.248149	0.226289	0.140909	1.62048	0.351021	3.36164	4.83264	5.32785	no change	up	no change	up	up	up	0.0437477	1	3	NULL
Q9RS40	DR_2287	3.39051	0.115238	6.62803	0.140869	8.26789	5.91063	16.8076	0.462077	0.347782	1.32179	2.46524	2.33436	7.8358	0.224708	0.235499	0.0627168	0.949199	2.01591	2.30044	1.52344	2.2714	-2.48505	no change	up	up	up	up	down	0.233207	NULL	NULL	NULL
Q9RS41	DR_2286	4.12753	1.42507	0.354866	1.91564	2.25004	1.32705	2.19757	2.22707	6.68308	4.52594	5.40041	2.79332	4.36221	1.51475	2.82791	3.41085	-1.29015	-0.634376	-0.327602	-0.452069	-0.93152	-0.84533	down	no change	no change	no change	no change	no change	0.17913	NULL	NULL	NULL
Q9RS43	DR_2284	0.463906	0.454992	0.311409	0.0393176	0.391473	0.209844	0.154886	0.353032	0.308175	0.0822412	0.280538	0.254579	0.143715	0.251111	0.227682	0.267273	-1.38956	-0.611779	-0.855308	0.454841	0.0162003	0.342283	down	no change	no change	no change	no change	no change	0.010374	0	0	NULL
Q9RS44	DR_2283	0.0382358	0.0378488	0.111989	0.114796	0.101563	NULL	0.173414	NULL	NULL	0.0508845	0.0471205	NULL	NULL	NULL	0.104023	NULL	1.57565	0.425711	1.19382	-0.109451	-5.33982	1.02247	up	no change	up	no change	down	up	0.452904	NULL	NULL	NULL
Q9RS46	DR_2281	1.12756	1.29335	0.673628	0.668907	8.73354	0.960527	0.0944314	1.23383	0.805236	2.01236	0.0247781	1.38238	0.527202	0.774776	5.32712	2.89235	-0.850587	2.00156	-0.866002	-1.00168	-1.11376	1.54458	no change	up	no change	down	down	up	0.00403478	1	1	NULL
Q9RS47	DR_2280	0.293712	0.352022	0.442713	0.270902	NULL	NULL	0.666039	0.528751	NULL	NULL	NULL	0.442819	NULL	0.365921	0.368922	0.486364	0.144205	-8.98754	0.887746	8.44539	8.17064	9.39301	no change	down	no change	up	up	up	0.00883242	0	3	late_up
Q9RS49	DR_2278	9.43422	9.81717	8.39055	8.49614	7.2824	6.36667	3.14973	2.80514	10.209	9.89608	6.28207	7.56488	4.69711	2.45684	5.6563	4.75749	-0.189076	-0.496159	-1.69282	-0.537994	-1.49075	-0.949068	no change	no change	down	no change	down	no change	6.53093e-07	0	0	NULL
Q9RS50	DR_2277	2.1637	0.952151	1.51547	0.656364	0.938333	1.72321	3.71116	1.62934	1.37732	1.92294	2.17885	2.52312	1.12578	1.83887	3.07868	2.22811	-0.52071	-0.22736	0.77735	0.510689	-0.154714	0.685261	no change	no change	no change	no change	no change	no change	0.161512	NULL	NULL	NULL
Q9RS52	uvrB	0.655848	0.445395	1.17226	0.831505	1.14643	1.24837	2.91983	1.16413	0.531179	0.699911	0.773362	0.6186	1.83699	1.40661	0.922341	1.20658	0.863581	1.12077	1.89084	0.177183	1.39766	0.790189	no change	up	up	no change	up	no change	0.0141205	2	1	NULL
Q9RS53	DR_2274	0.0286508	0.176449	NULL	NULL	0.126904	0.0299313	0.0808539	0.197735	NULL	NULL	0.0544963	0.0366036	0.211124	0.0529252	0.251329	0.349708	-7.33293	-0.38708	0.44181	6.16212	7.69741	8.88405	down	no change	no change	up	up	up	0.00321512	0	3	late_up
Q9RS55	DR_2272	0.138044	0.0439958	NULL	0.127243	0.487664	0.291815	0.15584	0.093485	0.283518	0.361976	0.194569	0.241489	0.0980686	0.33089	0.0620761	0.165944	-0.509469	2.09826	0.453773	-0.565882	-0.589564	-1.50124	no change	up	no change	no change	no change	down	0.000330903	1	0	NULL
Q9RS56	DR_2271	0.667393	0.509359	0.711131	0.174317	0.441379	0.329529	0.989739	0.790382	0.279061	0.148456	0.501741	0.31924	0.44296	0.932105	0.712257	0.383937	-0.410331	-0.61018	0.597165	0.941367	1.68545	1.35845	no change	no change	no change	no change	up	up	0.0050588	0	2	late_up
Q9RS57	plsY2	0.148087	NULL	0.279718	0.479772	0.80919	0.275369	0.492948	0.806657	1.30134	0.42704	0.952015	0.998131	0.956955	0.325671	1.95919	0.778881	2.3524	2.86641	3.12737	0.17416	-0.430321	0.663739	up	up	up	no change	no change	no change	0.239587	NULL	NULL	NULL
Q9RS59	DR_2268	0.437422	0.338136	0.322349	0.467898	0.596598	0.53257	0.802736	1.19016	0.493578	0.513602	0.49926	0.805945	1.03847	1.47538	0.678513	1.05974	0.0270677	0.541952	1.36156	0.373953	1.31958	0.787315	no change	no change	up	no change	up	no change	0.000888656	1	1	NULL
Q9RS62	DR_2265	0.437228	0.619554	0.563689	0.530438	0.230028	0.286711	1.04496	1.08407	0.465072	0.417155	0.571377	0.503453	0.419499	0.343023	0.708033	0.368423	0.0501024	-1.03217	1.01052	0.284887	-0.210373	0.287066	no change	down	up	no change	no change	no change	5.21972e-06	1	0	NULL
Q9RS63	DR_2264	0.0188561	0.00428118	0.0127384	0.0384446	0.256617	0.136921	0.068045	0.349561	0.00750616	0.0263279	0.102369	0.0640968	0.061052	0.0330123	0.0806715	0.0958324	1.14545	4.08821	4.17385	2.29868	1.47517	2.38315	up	up	up	up	up	up	0.0136802	3	3	sustain_up
Q9RS64	dps1	121.209	126.262	142.806	163.541	195.183	203.081	59.0408	202.177	108.306	134.307	143.867	170.688	146.505	191.76	104.36	127.403	0.307903	0.686465	0.07799	0.374653	0.479494	-0.0660073	no change	no change	no change	no change	no change	no change	0.73218	NULL	NULL	NULL
Q9RS66	DR_2261	1.39876	0.728539	0.157583	0.155915	5.01221	3.21257	0.720802	1.005	0.804985	0.908117	0.622804	0.530461	6.59154	5.96667	4.7241	5.41562	-2.7625	1.95096	-0.301754	-0.570887	2.87395	2.56534	down	up	no change	no change	up	up	1.0752e-07	1	2	NULL
Q9RS67	ftsY	0.170441	0.0604377	0.396835	0.493147	0.811772	2.56859	0.906076	1.60841	0.0296638	0.0416998	0.658182	0.545727	2.09281	1.90185	1.53456	1.66757	1.94664	3.87197	3.44505	4.07639	5.80674	5.4877	up	up	up	up	up	up	0.697982	NULL	NULL	NULL
Q9RS70	DR_2257	0.301505	0.488833	0.715887	0.31721	0.817161	0.462363	2.6419	2.63881	0.785237	0.34537	0.320439	0.268803	2.1265	2.47015	1.53126	1.61234	0.386434	0.695066	2.74019	-0.940165	2.02348	1.47532	no change	no change	up	no change	up	up	1.72729e-10	1	2	NULL
Q9RS71	DR_2256	46.8141	39.9388	27.3836	22.912	22.2236	21.33	33.9042	40.3074	42.7451	51.3109	23.0588	27.7089	30.206	30.1255	28.3131	29.8586	-0.786481	-0.994123	-0.22527	-0.88961	-0.64061	-0.693204	no change	no change	no change	no change	no change	no change	0.000342399	0	0	NULL
Q9RS72	DR_2255	0.134109	0.0234371	0.0264301	0.027576	0.0744744	NULL	0.00978095	NULL	0.153324	NULL	0.0763957	NULL	0.00775128	NULL	NULL	NULL	-1.54458	-1.06869	-3.91876	-0.99903	-4.1982	-6.91916	down	down	down	no change	down	down	0.775392	NULL	NULL	NULL
Q9RS74	DR_2253	0.429729	0.224482	0.549475	0.331454	0.591602	0.397958	0.63345	0.14262	0.171127	0.132743	0.212154	0.315269	0.263049	0.221427	0.350059	0.312003	0.42927	0.597031	0.24643	0.795507	0.672972	1.12351	no change	no change	no change	no change	no change	up	0.503336	NULL	NULL	NULL
Q9RS76	DR_2251	0.145006	0.0792157	0.0259808	0.0289599	0.0231167	0.197334	NULL	NULL	NULL	0.144485	0.0718253	NULL	0.278554	0.265241	NULL	0.0526342	-2.02898	-0.0244701	-7.46153	-1.00197	1.90581	-1.44585	down	no change	down	down	up	down	0.0078116	0	1	NULL
Q9RS77	DR_2250	0.29886	0.31428	0.0644325	0.20251	0.114191	0.0912426	0.319715	0.266891	0.311261	0.195872	0.39697	0.250749	0.186359	0.242235	0.227218	0.256756	-1.19969	-1.57754	-0.0638264	0.353006	-0.242752	-0.0674327	down	down	no change	no change	no change	no change	0.000276776	0	0	NULL
Q9RS78	DR_2249	0.0763879	0.0310249	0.125689	0.0373699	0.177711	0.0811596	0.0327301	0.0448223	0.0398925	0.0525979	0.16132	0.0457705	0.0861782	0.090625	0.0553031	0.0294568	0.602224	1.26906	-0.469924	1.16288	0.934769	-0.125921	no change	up	no change	up	no change	no change	0.416053	NULL	NULL	NULL
Q9RS80	DR_2247	0.0101711	NULL	0.0682593	NULL	0.478598	0.335375	1.33754	1	0.0202115	3.01518	0.757474	0.100524	0.702943	0.520141	1.10936	0.872979	2.67242	6.23492	7.75685	-1.82284	-1.31136	-0.614675	up	up	up	down	down	no change	0.0859673	NULL	NULL	NULL
Q9RS82	DR_2245	0.614084	1.44355	0.983709	0.467891	1.27549	1.0058	0.47477	0.0664199	1.27034	1.35307	1.45324	1.07149	2.81597	4.63275	0.57301	0.428455	-0.503345	0.148864	-1.92678	-0.0553166	1.50555	-1.38933	no change	no change	down	no change	up	down	0.000146627	0	1	NULL
Q9RS83	DR_2244	1.41178	1.15986	3.17439	2.07471	2.04101	1.09558	1.09485	1.71141	1.92422	2.20883	2.55137	2.36305	2.15954	1.18542	2.68201	1.30382	1.02939	0.286511	0.12596	0.249809	-0.305221	-0.052331	up	no change	no change	no change	no change	no change	0.217249	NULL	NULL	NULL
Q9RS84	phoU	0.86284	1.55883	2.3103	2.27678	0.236287	0.524712	0.484301	1.19285	1.18959	1.01396	1.26142	1.31528	0.952695	0.595548	1.21589	2.27109	0.921575	-1.67003	-0.529985	0.225689	-0.509198	0.662147	no change	down	no change	no change	no change	no change	0.000116548	0	0	NULL
Q9RS85	DR_2242	1.30044	NULL	3.92669	1.04858	8.84161	0.199647	2.64848	0.116903	3.67162	2.1072	3.17281	2.41385	0.926688	2.86593	1.20411	1.09962	1.93506	2.79681	1.08777	-0.0487907	-0.607583	-1.3268	up	up	up	no change	no change	down	0.159858	NULL	NULL	NULL
Q9RS86	DR_2241	0.586958	1.24427	0.629674	1.11277	0.200968	0.400712	0.024717	0.33985	1.03532	1.6114	0.530516	1.06695	0.790724	0.887548	0.668269	0.527877	-0.0717011	-1.60574	-2.32856	-0.72842	-0.657231	-1.14581	no change	down	down	no change	no change	down	0.105305	NULL	NULL	NULL
Q9RS87	DR_2240	0.790681	0.699449	33.3146	32.7898	46.3244	39.3846	43.8915	38.8529	1.85559	2.21983	38.8246	41.2349	12.6803	20.6066	44.1677	52.8955	5.47124	5.84594	5.79515	4.29605	3.02993	4.5739	up	up	up	up	up	up	1.11143e-08	3	3	sustain_up
Q9RS88	DR_2239	0.69985	1.35431	0.903892	0.376511	0.655065	0.724205	0.318424	0.325433	1.51822	0.812841	0.76896	0.982503	0.359303	0.799712	0.484888	0.474246	-0.681952	-0.574645	-1.67374	-0.412423	-1.00808	-1.28118	no change	no change	down	no change	down	down	0.54228	NULL	NULL	NULL
Q9RS89	DR_2238	1.92719	2.6448	2.52416	1.79109	4.00314	4.02915	6.37639	4.16864	1.91523	1.54176	2.67595	3.17634	2.40512	3.72015	3.97131	2.83245	-0.0833782	0.812988	1.20567	0.759485	0.825255	0.976813	no change	no change	up	no change	no change	no change	0.00546262	1	0	NULL
Q9RS90	DR_2237	0.995788	0.317338	0.0750875	0.801914	0.163098	0.121873	0.097183	NULL	0.386373	0.226547	0.0561372	0.327225	0.251848	0.0957561	0.086942	0.177614	-0.582355	-2.20412	-3.74675	-0.676989	-0.818253	-1.21213	no change	down	down	no change	no change	down	0.172944	NULL	NULL	NULL
Q9RS92	DR_2235	0.763114	0.834772	0.277504	0.839087	1.38243	0.807263	0.843818	0.786166	0.645696	0.740349	0.641734	0.757592	1.59785	2.24692	0.78273	1.3469	-0.517063	0.454567	0.028694	0.0137568	1.47193	0.619627	no change	no change	no change	no change	up	no change	0.0099769	0	1	NULL
Q9RS93	DR_2234	0.00592878	0.00404431	NULL	0.0271601	0.286496	0.265055	0.123281	0.151601	0.00961409	0.0149977	0.140333	0.083677	0.189656	0.0587916	0.183667	0.185534	1.47877	5.78931	4.78463	3.18614	3.33552	3.90699	up	up	up	up	up	up	2.81963e-06	3	3	sustain_up
Q9RS94	DR_2233	0.0442565	0.327635	NULL	0.0851895	0.379151	0.233513	0.331697	0.0746213	0.263751	0.0359054	0.113647	NULL	0.512688	0.197758	0.184378	0.0861678	-2.1154	0.720213	0.127729	-1.39069	1.24542	-0.147432	down	no change	no change	down	up	no change	0.774491	NULL	NULL	NULL
Q9RS95	DR_2232	0.355739	0.109121	0.926197	0.519794	1.51947	0.826504	2.0744	0.292563	0.444003	0.0846266	0.764678	0.120858	0.571599	0.0240377	0.771757	0.721789	1.63719	2.33532	2.34817	0.744293	0.172176	1.49841	up	up	up	no change	no change	up	0.266233	NULL	NULL	NULL
Q9RS96	DR_2231	1.76297	0.272861	1.76154	2.09223	0.352682	0.526144	0.277849	1.37884	0.378202	0.506389	0.304498	0.613574	0.185475	0.0901135	0.254606	1.4035	0.920655	-1.21197	-0.297311	0.0535984	-1.68249	0.906456	no change	down	no change	no change	down	no change	0.0302668	0	0	NULL
Q9RS98	DR_2229	0.132972	1.09237	0.0259862	0.379934	2.59239	1.32841	4.80612	4.54694	5.20426	13.2964	1.2007	4.56234	8.71203	12.4956	1.54007	2.09299	-1.59391	1.67797	2.93226	-1.68268	0.197004	-2.34832	down	up	up	down	no change	down	5.27563e-05	2	0	early_up
Q9RSA0	apgM	8.89936	12.8302	15.5795	9.31248	4.18026	1.14192	10.8347	9.58625	8.17547	7.44849	5.9595	5.08387	6.22577	8.77637	5.46962	6.68942	0.196024	-2.02957	-0.0896047	-0.50058	-0.0585908	-0.361731	no change	down	no change	no change	no change	no change	4.00225e-05	0	0	NULL
Q9RSA2	DR_2225	1.80184	2.0957	4.14487	5.2753	4.13142	4.53955	6.94747	7.29055	5.11231	5.16673	6.58222	5.82914	5.71058	4.46611	4.04608	3.65647	1.27319	1.15363	1.86911	0.271956	-0.014436	-0.416299	up	up	up	no change	no change	no change	2.69169e-10	3	0	early_up
Q9RSA3	DR_2224	0.60949	0.254931	0.369566	NULL	1.63702	0.944628	0.0491987	0.0368861	4.10502	3.41521	1.11414	1.00309	4.79446	2.3917	0.228842	0.490904	-1.22342	1.57849	-3.3279	-1.8286	-0.065553	-3.38522	down	up	down	down	no change	down	0.000168318	1	0	NULL
Q9RSA4	DR_2223	0.125232	0.191212	0.122633	0.0661215	0.0592416	0.05893	0.294827	0.103456	0.160178	0.248552	0.242782	0.126043	0.13086	0.113223	0.0713034	0.119274	-0.74544	-1.42107	0.331846	-0.148212	-0.743777	-1.10077	no change	down	no change	no change	no change	down	0.00975198	0	0	NULL
Q9RSA5	DR_2221	5.18611	8.44287	15.2476	16.8443	9.26713	10.4138	3.53418	5.09241	91.312	115.181	15.799	11.2217	43.9016	34.6056	21.2461	17.3698	1.23553	0.530122	-0.659816	-2.93395	-1.39519	-2.41882	up	no change	no change	down	down	down	2.32623e-11	1	0	NULL
Q9RSA6	DR_2220	4.53539	7.67349	1.4327	3.75701	17.8629	17.9496	2.70109	6.57287	4.46068	3.85723	3.30044	6.61927	23.3593	12.6726	16.2346	14.8378	-1.2342	1.55253	-0.396673	0.254077	2.11498	1.90134	down	up	no change	no change	up	up	0.000697509	1	2	NULL
Q9RSA7	DR_2219	0.187948	0.013974	0.0651596	0.93353	0.0303057	0.211258	0.0894777	0.38193	NULL	NULL	NULL	0.00880404	0.0522762	0.139834	0.0571942	0.149486	2.30624	0.258605	1.22318	2.89155	7.23853	7.344	up	no change	up	up	up	up	0.117552	NULL	NULL	NULL
Q9RSA8	DR_2218	NULL	NULL	NULL	NULL	0.14322	0.0903723	NULL	NULL	0.036169	NULL	NULL	NULL	0.102191	0.0299305	0.0584031	0.0455989	0	7.52059	0	-4.85458	1.84388	1.49863	no change	up	no change	down	up	up	0.000908378	1	2	NULL
Q9RSA9	DR_2216	4.47	5.17882	4.06899	2.42245	4.62346	4.03062	9.92391	5.61841	2.24994	2.65772	7.56313	2.58784	2.59263	2.51706	5.48491	2.85289	-0.571814	-0.156972	0.687777	1.04851	0.0582026	0.764634	no change	no change	no change	up	no change	no change	0.0138558	0	1	NULL
Q9RSB1	DR_2214	0.334686	0.278733	0.357309	0.295318	0.153541	0.0806492	0.441989	0.443071	0.0977288	0.18903	0.475087	0.462142	0.176231	0.125188	0.255553	0.26127	0.0893864	-1.38919	0.528902	1.70857	0.0719309	0.849834	no change	down	no change	up	no change	no change	2.07844e-08	0	1	NULL
Q9RSB2	DR_2213	1.12273	1.46748	1.13279	1.20427	1.44969	1.21304	0.821952	0.291799	2.26481	1.94315	1.27398	1.26288	1.40839	1.27314	1.15189	0.847699	-0.148372	0.0398389	-1.21764	-0.730077	-0.650067	-1.07341	no change	no change	down	no change	no change	down	0.000804687	0	0	NULL
Q9RSB3	DR_2212	0.0126923	0.241902	0.165356	0.103077	0.121582	0.0829698	0.0634718	0.0493112	0.0456645	0.144792	NULL	0.00733752	0.068248	0.0155387	0.0604957	0.0327432	0.0763657	-0.315732	-1.17465	-4.57809	-1.18467	-1.03045	no change	no change	down	down	down	down	0.181749	NULL	NULL	NULL
Q9RSB4	trmH	2.76959	2.51138	1.06992	0.257681	0.840598	1.05328	0.33767	0.0597333	2.90659	4.32189	0.0977468	0.480821	2.47566	2.43326	0.373801	0.215789	-1.99198	-1.47946	-3.73213	-3.64313	-0.558286	-3.61591	down	down	down	down	no change	down	0.00029979	0	0	NULL
Q9RSB6	DR_2209	NULL	0.682458	0.102181	NULL	NULL	0.126305	0.902579	NULL	0.246259	0.0376517	0.146644	0.0466812	NULL	0.901894	NULL	0.0112588	-2.732	-2.42792	0.402985	-0.554406	1.66854	-4.57703	down	down	no change	no change	up	down	0.0734181	NULL	NULL	NULL
Q9RSB8	DR_2207	1.75767	0.857473	0.422906	1.59492	0.164269	0.308269	1.45352	2.04623	1.01814	1.02225	0.640533	0.557285	0.660935	1.41336	0.610735	0.681419	-0.374085	-2.46839	0.420363	-0.768434	0.0237801	-0.659065	no change	down	no change	no change	no change	no change	0.000770031	0	0	NULL
Q9RSB9	DR_2206	5.84125	6.27894	4.94265	3.91351	2.78935	2.59808	6.81373	10.3657	5.57409	6.93426	3.91135	4.84351	2.4236	3.62508	3.86376	3.99778	-0.452659	-1.16975	0.50327	-0.514734	-1.0482	-0.670007	no change	down	no change	no change	down	no change	5.48853e-05	0	0	NULL
Q9RSC0	DR_2205	NULL	NULL	NULL	0.276886	NULL	0.318077	0.172768	NULL	NULL	NULL	0.157814	NULL	NULL	NULL	NULL	0.00711565	7.7692	7.96886	7.09074	6.96063	0	2.60726	up	up	up	up	no change	up	0.465309	NULL	NULL	NULL
Q9RSC1	DR_2204	1.46444	0.587392	NULL	NULL	0.346675	0.332173	0.604819	NULL	3.60721	0.893476	0.90423	0.914233	0.65059	0.926191	1.82388	1.98948	-10.6554	-1.59575	-1.76082	-1.30742	-1.51316	-0.23908	down	down	down	down	down	no change	0.297655	NULL	NULL	NULL
Q9RSC2	DR_2203	0.0294837	0.123721	0.653728	0.543563	0.392511	0.225817	0.194178	0.216702	0.235224	0.193001	0.151031	0.143282	0.457338	0.157537	0.316899	0.133393	2.96625	2.01292	1.42326	-0.541022	0.521923	0.0724905	up	up	up	no change	no change	no change	1.92296e-05	3	0	early_up
Q9RSC3	DR_2202	5.98651	6.05682	2.97775	3.36297	2.0455	2.22589	2.62626	3.27742	6.41073	7.09331	3.0742	2.28479	3.80488	4.61917	4.49421	4.70654	-0.925515	-1.49546	-1.02855	-1.33336	-0.680807	-0.553569	no change	down	down	down	no change	no change	2.30788e-06	0	0	NULL
Q9RSC5	pyrF	3.89032	4.76647	1.02815	0.806257	3.36374	2.7032	0.43388	0.666062	7.97246	8.36339	3.02669	3.81235	5.63283	8.63571	4.71221	6.63978	-2.23851	-0.512861	-2.9764	-1.25618	-0.195204	-0.525097	down	no change	down	down	no change	no change	0.031719	0	0	NULL
Q9RSC6	DR_2199	0.706801	0.480765	0.638859	0.393633	0.435653	0.308611	0.599093	0.778224	0.781921	0.905117	0.413975	0.692447	0.211994	0.205343	0.444202	0.576053	-0.201878	-0.674123	0.213854	-0.608591	-2.01521	-0.725564	no change	no change	no change	no change	down	no change	0.00280396	0	0	NULL
Q9RSC7	DR_2198	2.27002	3.13356	1.64356	1.05182	1.29649	2.06308	3.89109	1.36825	1.24964	1.80609	0.544563	0.530541	NULL	2.42283	0.670648	2.48937	-1.00342	-0.685637	-0.0390323	-1.50704	-0.334442	0.048416	down	no change	no change	down	no change	no change	0.84995	NULL	NULL	NULL
Q9RSC8	DR_2197	1.23265	0.512914	0.022869	NULL	0.185517	0.889293	0.522155	0.739154	0.716748	0.462286	0.800896	0.711751	0.706256	0.696811	0.868667	0.985368	-6.21457	-0.699608	-0.468767	0.359471	0.250979	0.653063	down	no change	no change	no change	no change	no change	0.00237772	0	0	NULL
Q9RSC9	DR_2196	0.117056	0.0271705	0.0787284	0.0229378	0.101294	0.128292	0.207974	0.213309	0.122979	NULL	0.0712811	0.174322	0.0915037	0.0886949	0.201588	0.220152	-0.504496	0.670698	1.54646	0.990477	0.543735	1.7705	no change	no change	up	no change	no change	up	0.111349	NULL	NULL	NULL
Q9RSD0	DR_2195	15.902	19.5188	12.7979	15.8962	15.4243	15.6459	9.58956	12.5129	20.0055	14.6141	13.8804	15.0746	11.9334	9.3738	14.8775	13.142	-0.303839	-0.189067	-0.680391	-0.257778	-0.700249	-0.305157	no change	no change	no change	no change	no change	no change	0.00304904	0	0	NULL
Q9RSD1	DR_2194	NULL	NULL	NULL	NULL	0.0740309	0.0683043	NULL	NULL	NULL	NULL	0.0811542	0.0567808	NULL	0.0221591	0.0966596	0.112601	0	6.80589	0	6.76059	4.1634	7.3619	no change	up	no change	up	up	up	1.02118e-12	1	3	NULL
Q9RSD2	DR_2193	0.297352	0.101713	0.449032	NULL	0.823336	0.294588	0.367638	NULL	NULL	NULL	0.247513	NULL	0.344023	0.0341552	0.324715	0.241101	0.172238	1.48613	-0.115845	7.60781	8.21567	8.79693	no change	up	no change	up	up	up	0.122212	NULL	NULL	NULL
Q9RSD3	DR_2192	0.543964	0.14318	0.0333638	0.415061	0.393943	0.831571	0.0370489	0.230457	0.350128	0.0767918	0.439949	0.370571	0.018086	0.210997	0.573059	0.54829	-0.615746	0.834704	-1.36104	0.924883	-0.898093	1.3932	no change	no change	down	no change	no change	up	0.000253651	0	1	NULL
Q9RSD4	DR_2190	9.88484	7.20995	7.4918	7.08782	12.1167	11.612	15.4095	9.05535	17.8448	21.9027	10.5287	10.2712	12.978	14.4429	11.3891	12.5345	-0.229604	0.473071	0.517152	-0.93429	-0.535586	-0.732428	no change	no change	no change	no change	no change	no change	2.06525e-05	0	0	NULL
Q9RSD6	DR_2188	46.3234	60.0741	39.0285	35.2352	8.84498	9.11287	17.9943	27.1719	48.892	56.936	22.296	12.8249	24.5245	31.7008	14.3874	11.2209	-0.518735	-2.56678	-1.23615	-1.59132	-0.912432	-2.04704	no change	down	down	down	no change	down	2.18859e-06	0	0	NULL
Q9RSD7	DR_2187	0.199694	0.147217	0.235792	0.11509	NULL	NULL	0.0286161	0.0843473	0.0638913	0.103917	0.0905191	0.0094751	0.0341589	0.32693	0.0797563	0.0653101	0.0164218	-8.09116	-1.61871	-0.746902	1.10554	-0.210104	no change	down	down	no change	up	no change	0.00192089	0	1	NULL
Q9RSD8	DR_2186	2.41758	4.94964	3.40318	2.46242	3.23182	2.38448	0.345813	0.911907	2.41536	2.48609	1.45095	2.20101	1.57462	1.01702	1.51273	1.2981	-0.32884	-0.391499	-2.55031	-0.424534	-0.919341	-0.802209	no change	no change	down	no change	no change	no change	0.00776512	0	0	NULL
Q9RSE0	DR_2184	0.503207	0.23083	0.372611	0.437195	0.511466	0.743482	0.0610853	0.0806265	1.98442	1.01268	0.267375	1.16513	0.496552	0.171843	0.784818	0.548943	0.141724	0.773703	-2.37289	-1.06503	-2.16479	-1.16807	no change	no change	down	down	down	down	0.00150155	0	0	NULL
Q9RSE1	DR_2183	NULL	NULL	NULL	NULL	NULL	NULL	NULL	0.0673759	NULL	NULL	NULL	NULL	NULL	0.00304684	0.0381837	0.0418493	0	0	5.74046	0	1.53359	5.97527	no change	no change	up	no change	up	up	0.967671	NULL	NULL	NULL
Q9RSE2	DR_2182	0.334156	0.491042	1.75273	3.00582	4.35344	3.08328	2.36617	1.58194	3.2229	0.83034	3.77416	2.68344	3.38367	5.19501	2.78178	4.15913	2.52771	3.17185	2.25835	0.671922	1.08168	0.776048	up	up	up	no change	up	no change	0.530821	NULL	NULL	NULL
Q9RSE3	DR_2181	0.248355	0.173771	0.408977	0.265351	3.43419	2.22134	1.40129	0.792245	0.504648	0.307453	1.21431	1.11543	0.13003	1.85822	0.562571	1.69334	0.675775	3.74392	2.37751	1.52044	1.29177	1.47398	no change	up	up	up	up	up	0.000542023	2	3	sustain_up
Q9RSE4	DR_2180	NULL	NULL	NULL	NULL	1.7103	1.25248	0.239541	0.299245	NULL	NULL	0.236091	0.472554	1.04778	0.955443	1.20661	0.909331	0	11.1855	8.72631	9.12166	10.6208	10.6998	no change	up	up	up	up	up	1.6847e-07	2	3	sustain_up
Q9RSE5	DR_2179	0.0955674	NULL	0.10006	0.0346345	0.675443	0.387787	1.97979	0.910192	0.162876	0.0117473	0.478049	0.0692385	1.74885	0.463555	3.18695	2.46383	0.485532	3.46622	4.90883	1.64805	3.6633	5.01613	no change	up	up	up	up	up	0.0149083	2	3	sustain_up
Q9RSE6	purB	18.743	26.8497	21.0939	15.6238	13.288	11.8635	30.3705	33.9041	24.2526	23.6032	12.3548	16.5442	17.823	19.9752	17.6906	13.696	-0.312324	-0.858162	0.495446	-0.727671	-0.340375	-0.608542	no change	no change	no change	no change	no change	no change	7.1646e-07	0	0	NULL
Q9RSE7	DR_2177	NULL	NULL	NULL	NULL	NULL	NULL	0.247692	0.308618	NULL	NULL	0.0360395	NULL	0.0615771	NULL	0.277304	0.0894797	0	0	8.77249	4.84949	5.61189	8.17153	no change	no change	up	up	up	up	0.039411	1	3	NULL
Q9RSE8	DR_2176	0.24207	0.103793	0.175344	0.116989	0.0917506	0.432401	0.202755	0.270557	0.530978	0.301475	0.0652139	0.577196	0.244186	0.472147	0.923288	0.086452	-0.242582	0.599785	0.452596	-0.373874	-0.21674	0.278543	no change	no change	no change	no change	no change	no change	0.869751	NULL	NULL	NULL
Q9RSF0	leuS	10.3166	12.5223	12.207	12.9341	4.60493	10.1832	9.88279	8.54993	9.38546	13.0315	10.7032	12.2715	8.92252	7.69421	9.32853	7.71075	0.138556	-0.627049	-0.309223	0.0354551	-0.431951	-0.395724	no change	no change	no change	no change	no change	no change	0.612923	NULL	NULL	NULL
Q9RSF1	DR_2173	NULL	NULL	0.032061	0.0229304	0.0137351	0.0246567	0.040671	0.0377376	NULL	0.037101	0.57746	0.0375431	0.193036	0.0780691	0.304057	0.366006	5.43388	4.91547	5.94568	4.02654	2.8448	4.15024	up	up	up	up	up	up	0.0755474	NULL	NULL	NULL
Q9RSF2	DR_2172	NULL	NULL	NULL	NULL	NULL	NULL	0.289674	0.165881	NULL	NULL	NULL	NULL	0.125651	NULL	0.621975	NULL	0	0	8.48422	0	6.63331	8.93493	no change	no change	up	no change	up	up	0.885497	NULL	NULL	NULL
Q9RSF5	DR_2169	2.13024	0.145259	1.36059	1.15569	2.99857	2.20104	7.30756	0.262474	2.08085	1.88794	2.31108	2.36715	2.31159	3.90449	2.13883	2.71506	0.145111	1.19222	1.73412	0.237264	0.647307	0.290443	no change	up	up	no change	no change	no change	0.403668	NULL	NULL	NULL
Q9RSF6	DR_2168	1.32418	0.696935	0.238088	0.0605786	0.601033	0.270933	1.13212	0.895828	3.11698	1.80723	2.25449	1.18051	1.37616	0.634111	1.30663	0.832446	-2.75855	-1.21281	0.00487007	-0.519582	-1.2925	-1.20291	down	down	no change	no change	down	down	0.00635948	0	0	NULL
Q9RSF8	DR_2166	5.67596	7.76048	35.7134	0.586713	12.6907	11.8616	0.446716	0.678269	7.24888	5.13888	11.3191	11.7187	3.24056	1.67471	11.0834	9.8847	1.43382	0.869706	-3.57817	0.895087	-1.33357	0.759284	up	no change	down	no change	down	no change	0.066811	NULL	NULL	NULL
Q9RSG0	ispH	NULL	0.0503099	0.230844	0.251976	0.964493	1.84251	0.0363898	0.227952	0.259736	NULL	0.517629	0.421149	1.28076	1.26902	0.694608	0.624424	3.24445	5.78392	2.37537	1.85021	3.29173	2.34084	up	up	up	up	up	up	0.0262495	3	3	sustain_up
Q9RSG3	DR_2161	NULL	NULL	NULL	NULL	0.0606394	0.201447	NULL	NULL	NULL	NULL	0.0551327	0.0251331	NULL	NULL	NULL	0.144799	0	7.68664	0	5.97946	0	6.83697	no change	up	no change	up	no change	up	0.000955954	1	2	NULL
Q9RSG4	DR_2160	0.466557	4.2058	0.477422	2.35193	0.28658	1.11115	0.39472	1.16672	1.13492	1.70196	0.465562	1.75793	0.512756	0.953365	0.781905	1.60045	-0.723679	-1.74107	-1.58127	-0.351478	-0.952301	-0.251916	no change	down	down	no change	no change	no change	0.562795	NULL	NULL	NULL
Q9RSG6	DR_2158	NULL	NULL	NULL	NULL	NULL	0.123261	NULL	NULL	NULL	NULL	NULL	0.0332312	NULL	NULL	NULL	0.179165	0	6.60575	0	4.73456	0	7.143	no change	up	no change	up	no change	up	0.030313	1	2	NULL
Q9RSG7	DR_2157	0.100798	0.992116	0.191433	0.371991	0.0969574	NULL	0.213639	NULL	0.420311	1.17766	NULL	0.0165938	0.286667	NULL	0.0681572	0.301254	-0.955885	-3.48525	-2.35064	-6.53518	-2.47559	-2.11294	no change	down	down	down	down	down	0.256934	NULL	NULL	NULL
Q9RSG9	DR_2155	0.924101	0.029915	0.951782	0.684144	0.775002	1.02508	1.40909	1.06177	1.07562	1.56633	1.1069	1.40506	0.765776	1.06454	1.58393	1.14309	0.778023	0.915976	1.37293	-0.0727981	-0.529516	0.045721	no change	no change	up	no change	no change	no change	0.0273976	1	0	NULL
Q9RSH0	DR_2154	22.4675	22.4271	12.418	11.9279	16.1608	17.0864	34.378	36.3969	21.6075	21.5941	24.7345	18.9392	16.7349	8.98298	20.2379	15.3973	-0.882867	-0.433313	0.656694	0.0156789	-0.748314	-0.277779	no change	no change	no change	no change	no change	no change	2.58046e-08	0	0	NULL
Q9RSH1	DR_2153	0.76706	0.623326	0.724962	0.110121	2.66989	1.59125	2.55067	4.06437	0.323808	0.0472207	1.0471	0.616271	1.30226	1.61221	1.80179	1.35983	-0.735494	1.61575	2.25026	2.16451	2.97363	3.09106	no change	up	up	up	up	up	0.00140972	2	3	sustain_up
Q9RSH2	rpmH	62.6631	54.0617	27.0277	5.94877	NULL	NULL	42.3197	36.9719	52.1632	58.8408	35.6273	56.3806	10.3701	5.21619	7.95038	0.370284	-1.8236	-16.4855	-0.557872	-0.270783	-2.83227	-3.73777	down	down	no change	no change	down	down	5.63861e-07	0	0	NULL
Q9RSH4	DR_2150	NULL	NULL	NULL	NULL	0.0990906	0.0433576	0.20691	0.222173	NULL	0.0578295	0.0612118	0.0659905	0.111266	0.20651	0.146974	0.126681	0	6.80704	8.39786	1.12147	2.44235	2.2267	no change	up	up	up	up	up	4.78658e-05	2	3	sustain_up
Q9RSH5	yidC	0.984479	4.28444	3.44637	3.72617	1.27207	2.38691	1.71923	2.21898	1.27104	2.30704	1.40029	1.46211	0.993149	0.377546	1.14786	0.627103	0.444976	-0.526068	-0.419968	-0.321961	-1.38428	-1.01139	no change	no change	no change	no change	down	down	0.363454	NULL	NULL	NULL
Q9RSH6	DR_2148	8.5689	7.61707	12.1911	11.9087	7.65094	6.53705	7.82983	9.72989	11.1261	11.6645	11.3083	8.32726	7.10448	6.22722	11.702	4.32146	0.574279	-0.190074	0.117525	-0.214968	-0.773574	-0.508251	no change	no change	no change	no change	no change	no change	0.0314138	0	0	NULL
Q9RSH7	DR_2147	0.60519	0.729015	0.107315	NULL	0.545682	0.304994	0.506014	0.186588	0.878197	1.326	0.483692	0.57564	1.54927	1.32153	0.643993	0.508606	-3.62753	-0.649299	-0.945882	-1.0571	0.381197	-0.935363	down	no change	no change	down	no change	no change	0.000299202	0	0	NULL
Q9RSH8	DR_2146	0.258163	0.946306	0.582714	1.03298	0.760238	0.0529118	0.149963	0.0581646	1.74353	1.99664	0.339881	0.777325	1.22951	1.92699	1.31615	0.999935	0.423755	-0.566804	-2.53285	-1.74321	-0.244778	-0.69142	no change	no change	down	down	no change	no change	0.000227121	0	0	NULL
Q9RSH9	DR_2145	0.0943657	0.0534854	0.0564017	NULL	0.10629	0.134046	0.277895	0.268273	0.0854078	0.0662243	0.215696	0.158609	0.341815	0.257169	0.0806885	0.152631	-1.37416	0.700907	1.8852	1.30364	1.98194	0.621731	down	no change	up	up	up	no change	1.29371e-08	1	2	NULL
Q9RSI0	DR_2144	1.90234	0.122674	0.104937	0.120567	0.275336	0.0804619	0.0717421	NULL	0.230044	0.206242	0.88386	0.256026	0.158215	0.0647618	0.270531	NULL	-3.16671	-2.5088	-4.80623	1.38554	-0.968382	-0.68609	down	down	down	up	no change	no change	0.0366152	0	1	NULL
Q9RSI1	DR_2143	1.62678	2.28424	1.40466	1.23607	2.05597	2.23052	3.02636	3.80499	0.656148	0.865479	1.2342	1.81082	1.04954	1.12424	2.34215	1.92318	-0.566609	0.132253	0.804628	1.00084	0.514589	1.48704	no change	no change	no change	up	no change	up	9.47112e-05	0	2	late_up
Q9RSI2	DR_2142	0.788855	1.51451	2.12628	2.56003	1.31684	1.76941	5.91138	3.28369	1.06447	1.48905	1.07532	0.52899	0.0824506	1.09719	1.98327	1.95313	1.02471	0.422108	1.99712	-0.670537	-1.11415	0.624389	up	no change	up	no change	down	no change	0.0036321	2	0	early_up
Q9RSI3	DR_2141	0.204141	0.197934	0.161967	0.063004	0.650518	0.758868	0.560317	0.542085	0.174469	0.21642	0.171409	0.13738	0.494636	0.996563	0.41643	0.28349	-0.837725	1.80953	1.45511	-0.340134	1.93165	0.840433	no change	up	up	no change	up	no change	0.130207	NULL	NULL	NULL
Q9RSI4	hisD	2.65278	0.6425	0.720042	1.19669	5.02624	4.87699	3.18051	4.30585	0.162288	0.544585	1.71501	3.09962	1.7271	1.46767	2.71478	2.70823	-0.781757	1.5875	1.18386	2.7679	2.17619	2.93957	no change	up	up	up	up	up	3.48612e-06	2	3	sustain_up
Q9RSI9	deoB	12.3783	13.8238	11.3334	16.2422	6.85856	8.61497	7.80101	8.67101	11.8371	16.1604	10.0876	12.1103	6.80046	10.3844	5.60775	6.63945	0.0737062	-0.759881	-0.669666	-0.334871	-0.704158	-1.19285	no change	no change	no change	no change	no change	down	0.0868197	NULL	NULL	NULL
Q9RSJ0	DR_2134	5.00898	2.50017	1.49344	1.64512	3.12319	2.12	2.52877	3.06981	1.41098	1.89008	5.98631	4.96608	4.19499	2.45388	3.93222	4.24078	-1.25855	-0.518205	-0.423591	1.73024	1.01018	1.30793	down	no change	no change	up	up	up	3.36827e-06	0	3	late_up
Q9RSJ1	DR_2133	0.201443	0.062177	NULL	0.215723	0.149134	0.280282	0.0934015	0.098245	0.0142822	0.0215227	0.133069	0.108381	0.146275	0.0571571	0.0828199	0.29901	-0.285032	0.703916	-0.460013	2.75349	2.50632	3.4147	no change	no change	no change	up	up	up	0.0357753	0	3	late_up
Q9RSJ2	DR_2132	NULL	NULL	0.26188	0.138322	3.02018	3.03488	0.882249	0.057743	NULL	NULL	0.362709	0.571509	0.856509	11.5469	3.92178	3.79005	8.29733	12.2167	9.52925	9.52036	13.2512	12.5656	up	up	up	up	up	up	0.283384	NULL	NULL	NULL
Q9RSJ4	DR_2130	0.226419	0.0804391	0.128772	0.00981008	0.313639	0.298825	0.43757	0.470249	0.222949	0.0863836	0.213067	0.141118	0.13436	0.185118	2.83203	0.161531	-1.14683	0.997053	1.56483	0.195347	0.0465586	3.27464	down	no change	up	no change	no change	up	0.165409	NULL	NULL	NULL
Q9RSJ5	rplQ	25.1931	45.2083	1.60699	1.79455	8.18621	11.2815	0.269421	0.380009	39.9291	46.9507	1.15152	6.0486	6.23704	0.334063	1.51062	2.48594	-4.37134	-1.85452	-6.76029	-3.59293	-3.72481	-4.44219	down	down	down	down	down	down	0.0455268	0	0	NULL
Q9RSJ6	rpoA	26.9979	15.2471	17.1988	9.53184	28.15	21.3887	25.9633	29.3774	38.075	41.0327	45.8438	42.5408	33.1132	18.2009	46.6317	41.0654	-0.660287	0.229777	0.389561	0.159978	-0.624462	0.148711	no change	no change	no change	no change	no change	no change	0.000108097	0	0	NULL
Q9RSJ7	rpsD	127.494	168.205	132.965	113.964	109.734	103.848	42.2543	55.086	174.147	190.308	126.49	113.486	78.2025	100.623	75.0394	77.1206	-0.260032	-0.469337	-1.60302	-0.602856	-1.02719	-1.26015	no change	no change	down	no change	down	down	0.000867084	0	0	NULL
Q9RSJ8	rpsK	26.7211	18.918	14.1362	11.021	19.1473	14.4679	7.5858	7.68812	34.9867	20.5599	21.173	22.2516	6.12841	16.8191	21.4721	16.5679	-0.859296	-0.441153	-1.5792	-0.355187	-1.27536	-0.546181	no change	no change	down	no change	down	no change	0.00618451	0	0	NULL
Q9RSJ9	rpsM	163.22	170.162	160.349	116.386	44.7554	103.775	45.0367	57.6646	209.738	304.11	114.508	140.573	66.2557	79.8673	70.4683	42.1204	-0.268674	-1.16642	-1.69872	-1.01039	-1.81416	-2.19028	no change	down	down	down	down	down	0.00446498	0	0	NULL
Q9RSK0	rpmJ	61.3142	96.7036	1.69058	NULL	NULL	NULL	15.1831	16.1675	125.958	119.616	12.2288	8.03493	20.6256	30.9043	7.30974	3.25388	-6.54589	-16.9225	-2.33352	-3.59919	-2.25268	-4.53898	down	down	down	down	down	down	2.32218e-05	0	0	NULL
Q9RSK1	infA	51.89	27.9406	27.4147	27.4707	59.8338	59.9288	17.0558	7.05427	45.2389	49.7504	55.8851	41.2986	25.5657	37.311	26.7424	18.429	-0.540517	0.585164	-1.7273	0.0329486	-0.595241	-1.07236	no change	no change	down	no change	no change	down	1.14524e-05	0	0	NULL
Q9RSK2	DR_2122	14.5566	13.6587	2.85704	1.59352	3.62057	3.81325	4.62934	7.15966	18.5604	10.0996	12.7778	9.56335	8.25363	4.25831	5.75171	4.76304	-2.66442	-1.9243	-1.25903	-0.359332	-1.19573	-1.44662	down	down	down	no change	down	down	0.00142725	0	0	NULL
Q9RSK4	DR_2120	0.443637	0.416074	0.110365	NULL	NULL	0.226364	0.30842	0.650081	0.210472	0.552619	0.187974	0.474638	0.28545	0.247506	0.346685	0.233259	-2.95328	-1.92116	0.156928	-0.203692	-0.517837	-0.395941	down	down	no change	no change	no change	no change	0.0105629	0	0	NULL
Q9RSK5	DR_2119	0.201543	NULL	0.0417647	0.0381428	0.312039	0.0612543	0.0721648	NULL	NULL	NULL	NULL	NULL	0.449225	NULL	NULL	0.00350394	-1.33923	0.884672	-1.47361	0	8.46608	1.70238	down	no change	down	no change	up	up	0.687276	NULL	NULL	NULL
Q9RSK6	DR_2118	0.27141	0.41863	0.179559	0.300972	0.331939	0.0794007	0.456362	0.483872	NULL	0.00942042	0.16994	0.122543	0.337307	0.159647	0.145253	0.0853807	-0.522051	-0.746349	0.446339	4.86216	5.62691	4.5194	no change	no change	no change	up	up	up	0.000143815	0	3	late_up
Q9RSK7	adk	1.58784	1.27921	0.0315028	NULL	1.67412	0.210795	0.279136	0.306378	4.7681	3.47227	1.48041	1.60067	2.80492	1.14626	2.97648	3.23523	-6.4791	-0.605065	-2.29179	-1.41927	-1.06043	-0.40772	down	no change	down	down	down	no change	0.00903467	0	0	NULL
Q9RSK8	secY	4.0271	4.09645	2.02438	3.04056	4.5836	1.53955	2.52342	5.27232	3.03221	2.19105	6.04674	6.26015	4.02371	4.03453	5.14578	5.08182	-0.681563	-0.407835	-0.0594227	1.23644	0.625513	0.969444	no change	no change	no change	up	no change	no change	0.000350325	0	1	NULL
Q9RSK9	rplO	97.0047	98.3552	39.4861	52.7832	46.243	54.4356	12.5541	8.44208	136.541	122.358	57.5459	58.9551	21.1739	24.9676	11.6267	16.2021	-1.08221	-0.956376	-3.21794	-1.15205	-2.48825	-3.21774	down	no change	down	down	down	down	8.30352e-09	0	0	NULL
Q9RSL0	rpmD	45.6095	43.9999	8.34901	10.2598	1.14253	13.4314	1.13174	1.24874	103.708	52.9365	4.74407	1.21072	1.76918	0.637908	0.456024	3.11294	-2.26766	-2.62026	-5.23433	-4.7173	-6.02407	-5.45585	down	down	down	down	down	down	0.0050503	0	0	NULL
Q9RSL1	rpsE	13.7313	8.42588	13.6781	19.1925	10.3537	10.3147	4.44333	5.06348	3.68167	5.66282	10.8384	11.7751	5.06851	2.43778	7.47967	9.24323	0.569021	-0.100354	-1.22074	1.275	-0.316017	0.839636	no change	no change	down	up	no change	no change	5.60055e-05	0	1	NULL
Q9RSL2	rplR	114.882	101.985	18.4933	15.6334	2.45592	32.7752	2.25602	1.82009	106.145	135.186	30.9693	17.2906	19.1596	21.668	6.49916	6.1185	-2.66784	-2.62189	-5.73347	-2.32211	-2.5634	-4.2575	down	down	down	down	down	down	0.762444	NULL	NULL	NULL
Q9RSL3	rplF	195.411	203.46	22.313	42.1531	97.6507	78.6113	7.19304	5.32918	195.809	176.438	78.0206	56.0049	58.6541	52.11	46.8526	26.6636	-2.62931	-1.1782	-4.99336	-1.47375	-1.74877	-2.34013	down	down	down	down	down	down	3.02004e-06	0	0	NULL
Q9RSL4	rpsH	47.1251	34.4559	36.8134	16.4917	48.873	43.677	15.0033	16.6165	88.4126	87.8977	28.7842	28.4302	49.5853	40.3253	30.6508	23.7159	-0.613961	0.182	-1.36741	-1.62367	-0.971554	-1.69732	no change	no change	down	down	no change	down	4.88304e-07	0	0	NULL
Q9RSL5	rpsN	12.7718	22.8308	9.23956	9.10563	52.7662	57.7036	3.91607	NULL	23.8209	29.7447	21.3683	29.5186	12.1313	14.4114	30.277	23.2423	-0.956581	1.6336	-3.18427	-0.0740113	-1.01299	-0.00124697	no change	up	down	no change	down	no change	7.95507e-12	1	0	NULL
Q9RSL6	DR_2108	1.06966	0.752124	1.06604	0.848951	1.27998	0.989058	1.24492	1.15197	3.87991	2.39232	1.05115	0.383858	2.64491	2.40577	1.98422	1.07391	0.0719895	0.316735	0.395813	-2.12792	-0.312498	-1.03632	no change	no change	no change	down	no change	down	5.85294e-05	0	0	NULL
Q9RSL7	DR_2107	8.16423	13.1265	19.3254	16.2422	13.75	15.6565	19.1584	21.3167	9.83016	10.9317	17.313	17.1577	16.2645	18.6101	17.4365	15.2144	0.740338	0.465911	0.92681	0.731434	0.748245	0.653187	no change	no change	no change	no change	no change	no change	0.00424804	0	0	NULL
Q9RSL8	DR_2106	7.75719	5.55482	10.1028	9.69672	16.2197	17.8373	9.22793	10.3637	4.80167	2.76877	9.14836	9.5511	6.07928	4.64474	9.20423	12.0587	0.572736	1.35522	0.557512	1.30455	0.502397	1.48989	no change	up	no change	up	no change	up	3.68722e-09	1	2	NULL
Q9RSM1	DR_2103	NULL	NULL	NULL	NULL	NULL	0.0452926	NULL	NULL	NULL	NULL	0.0626086	0.0540536	NULL	NULL	NULL	0.0289457	0	5.17407	0	6.51894	0	4.53938	no change	up	no change	up	no change	up	1.52528e-05	1	2	NULL
Q9RSM3	DR_2101	6.03894	7.50765	8.4649	7.24932	9.09338	8.07079	19.6672	17.3788	4.00583	3.17416	13.1052	6.71365	7.96764	8.67727	5.56332	9.60904	0.214142	0.341472	1.45139	1.46482	1.21303	1.07939	no change	no change	up	up	up	up	5.54739e-06	1	3	NULL
Q9RSM4	DR_2100	2.40173	NULL	NULL	0.0514568	0.50821	0.295932	NULL	0.493897	NULL	0.263686	NULL	NULL	0.362729	0.296867	1.24099	0.292109	-5.52723	-1.57894	-2.28032	-7.6989	1.31929	2.53608	down	down	down	down	up	up	0.0620851	NULL	NULL	NULL
Q9RSM5	DR_2099	0.0195358	0.246401	NULL	0.0392536	0.141078	0.0710105	0.122701	0.114177	0.817195	1.08253	NULL	0.0566508	0.206089	0.477582	0.0253611	0.014686	-2.737	-0.326415	-0.16694	-5.05144	-1.47441	-5.56795	down	no change	no change	down	down	down	1.37262e-07	0	0	NULL
Q9RSM8	DR_2096	8.05349	5.78495	9.48174	3.63614	9.73447	6.24183	0.316913	0.643071	6.11929	3.2283	3.35162	4.39455	5.0746	2.24784	7.00022	5.11546	-0.0771461	0.207252	-3.84953	-0.271111	-0.35227	0.374209	no change	no change	down	no change	no change	no change	0.00015153	0	0	NULL
Q9RSM9	DR_2095	34.3887	24.772	23.4272	19.6121	68.6698	63.7218	59.206	51.0956	28.6237	21.7798	17.5063	24.3751	38.2989	16.4047	20.1614	29.5055	-0.458986	1.1621	0.898744	-0.267216	0.118111	-0.021238	no change	up	no change	no change	no change	no change	1.15051e-05	1	0	NULL
Q9RSN0	DR_2094	NULL	NULL	0.0471195	NULL	0.0353664	0.0106753	0.0089716	0.469425	0.0460716	NULL	NULL	0.165485	NULL	0.0734974	0.014711	0.0947578	5.23034	5.17761	8.55481	1.8305	0.666468	1.22879	up	up	up	up	no change	up	0.119367	NULL	NULL	NULL
Q9RSN3	DR_2091	0.0770536	0.658465	0.0636562	0.129341	0.134538	0.0471359	0.167707	0.408662	0.0955982	0.0641103	0.146804	0.0899464	0.139142	0.0110522	0.0559901	0.0261067	-1.93018	-2.01741	-0.35177	0.567928	-0.0886139	-0.960042	down	down	no change	no change	no change	no change	0.0745383	NULL	NULL	NULL
Q9RSN4	DR_2090	1.04338	1.83423	2.77569	1.60184	2.40963	2.10957	3.82368	3.46968	3.95151	3.03203	4.56157	1.67342	2.40016	0.496523	3.11898	2.73446	0.605247	0.651196	1.34171	-0.163572	-1.26956	-0.254675	no change	no change	up	no change	down	no change	0.00596387	1	0	NULL
Q9RSN5	DR_2089	2.38365	2.20424	1.92899	2.70298	1.11994	1.15293	0.423197	0.36991	1.94397	1.95693	1.62721	1.68757	0.0515032	0.803868	1.20872	1.13522	0.0137943	-1.01331	-2.53224	-0.234896	-2.18919	-0.734871	no change	down	down	no change	down	no change	1.60096e-05	0	0	NULL
Q9RSN6	DR_2088	0.303679	0.887107	0.291215	0.773427	0.831813	1.15499	0.350313	1.46198	0.127561	0.17051	0.834794	1.36731	0.205916	0.449089	0.571019	0.970115	-0.161546	0.738536	0.605906	2.88515	1.13585	2.37026	no change	no change	no change	up	up	up	0.00723522	0	3	late_up
Q9RSN7	infC	18.5674	24.0372	23.5147	13.8241	19.4013	24.6556	10.0819	12.9183	19.799	17.8981	21.3415	22.6567	14.259	15.1263	12.1698	10.6754	-0.190339	0.0483553	-0.889369	0.22299	-0.35936	-0.72256	no change	no change	no change	no change	no change	no change	0.00728407	0	0	NULL
Q9RSP0	DR_2084	0.152481	0.026762	0.0376722	0.0261884	0.432004	0.572667	0.2671	0.425614	0.133496	0.163718	0.337367	0.254389	0.800279	0.403732	0.636273	0.407127	-1.48892	2.48673	1.95034	0.993503	2.01828	1.81172	down	up	up	no change	up	up	0.27786	NULL	NULL	NULL
Q9RSP1	DR_2083	0.0649781	NULL	0.209299	NULL	NULL	NULL	0.52915	0.0964557	NULL	0.0847838	NULL	0.146064	0.13701	NULL	0.0708494	0.164614	1.67787	-5.68868	3.25317	0.780227	0.688318	1.46286	up	down	up	no change	no change	up	0.139235	NULL	NULL	NULL
Q9RSP3	thrS	6.1267	4.72446	9.04658	7.90063	5.16855	5.36535	5.73614	6.42973	8.63977	10.1946	8.23468	7.58021	4.6295	5.29771	5.20404	4.93941	0.643197	-0.0428098	0.164989	-0.252086	-0.923909	-0.89282	no change	no change	no change	no change	no change	no change	2.27333e-07	0	0	NULL
Q9RSP7	DR_2077	0.484264	0.183763	2.67778	0.186492	1.47352	0.579166	0.656893	0.664886	0.672177	0.323494	0.677272	1.27287	1.8804	0.608816	0.989683	0.935199	2.10019	1.61953	0.984503	0.969835	1.32195	0.951029	up	up	no change	no change	up	no change	0.606696	NULL	NULL	NULL
Q9RSP8	DR_2076	6.06898	5.51981	5.5948	9.00626	4.25604	5.28531	5.36105	6.42777	5.37511	12.253	5.52807	4.90492	2.10162	5.14786	2.37516	6.22661	0.333342	-0.280465	0.0246894	-0.756722	-1.28193	-1.03517	no change	no change	no change	no change	down	down	0.0577872	NULL	NULL	NULL
Q9RSP9	DR_2075	1.44618	NULL	1.5632	1.14693	21.235	14.7723	0.118062	1.55287	15.0198	14.6577	19.2688	19.5257	21.2183	14.9876	5.9379	10.9746	0.905482	4.63734	0.207776	0.386479	0.286854	-0.811281	no change	up	no change	no change	no change	no change	1.75942e-06	1	0	NULL
Q9RSQ2	DR_2072	0.0934115	0.044407	NULL	0.0316121	0.036826	0.122674	0.0217828	0.044286	0.0313225	0.0664165	0.0191015	0.011215	0.0580839	0.0846148	0.0510329	0.0607048	-2.09548	0.210786	-1.06073	-1.68883	0.545966	0.193111	down	no change	down	down	no change	no change	0.347593	NULL	NULL	NULL
Q9RSQ3	glmM	0.317156	0.232074	1.83752	1.51527	2.34011	1.73261	0.663195	0.301343	1.45862	1.21723	3.8432	1.46904	1.4277	2.19066	2.33392	1.53229	2.60988	2.89051	0.812429	0.989323	0.43534	0.530921	up	up	no change	no change	no change	no change	0.0452637	2	0	early_up
Q9RSQ4	DR_2070	96.2919	82.3353	85.8681	96.0029	35.8801	46.5484	54.3753	56.3753	66.0118	113.109	61.2759	68.8954	28.1597	37.094	32.1292	44.4557	0.0259637	-1.11574	-0.689638	-0.460525	-1.4568	-1.2258	no change	down	no change	no change	down	down	0.145793	NULL	NULL	NULL
Q9RSQ5	ligA	0.716932	0.882485	0.8267	1.26831	1.07921	1.4501	1.01003	1.83181	0.693533	0.781631	0.785889	1.01364	1.34673	1.54104	0.478334	0.967567	0.389411	0.661197	0.829277	0.286741	0.96908	-0.0289064	no change	no change	no change	no change	no change	no change	0.0142438	0	0	NULL
Q9RSQ6	DR_2068	NULL	NULL	NULL	NULL	NULL	NULL	0.18977	0.0684887	NULL	NULL	NULL	NULL	NULL	NULL	NULL	NULL	0	0	7.66542	0	0	0	no change	no change	up	no change	no change	no change	0.000124847	1	0	NULL
Q9RSQ7	nusB	0.150903	0.0303086	0.485343	NULL	4.38432	4.61519	0.180608	1.56763	0.0782875	0.160561	4.6152	1.39979	1.01433	0.545197	2.6388	1.34775	1.42322	5.6341	3.27015	4.65439	2.70694	4.06097	up	up	up	up	up	up	2.69623e-06	3	3	sustain_up
Q9RSQ8	DR_2066	0.205437	NULL	NULL	NULL	NULL	0.384887	0.25109	0.237124	NULL	NULL	0.113495	0.03556	NULL	0.141061	0.155225	0.174945	-7.33976	0.90366	1.24436	6.87244	6.79941	8.01981	down	no change	up	up	up	up	0.194093	NULL	NULL	NULL
Q9RSR1	pnp	19.8592	18.748	13.0604	14.4328	12.3002	10.0492	11.5376	9.51027	16.8112	18.6473	16.7563	13.4224	8.39696	7.37372	8.03025	6.96541	-0.489798	-0.788635	-0.875198	-0.2326	-1.16889	-1.24159	no change	no change	no change	no change	down	down	0.00238386	0	0	NULL
Q9RSR2	DR_2062	0.467269	0.827296	0.692489	0.961575	0.999018	0.639348	1.43899	0.442301	0.127521	0.203978	0.563213	1.91622	0.18532	0.136717	0.542665	0.303456	0.353547	0.33979	0.539257	2.90293	-0.0417827	1.35186	no change	no change	no change	up	no change	up	0.0381915	0	2	late_up
Q9RSR3	DR_2061	NULL	1.16604	NULL	NULL	NULL	NULL	NULL	NULL	NULL	NULL	NULL	NULL	NULL	NULL	NULL	NULL	-9.84094	-9.84094	-9.84094	0	0	0	down	down	down	no change	no change	no change	0.0615447	NULL	NULL	NULL
Q9RSR5	glyQS	3.98751	3.33331	9.83271	7.13331	8.03913	11.7867	6.84678	8.06755	4.62736	5.32686	9.33285	9.01915	13.0535	17.3685	7.00677	7.85119	1.21257	1.43731	1.02662	0.882558	1.61174	0.577858	up	up	up	no change	up	no change	0.00496474	3	1	NULL
Q9RSR6	DR_2058	0.0335876	NULL	0.0937787	NULL	0.0280911	0.0358739	0.0818493	0.120967	0.0696498	0.0435996	0.0169896	0.0541449	0.123202	0.0580683	0.0916491	0.0420387	1.46402	0.902287	2.5671	-0.67088	0.678636	0.239365	up	no change	up	no change	no change	no change	0.0177023	2	0	early_up
Q9RSR7	DR_2057	29.3329	22.3945	26.1464	21.0379	23.7887	22.2578	35.6919	20.275	26.1916	18.8708	32.3324	21.4831	15.4796	16.288	23.8975	28.299	-0.132621	-0.167835	0.113647	0.256094	-0.504373	0.212026	no change	no change	no change	no change	no change	no change	0.19182	NULL	NULL	NULL
Q9RSR8	DR_2056	0.358425	0.332849	0.0616991	NULL	0.0526539	0.106947	0.141809	0.0128232	0.140757	0.0913188	0.11895	0.134438	0.326422	0.0742807	0.357294	0.279975	-3.47114	-2.11479	-2.16042	0.126756	0.787938	1.45731	down	down	down	no change	no change	up	1.07939e-05	0	1	NULL
Q9RSR9	DR_2055	10.5994	8.73445	7.62464	7.66507	4.01886	6.49005	4.48984	4.298	12.4773	12.2337	6.60103	6.81293	4.52853	6.37988	4.84281	4.79505	-0.338564	-0.879513	-1.13755	-0.881415	-1.17971	-1.35837	no change	no change	down	no change	down	down	0.0013871	0	0	NULL
Q9RSS2	DR_2052	2.18956	1.39122	1.63476	2.76187	1.16967	1.56532	1.57846	2.03074	1.35787	1.58626	1.76996	1.80475	1.61944	1.01051	1.35851	1.06193	0.296126	-0.388732	0.0114044	0.279985	-0.162804	-0.282576	no change	no change	no change	no change	no change	no change	0.472665	NULL	NULL	NULL
Q9RSS3	DR_2051	2.70645	2.36763	2.17833	1.25896	0.849468	1.5513	1.44533	1.52787	2.00698	2.06828	2.93917	2.61284	1.55774	1.78405	3.29619	1.68364	-0.561874	-1.07965	-0.771129	0.446116	-0.286274	0.289204	no change	down	no change	no change	no change	no change	0.00643325	0	0	NULL
Q9RSS4	rpmG	80.6055	135.227	10.4565	10.9798	0.494204	1.44768	NULL	NULL	48.4368	104.839	NULL	5.35946	1.47827	10.1942	0.174263	0.896691	-3.33179	-6.79632	-17.3723	-4.83772	-3.71494	-7.16109	down	down	down	down	down	down	0.156369	NULL	NULL	NULL
Q9RSS6	nusG	6.26631	6.43152	8.27575	0.803754	8.25161	2.1826	0.0208197	12.3158	7.20517	7.80131	5.62132	5.10299	1.43843	5.13267	0.541912	3.70056	-0.483897	-0.283261	-0.0416351	-0.4847	-1.19138	-1.82261	no change	no change	no change	no change	down	down	0.385256	NULL	NULL	NULL
Q9RSS7	rplK	75.5751	31.392	1.55729	3.65351	0.163359	5.69252	12.6532	13.5242	115.105	60.2728	35.5745	20.7385	22.9018	19.7347	14.9229	18.525	-4.35952	-4.19114	-2.03077	-1.63893	-2.0403	-2.39048	down	down	down	down	down	down	0.24411	NULL	NULL	NULL
Q9RSS8	rplA	159.379	162.299	68.1937	74.8031	15.7035	46.5007	16.2569	11.4486	81.9959	105.553	34.995	33.4371	47.6922	48.3576	19.3147	15.7269	-1.16963	-2.37053	-3.53737	-1.45452	-0.965412	-2.42013	down	down	down	down	no change	down	5.47409e-08	0	0	NULL
Q9RSS9	rplJ	86.873	81.2411	18.5967	6.15686	28.2258	23.5849	28.4001	24.6885	125.878	85.7122	43.3385	38.6806	36.4171	29.2863	21.5898	25.1749	-2.76374	-1.69812	-1.66297	-1.36724	-1.68723	-2.17778	down	down	down	down	down	down	0.0111249	0	0	NULL
Q9RST0	rplL	0.0812299	0.887243	1.01542	1.57431	1.37589	2.02526	1.02936	8.53522	0.39285	0.373281	1.66098	5.87271	0.19183	2.63563	0.273566	4.90251	1.41902	1.81224	3.30392	3.29769	1.88384	2.75619	up	up	up	up	up	up	0.204407	NULL	NULL	NULL
Q9RST1	DR_2042	1.55921	1.71175	1.29948	1.32602	2.70539	2.78589	5.05784	5.16692	1.40706	1.48598	1.5691	1.20748	2.2983	2.45912	2.64584	2.09211	-0.317126	0.747427	1.64428	-0.0592855	0.717587	0.71167	no change	no change	up	no change	no change	no change	3.94113e-12	1	0	NULL
Q9RST2	DR_2041	2.99214	2.28675	2.34244	1.92941	4.22432	3.40651	6.6723	5.84489	4.20069	3.30886	3.3778	2.38241	3.64554	3.09239	4.51363	2.42669	-0.305373	0.531607	1.24561	-0.382606	-0.156421	-0.113724	no change	no change	up	no change	no change	no change	2.5709e-05	1	0	NULL
Q9RST3	DR_2040	0.0965334	0.308958	0.228668	NULL	0.267937	0.392744	0.17879	0.0904701	0.206502	NULL	0.292236	0.577497	0.281146	0.553788	0.315248	0.533854	-0.822408	0.704283	-0.59067	2.06998	2.01107	2.03534	no change	no change	no change	up	up	up	0.0123371	0	3	late_up
Q9RST7	DR_2036	6.24157	6.87419	3.6651	5.15576	2.30586	2.37288	6.29261	6.94201	4.70208	4.08371	3.02149	2.80288	2.86983	3.76227	3.32969	2.40001	-0.57231	-1.48711	0.0130148	-0.593068	-0.405706	-0.616711	no change	down	no change	no change	no change	no change	2.35975e-07	0	0	NULL
Q9RST8	DR_2035	0.300221	0.163862	0.0972556	0.307037	0.0658153	NULL	0.389455	0.464253	0.0275263	NULL	0.1606	0.0378342	0.352745	0.141184	0.262739	0.0618317	-0.198982	-2.80401	0.87936	2.81682	4.13247	3.52669	no change	down	no change	up	up	up	0.000157807	0	3	late_up
Q9RST9	DR_2034	NULL	NULL	0.021885	NULL	0.0183333	0.0317228	0.0109231	0.044611	NULL	NULL	NULL	NULL	0.0104956	NULL	0.0526643	0.0345854	4.14595	5.29822	5.44805	0	3.12934	6.09982	up	up	up	no change	up	up	0.0119041	3	2	sustain_up
Q9RSU0	DR_2033	13.1258	14.3676	22.1436	25.2749	23.675	13.933	38.8994	37.7705	11.3849	8.49266	23.1873	20.6778	22.0973	23.4147	25.0042	21.8722	0.786367	0.451955	1.47958	1.14193	1.19511	1.23772	no change	no change	up	up	up	up	5.75399e-06	1	3	NULL
Q9RSU1	DR_2032	NULL	NULL	NULL	NULL	0.0663963	0.38966	0.447062	0.108427	NULL	NULL	NULL	NULL	NULL	NULL	0.200083	0.0368913	0	8.48581	8.77036	0	0	7.54133	no change	up	up	no change	no change	up	0.0898908	NULL	NULL	NULL
Q9RSU2	DR_2031	0.83056	0.853599	0.570741	0.474155	0.690516	0.699897	0.881672	0.34108	0.731622	0.893261	0.589146	0.80049	0.693433	0.446252	0.554609	0.550413	-0.688668	-0.276515	-0.461895	-0.225628	-0.511701	-0.556261	no change	no change	no change	no change	no change	no change	0.184369	NULL	NULL	NULL
Q9RSU3	DR_2030	NULL	NULL	NULL	NULL	0.647206	0.571969	0.0626071	0.607628	NULL	NULL	9.02269	0.234926	0.0661724	0.156218	0.568567	1.39253	0	9.90443	9.04127	12.8292	7.44969	10.5902	no change	up	up	up	up	up	0.045421	2	3	sustain_up
Q9RSU4	DR_2029	0.0622566	NULL	NULL	0.0683842	0.0942403	0.177627	0.113151	0.134561	NULL	NULL	0.0329503	0.0419948	0.0670806	0.151886	0.102753	0.149394	0.134128	2.11194	1.9777	5.88051	7.42731	7.63087	no change	up	up	up	up	up	0.61311	NULL	NULL	NULL
Q9RSU6	purN	0.031222	NULL	0.259802	0.120317	0.552306	0.615701	0.40917	0.298868	0.0677202	0.101132	0.36852	0.224673	1.97521	1.57189	0.647489	0.363099	3.57672	5.19625	4.47409	1.81274	4.39281	2.58136	up	up	up	up	up	up	3.92743e-08	3	3	sustain_up
Q9RSU7	DR_2025	16.0322	11.848	16.2339	9.61428	28.0678	33.7461	12.7182	13.0046	15.051	12.143	21.6777	21.7337	18.7219	24.18	23.3651	18.9437	-0.109179	1.14869	-0.116195	0.674786	0.657755	0.637672	no change	up	no change	no change	no change	no change	4.21223e-06	1	0	NULL
Q9RSU8	DR_2024	1.03125	0.521423	0.190302	5.67126	2.65085	10.0055	2.00899	0.774842	0.664137	0.0820055	0.520231	7.44967	2.16098	1.77302	22.4553	12.204	1.91653	3.02704	0.84232	3.41704	2.39847	5.53765	up	up	no change	up	up	up	4.78791e-05	2	3	sustain_up
Q9RSV0	DR_2022	3.42503	3.25406	2.84857	2.36997	7.97766	7.57509	2.35352	1.90652	5.69167	4.08456	7.64317	9.11046	5.79239	4.23633	2.74974	2.03619	-0.356007	1.21945	-0.648785	0.777123	0.0367871	-1.03048	no change	up	no change	no change	no change	down	1.56871e-09	1	0	NULL
Q9RSV1	plsY1	18.5144	3.80976	6.91067	3.23452	NULL	2.05912	4.75078	4.72567	0.322084	1.60019	0.111554	1.84961	2.87817	2.43854	0.0903042	2.95656	-1.13781	-3.43806	-1.23619	0.0288987	1.46772	0.664514	down	down	down	no change	up	no change	0.0168743	0	1	NULL
Q9RSV3	DR_2019	0.383931	0.681914	0.404844	0.231491	0.416847	0.318422	0.432074	0.597921	0.996633	1.33086	0.509025	0.537552	0.977779	1.17475	0.62598	0.543881	-0.744141	-0.535654	-0.0493591	-1.1531	-0.112741	-0.992438	no change	no change	no change	down	no change	no change	6.42945e-05	0	0	NULL
Q9RSV4	DR_2018	NULL	NULL	NULL	NULL	NULL	NULL	NULL	NULL	0.486493	0.0329115	NULL	0.0488255	NULL	0.0265705	NULL	NULL	0	0	0	-3.39248	-4.25483	-8.67346	no change	no change	no change	down	down	down	0.0395443	0	0	NULL
Q9RSV5	DR_2017	1.15984	0.36183	0.127537	0.357858	1.19168	0.916355	0.408708	0.517525	0.096764	0.00443145	0.233317	0.718125	0.393266	0.414802	0.592576	0.946435	-1.64842	0.470245	-0.716206	3.23297	2.99733	3.92679	down	no change	no change	up	up	up	0.000171408	0	3	late_up
Q9RSV7	DR_2015	2.33087	2.31931	3.51361	2.68215	2.68044	2.16222	3.21006	2.20535	3.08191	3.74417	2.26298	2.59023	1.78099	2.40889	2.30952	2.01842	0.413996	0.0585144	0.219786	-0.49212	-0.704149	-0.657376	no change	no change	no change	no change	no change	no change	0.000439214	0	0	NULL
Q9RSV8	DR_2014	1.22487	0.782233	0.10708	0.466382	2.83605	1.20317	0.413435	0.879357	1.9586	2.53473	1.3515	0.441489	3.06612	2.36253	2.31078	1.75259	-1.80735	1.00896	-0.634624	-1.32541	0.272812	-0.145106	down	up	no change	down	no change	no change	0.279967	NULL	NULL	NULL
Q9RSV9	DR_2012	0.471811	0.304139	0.174246	0.0288325	0.236523	0.21609	0.0688444	NULL	0.162675	NULL	0.134794	0.0685399	0.521861	0.0919917	0.265239	0.19142	-1.93393	-0.777686	-3.48128	0.316227	1.91027	1.48349	down	no change	down	no change	up	up	0.00176459	0	2	late_up
Q9RSW0	trmD	0.157182	0.148583	1.14269	0.400169	0.70455	0.888962	0.386034	0.0567528	0.519924	0.566896	0.763677	1.21452	1.32768	1.54208	0.967349	0.85201	2.33511	2.38172	0.534191	0.864076	1.40082	0.743317	up	up	no change	no change	up	no change	0.103677	NULL	NULL	NULL
Q9RSW1	rimM	3.06653	2.4371	3.98939	4.14457	0.714963	1.9006	3.50233	4.07206	3.20059	2.95111	3.18081	3.56605	4.65496	2.83268	3.1617	3.04318	0.563575	-1.07326	0.460746	0.13323	0.283525	0.0124171	no change	down	no change	no change	no change	no change	2.01317e-05	0	0	NULL
Q9RSW2	DR_2009	20.271	23.0578	7.27531	6.21141	0.731299	0.935779	0.287668	NULL	11.8492	18.6651	0.96142	0.169432	1.01357	0.139614	0.389872	0.199445	-1.68379	-4.69993	-7.23159	-4.754	-4.72579	-5.6943	down	down	down	down	down	down	0.000367622	0	0	NULL
Q9RSW3	asd	1.38109	0.854754	2.02876	1.4647	3.9762	3.90211	6.42712	6.8572	1.70263	0.99018	3.63569	2.4861	3.90314	3.81965	6.03743	4.84045	0.64384	1.81707	2.57084	1.18484	1.52001	2.01421	no change	up	up	up	up	up	0.000168413	2	3	sustain_up
Q9RSW4	DR_2007	NULL	NULL	NULL	NULL	NULL	0.0669788	NULL	0.0404098	NULL	NULL	0.038398	NULL	NULL	NULL	NULL	NULL	0	5.73201	5.01191	4.9394	0	0	no change	up	up	up	no change	no change	0.0448062	2	1	NULL
Q9RSW5	DR_2006	NULL	0.115931	0.779794	0.0625241	0.225256	0.186656	0.430883	0.492524	0.359143	0.509053	NULL	0.818017	0.0967119	0.581162	1.04316	0.56854	2.8532	1.82117	2.9858	-0.0847667	-0.357003	0.892494	up	up	up	no change	no change	no change	0.437569	NULL	NULL	NULL
Q9RSW7	rplT	434.177	237.334	389.777	332.219	110.071	43.8753	38.7879	30.4054	246.319	135.671	234.146	246.974	110.347	71.2756	65.0547	45.6968	0.10458	-2.12498	-3.27871	0.33286	-1.0726	-1.78621	no change	down	down	no change	down	down	0.00613607	0	0	NULL
Q9RSW8	DR_2003	1.77345	1.11867	2.09753	1.49032	0.943273	0.560366	2.59241	2.33183	1.26788	0.595915	2.06075	0.918768	1.7393	0.658088	1.96507	0.651076	0.310991	-0.94367	0.767771	0.67684	0.363221	0.489202	no change	no change	no change	no change	no change	no change	0.034155	0	0	NULL
Q9RSX1	DR_2000	0.0624334	NULL	NULL	NULL	0.143245	0.0340027	NULL	NULL	0.403733	0.0705067	NULL	NULL	0.0104967	NULL	0.0130828	NULL	-5.63161	1.49076	-5.63161	-8.54222	-5.41273	-5.11138	down	up	down	down	down	down	0.00769122	1	0	NULL
Q9RSX3	DR_1997	4.22372	5.5695	5.6686	2.0201	2.1086	1.42153	0.276811	2.35982	5.354	1.54012	4.74447	4.28509	3.96308	1.44381	3.77346	1.17141	-0.349044	-1.47206	-1.89309	0.389289	-0.350566	-0.479436	no change	down	down	no change	no change	no change	0.265576	NULL	NULL	NULL
Q9RSX4	DR_1995	0.248614	0.799973	0.468888	0.508738	0.515227	0.717412	0.875562	1.17197	0.230828	0.66975	0.207588	0.647648	0.103033	0.907009	0.71551	0.850312	-0.101093	0.233304	0.965439	-0.0745272	0.165494	0.797998	no change	no change	no change	no change	no change	no change	0.88242	NULL	NULL	NULL
Q9RSX5	DR_1994	6.62033	5.73588	NULL	NULL	0.541471	0.378204	9.08843	8.14893	1.59846	5.52905	6.58863	NULL	3.89457	2.74149	9.53633	0.339452	-13.2457	-3.74797	0.480303	-0.113282	-0.103072	0.470496	down	down	no change	no change	no change	no change	0.0209028	0	0	NULL
Q9RSX6	DR_1993	0.31771	0.183409	0.371578	0.312661	0.719763	1.07972	0.661081	0.980342	0.455284	0.340335	0.721655	0.374408	0.857049	0.786445	0.670332	0.537577	0.449347	1.84435	1.71172	0.462182	1.04662	0.602363	no change	up	up	no change	up	no change	0.0173609	2	1	NULL
Q9RSX7	DR_1992	NULL	NULL	NULL	NULL	NULL	NULL	1.23815	1.02093	NULL	0.155698	0.394581	0.763536	0.680857	NULL	NULL	0.470164	0	0	10.7943	2.88908	2.12407	1.59048	no change	no change	up	up	up	up	5.48892e-06	1	3	NULL
Q9RSX8	truD	0.105251	0.11986	0.0267275	0.0189709	0.0233553	0.331446	0.100934	0.0764204	0.0753128	0.038918	0.0889703	0.0725908	0.0170001	0.0390641	0.0999029	0.0598132	-2.30042	0.656372	-0.344005	0.500128	-1.0268	0.483558	down	no change	no change	no change	down	no change	0.0350472	0	0	NULL
Q9RSX9	DR_1990	NULL	0.0440257	NULL	NULL	NULL	NULL	0.272538	0.298083	NULL	NULL	0.282819	0.165381	0.29167	0.0612572	0.0449445	NULL	-5.13371	-5.13371	3.67542	8.46074	8.11597	5.16309	down	down	up	up	up	up	4.49841e-07	1	3	NULL
Q9RSY0	DR_1989	0.0515919	NULL	NULL	NULL	NULL	0.0455497	NULL	NULL	0.912567	0.069094	0.0363701	NULL	0.118365	0.119234	0.0296482	0.0127743	-5.35949	-0.177375	-5.35949	-4.72939	-2.0467	-4.53232	down	no change	down	down	down	down	0.0595133	NULL	NULL	NULL
Q9RSY1	DR_1988	5.9977	5.94128	4.37628	4.71903	5.03382	6.52456	7.35906	9.06417	4.08492	4.55551	6.80354	8.33216	4.60989	5.68414	4.69716	5.61387	-0.392484	-0.0467393	0.460058	0.80878	0.252633	0.255013	no change	no change	no change	no change	no change	no change	4.35827e-07	0	0	NULL
Q9RSY2	DR_1987	1.43528	1.97587	6.21747	87.6629	7.21026	2.05254	10.3213	10.7966	1.13035	2.07021	5.11186	4.95768	2.97124	0.669277	0.339936	4.71993	4.78249	1.44119	2.63014	1.65361	0.185824	0.660778	up	up	up	up	no change	no change	0.0800968	NULL	NULL	NULL
Q9RSY3	DR_1986	3.58007	6.47985	11.6204	1.02113	6.59219	6.46802	3.05119	4.77259	5.76705	3.49334	3.00616	4.46925	3.09948	2.67503	6.46736	4.83979	0.32955	0.37656	-0.362681	-0.308919	-0.681374	0.288092	no change	no change	no change	no change	no change	no change	0.147034	NULL	NULL	NULL
Q9RSY4	DR_1985	0.251177	0.106233	0.307774	0.47219	0.31114	0.479034	0.128008	0.103784	0.261922	0.72885	0.0159759	0.50998	0.271883	0.583879	0.189996	0.334683	1.12583	1.14459	-0.624742	-0.913611	-0.211342	-0.917117	up	up	no change	no change	no change	no change	0.0918316	NULL	NULL	NULL
Q9RSY5	tdk	0.0610079	NULL	NULL	NULL	0.38527	0.322211	NULL	0.209898	0.387473	NULL	0.0726818	NULL	0.202585	0.0501159	0.261039	0.0824085	-5.59863	3.52066	1.77202	-2.40423	-0.619032	-0.176371	down	up	up	down	no change	no change	0.0112252	2	0	early_up
Q9RSY6	DR_1983	230.884	270.02	263.06	215.885	108.488	138.595	104.977	132.256	186.056	221.833	206.96	220.542	111.478	95.8999	88.4543	105.954	-0.0646714	-1.01954	-1.07823	0.0677533	-0.975916	-1.06909	no change	down	down	no change	no change	down	0.424589	NULL	NULL	NULL
Q9RSY7	DR_1982	7.35546	8.63658	5.79488	6.74442	10.526	7.72968	4.80112	3.19241	13.7249	14.1621	9.4285	14.4985	4.83165	8.14578	6.14449	6.08943	-0.350897	0.190991	-1.00045	-0.22095	-1.10359	-1.18871	no change	no change	down	no change	down	down	5.37924e-05	0	0	NULL
Q9RSY8	DR_1981	0.213748	0.300523	NULL	NULL	NULL	NULL	0.686638	1.07	0.105733	NULL	0.482731	0.0229655	0.542932	0.526335	0.924575	0.657151	-8.65913	-8.65913	1.77222	2.24919	3.32947	3.89434	down	down	up	up	up	up	0.000229266	1	3	NULL
Q9RSY9	DR_1980	0.857597	1.68803	3.23606	2.18189	9.33646	8.63406	4.81765	3.48081	1.79323	2.10663	4.01489	6.53164	3.36473	3.62988	5.26424	7.98935	1.08973	2.81954	1.70482	1.43527	0.842822	1.76489	up	up	up	up	no change	up	1.52915e-07	3	2	sustain_up
Q9RSZ0	DR_1979	1.78606	2.06987	0.403821	NULL	0.37741	0.294114	0.0186211	0.0180881	3.06618	3.04403	0.333541	0.277377	0.0785698	1.13523	0.130054	0.0519483	-3.25302	-2.52157	-6.71479	-3.32217	-2.33169	-5.0692	down	down	down	down	down	down	0.00124196	0	0	NULL
Q9RSZ1	DR_1978	0.621683	0.449432	0.410863	0.395201	0.966991	0.0919549	0.14813	0.705329	1.9485	2.17948	0.774603	0.542577	0.496146	0.755715	0.13092	0.437959	-0.410149	-0.0164846	-0.32772	-1.64798	-1.72136	-2.85924	no change	no change	no change	down	down	down	1.35907e-05	0	0	NULL
Q9RSZ2	DR_1977	0.0741967	NULL	0.268281	0.29406	0.677127	0.749211	0.70812	0.679102	0.379971	0.312138	0.139288	0.208794	4.31083	0.991768	0.606632	0.690433	2.9097	4.2525	4.21239	-0.991569	2.93763	0.906181	up	up	up	no change	up	no change	0.0263594	3	1	NULL
Q9RSZ3	mutS	1.10252	0.549161	0.547671	0.562679	3.38844	3.13531	1.18585	0.479087	0.562635	0.380159	3.78141	0.674062	0.719778	2.57613	1.25633	2.2316	-0.572923	1.98176	0.0115294	2.24056	1.80566	1.88736	no change	up	no change	up	up	up	0.00386474	1	3	NULL
Q9RSZ5	lon	3.91241	4.52593	2.32911	2.44159	3.14003	3.50933	2.57304	2.36512	4.91277	5.93186	4.18578	2.85883	4.03655	4.95364	3.10805	3.01313	-0.822759	-0.343743	-0.772987	-0.62239	-0.270556	-0.825099	no change	no change	no change	no change	no change	no change	0.435126	NULL	NULL	NULL
Q9RSZ6	clpX	2.13348	2.826	5.55871	5.11851	7.26949	8.24374	7.63153	10.7211	1.82971	2.33954	4.85933	6.26812	2.89507	3.05175	5.29799	5.87386	1.10628	1.64524	1.88773	1.41627	0.512333	1.42201	up	up	up	up	no change	up	9.65254e-06	3	2	sustain_up
Q9RSZ7	clpP	2.92057	2.88588	6.05675	4.84417	6.15179	6.60314	12.6824	16.34	2.77097	1.16787	8.8398	3.82503	7.29762	4.8997	13.4261	8.80785	0.908721	1.13533	2.32144	1.68498	1.63072	2.49692	no change	up	up	up	up	up	0.122987	NULL	NULL	NULL
Q9RSZ8	DR_1971	0.630636	0.944811	1.21512	0.317586	0.876639	0.883712	0.394105	0.386764	0.390985	0.37316	0.680434	1.74408	0.189162	0.286145	0.663705	0.889996	-0.0396795	0.160101	-1.01261	1.66578	-0.684986	1.02379	no change	no change	down	up	no change	up	0.0032533	0	2	late_up
Q9RSZ9	DR_1970	1.0286	0.496126	7.51749	4.37416	4.92155	5.64515	8.13535	9.37889	1.62605	2.06671	6.57302	9.25019	3.44609	2.60486	5.05741	5.6939	2.96333	2.7929	3.52191	2.09927	0.712464	1.54174	up	up	up	up	no change	up	5.68051e-05	3	2	sustain_up
Q9RT00	DR_1969	3.40082	3.0679	4.43369	3.67494	0.194052	0.0154516	2.02798	2.00711	5.04296	4.40424	3.71525	3.27176	3.23966	1.99353	0.610711	1.14551	0.325977	-4.94843	-0.680881	-0.435211	-0.852199	-2.42742	no change	down	no change	no change	no change	down	5.37334e-08	0	0	NULL
Q9RT01	DR_1968	0.490437	0.154081	0.39655	0.729614	NULL	1.83756	0.245821	0.0206569	2.27788	2.61379	1.24813	1.14154	0.923443	0.76023	0.179191	0.381781	0.805124	1.51199	-1.27421	-1.03352	-1.53871	-3.12433	no change	up	down	down	down	down	0.000203865	1	0	NULL
Q9RT02	DR_1967	45.6195	74.1657	53.5562	52.3504	47.9833	35.4667	59.5365	37.6087	41.5436	57.1139	54.1522	61.6884	40.9763	44.1176	44.3668	42.4666	-0.177658	-0.521467	-0.302235	0.231639	-0.213373	-0.18418	no change	no change	no change	no change	no change	no change	0.322156	NULL	NULL	NULL
Q9RT03	DR_1966	0.0551816	NULL	NULL	NULL	0.271367	0.175252	0.0287372	NULL	0.171398	NULL	0.0305723	0.0842102	0.0723226	0.0772139	1.84733	0.164605	-5.45539	3.00025	-0.926219	-0.583795	-0.2022	3.54781	down	up	no change	no change	no change	up	0.0201814	1	1	NULL
Q9RT04	DR_1965	NULL	NULL	NULL	NULL	NULL	NULL	0.0564851	NULL	NULL	NULL	0.0413935	0.0614739	0.140253	0.0415161	0.102522	0.0218598	0	0	5.4887	6.33739	7.15871	6.61138	no change	no change	up	up	up	up	0.0436143	1	3	NULL
Q9RT05	DR_1964	0.176532	0.143778	0.172655	0.177762	0.494316	0.376331	0.378014	0.269077	0.214909	0.10416	0.272502	0.196311	0.182854	0.111833	0.359163	0.297982	0.129604	1.44262	1.0145	0.555142	-0.114687	1.04234	no change	up	up	no change	no change	up	6.38879e-06	2	1	NULL
Q9RT06	DR_1963	0.497064	0.0499606	0.065176	0.0219043	0.0609818	0.382904	0.283994	0.484524	0.0536606	NULL	0.13549	0.172772	0.158564	0.27335	0.064727	0.209034	-2.65119	-0.301417	0.490473	2.50522	2.99181	2.33398	down	no change	no change	up	up	up	0.0263162	0	3	late_up
Q9RT07	DR_1962	4.85512	5.03392	21.4476	9.23739	0.114722	0.061493	0.239376	0.176469	6.67705	7.74774	8.2639	8.9787	5.77481	7.43726	11.5071	0.062511	1.63363	-5.81042	-4.57171	0.257427	-0.126694	-0.318216	up	down	down	no change	no change	no change	0.00554671	1	0	NULL
Q9RT08	DR_1961	NULL	NULL	NULL	NULL	NULL	NULL	NULL	NULL	NULL	NULL	NULL	NULL	NULL	0.0601662	NULL	0.011233	0	0	0	0	5.5788	3.22188	no change	no change	no change	no change	up	up	0.0830824	NULL	NULL	NULL
Q9RT09	DR_1960	8.48997	9.41005	1.63186	0.96371	4.53561	3.3221	8.80942	3.67547	13.4566	8.33839	4.77889	3.67385	8.29352	7.59591	10.6501	7.19274	-2.78584	-1.18778	-0.519777	-1.36651	-0.45593	-0.288652	down	down	no change	down	no change	no change	0.680562	NULL	NULL	NULL
Q9RT11	DR_1958	3.49748	2.59797	1.44763	1.13022	1.73366	1.83363	0.523308	1.22477	3.21034	1.52962	1.01897	1.5256	2.11059	1.39194	1.88848	1.27076	-1.24157	-0.772908	-1.80197	-0.897453	-0.436478	-0.585298	down	no change	down	no change	no change	no change	0.0706516	NULL	NULL	NULL
Q9RT12	DR_1957	0.0609254	0.130007	0.361152	0.233198	0.0698263	0.0633289	0.0767841	0.107314	0.139691	0.133721	0.133601	0.136639	0.106599	0.0424233	0.126801	0.157677	1.63825	-0.519957	-0.0525898	-0.0168396	-0.875555	0.0572349	up	no change	no change	no change	no change	no change	2.7568e-05	1	0	NULL
Q9RT14	DR_1955	3.19271	4.16999	0.806801	0.513044	1.05002	0.861166	1.93359	1.46336	3.40923	1.46463	1.74559	3.44575	0.900162	0.493366	1.64309	1.5091	-2.47987	-1.94577	-1.11599	0.0910427	-1.80632	-0.628708	down	down	down	no change	down	no change	0.000461729	0	0	NULL
Q9RT16	DR_1953	0.0166118	NULL	NULL	NULL	0.00947792	NULL	0.0758849	0.086014	NULL	NULL	NULL	NULL	0.032534	0.0364194	0.011172	0.0830356	-3.76109	-0.770064	3.2306	0	5.7603	6.21052	down	no change	up	no change	up	up	0.0070979	1	2	NULL
Q9RT19	DR_1950	2.01838	2.16074	1.18986	0.854619	0.626154	0.786811	NULL	NULL	1.89875	2.91747	0.773882	0.669159	0.641981	1.22187	0.536183	0.755887	-1.03146	-1.56447	-11.6817	-1.73879	-1.36962	-1.89822	down	down	down	down	down	down	0.0161623	0	0	NULL
Q9RT21	tig	1.27841	0.879562	17.4306	17.6312	17.679	23.9818	1.99673	2.27908	1.90513	1.11874	14.4495	15.351	4.45619	2.10626	13.8676	13.7123	4.02215	4.27094	0.98652	3.30087	1.11784	3.18915	up	up	no change	up	up	up	7.05436e-12	2	3	sustain_up
Q9RT22	fabH2	4.41563	5.80079	7.65253	8.13839	6.48693	5.41896	5.84912	8.21266	3.05487	5.86016	4.50634	3.36148	4.42351	4.65553	5.30163	4.62488	0.628205	0.220786	0.460889	-0.180274	0.0263004	0.155047	no change	no change	no change	no change	no change	no change	0.0108291	0	0	NULL
Q9RT23	fabH1	13.534	24.4512	21.2311	22.8266	14.9886	17.4282	14.1247	25.1963	25.3972	18.1738	20.718	22.2516	26.2688	23.8687	17.4124	13.9174	0.213961	-0.228692	0.0498667	-0.0200532	0.202523	-0.47583	no change	no change	no change	no change	no change	no change	0.0185667	0	0	NULL
Q9RT24	DR_1945	1.82635	1.3887	4.9637	2.16805	8.78659	9.96989	5.64813	4.19104	2.5659	2.10427	6.42854	7.10464	10.1862	9.11445	5.86337	5.43914	1.14941	2.54448	1.61369	1.53495	2.0471	1.27509	up	up	up	up	up	up	0.00510976	3	3	sustain_up
Q9RT26	DR_1943	14.1878	4.16801	9.16357	7.63931	11.4514	9.67063	23.4645	28.0641	12.733	14.217	22.4008	4.60371	20.0286	7.8145	13.536	22.8958	-0.127533	0.20251	1.48913	0.00291346	0.0470315	0.434909	no change	no change	up	no change	no change	no change	0.0980397	NULL	NULL	NULL
Q9RT27	acpP	35.7482	31.4742	191.636	42.7089	161.709	190.079	106.579	126.859	44.9294	53.4543	145.94	142.749	85.8289	123.174	85.2038	102.035	1.80162	2.38769	1.79603	1.55302	1.08703	0.928387	up	up	up	up	up	no change	0.0318468	3	2	sustain_up
Q9RT28	DR_1941	9.28283	2.742	6.11743	4.36327	3.30171	4.45583	2.75739	3.92348	4.16135	2.85998	4.67763	6.34717	2.87817	3.71587	3.0294	3.04919	-0.198282	-0.632346	-0.84791	0.650937	-0.0905815	-0.208008	no change	no change	no change	no change	no change	no change	0.311147	NULL	NULL	NULL
Q9RT29	DR_1940	1.21515	1.11955	0.948721	0.99551	1.84604	1.9277	0.610199	0.433389	1.64675	1.81823	1.82087	1.56917	2.41368	1.51946	1.7358	2.03452	-0.264041	0.692757	-1.16169	-0.0315464	0.182834	0.121841	no change	no change	down	no change	no change	no change	0.000142847	0	0	NULL
Q9RT30	DR_1938	1.0121	0.819955	1.27373	0.677762	1.16597	1	1.21229	1.35379	0.451078	0.664857	1.0365	0.981523	0.344181	0.613371	0.872818	0.984126	0.0911081	0.241546	0.4861	0.854689	-0.22083	0.734678	no change	no change	no change	no change	no change	no change	0.00695472	0	0	NULL
Q9RT31	DR_1937	NULL	NULL	NULL	NULL	NULL	NULL	NULL	NULL	NULL	NULL	NULL	NULL	0.0316979	NULL	NULL	NULL	0	0	0	0	4.66772	0	no change	no change	no change	no change	up	no change	0.0615447	NULL	NULL	NULL
Q9RT32	DR_1936	49.3553	68.6672	109.66	116.614	20.8583	38.6906	152.435	165.439	23.0858	32.8708	20.7684	21.5787	29.5997	42.1196	43.2768	42.9729	0.939009	-0.986913	1.42939	-0.402044	0.358055	0.624212	no change	no change	up	no change	no change	no change	2.08515e-11	1	0	NULL
Q9RT33	DR_1935	1.18841	1.23265	1.12005	1.74781	1.61066	1.53114	2.21675	2.40777	1.69177	2.02085	1.56501	2.19415	2.00741	2.27801	1.48562	1.05477	0.244338	0.375952	0.933663	0.0179696	0.206998	-0.547391	no change	no change	no change	no change	no change	no change	2.32524e-06	0	0	NULL
Q9RT35	DR_1931	22.9682	30.0442	30.9119	22.1774	18.2979	22.7745	42.7117	45.7297	11.518	12.1523	18.1951	24.1017	22.5953	17.47	31.3937	23.0042	0.00209062	-0.368161	0.738391	0.837471	0.759278	1.20047	no change	no change	no change	no change	no change	up	0.000571392	0	1	NULL
Q9RT36	DR_1930	0.104521	0.215109	0.633665	0.241001	0.109751	NULL	0.348749	2.29864	0.0546957	0.134114	0.379285	0.168794	0.491368	0.294429	0.245551	0.352713	1.45233	-1.53383	3.0501	1.53745	2.05722	1.66385	up	down	up	up	up	up	0.0297241	2	3	sustain_up
Q9RT37	DR_1929	4.14408	7.05702	5.42986	5.07184	2.38926	5.94771	14.4737	16.1243	2.97804	5.47806	5.48925	7.34733	6.21698	9.59319	5.5995	6.66329	-0.0930177	-0.426047	1.4498	0.602197	0.902789	0.536223	no change	no change	up	no change	no change	no change	5.08602e-07	1	0	NULL
Q9RT38	glpK	25.2308	18.6923	20.9004	29.8093	26.4945	26.2014	26.6262	25.8562	14.343	11.9123	16.2869	14.6242	10.3029	9.64274	17.1587	14.1369	0.207284	0.262713	0.256853	0.235514	-0.396535	0.253354	no change	no change	no change	no change	no change	no change	0.0291852	0	0	NULL
Q9RT40	DR_1926	NULL	NULL	NULL	NULL	NULL	NULL	NULL	0.0990686	0.143832	NULL	NULL	NULL	NULL	0.0176283	0.05088	NULL	0	0	6.29233	-6.82735	-2.98365	-1.48766	no change	no change	up	down	down	down	0.103122	NULL	NULL	NULL
Q9RT41	DR_1925	2.91721	1.67145	3.28051	2.44026	6.26968	4.6273	1.14903	0.968724	0.824984	0.516552	1.42822	1.08289	1.72318	0.566536	2.61792	1.35898	0.318138	1.24779	-1.11553	0.90444	0.771284	1.56776	no change	up	down	no change	no change	up	1.69996e-06	1	1	NULL
Q9RT42	DR_1924	0.135205	0.770815	0.241122	0.313552	0.563561	0.213946	0.48065	0.939213	NULL	0.0417348	0.258999	0.727869	1.13592	1.25272	1	1.0455	-0.707903	-0.220686	0.648138	4.54171	5.81697	5.59323	no change	no change	no change	up	up	up	0.000168963	0	3	late_up
Q9RT43	DR_1923	0.20486	0.379977	0.292171	NULL	0.21589	NULL	0.948349	0.40425	0.0232235	0.0197229	0.282231	0.0953271	2.06171	0.258828	1.38108	0.173129	-0.998081	-1.4335	1.20963	3.13609	5.75578	5.17751	no change	down	up	up	up	up	0.0610649	NULL	NULL	NULL
Q9RT44	sbcC	0.290425	0.152878	0.195145	0.387479	0.461757	0.865352	0.813497	0.742487	0.341757	0.572753	0.38115	0.840018	0.845308	0.888747	0.681742	1.04194	0.394271	1.58192	1.81146	0.417192	0.923079	0.914421	no change	up	up	no change	no change	no change	0.544893	NULL	NULL	NULL
Q9RT45	sbcD	0.308797	0.297499	0.252569	0.503585	2.22053	1.43115	0.564275	0.62807	0.338571	0.414241	1.5408	1.08154	0.51235	1.03105	1.4744	1.48656	0.318658	2.59047	0.975707	1.80049	1.03575	1.9757	no change	up	no change	up	up	up	2.76859e-07	1	3	NULL
Q9RT46	DR_1920	NULL	0.148189	NULL	NULL	0.394252	0.299611	NULL	0.0254047	0.246842	0.252794	NULL	0.440074	0.0386437	0.0304004	0.0580681	NULL	-6.87021	2.22104	-2.51477	-0.18105	-2.85529	-3.08934	down	up	down	no change	down	down	0.000202734	1	0	NULL
Q9RT48	DR_1918	1.30946	0.659138	NULL	NULL	NULL	NULL	NULL	NULL	0.670519	0.3974	0.542122	NULL	NULL	NULL	0.798728	0.823137	-10.5957	-10.5957	-10.5957	-0.976422	-9.71333	0.602851	down	down	down	no change	down	no change	3.30919e-05	0	0	NULL
Q9RT49	DR_1917	NULL	2.92829	0.0451864	NULL	NULL	0.584233	0.00919258	NULL	NULL	0.130186	NULL	NULL	0.0320968	0.311061	0.0129801	0.328576	-5.99817	-2.32419	-8.21917	-6.68421	1.39127	1.38451	down	down	down	down	up	up	0.081752	NULL	NULL	NULL
Q9RT50	recG	0.0716461	0.0378488	0.199918	0.123114	0.179182	0.0257465	0.305515	0.147698	0.489885	0.150862	0.0853804	0.0534108	0.301339	0.0949249	0.227869	0.0677532	1.56081	0.904253	2.04933	-2.20684	-0.693295	-1.116	up	no change	up	down	no change	down	0.00752508	2	0	early_up
Q9RT53	gyrA	9.04132	10.9685	7.83785	10.5639	9.48326	10.2291	9.77326	9.14555	11.6135	14.9627	8.77376	11.0746	9.77441	5.60142	10.3153	8.18728	-0.120871	-0.0216084	-0.0808895	-0.421112	-0.789469	-0.522403	no change	no change	no change	no change	no change	no change	0.0136071	0	0	NULL
Q9RT55	DR_1911	0.211734	0.173459	0.831894	NULL	0.180481	0.227939	0.539295	0.206417	NULL	NULL	0.474167	0.184655	0.102118	NULL	0.207011	0.156576	1.11192	0.0844746	0.953038	9.01649	6.3358	8.1589	up	no change	no change	up	up	up	0.941534	NULL	NULL	NULL
Q9RT56	DR_1910	NULL	0.00435207	NULL	NULL	NULL	NULL	NULL	NULL	NULL	NULL	NULL	NULL	0.0990737	0.0503037	0.0339766	0.0285338	-1.97125	-1.97125	-1.97125	0	6.87556	5.61877	down	down	down	no change	up	up	3.03685e-06	0	2	late_up
Q9RT57	lutC	1.15689	0.913682	0.680516	0.68965	6.74938	5.32276	4.66738	3.86686	1.30325	0.110402	2.2374	0.881875	13.0932	8.45748	7.06479	5.48062	-0.59568	2.54358	2.04323	1.14178	3.93023	3.14966	no change	up	up	up	up	up	0.00235299	2	3	sustain_up
Q9RT58	DR_1907	0.384496	0.515	1.13935	0.97777	2.059	1.08585	0.925137	0.16515	0.229385	0.198157	0.67363	1.41431	0.893379	1.0836	1.45908	2.07862	1.23491	1.8058	0.277519	2.28794	2.20916	3.04867	up	up	no change	up	up	up	0.000261161	2	3	sustain_up
Q9RT59	DR_1906	2.3122	1.41487	2.719	1.4106	1.944	1.31016	2.97049	3.30546	0.708105	0.898904	2.75219	1.23328	1.63578	4.64354	2.22263	2.77101	0.147962	-0.195753	0.751791	1.31037	1.96623	1.63572	no change	no change	no change	up	up	up	0.0237464	0	3	late_up
Q9RT60	DR_1905	1.51604	1.4562	1.56221	0.311262	2.36739	0.243424	1.05649	0.780676	2.49616	1.91858	3.38584	1.912	1.57212	2.23418	1.55165	0.604991	-0.66583	-0.187047	-0.694063	0.263076	-0.213941	-1.03354	no change	no change	no change	no change	no change	down	0.145499	NULL	NULL	NULL
Q9RT62	DR_1903	0.950137	1.51784	1.08042	1.20088	0.304488	0.606191	0.938626	1.29536	2.14467	1.37821	1.6166	0.567513	1.06164	0.843151	0.81055	0.914002	-0.113473	-1.43832	-0.143711	-0.689705	-0.887123	-1.03053	no change	down	no change	no change	no change	down	0.0510361	NULL	NULL	NULL
Q9RT63	recD	0.141666	0.323449	0.164105	0.136629	0.40357	0.218462	0.263118	0.222535	0.0417894	0.065338	0.102225	0.179249	0.263792	0.231777	0.258054	0.145925	-0.629104	0.419402	0.0623402	1.39368	2.20976	1.91495	no change	no change	no change	up	up	up	0.0661275	NULL	NULL	NULL
Q9RT66	DR_1899	0.0805349	NULL	NULL	NULL	NULL	NULL	0.267069	NULL	NULL	NULL	NULL	NULL	0.206964	NULL	NULL	NULL	-5.99564	-5.99564	1.72161	0	7.35041	0	down	down	up	no change	up	no change	0.0303223	1	1	NULL
Q9RT67	DR_1898	0.0643478	0.0796303	0.138405	0.165344	0.201729	0.112833	0.374059	0.256047	0.0813477	0.0987751	0.135226	0.0563309	0.167027	0.128477	0.107409	0.0858739	1.07703	1.1275	2.12975	0.0887948	0.714193	0.101733	up	up	up	no change	no change	no change	2.9362e-05	3	0	early_up
Q9RT68	DR_1897	NULL	NULL	0.417631	0.639404	1.73596	2.72762	1.80535	1.15726	0.0193382	0.0825769	2.47401	5.63444	0.910867	1.17591	5.57619	5.61616	9.69855	11.7767	11.1854	6.31399	4.35584	6.779	up	up	up	up	up	up	1.30462e-06	3	3	sustain_up
Q9RT69	DR_1896	2.70698	0.393727	5.15318	0.856386	0.182109	0.185213	NULL	0.137781	NULL	0.691947	0.488094	0.571693	0.225841	0.10235	0.28046	0.890682	0.954665	-3.07748	-4.4855	0.613714	-1.07745	0.757856	no change	down	down	no change	down	no change	0.0421665	0	0	NULL
Q9RT70	DR_1895	2.62422	2.54482	0.861962	3.18793	1.22345	1.34145	1.19438	1.29854	1.07552	1.87073	2.34834	4.04927	2.95028	3.94114	6.14328	9.68743	-0.352014	-1.01099	-1.05206	1.11865	1.22592	2.42577	no change	down	down	up	up	up	5.16745e-06	0	3	late_up
Q9RT71	DR_1894	1.94887	2.13777	1.58506	1.29349	2.45988	1.731	1.0633	0.479283	1.58263	2.16313	2.81294	2.46655	1.67491	1.87976	1.58284	1.78149	-0.505573	0.036336	-1.40557	0.495142	-0.0755454	-0.154937	no change	no change	down	no change	no change	no change	2.07056e-05	0	0	NULL
Q9RT72	DR_1893	40.5696	43.3032	10.0405	11.7586	18.2533	24.863	21.8308	21.4251	32.9546	36.7375	22.9832	17.3826	21.4969	30.1111	2.70556	15.9392	-1.94394	-0.959969	-0.955306	-0.787865	-0.433401	-1.90223	down	no change	no change	no change	no change	down	0.000113685	0	0	NULL
Q9RT73	coaE	NULL	NULL	NULL	NULL	NULL	0.285305	NULL	NULL	NULL	NULL	NULL	0.00812563	NULL	0.160214	NULL	0.0804618	0	7.81232	0	2.78396	6.98232	5.99434	no change	up	no change	up	up	up	0.527913	NULL	NULL	NULL
Q9RT74	DR_1891	3.02312	5.22388	3.82009	4.60523	2.96208	6.37071	4.14704	4.17908	7.66846	11.1609	3.09181	4.51466	6.10565	4.54644	4.85422	4.94366	0.03086	0.178439	0.013773	-1.30769	-0.821851	-0.942446	no change	no change	no change	down	no change	no change	0.000926725	0	0	NULL
Q9RT75	DR_1890	16.1229	15.211	5.05795	3.60699	8.12586	9.82742	3.67303	3.38899	18.4664	12.8258	6.56461	6.18416	13.8074	12.4916	6.40206	4.15978	-1.85446	-0.803477	-2.14957	-1.29544	-0.250796	-1.56694	down	no change	down	down	no change	down	0.0526398	NULL	NULL	NULL
Q9RT77	DR_1888	0.271228	0.443336	0.608572	0.291918	0.46243	0.410259	0.784905	0.635374	0.272022	0.148784	0.370921	0.282874	0.529974	0.150767	0.492292	0.369827	0.333647	0.288406	0.99104	0.635685	0.693952	1.03473	no change	no change	no change	no change	no change	up	0.444302	NULL	NULL	NULL
Q9RT78	DR_1887	NULL	NULL	NULL	NULL	0.271732	NULL	NULL	0.790039	NULL	NULL	NULL	NULL	0.261944	0.0702925	0.252834	NULL	0	7.74216	9.27968	0	8.02881	7.63842	no change	up	up	no change	up	up	0.348067	NULL	NULL	NULL
Q9RT79	DR_1886	2.47542	3.40121	0.990488	0.361737	1.96202	1.62092	14.2596	10.2677	1.59384	2.5793	3.15656	2.39871	4.27049	6.53333	3.05974	3.14806	-2.11965	-0.713846	2.06133	0.412727	1.37234	0.57295	down	no change	up	no change	up	no change	3.51259e-09	1	1	NULL
Q9RT80	DR_1885	0.0989544	NULL	NULL	NULL	0.302636	0.587721	0.175224	0.309947	0.19295	0.339485	0.0225357	NULL	0.425651	0.616089	0.0837934	0.139903	-6.29068	3.1603	2.28441	-4.52216	0.968317	-1.25107	down	up	up	down	no change	down	0.00676864	2	0	early_up
Q9RT81	DR_1884	0.835449	0.161966	0.0359075	0.288274	0.425239	0.439341	0.736674	0.985195	0.784332	0.328136	0.943971	0.710954	NULL	0.649616	1.04506	0.545351	-1.62139	-0.206194	0.787711	0.573001	-0.774693	0.515631	down	no change	no change	no change	no change	no change	0.0248226	0	0	NULL
Q9RT82	DR_1883	NULL	NULL	NULL	0.0384328	0.0524827	0.0456598	0.0263276	0.00291921	NULL	0.085248	NULL	NULL	NULL	0.118582	0.0083655	0.133106	4.94069	6.26955	4.52295	-6.07706	0.473142	0.720047	up	up	up	down	no change	no change	0.280864	NULL	NULL	NULL
Q9RT87	guaB	17.4606	19.4474	17.9226	16.1318	15.8217	17.4154	1.10476	1.30232	14.8746	17.6638	13.8736	11.3731	5.94429	6.16888	9.73928	12.7632	-0.116096	-0.151142	-3.93858	-0.366052	-1.42557	-0.532064	no change	no change	down	no change	down	no change	7.44647e-11	0	0	NULL
Q9RT88	DR_1877	NULL	NULL	NULL	NULL	NULL	NULL	NULL	0.114118	NULL	NULL	NULL	NULL	0.00903362	NULL	0.0122683	0.0159513	0	0	6.49515	0	2.92621	4.47137	no change	no change	up	no change	up	up	0.173124	NULL	NULL	NULL
Q9RT90	DR_1875	NULL	NULL	0.10656	NULL	0.0632245	NULL	0.184024	NULL	0.067278	NULL	0.0585745	0.15473	NULL	0.19005	NULL	NULL	6.39686	5.6496	7.18148	1.65113	1.48941	-5.73838	up	up	up	up	up	down	0.0943072	NULL	NULL	NULL
Q9RT91	guaA	2.89771	3.87949	5.08107	4.88068	8.52528	7.23654	11.3873	10.0838	3.6055	2.99189	6.32969	4.56706	6.57983	7.35214	8.98745	6.32851	0.555709	1.21767	1.66364	0.723931	1.07843	1.21507	no change	up	up	no change	up	up	0.00236299	2	2	sustain_up
Q9RT92	DR_1873	0.348794	NULL	0.358452	0.543872	0.34443	0.509951	0.316948	0.704152	0.517562	0.184545	0.511386	0.411117	0.222845	0.293199	0.517782	0.22431	1.36864	1.28988	1.54705	0.393864	-0.444196	0.0799086	up	up	up	no change	no change	no change	0.125748	NULL	NULL	NULL
Q9RT93	DR_1872	0.224522	0.130538	1.92467	1.57932	0.501951	0.15926	1.12325	1.55464	0.155078	0.10571	0.728699	0.823717	0.33156	0.736733	0.889981	1.2073	3.30286	0.897049	2.91496	2.57357	2.03436	3.00757	up	no change	up	up	up	up	2.67609e-05	2	3	sustain_up
Q9RT94	DR_1871	0.0380049	NULL	0.0619451	0.0404512	0.227673	0.248472	0.17052	0.147914	NULL	NULL	0.0411654	0.0899954	0.0971761	0.138999	0.0549608	0.148401	1.40596	3.6232	3.04279	6.68794	7.53645	7.32065	up	up	up	up	up	up	0.000527121	3	3	sustain_up
Q9RT95	DR_1870	NULL	NULL	NULL	NULL	NULL	NULL	NULL	NULL	NULL	NULL	NULL	NULL	0.285901	0.31296	0.0647853	0.148685	0	0	0	0	8.87882	7.39064	no change	no change	no change	no change	up	up	3.04489e-11	0	2	late_up
Q9RT96	DR_1869	NULL	NULL	NULL	NULL	0.0342577	0.0616325	0.177441	0.291303	NULL	NULL	0.0794933	NULL	0.135793	0.0612732	0.130124	0.0167449	0	6.23606	8.5254	5.977	7.27528	6.85113	no change	up	up	up	up	up	0.000227526	2	3	sustain_up
Q9RT97	DR_1868	0.0260949	0.145715	0.372042	0.237122	0.636315	0.326955	0.427155	0.143639	0.407819	0.339971	0.200252	0.0694163	0.301564	0.783208	0.113192	0.113127	1.82602	2.48713	1.73216	-1.47145	0.536688	-1.72428	up	up	up	down	no change	down	0.0121595	3	0	early_up
Q9RT98	DR_1867	0.297388	0.881261	0.593429	1.32624	0.403823	0.435926	NULL	0.574979	0.225948	0.410635	NULL	0.048964	0.518367	1.00891	NULL	0.0221789	0.703725	-0.489105	-1.03396	-3.68193	1.26254	-4.8023	no change	no change	down	down	up	down	0.00111415	0	1	NULL
Q9RT99	rsmH	0.0738963	0.552695	0.0775093	0.332874	1.31703	1.68437	0.272707	0.880877	0.232978	0.301382	0.466403	0.892784	0.960538	0.756953	1.52378	0.880393	-0.610551	2.26004	0.880526	1.34686	1.68442	2.16966	no change	up	no change	up	up	up	0.000368944	1	3	NULL
Q9RTA0	mraZ	5.34362	6.06069	2.62661	1.47148	2.78036	0.870456	0.510165	1.89759	11.62	5.4492	2.67195	2.20947	1.09822	2.00811	5.7903	2.52161	-1.47656	-1.64329	-2.24382	-1.80603	-2.45812	-1.03815	down	down	down	down	down	down	0.115517	NULL	NULL	NULL
Q9RTA1	DR_1864	NULL	0.788554	1.76257	0.883842	1.43021	0.0169208	1.62549	0.367381	NULL	NULL	2.0413	2.47667	0.0500361	0.367136	0.555191	0.507724	1.74559	0.874747	1.33641	11.7942	8.35724	9.70656	up	no change	up	up	up	up	0.0186765	2	3	sustain_up
Q9RTA2	DR_1863	0.413872	0.429348	1.11677	0.781377	0.603756	0.993023	0.878944	1.56454	0.203055	0.223162	0.36629	0.464618	0.377693	0.419397	0.518899	0.673057	1.17061	0.921183	1.53496	0.963101	0.903156	1.48367	up	no change	up	no change	no change	up	0.147902	NULL	NULL	NULL
Q9RTA4	DR_1861	0.422325	0.0992524	NULL	0.229201	0.267833	0.12824	0.662465	1.08133	0.248681	0.0754491	0.138888	0.185899	0.182595	0.0206486	0.349501	0.19042	-1.18227	-0.397112	1.74128	0.0029203	-0.673364	0.736177	down	no change	up	no change	no change	no change	0.00103783	1	0	NULL
Q9RTA6	DR_1859	0.134026	0.0636675	NULL	NULL	NULL	0.0206305	0.0698513	0.0182009	0.185287	0.314766	0.0728699	0.0642991	0.189056	0.0908048	0.0923701	0.0696639	-7.27987	-3.21661	-1.16684	-1.86613	-0.837372	-1.62579	down	down	down	down	no change	down	0.0299305	0	0	NULL
Q9RTA7	DR_1858	0.559844	NULL	0.365258	0.220353	0.434839	NULL	0.629107	0.784303	0.412763	0.561168	NULL	0.368917	0.28811	0.44777	0.175474	0.251341	0.0632792	-0.364075	1.33444	-1.39804	-0.40435	-1.19021	no change	no change	up	down	no change	down	0.00399206	1	0	NULL
Q9RTA8	DR_1857	4.85825	4.23721	4.47879	4.03754	10.7079	3.8966	NULL	NULL	59.4342	49.3547	9.48813	6.38639	69.5168	69.3095	14.2415	9.62472	-0.0949132	0.683195	-12.8037	-2.77675	0.351749	-2.18849	no change	no change	down	down	no change	down	3.68189e-13	0	0	NULL
Q9RTA9	gatA	3.02253	2.30782	4.36688	5.23173	6.05019	4.6956	3.33711	3.17118	2.66157	1.75395	2.89863	3.3325	2.50924	1.82677	4.3068	4.74116	0.848594	1.01147	0.288049	0.496906	-0.0262197	1.03501	no change	up	no change	no change	no change	up	2.41066e-07	1	1	NULL
Q9RTB3	DR_1852	3.38509	2.17692	3.5152	1.62841	5.58509	5.23353	3.80958	3.98461	4.41812	4.14806	6.95442	6.62908	5.85414	4.91488	5.75535	5.74256	-0.112825	0.959839	0.486792	0.665132	0.330164	0.424648	no change	no change	no change	no change	no change	no change	3.92806e-06	0	0	NULL
Q9RTB4	DR_1851	0.458198	0.319901	0.335043	0.834818	0.140641	0.150797	0.452903	NULL	0.556304	0.983109	0.377488	0.251344	0.415262	0.495085	0.091382	0.163579	0.588311	-1.41677	-0.778725	-1.29163	-0.757892	-2.59403	no change	down	no change	down	no change	down	0.00323143	0	0	NULL
Q9RTB6	msrA	8.47996	15.5638	5.56035	2.42068	13.0241	14.1826	2.8633	4.14158	11.0236	28.7691	8.57766	11.2395	11.0558	18.4431	6.56058	7.29497	-1.59101	0.178303	-1.77923	-1.00575	-0.431838	-1.52204	down	no change	down	down	no change	down	0.445885	NULL	NULL	NULL
Q9RTB7	glgB	5.04692	6.9843	7.31522	3.89356	4.96028	5.39436	4.86607	5.30124	4.15843	3.1778	4.0361	4.81023	2.40828	2.95692	2.56039	4.82183	-0.102154	-0.216505	-0.242845	0.270039	-0.451409	0.00901407	no change	no change	no change	no change	no change	no change	0.451031	NULL	NULL	NULL
Q9RTB8	DR_1847	0.338038	0.614028	0.182741	0.135731	0.0533388	NULL	1.19158	0.918574	0.203588	1.01661	1.10413	0.823227	NULL	0.477182	2.33559	1.50322	-1.5799	-4.1407	1.14821	0.659517	-1.35258	1.65355	down	down	up	no change	down	up	0.0288456	1	1	NULL
Q9RTC1	DR_1844	0.628752	0.776252	NULL	NULL	NULL	NULL	NULL	NULL	NULL	3.0236	NULL	5.92523	NULL	1.44513	NULL	NULL	-10.1091	-10.1091	-10.1091	0.970454	-1.06474	-11.2151	down	down	down	no change	down	down	0.208628	NULL	NULL	NULL
Q9RTC2	DR_1843	9.47133	9.75668	14.151	10.4608	3.2728	4.61298	15.7853	15.7473	7.99457	7.96558	7.6852	6.95021	6.30555	5.11669	7.88483	7.87765	0.356141	-1.28588	0.713638	-0.125012	-0.482628	-0.0179791	no change	down	no change	no change	no change	no change	3.21737e-08	0	0	NULL
Q9RTC3	DR_1842	NULL	1.03093	0.212678	0.134582	1.26848	0.553463	0.643403	0.853375	0.261766	0.196129	0.0770601	0.363548	1.31896	0.455083	0.965407	0.636607	-1.57074	0.820645	0.537032	-0.0555189	1.95396	1.8068	down	no change	no change	no change	up	up	0.701521	NULL	NULL	NULL
Q9RTC4	DR_1841	5.05275	5.31652	3.80778	2.37033	7.43958	6.05199	7.4878	5.27673	3.41098	2.81877	4.19218	3.38618	6.76372	3.95744	5.9663	6.50488	-0.747075	0.379744	0.299826	0.282711	0.783215	1.00135	no change	no change	no change	no change	no change	up	0.0251097	0	1	NULL
Q9RTC5	DR_1840	9.86069	0.293577	61.7756	44.7876	34.5468	29.3703	19.8935	19.45	12.9787	8.83905	13.6187	18.5175	10.8659	3.99077	14.1925	17.1787	3.39155	2.65412	1.95404	0.558695	-0.554399	0.523933	up	up	up	no change	no change	no change	2.34779e-07	3	0	early_up
Q9RTC6	DR_1839	0.434324	NULL	1.95971	0.560839	1.86159	2.4913	0.0336275	0.0914506	2.49942	NULL	0.952375	0.848537	1.67671	0.709239	1.8398	2.12669	2.53478	3.32302	-1.79805	-0.473234	-0.0673981	0.665904	up	up	down	no change	no change	no change	0.00133362	2	0	early_up
Q9RTC7	DR_1838	2.69508	2.47094	2.07839	1.86124	1.87209	1.02097	1.42781	2.30477	3.02924	2.33768	1.62296	2.51264	1.26118	1.54755	2.40614	1.47372	-0.390991	-0.836459	-0.468881	-0.375997	-0.934176	-0.46809	no change	no change	no change	no change	no change	no change	0.98129	NULL	NULL	NULL
Q9RTC8	DR_1837	NULL	0.0322871	0.0175897	NULL	0.0875235	0.164735	0.0503324	0.0889406	0.0450063	0.0147684	0.0624125	0.0639191	0.290882	0.0936581	0.0777001	0.0702028	-0.853127	2.93773	2.08074	1.07961	2.68553	1.30704	no change	up	up	up	up	up	0.461728	NULL	NULL	NULL
Q9RTC9	ffh	1.84991	1.89703	1.53734	1.81612	4.02841	4.35081	1.75362	1.6566	1.38425	1.71967	2.0694	2.9917	2.59691	3.94601	3.42364	3.51112	-0.160063	1.1611	-0.135847	0.705355	1.07584	1.15975	no change	up	no change	no change	up	up	4.67717e-06	1	2	NULL
Q9RTD0	mraY	5.77722	7.66329	0.0537322	0.0222466	8.04165	8.08365	3.68352	4.62939	3.87066	6.87898	5.51647	6.80374	5.68692	4.52046	4.7445	5.79547	-7.46677	0.262738	-0.693161	0.196739	-0.0746753	-0.0284174	down	no change	no change	no change	no change	no change	7.21717e-08	0	0	NULL
Q9RTD1	DR_1834	NULL	NULL	NULL	NULL	0.183041	0.229335	0.351443	0.435065	0.0590121	NULL	NULL	0.0629631	0.465496	0.165645	0.716165	0.747787	0	8.34056	9.27206	0.0925293	3.40341	4.61725	no change	up	up	no change	up	up	0.000752376	2	2	sustain_up
Q9RTD3	DR_1832	19.7161	15.5835	24.4506	12.6713	12.0221	10.9301	13.5717	13.3619	15.4937	17.731	15.1807	16.6766	13.6586	13.3152	12.0278	13.207	0.07262	-0.621022	-0.390241	-0.0606315	-0.300694	-0.396839	no change	no change	no change	no change	no change	no change	0.385484	NULL	NULL	NULL
Q9RTD4	DR_1831	1.60669	3.06491	3.07801	1.50033	4.03907	2.9476	2.10292	3.23781	2.85096	3.31536	2.16473	2.4372	2.71139	3.06957	1.13947	1.69043	-0.0290911	0.580689	0.193118	-0.422173	-0.093099	-1.12366	no change	no change	no change	no change	no change	down	0.0180308	0	0	NULL
Q9RTD5	DR_1830	0.616735	0.286604	NULL	NULL	5.46804	0.107564	NULL	2.03182	NULL	0.0216448	0.096142	0.11598	0.0456234	NULL	0.0506785	0.075997	-9.47187	2.62579	1.16988	3.25101	1.05394	2.50726	down	up	up	up	up	up	0.121155	NULL	NULL	NULL
Q9RTD6	DR_1829	2.29075	5.15007	3.46693	3.89901	2.36245	2.38235	4.54748	5.91156	1.41601	1.52377	2.80998	3.92517	2.03518	1.99824	2.8835	2.65764	-0.0145948	-0.649115	0.491216	1.19601	0.456299	0.914478	no change	no change	no change	up	no change	no change	0.00756873	0	1	NULL
Q9RTD8	proB	0.825906	0.78468	3.29794	4.0982	0.601594	1.15488	1.34637	2.30992	1.44088	1.01661	1.16521	0.767458	1.24734	1.29652	0.920351	0.788679	2.19919	0.125096	1.18279	-0.346593	0.0498328	-0.524006	up	no change	up	no change	no change	no change	3.34262e-08	2	0	early_up
Q9RTD9	proA	1.3134	3.41365	1.52323	1.82304	1.19075	0.926526	1.0523	1.47787	1.57816	2.36925	1.44263	1.90397	1.50444	1.44106	1.33472	1.09962	-0.498385	-1.15873	-0.901706	-0.23821	-0.422395	-0.697378	no change	down	no change	no change	no change	no change	0.452556	NULL	NULL	NULL
Q9RTE0	DR_1825	8.04053	5.09937	11.4197	9.63636	5.93707	10.1909	0.683025	2.24109	4.73509	5.59561	6.26726	9.00077	4.33314	2.63103	6.06559	5.6191	0.680285	0.295615	-2.16788	0.563575	-0.568915	0.177681	no change	no change	down	no change	no change	no change	3.53441e-05	0	0	NULL
Q9RTE1	DR_1824	0.0346243	0.399334	0.966051	1.17917	1.01283	1.0025	1.63725	2.30394	0.149384	0.314602	1.01901	1.1769	1.22131	1.11149	1.13859	0.966097	2.3055	2.21538	3.183	2.24266	2.32991	2.18145	up	up	up	up	up	up	3.72913e-05	3	3	sustain_up
Q9RTE2	DR_1823	3.0822	3.1619	0.35878	0.40951	1.12659	4.62657	0.13649	0.541105	2.69303	3.73389	1.84148	1.9848	4.04174	4.60278	2.36496	2.28164	-3.02277	-0.118139	-3.204	-0.748185	0.427659	-0.467949	down	no change	down	no change	no change	no change	0.11543	NULL	NULL	NULL
Q9RTE3	secD	14.7268	19.8994	15.6905	16.5234	9.89727	12.686	19.271	20.6221	16.464	13.6607	17.642	16.277	14.6385	11.907	14.3284	12.093	-0.104185	-0.616613	0.204272	0.171147	-0.182479	-0.189241	no change	no change	no change	no change	no change	no change	0.00019774	0	0	NULL
Q9RTE5	DR_1820	0.0205319	0.0233372	0.0212634	NULL	0.038861	0.0066193	NULL	NULL	0.0714889	NULL	NULL	NULL	0.0313306	NULL	0.0588838	NULL	-1.00231	0.052036	-5.10788	-5.82517	-1.17393	-0.277127	down	no change	down	down	down	no change	0.249106	NULL	NULL	NULL
Q9RTE6	uvsE	NULL	0.122919	NULL	NULL	NULL	NULL	0.0215879	NULL	0.137827	0.234025	0.0221635	NULL	0.0199173	0.19347	0.0312432	0.0822615	-6.60175	-6.60175	-2.47496	-4.02765	-0.801253	-1.71198	down	down	down	down	no change	down	0.115816	NULL	NULL	NULL
Q9RTE7	DR_1818	10.1346	9.91912	5.8091	6.92359	2.07483	2.37842	46.7584	44.0051	8.38149	10.4403	6.01153	6.43297	28.9169	26.0366	21.0094	26.1874	-0.655333	-2.17094	2.17824	-0.596897	1.54581	1.32628	no change	down	up	no change	up	up	5.94121e-15	1	2	NULL
Q9RTE8	DR_1817	0.105852	0.18343	0.0495987	0.0432816	0.750639	0.186748	0.322428	0.2722	0.290438	0.0282055	0.417577	0.121685	0.700239	0.145888	0.563979	0.530588	-1.63903	1.69617	1.03951	0.759046	1.40893	1.78035	down	up	up	no change	up	up	0.299936	NULL	NULL	NULL
Q9RTE9	DR_1816	0.137873	0.152036	0.0462929	0.0807287	0.505852	1.20717	0.0533876	0.0159625	NULL	0.192722	0.0333766	0.363456	0.0599905	0.499161	0.268905	0.255587	-1.19052	2.56287	-2.06363	1.03726	1.53196	1.43964	down	up	down	up	up	up	0.00243313	1	3	NULL
Q9RTF0	DR_1815	0.168916	0.190389	0.0930352	0.141325	0.115149	0.0442572	0.0236736	0.133909	0.243963	0.151212	NULL	0.159865	0.422113	0.145257	0.125364	0.208704	-0.616483	-1.17251	-1.18911	-1.29991	0.521797	-0.24235	no change	down	down	down	no change	no change	0.0320149	0	0	NULL
Q9RTF2	DR_1813	0.0741083	NULL	0.0781653	NULL	0.102956	0.101439	0.0769148	0.058145	0.0592583	NULL	0.0370765	NULL	0.13429	0.121643	0.0884325	0.0656073	0.0762556	1.45132	0.853561	-0.667376	2.09527	1.36281	no change	up	no change	no change	up	up	0.361331	NULL	NULL	NULL
Q9RTF3	gcvH	42.4334	32.2701	21.8511	21.1608	7.88279	1.8066	54.4137	66.3954	38.4795	42.8954	30.3266	36.046	14.1017	24.3762	16.2074	23.9899	-0.796439	-2.9467	0.693483	-0.293997	-1.08055	-1.01748	no change	down	no change	no change	down	down	4.94803e-09	0	0	NULL
Q9RTF5	gcvP	5.89226	10.5036	8.76777	13.0335	5.12645	6.03327	8.27063	13.5154	11.8461	11.7702	5.29115	7.60901	5.54607	4.59439	4.96444	6.52481	0.411077	-0.555035	0.410066	-0.872394	-1.21966	-1.0395	no change	no change	no change	no change	down	down	0.000522106	0	0	NULL
Q9RTF6	DR_1808	1.79424	2.10616	2.00836	2.52374	0.695456	1.08585	2.89232	2.07579	1.25265	1.40742	1.35751	1.1658	0.919769	1.65054	1.65154	1.09495	0.216555	-1.13069	0.34907	-0.0761477	-0.0495255	0.0461241	no change	down	no change	no change	no change	no change	0.000393267	0	0	NULL
Q9RTF9	DR_1805	0.360752	0.243689	0.0359425	0.269223	0.362141	0.234468	0.11312	0.430825	0.3656	0.320401	0.14159	0.362182	0.689263	0.42715	0.173797	0.125976	-0.986007	-0.0188155	-0.15214	-0.445442	0.702589	-1.19434	no change	no change	no change	no change	no change	down	0.0290202	0	0	NULL
Q9RTG0	DR_1804	0.0684181	0.0644471	0.633938	0.4135	1.97917	1.756	0.0958649	0.0801216	0.143093	0.139642	0.227682	0.326564	0.731159	0.317855	0.615056	0.594441	2.97883	4.81314	0.405501	0.971073	1.89151	2.09688	up	up	no change	no change	up	up	7.84736e-11	2	2	sustain_up
Q9RTG1	DR_1803	0.0875328	NULL	0.0800842	NULL	0.236506	0.320662	0.183552	NULL	0.380333	0.263243	0.375271	0.368279	1.52592	0.925192	0.327313	0.583565	-0.127338	2.65977	1.06284	0.208321	1.92925	0.501147	no change	up	up	no change	up	no change	0.000752613	2	1	NULL
Q9RTG2	DR_1802	NULL	0.128193	NULL	NULL	0.175611	NULL	0.289889	0.496691	NULL	NULL	NULL	NULL	NULL	NULL	0.0837375	0.087017	-6.66206	0.452145	2.61014	0	0	7.06852	down	no change	up	no change	no change	up	0.000717541	1	1	NULL
Q9RTG5	infB	1.18947	1.35418	1.24191	1.68465	3.95346	2.89058	2.43511	2.51135	0.68695	0.480649	2.61544	3.1305	2.65843	1.9188	2.10997	1.55675	0.202309	1.42795	0.959499	2.299	1.97093	1.65095	no change	up	no change	up	up	up	3.08862e-06	1	3	NULL
Q9RTG7	nusA	0.172132	0.337878	1.03225	2.81178	5.16743	6.19997	2.04008	1.84534	0.142581	0.0734421	5.32557	6.90915	0.350266	1.72554	5.29896	3.86354	2.91402	4.47823	2.92947	5.82365	3.26442	5.40648	up	up	up	up	up	up	2.79241e-09	3	3	sustain_up
Q9RTG8	rimP	0.0298954	0.00988174	2.01892	2.57527	1.9609	1.40673	0.981476	0.309746	3.50656	2.46288	3.03926	2.50761	2.95795	2.50424	0.381497	0.47748	6.85172	6.40365	5.02065	-0.10592	-0.128117	-2.7969	up	up	up	no change	no change	down	3.77875e-07	3	0	early_up
Q9RTG9	DR_1795	0.304686	0.212927	0.399787	0.0756054	0.307969	0.0940993	0.409439	0.477906	0.458062	0.422333	0.284952	0.0308699	0.236591	0.105798	0.281383	0.372734	-0.122756	-0.364435	0.77762	-1.47904	-1.36252	-0.428604	no change	no change	no change	down	down	no change	0.0459128	0	0	NULL
Q9RTH1	DR_1793	1.36165	1.40869	1.15258	1.56702	0.79291	0.843688	1.01264	0.402167	2.4234	2.30954	1.25081	1.26257	0.482444	0.776175	0.577598	0.393866	-0.0266635	-0.75936	-0.969451	-0.913105	-1.91089	-2.2845	no change	no change	no change	no change	down	down	4.14001e-06	0	0	NULL
Q9RTH2	DR_1792	2.21736	3.76606	0.0721682	4.08517	0.206975	1.76129	0.124572	0.369802	0.0524195	4.2519	0.120375	0.112922	0.0787817	1.42855	0.118059	0.918281	-0.52531	-1.60404	-3.59729	-4.20555	-1.51379	-2.05429	no change	down	down	down	down	down	0.385303	NULL	NULL	NULL
Q9RTH3	trpE	0.0185197	0.00943451	0.0093068	NULL	0.106624	0.0138658	0.0663656	0.0163474	0.0170132	NULL	0.0733301	0.061195	0.0215296	0.0013099	0.0666667	0.00411405	-1.49133	2.10777	1.56505	2.93019	0.371919	2.00375	down	up	up	up	no change	up	0.00498767	2	2	sustain_up
Q9RTH5	DR_1789	0.594763	0.502773	0.306369	0.497909	0.595167	1.23166	0.367549	0.207995	0.255349	0.227897	0.42286	0.131209	0.61478	0.836397	0.570194	0.416533	-0.448502	0.73507	-0.931269	0.197307	1.58639	1.02989	no change	no change	no change	no change	up	up	0.0354251	0	2	late_up
Q9RTH6	DR_1788	0.308744	0.2505	0.506484	0.456938	0.0603728	0.374238	NULL	NULL	NULL	0.0983609	0.158695	0.19552	NULL	0.0601263	0.2155	0.214058	0.784689	-0.363754	-8.78008	1.83917	-0.704207	2.1174	no change	no change	down	up	no change	up	6.72535e-06	0	2	late_up
Q9RTH7	DR_1787	NULL	0.0758241	NULL	0.0217321	0.123712	0.070647	0.0222662	0.0394784	0.0132998	NULL	0.0491295	0.034175	NULL	0.0352426	0.0492001	0.0440736	-1.77326	1.34595	-0.308394	2.57959	1.36432	2.74266	down	up	no change	up	up	up	0.000364822	1	3	NULL
Q9RTH9	leuB	2.73543	2.83178	3.47748	2.90026	13.2386	13.5276	15.464	16.6194	1.57369	1.67896	6.37291	5.16237	10.165	8.57976	13.1214	9.77561	0.19609	2.26538	2.5268	1.82637	2.5268	2.81547	no change	up	up	up	up	up	7.52735e-07	2	3	sustain_up
Q9RTI0	leuD2	0.496799	0.357745	0.274492	0.934339	2.63474	0.357461	0.833019	0.93833	1.72429	0.531772	3.29051	0.671059	3.58492	1	3.44646	1.16733	0.500387	1.80798	1.05162	0.812269	1.02309	1.03215	no change	up	up	no change	up	up	0.849224	NULL	NULL	NULL
Q9RTI3	DR_1781	0.210049	0.0990689	0.924284	0.102385	0.467819	0.258423	0.24549	1.18599	0.561831	0.0069219	0.605275	0.634717	0.410912	0.261049	1.4476	0.7034	1.73174	1.23229	2.21128	1.12446	0.240577	1.91913	up	up	up	up	no change	up	0.690663	NULL	NULL	NULL
Q9RTI4	DR_1780	2.2613	2.82689	5.3009	5.9353	7.52238	5.59081	1.61262	1.75263	3.46626	2.72207	4.28423	4.5537	3.77107	3.17947	3.87008	2.33148	1.14293	1.36579	-0.596437	0.51416	0.167576	0.00308198	up	up	no change	no change	no change	no change	3.29914e-06	2	0	early_up
Q9RTI5	DR_1779	1.28643	0.669687	0.135977	NULL	0.143495	NULL	1.23827	1.03892	0.567811	0.0544392	NULL	NULL	0.497273	NULL	0.177637	0.106911	-3.83982	-3.76253	0.219267	-8.93409	-0.321611	-1.12882	down	down	no change	down	no change	down	8.63996e-05	0	0	NULL
Q9RTI6	leuC2	2.87185	3.25875	2.50847	1.50674	5.82844	6.50033	2.76046	3.43821	1.22461	2.42067	4.59919	4.41857	5.42978	5.08752	5.29872	4.84175	-0.610554	1.00793	0.0159298	1.30674	1.52866	1.47602	no change	up	no change	up	up	up	4.10793e-08	1	3	NULL
Q9RTI8	DR_1776	0.642594	0.764154	0.620052	1.25381	1.05297	1.06969	2.76492	3.64439	1.78755	0.228326	1.97783	1.87584	2.42045	2.64838	2.6723	1.91377	0.41365	0.593508	2.18781	0.934827	1.33025	1.18585	no change	no change	up	no change	up	up	0.000221612	1	2	NULL
Q9RTI9	DR_1775	1.68939	1.82757	2.43691	1.84652	3.01457	3.51076	2.22313	3.39919	1.37194	1.36371	1.8063	1.72355	3.02984	3.05595	2.93108	2.39383	0.284438	0.89172	0.676834	0.367721	1.15356	0.960873	no change	no change	no change	no change	up	no change	0.827769	NULL	NULL	NULL
Q9RTJ1	DR_1773	0.0103743	0.000816897	0.107298	0.0489113	1.22567	0.988287	1.88809	0.48548	0.221326	0.379317	0.436827	0.556194	0.343866	0.107673	0.625956	0.575203	3.80304	7.62811	7.72855	0.725319	-0.411658	0.99985	up	up	up	no change	no change	no change	0.000837952	3	0	early_up
Q9RTJ3	DR_1769	4.54746	4.85822	1.79816	0.750975	3.02158	3.18359	1.81626	2.76264	8.88599	11.4681	5.50286	6.31837	5.30267	7.44845	5.58153	5.09064	-1.88352	-0.60006	-1.03853	-0.783935	-0.674692	-0.931462	down	no change	down	no change	no change	no change	0.0187685	0	0	NULL
Q9RTJ4	DR_1768	1.86811	0.370251	3.19036	3.42996	7.76406	5.00184	21.0976	30.628	1.36943	0.757133	20.9909	8.63122	8.59393	5.44797	11.4476	15.6021	1.56446	2.51178	4.53036	3.80008	2.72314	3.66902	up	up	up	up	up	up	4.14655e-05	3	3	sustain_up
Q9RTJ5	trpD	0.379548	0.296112	0.805707	0.59972	0.902518	0.624403	0.987702	0.93735	0.416572	0.193579	0.78817	0.449499	0.628955	0.544517	0.744544	0.800503	1.05664	1.17626	1.51053	1.02039	0.943545	1.34041	up	up	up	up	no change	up	0.464413	NULL	NULL	NULL
Q9RTJ6	DR_1766	0.132248	NULL	NULL	NULL	0.020407	0.0130381	NULL	0.0794255	NULL	NULL	NULL	NULL	NULL	NULL	NULL	NULL	-6.70676	-1.9903	-0.730982	0	0	0	down	down	no change	no change	no change	no change	0.211607	NULL	NULL	NULL
Q9RTJ7	DR_1765	0.721114	1.32651	0.907391	1.33324	0.443905	1.47753	1.04961	0.116349	0.622481	0.743849	0.870973	1.04072	0.814478	1.15321	1.34962	1.49179	0.129948	-0.0917713	-0.812432	0.484547	0.526197	1.0563	no change	no change	no change	no change	no change	up	0.0134533	0	1	NULL
Q9RTJ8	DR_1764	0.213801	0.299565	0.318347	0.0242746	0.128871	0.108702	0.0352942	0.0654003	0.550324	0.216477	0.250995	0.194613	0.220197	0.168974	0.238441	0.0625763	-0.583374	-1.11161	-2.35	-0.783078	-0.978447	-1.34901	no change	down	down	no change	no change	down	0.890988	NULL	NULL	NULL
Q9RTK1	mnmA	0.0318299	NULL	0.0275634	0.0247979	0.248879	0.0589961	0.0393682	0.0383534	0.00383845	0.00816627	0.129583	0.0950023	0.253065	0.0113991	0.114828	0.161224	0.689575	3.24534	1.25939	4.22559	4.4614	4.52327	no change	up	up	up	up	up	0.164192	NULL	NULL	NULL
Q9RTK2	lysA	2.58286	1.90369	1.9256	1.90813	1.43172	1.62415	2.69117	1.2734	3.18838	2.60422	3.26318	3.34402	3.32575	1.53864	3.27774	1.43143	-0.226859	-0.554025	-0.178444	0.189826	-0.251953	-0.29874	no change	no change	no change	no change	no change	no change	0.444019	NULL	NULL	NULL
Q9RTK3	DR_1757	0.082249	NULL	0.0595124	0.155797	0.264687	0.262617	0.0551209	0.168655	0.11211	0.0864479	0.057678	0.116023	0.20741	0.396112	0.169432	0.262861	1.37723	2.66945	1.43287	-0.192956	1.60385	1.12245	up	up	up	no change	up	up	0.213563	NULL	NULL	NULL
Q9RTK4	DR_1756	NULL	NULL	NULL	NULL	0.013044	0.0183021	0.0493524	0.0819599	NULL	NULL	NULL	NULL	NULL	NULL	NULL	0.0587484	0	4.62296	6.6896	0	0	5.54476	no change	up	up	no change	no change	up	0.0560806	NULL	NULL	NULL
Q9RTK5	DR_1755	1.93067	3.43329	1.67735	1.88598	0.872821	0.69237	5.18658	6.2106	0.644339	2.01214	0.69212	5.58002	0.466916	0.410166	0.955793	5.26407	-0.590075	-1.77696	1.08731	1.23944	-1.59873	1.22737	no change	down	up	up	down	up	0.0737639	NULL	NULL	NULL
Q9RTK6	DR_1754	6.99673	9.86814	17.8439	13.4928	12.1371	6.69237	0.231905	8.98966	4.73946	3.01368	0.125537	5.50201	0.0293834	2.52246	4.40512	4.03959	0.893831	0.158974	-0.870939	-0.462275	-1.60324	0.123266	no change	no change	no change	no change	down	no change	0.00192321	0	0	NULL
Q9RTK8	DR_1752	0.26476	0.27664	0.427165	0.106088	0.15065	0.365624	0.491257	0.463552	0.50706	0.115138	0.709809	0.355814	0.148168	0.231446	0.154616	0.411863	-0.0218756	-0.0685585	0.818518	0.776253	-0.712841	-0.135351	no change	no change	no change	no change	no change	no change	0.0355365	0	0	NULL
Q9RTL0	DR_1750	NULL	NULL	NULL	NULL	NULL	0.369134	NULL	NULL	NULL	NULL	0.263821	0.611025	4.30993	3.45768	1.80023	1.11422	0	8.18323	0	9.42563	12.576	11.1618	no change	up	no change	up	up	up	3.11496e-10	1	3	NULL
Q9RTL2	DR_1748	12.1727	20.49	20.5292	29.5414	38.7543	27.1429	21.1022	11.4863	3.90915	4.3801	31.0722	36.4088	23.312	19.8438	28.9272	19.3471	0.616317	1.01257	-0.0032819	3.02517	2.38024	2.54194	no change	up	no change	up	up	up	0.000172717	1	3	NULL
Q9RTL3	DR_1747	0.331871	0.0376076	0.0304259	NULL	0.377074	0.232349	0.295573	0.0517623	0.030799	NULL	0.208757	0.10748	0.0402619	0.00602981	0.70024	0.183362	-3.57227	0.721955	-0.0891604	3.33056	0.55838	4.81295	down	no change	no change	up	no change	up	0.00293855	0	2	late_up
Q9RTL4	DR_1746	0.145849	0.172256	0.631861	0.425484	0.0443344	0.411214	0.0784674	0.0522281	0.814381	0.680627	0.421859	0.760043	0.483413	0.0611973	0.663681	0.0965281	1.73287	0.518103	-1.28329	-0.339043	-1.45686	-0.975686	up	no change	down	no change	down	no change	0.029484	1	0	NULL
Q9RTL5	DR_1745	1.7119	1.2493	NULL	NULL	1.64243	1.42443	1.06429	0.997843	1.10507	0.0353405	1.4909	1.12039	1.60137	1.69405	1.17816	1.19195	-11.1847	0.050584	-0.522041	1.19521	1.53091	1.0554	down	no change	no change	up	up	up	2.61133e-06	0	3	late_up
Q9RTL6	DR_1744	0.117951	0.0612526	NULL	0.132462	0.0307351	0.258489	2.11833	2.19109	0.0675795	0.150355	0.230228	0.176161	4.0174	2.78581	0.320588	1.666	-0.42911	0.690588	4.58782	0.898962	4.96425	3.18833	no change	no change	up	no change	up	up	2.31685e-08	1	2	NULL
Q9RTL7	DR_1743	0.0472223	0.751444	0.0187426	0.0150254	0.719763	0.858265	0.0801468	0.118937	1.38616	0.169882	1.88306	0.118211	2.31655	0.423873	2.37955	2.11415	-4.56386	0.982458	-2.00422	0.363033	0.816517	1.53002	down	no change	down	no change	no change	up	0.0426609	0	1	NULL
Q9RTL8	pgi	15.1115	10.3779	18.8886	16.6625	11.797	12.0434	13.4472	11.5564	12.627	13.2064	8.47721	15.4288	7.15046	7.22626	6.53752	11.9117	0.479997	-0.0964904	-0.0277564	-0.111865	-0.845506	-0.485682	no change	no change	no change	no change	no change	no change	0.06104	NULL	NULL	NULL
Q9RTM0	DR_1740	0.0135941	NULL	0.106024	0.00310136	0.224299	0.492583	0.123938	0.0766067	NULL	0.0267036	0.457518	0.581615	0.0500744	0.0401375	0.0940281	0.103887	2.93897	5.65471	3.8169	5.24824	1.72232	2.85581	up	up	up	up	up	up	2.85986e-08	3	3	sustain_up
Q9RTM4	DR_1736	23.7234	29.6676	17.4503	18.0309	13.2251	16.9942	3.31056	3.25536	18.8644	21.6798	19.7819	22.0628	14.2092	14.7055	8.32933	8.8686	-0.589544	-0.821128	-3.02353	0.0455495	-0.487694	-1.23726	no change	no change	down	no change	no change	down	1.14963e-05	0	0	NULL
Q9RTM5	DR_1735	NULL	NULL	NULL	NULL	NULL	NULL	NULL	0.228874	0.0198985	NULL	NULL	NULL	NULL	NULL	NULL	NULL	0	0	7.49516	-4.01273	-4.01273	-4.01273	no change	no change	up	down	down	down	0.0533034	NULL	NULL	NULL
Q9RTM9	DR_1731	0.0920095	0.0243064	0.100678	0.130526	0.573694	0.588823	0.287122	0.543213	0.0784584	0.201236	0.183263	0.177098	0.229987	0.382629	0.43522	0.638273	0.991119	3.32113	2.83564	0.365596	1.13113	1.94039	no change	up	up	no change	up	up	0.000413935	2	2	sustain_up
Q9RTN0	DR_1730	NULL	NULL	NULL	NULL	0.0570859	NULL	0.0698436	0.00703711	NULL	0.0253394	NULL	0.0770706	0.0212402	0.0549233	0.0596703	0.0491459	0	5.50379	5.91729	1.58089	1.55195	2.06667	no change	up	up	up	up	up	0.647523	NULL	NULL	NULL
Q9RTN2	DR_1728	0.224557	0.0873105	0.187776	0.35021	0.144129	1.54149	0.341009	0.791902	0.238656	0.363354	0.324693	0.403009	0.660777	0.856777	0.519967	0.558056	0.786633	2.43427	1.86103	0.273559	1.33389	0.840528	no change	up	up	no change	up	no change	0.86818	NULL	NULL	NULL
Q9RTN3	DR_1724	0.741967	0.96289	0.810901	1.08222	0.783395	1.19975	0.326821	0.296519	1.20708	1.68489	0.8456	1.17451	0.856892	2.32557	1.14476	0.938596	0.151118	0.21814	-1.45156	-0.51762	0.138091	-0.473143	no change	no change	down	no change	no change	no change	0.257586	NULL	NULL	NULL
Q9RTN5	DR_1722	0.0779961	0.0874125	0.0718347	0.00377932	0.249126	0.0662334	0.205914	0.00726359	0.279483	NULL	0.263537	NULL	0.609641	0.636909	0.106139	NULL	-1.12931	0.930962	0.366025	-0.0845589	2.15383	-1.39146	down	no change	no change	no change	up	down	0.000506482	0	1	NULL
Q9RTN7	acn	27.114	38.3124	24.4462	26.5734	28.4419	30.0639	32.6256	35.5919	44.3907	48.0127	45.5117	39.6047	45.4183	30.2681	23.377	32.3085	-0.358819	-0.161292	0.0602708	-0.11851	-0.287912	-0.730644	no change	no change	no change	no change	no change	no change	0.000556892	0	0	NULL
Q9RTN8	DR_1719	0.523235	0.352926	0.210464	2.84026	2.76268	1.85929	0.914838	1.07853	0.371353	0.419555	1.18286	0.925755	1.78405	1.80814	2.52616	1.47565	1.79989	2.39924	1.18594	1.41471	2.18328	2.33907	up	up	up	up	up	up	0.0823914	NULL	NULL	NULL
Q9RTP0	DR_1717	0.755986	0.879834	0.312454	0.195355	3.83193	2.42469	0.456362	1.83083	3.99533	4.76078	0.959219	1.36056	5.34774	3.85814	1.92057	1.21919	-1.68766	1.93537	0.48356	-1.9163	0.0722665	-1.47963	down	up	no change	down	no change	down	0.000188389	1	0	NULL
Q9RTP3	DR_1714	1.8518	0.0906341	1.12705	1.92241	3.01541	0.93868	3.57938	3.45291	2.7172	0.785773	5.61732	4.02218	1.39286	0.724944	2.49144	0.923441	0.650694	1.02548	1.85613	1.46038	-0.726011	-0.0367434	no change	up	up	up	no change	no change	9.58634e-05	2	1	NULL
Q9RTP4	aat	NULL	0.0788215	NULL	NULL	NULL	NULL	NULL	0.0625276	NULL	NULL	0.080806	NULL	0.138626	0.0653732	0.0553565	NULL	-5.96486	-5.96486	-0.331089	6.00045	7.32516	5.45991	down	down	no change	up	up	up	0.00299228	0	3	late_up
Q9RTP5	DR_1712	14.7445	15.7942	10.7883	13.2396	9.86864	9.80172	11.6833	18.1754	12.3421	15.2527	11.4804	10.8344	14.2662	13.5894	11.9287	9.6662	-0.345926	-0.634615	-0.0324892	-0.306396	0.0135717	-0.353701	no change	no change	no change	no change	no change	no change	0.00107797	0	0	NULL
Q9RTP6	DR_1711	1.15695	0.894515	1.19839	0.327729	0.37553	0.522729	0.583221	0.561008	0.726144	0.289348	0.416336	0.713406	0.668349	0.476662	0.377443	0.70131	-0.426786	-1.19145	-0.84228	0.153815	0.173184	0.087185	no change	down	no change	no change	no change	no change	0.0703821	NULL	NULL	NULL
Q9RTP7	DR_1710	0.354095	0.137633	0.428789	0.614568	0.0799478	0.116336	0.609354	0.567234	0.22838	0.258408	0.118626	0.121894	0.124026	0.317108	0.114112	0.20098	1.0853	-1.32492	1.25867	-1.01714	-0.142078	-0.627524	up	down	up	down	no change	no change	1.08528e-06	2	0	early_up
Q9RTP8	mntH	1.19648	1.42411	3.08889	4.08347	1.2124	1.13722	6.67192	6.64935	0.868399	1.73624	1.63125	0.59082	1.26025	0.889146	3.03255	3.54738	1.45256	-0.15747	2.34577	-0.229182	-0.27715	1.33699	up	no change	up	no change	no change	up	8.15428e-08	2	1	NULL
Q9RTP9	DR_1708	14.8193	19.6554	4.09901	3.77129	3.20993	2.85011	NULL	NULL	27.2378	34.3392	0.563773	1.90936	8.28112	8.81793	0.879324	1.10586	-2.13105	-2.50814	-14.726	-4.63798	-1.84847	-4.95505	down	down	down	down	down	down	6.91478e-07	0	0	NULL
Q9RTQ0	DR_1706	2.80894	2.66519	2.74366	2.118	0.370113	1.76192	2.43576	2.5916	5.62384	5.85852	3.69292	2.82739	2.63274	0.260854	3.82735	3.78156	-0.171183	-1.3604	-0.12283	-0.816405	-1.98848	-0.593657	no change	down	no change	no change	down	no change	0.00287717	0	0	NULL
Q9RTQ1	DR_1705	6.86596	12.2184	6.61437	13.5399	6.50883	8.30102	8.80174	8.38718	8.43475	10.6381	6.04554	9.21587	6.3673	8.07265	6.63996	7.81004	0.0786933	-0.365838	-0.150916	-0.321635	-0.401458	-0.400454	no change	no change	no change	no change	no change	no change	0.608474	NULL	NULL	NULL
Q9RTQ2	argJ	1.09793	0.499966	0.381866	1.26838	1.91796	1.44231	2.65055	3.56478	0.992412	0.71878	0.975267	0.761881	1.85655	2.00959	2.26485	2.80272	0.0465121	1.0724	1.95966	0.021719	1.17589	1.56629	no change	up	up	no change	up	up	0.111791	NULL	NULL	NULL
Q9RTQ3	DR_1703	0.10627	0.200585	0.218002	0.0913949	0.436607	0.387677	0.762653	0.914408	NULL	0.103996	0.644095	0.538814	1.08952	0.680427	0.892943	0.140082	0.0119039	1.42559	2.45031	3.49894	4.08031	3.30348	no change	up	up	up	up	up	0.000850727	2	3	sustain_up
Q9RTQ4	DR_1702	0.347286	NULL	0.0763503	0.284682	NULL	0.264699	NULL	0.249694	NULL	0.0713888	0.400568	0.101615	0.254552	NULL	0.258758	0.273165	0.0533625	-0.390951	-0.474935	2.80165	1.825	2.88465	no change	no change	no change	up	up	up	0.251429	NULL	NULL	NULL
Q9RTQ5	DR_1701	0.822078	0.537042	1.08796	1.31336	0.855166	0.800764	0.463395	0.409976	1.38506	0.488626	0.345768	0.554852	0.278441	0.1581	2.54169	0.649737	0.821157	0.284969	-0.638006	-1.05689	-2.10169	0.768327	no change	no change	no change	down	down	no change	0.00157519	0	0	NULL
Q9RTQ6	DR_1700	0.112797	0.0387977	0.101006	0.0248782	0.461139	0.590438	0.0776719	0.217447	0.00513844	0.060205	0.178021	0.215817	0.294285	0.220101	0.496589	0.311686	-0.268124	2.79426	0.961076	2.59149	2.97674	3.62873	no change	up	no change	up	up	up	1.58402e-06	1	3	NULL
Q9RTQ7	DR_1699	3.34132	4.6185	2.69675	3.11962	9.45491	21.7922	1.79194	1.39203	5.18265	9.299	3.61828	5.44734	14.895	20.8328	1.84165	2.65196	-0.452618	1.97292	-1.32191	-0.675749	1.30282	-1.68828	no change	up	down	no change	up	down	0.844164	NULL	NULL	NULL
Q9RTQ8	DR_1698	0.119371	0.99667	1.24043	0.541789	0.304572	0.323012	0.389762	0.38496	1.24858	0.1989	0.0117709	0.430709	0.476494	0.0763307	0.318525	0.290139	0.675287	-0.830509	-0.526638	-1.70986	-1.38865	-1.24982	no change	no change	no change	down	down	down	0.116683	NULL	NULL	NULL
Q9RTQ9	DR_1697	NULL	NULL	1.0094	NULL	0.065863	NULL	NULL	0.537379	NULL	NULL	NULL	NULL	NULL	0.836957	NULL	NULL	9.63294	5.70801	8.72425	0	9.36285	0	up	up	up	no change	up	no change	0.040534	3	1	NULL
Q9RTR0	mutL	0.0099031	0.0086726	0.0269325	0.0438373	0.0615516	0.0429023	0.0765343	0.0314653	0.0995377	NULL	0.0114207	0.00735836	0.0230551	0.0588155	0.0159612	0.0138351	1.92972	2.49138	2.53954	-2.41531	-0.291087	-1.7493	up	up	up	down	no change	down	0.0205386	3	0	early_up
Q9RTR1	DR_1695	5.0521	0.552253	1.69172	1.9986	2.01718	0.668686	1.1161	0.545909	5.10728	0.401057	5.88266	1.27556	5.74867	0.480898	1.54179	0.781853	-0.602801	-1.06116	-1.75362	0.377984	0.177515	-1.24523	no change	down	down	no change	no change	down	0.718446	NULL	NULL	NULL
Q9RTR2	DR_1694	2.45168	2.73513	1.58512	1.3498	3.60008	3.42223	1.36225	0.92431	3.13808	3.32079	3.16264	2.90467	3.10241	2.62804	3.30226	3.43339	-0.821529	0.437096	-1.18167	-0.0902231	-0.172635	0.0605346	no change	no change	down	no change	no change	no change	9.00569e-11	0	0	NULL
Q9RTR3	DR_1693	11.3192	10.2195	8.10464	8.25616	5.48741	4.81787	0.562507	5.41595	0.823627	15.0548	10.8088	8.47127	0.437235	9.10206	5.22783	5.8768	-0.396688	-1.06355	-1.84909	0.280043	-0.735115	-0.515908	no change	down	down	no change	no change	no change	0.479383	NULL	NULL	NULL
Q9RTR4	DR_1692	12.3942	11.2608	13.4217	11.9735	11.5848	11.3737	5.46789	10.1402	5.29722	4.46716	8.43158	9.64118	6.09776	7.46763	6.71522	8.77062	0.102413	-0.0431217	-0.59985	0.888216	0.47433	0.665348	no change	no change	no change	no change	no change	no change	0.000251641	0	0	NULL
Q9RTR5	DR_1691	NULL	NULL	NULL	NULL	0.111808	0.102016	NULL	NULL	NULL	NULL	NULL	NULL	0.122052	0.117867	NULL	NULL	0	7.39303	0	0	7.55915	0	no change	up	no change	no change	up	no change	2.21091e-05	1	1	NULL
Q9RTR6	miaA	1.12614	0.0630307	NULL	NULL	NULL	0.0661159	0.121644	0.106098	0.255605	0.131	0.0166603	0.0796568	0.0315469	0.0814178	0.271867	0.373649	-9.86849	-4.15501	-2.38449	-2.005	-1.77499	0.739589	down	down	down	down	down	no change	0.0740088	NULL	NULL	NULL
Q9RTR7	glgC	3.23895	3.5769	1.5304	4.41244	3.89985	3.75487	4.43142	7.30624	2.73645	3.61704	2.89639	2.40748	2.90138	1.96264	4.24271	2.60604	-0.197743	0.167455	0.784179	-0.260505	-0.385401	0.108292	no change	no change	no change	no change	no change	no change	0.101081	NULL	NULL	NULL
Q9RTR8	DR_1688	2.56284	1.19194	2.24125	1.6449	0.57361	0.125417	0.596979	0.346522	2.05487	1.62575	0.828871	0.664808	0.23907	0.423993	0.411332	0.22867	0.0496168	-2.42531	-1.99263	-1.30108	-2.47273	-2.5238	no change	down	down	down	down	down	0.00832628	0	0	NULL
Q9RTR9	gluQ	0.119147	0.0228961	0.0115171	NULL	NULL	NULL	0.0383559	NULL	0.171419	0.228283	0.0956938	0.176093	0.234157	NULL	0.0254242	NULL	-3.54693	-6.80293	-1.86508	-0.556446	-0.767534	-3.939	down	down	down	no change	no change	down	0.0753053	NULL	NULL	NULL
Q9RTS0	DR_1686	1.14405	2.59247	0.30949	NULL	NULL	2.184	NULL	NULL	NULL	2.12841	0.638332	0.413317	0.51839	1.42883	0.0951788	0.228033	-3.59077	-0.774304	-11.5202	-1.01756	-0.128796	-2.71966	down	no change	down	down	no change	down	0.412347	NULL	NULL	NULL
Q9RTS1	DR_1685	NULL	NULL	NULL	NULL	0.0533809	0.0440626	0.0864302	0.0169768	0.0360871	NULL	NULL	0.0721434	0.0576107	0.0356462	0.139215	0.156834	0	6.25924	6.34493	0.98684	1.34452	3.01108	no change	up	up	no change	up	up	0.00276093	2	2	sustain_up
Q9RTS2	DR_1684	0.0873089	NULL	0.0507331	NULL	NULL	0.207527	0.0968256	0.16492	0.195166	NULL	0.069228	NULL	0.229041	0.158132	0.0778288	NULL	-0.775699	1.24304	1.57349	-1.48677	0.983582	-1.31928	no change	up	up	down	no change	down	0.0830122	NULL	NULL	NULL
Q9RTS4	DR_1682	0.108397	0.0754707	0.025831	NULL	0.0605019	0.045994	0.0499058	NULL	0.0669162	NULL	0.0428983	0.0217025	0.0769629	0.0803708	NULL	NULL	-2.7964	-0.78787	-1.86311	-0.0644535	1.21975	-5.73068	down	no change	down	no change	up	down	0.00167874	0	1	NULL
Q9RTS5	DR_1681	1.15501	1.21138	0.249989	0.26859	0.786286	0.607513	1.97025	2.73621	3.60791	3.72667	1.63929	1.82467	2.98138	2.02693	1.1684	1.03485	-2.19005	-0.763664	0.991959	-1.08229	-0.550388	-1.73508	down	no change	no change	down	no change	down	6.9834e-10	0	0	NULL
Q9RTS6	trmB	4.80358	6.99246	2.17554	1.48384	2.89668	3.18624	2.12978	2.24281	4.55037	6.08106	3.25269	3.71221	3.63157	4.1636	2.11327	2.09047	-1.68863	-0.955467	-1.43174	-0.610162	-0.447684	-1.33859	down	no change	down	no change	no change	down	0.0071191	0	0	NULL
Q9RTT0	DR_1676	0.0551274	0.0278638	0.0476257	NULL	NULL	0.051399	0.198159	0.230291	NULL	NULL	0.0267431	NULL	0.0453349	0.0157165	0.0693152	0.0281745	-0.782076	-0.673474	2.3681	4.42775	5.5847	6.25992	no change	no change	up	up	up	up	9.44073e-07	1	3	NULL
Q9RTT1	DR_1675	0.190534	0.15525	NULL	0.11269	0.105204	0.256775	0.471696	0.229423	0.152972	0.191101	0.190383	0.14656	0.348756	0.150999	0.0452019	0.211291	-1.60939	0.0660312	1.01979	-0.0302089	0.538506	-0.423796	down	no change	up	no change	no change	no change	0.00469561	1	0	NULL
Q9RTT2	DR_1674	1.05069	0.0642948	1.26881	2.37321	5.26511	6.58478	3.56773	4.05716	0.602834	NULL	2.66687	0.533648	6.95484	6.09415	4.2648	0.076598	1.70771	3.40978	2.7737	2.40695	4.43451	2.84681	up	up	up	up	up	up	0.248691	NULL	NULL	NULL
Q9RTT3	DR_1673	0.0756222	0.241358	0.529636	0.540147	0.264182	0.0346053	0.106737	0.0391181	0.127868	0.297947	0.123448	0.0915275	0.437348	0.349716	0.315418	0.317245	1.75485	-0.0852755	-1.11986	-0.986052	0.886256	0.571212	up	no change	down	no change	no change	no change	1.30118e-07	1	0	NULL
Q9RTT4	DR_1672	NULL	0.0189241	0.0240302	NULL	0.0647515	NULL	0.0200803	0.0289426	0.0242134	NULL	0.0204582	0.025396	0.0533918	0.0457081	0.0594033	0.0397034	0.334621	1.7411	1.32554	0.883844	1.99567	1.99577	no change	up	up	no change	up	up	0.554071	NULL	NULL	NULL
Q9RTT5	DR_1671	NULL	NULL	0.0374311	NULL	0.137199	0.14172	0.0430153	NULL	0.322441	0.270907	0.0542962	NULL	1.46049	1.18842	0.102593	0.0763334	4.90322	7.77645	5.1007	-3.43315	2.15845	-1.72951	up	up	up	down	up	down	2.30589e-12	3	1	NULL
Q9RTT6	cysS	10.0686	8.48161	10.4461	12.0375	5.93988	7.07204	5.24115	6.52042	6.29265	7.62347	6.55141	6.28283	5.57424	5.04636	5.5859	5.26864	0.277438	-0.511604	-0.657357	-0.11676	-0.389893	-0.358458	no change	no change	no change	no change	no change	no change	2.91327e-05	0	0	NULL
Q9RTT7	DR_1669	1.22799	1.56576	4.67314	3.08738	0.643781	0.730447	0.618962	1.04064	1.62404	2.74228	1.25757	1.10323	1.07714	0.476942	1.20957	0.610641	1.47395	-1.02358	-0.751367	-0.887137	-1.49035	-1.26231	up	down	no change	no change	down	down	3.814e-06	1	0	NULL
Q9RTT8	DR_1668	NULL	NULL	0.149945	NULL	0.136161	0.102585	0.597325	NULL	0.0992915	0.160776	0.28801	NULL	0.22011	0.0133152	0.109873	0.058154	6.88714	7.55208	8.87665	0.150416	-0.155927	-0.630191	up	up	up	no change	no change	no change	0.137956	NULL	NULL	NULL
Q9RTU0	DR_1666	1.5598	0.166587	1.8636	1.29533	1.08951	1.11247	2.01526	3.7145	0.398392	0.789415	2.14712	1.90544	0.836158	0.856018	1.4796	2.4621	0.871676	0.351043	1.73071	1.77053	0.510579	1.73051	no change	no change	up	up	no change	up	0.118851	NULL	NULL	NULL
Q9RTU1	DR_1665	1.99381	1.23693	2.32583	1.82981	2.15679	1.96464	1.2933	1.19295	0.964022	0.521173	0.036617	1.06996	0.227351	0.998082	1.63341	1.39367	0.363202	0.351277	-0.377896	-0.424554	-0.277361	1.02727	no change	no change	no change	no change	no change	up	0.000244042	0	1	NULL
Q9RTU2	mqnB	3.98704	2.44002	3.50612	1.72757	0.0154313	0.896637	0.718112	NULL	4.20612	2.41053	1.24661	1.02638	1.70761	1.15705	0.698687	0.255665	-0.29633	-2.81695	-3.1606	-1.54151	-1.20774	-2.79351	no change	down	down	down	down	down	0.0149778	0	0	NULL
Q9RTU3	DR_1663	0.265862	0.277319	0.38583	0.279816	2.19477	2.93519	1.55505	3.82519	0.153033	0.165625	1.41197	2.06735	0.346232	0.758951	0.905882	1.37028	0.293322	3.23944	3.30817	3.44873	1.79421	2.83653	no change	up	up	up	up	up	2.58561e-05	2	3	sustain_up
Q9RTU4	tdh	2.80918	2.08877	5.07976	3.80905	3.65369	4.54689	3.55186	1.25374	2.51103	1.71753	2.14744	1.43404	2.70982	3.19146	4.06622	3.3857	0.859815	0.74355	-0.0274593	-0.239611	0.48086	0.817447	no change	no change	no change	no change	no change	no change	0.000139381	0	0	NULL
Q9RTU7	DR_1659	17.9413	24.5416	14.6102	20.8428	14.713	16.6854	15.9467	15.8674	30.3904	33.7414	17.2446	14.664	14.2863	16.6944	13.321	12.8814	-0.26097	-0.436189	-0.41721	-1.0071	-1.04967	-1.29134	no change	no change	no change	down	down	down	2.82492e-05	0	0	NULL
Q9RTV1	DR_1655	17.7675	17.5355	11.4258	15.5105	7.90047	5.98884	5.06207	4.95122	21.4698	20.0214	11.458	13.7172	7.75872	7.10278	5.19579	4.07747	-0.390242	-1.34582	-1.81788	-0.720806	-1.48123	-2.16166	no change	down	down	no change	down	down	0.0113513	0	0	NULL
Q9RTV2	DR_1654	27.9675	19.0022	15.8599	16.9223	26.5728	22.9555	16.2988	20.5353	30.0477	18.218	24.4155	36.3021	23.8191	8.2245	25.7277	31.4208	-0.518815	0.0765225	-0.35069	0.331115	-0.590966	0.243714	no change	no change	no change	no change	no change	no change	0.00245806	0	0	NULL
Q9RTV3	DR_1653	0.19309	NULL	0.316286	NULL	0.129472	NULL	NULL	NULL	NULL	NULL	NULL	0.0716409	0.246462	NULL	0.402107	NULL	0.710106	-0.574311	-7.25062	5.82821	7.60168	8.30646	no change	no change	down	up	up	up	0.0705041	NULL	NULL	NULL
Q9RTV5	DR_1649	45.1777	58.1112	44.2051	54.1612	17.2164	19.9629	26.3614	40.4334	52.8114	58.4823	36.585	40.16	19.7929	12.1923	24.2636	29.4415	-0.0704494	-1.47411	-0.628879	-0.536228	-1.7989	-1.05124	no change	down	no change	no change	down	down	0.0534299	NULL	NULL	NULL
Q9RTV6	DR_1648	5.37673	3.7038	1.04166	2.83025	3.47686	4.03099	4.49291	5.08113	2.60253	1.76538	3.62829	5.41541	3.62526	3.61145	4.46435	5.91697	-1.22973	-0.274376	0.0763521	1.04997	0.72839	1.24897	down	no change	no change	up	no change	up	5.16529e-05	0	2	late_up
Q9RTV7	DR_1646	0.137696	0.4056	NULL	NULL	0.0265756	NULL	0.715806	0.842198	0.632531	NULL	0.153156	0.186757	0.0620211	NULL	0.0889641	0.0323905	-8.73834	-4.31944	1.51989	-0.897424	-3.33703	-2.38336	down	down	up	no change	down	down	4.91829e-05	1	0	NULL
Q9RTV8	DR_1645	0.250682	1.98811	0.624699	2.00972	2.2248	2.49372	1.49921	0.174234	0.765338	1.56162	1.6204	1.94662	0.85297	1.55902	1.30721	1.98142	0.234765	1.07562	-0.419895	0.616277	0.0517817	0.499041	no change	up	no change	no change	no change	no change	0.0235576	1	0	NULL
Q9RTV9	DR_1644	0.0244261	0.0304228	NULL	NULL	0.0713111	0.0305478	0.17899	0.223187	0.0568916	0.00978038	0.0510986	0.0511849	0.0774835	0.0725464	0.14711	0.0434889	-5.43013	0.893039	2.8743	0.617421	1.1701	1.51539	down	no change	up	no change	up	up	0.000113715	1	2	NULL
Q9RTW0	DR_1643	NULL	NULL	NULL	NULL	0.131224	0.0949144	NULL	0.129722	NULL	NULL	0.0474287	NULL	0.0989115	NULL	NULL	NULL	0	7.4738	6.67908	5.23965	6.29006	0	no change	up	up	up	up	no change	0.0511996	NULL	NULL	NULL
Q9RTW1	DR_1642	0.450741	0.425705	0.511393	0.291432	0.325708	0.310046	NULL	0.227477	NULL	NULL	0.332865	0.053363	0.243847	0.165673	0.106074	NULL	-0.12658	-0.463196	-1.94192	8.24605	8.33054	6.39029	no change	no change	down	up	up	up	0.00363331	0	3	late_up
Q9RTW2	DR_1641	3.51227	5.92762	2.90225	2.05867	3.86056	2.58398	3.96372	6.48218	3.68333	4.3806	2.87622	4.22142	0.534301	3.3344	4.62676	2.7583	-0.928161	-0.550693	0.146096	-0.184146	-1.05964	-0.126874	no change	no change	no change	no change	down	no change	0.111192	NULL	NULL	NULL
Q9RTW3	DR_1640	0.999912	0.426031	0.519539	0.555495	NULL	NULL	0.753545	0.470837	NULL	NULL	1.01297	0.777264	NULL	0.831202	0.769451	1.4212	-0.407535	-10.1304	-0.219863	10.4587	9.3529	10.7499	no change	down	no change	up	up	up	0.000662489	0	3	late_up
Q9RTW5	DR_1638	5.01464	3.82777	0.0908977	3.12749	1.39102	3.76404	1.83483	4.29845	2.42405	4.07592	0.200068	0.0109557	2.95727	3.26235	1.25604	2.12931	-1.4581	-0.778448	-0.527783	-4.94496	-0.0636069	-0.94113	down	no change	no change	down	no change	no change	0.212856	NULL	NULL	NULL
Q9RTW6	DR_1636	0.151963	NULL	NULL	NULL	NULL	NULL	NULL	NULL	0.215431	0.171646	0.24642	0.204014	0.316055	0.125815	NULL	NULL	-6.90635	-6.90635	-6.90635	0.218695	0.191002	-8.24922	down	down	down	no change	no change	down	0.00126542	0	0	NULL
Q9RTW7	DR_1635	1.50384	0.791341	0.841078	0.920648	0.448424	0.941727	0.765267	1.00387	0.692679	0.32398	2.93953	1.02565	2.16409	1.0611	0.576724	0.655779	-0.381621	-0.723368	-0.375563	1.96355	1.66555	0.277757	no change	no change	no change	up	up	no change	0.00569707	0	2	late_up
Q9RTW8	DR_1634	0.292068	0.195936	0.68653	0.554428	0.965307	1.4751	1.22566	1.83553	0.113798	0.513638	2.48789	2.41685	0.677387	0.180379	0.704998	1.08466	1.34649	2.32216	2.64913	2.96664	0.451115	1.51214	up	up	up	up	no change	up	9.09728e-09	3	2	sustain_up
Q9RTW9	DR_1633	0.318458	0.169558	0.321753	0.125042	0.198709	0.166215	0.381342	0.419246	0.409306	0.0393029	0.275711	0.257374	0.29122	0.0800392	0.407181	0.131747	-0.127314	-0.419331	0.714133	0.248908	-0.273033	0.264634	no change	no change	no change	no change	no change	no change	0.496495	NULL	NULL	NULL
Q9RTX0	DR_1632	1.04927	0.782369	0.388984	1.10872	1.13495	1.02471	0.831982	0.677827	1.61896	1.46499	1.32261	1.09367	1.26947	1.11533	0.665768	0.640004	-0.290383	0.237669	-0.278772	-0.351992	-0.37091	-1.23988	no change	no change	no change	no change	no change	down	0.00285872	0	0	NULL
Q9RTX1	DR_1631	0.329768	0.298933	0.21335	0.0595613	0.429758	0.504333	0.280596	0.0689053	0.226461	0.132893	0.0637171	0.205828	0.147027	0.0492287	0.202209	0.0565209	-1.20394	0.57119	-0.847073	-0.414878	-0.872667	-0.473958	down	no change	no change	no change	no change	no change	0.000745157	0	0	NULL
Q9RTX3	DR_1629	0.0880747	0.0653687	0.0978953	0.0229599	0.109529	0.174341	0.134876	0.137242	0.0475941	0.027912	0.071201	0.0747847	0.0603894	0.0884551	0.232064	0.1368	-0.344428	0.887525	0.826524	0.951163	0.979141	2.28842	no change	no change	no change	no change	no change	up	0.00515551	0	1	NULL
Q9RTX4	DR_1627	3.76061	7.24461	5.28116	6.84225	5.05263	4.55754	7.44168	8.96416	10.3713	9.27615	6.06195	4.76164	6.56044	6.31074	3.94315	5.27289	0.139607	-0.195555	0.576022	-0.860166	-0.6102	-1.09213	no change	no change	no change	no change	no change	down	2.9136e-06	0	0	NULL
Q9RTX5	DR_1626	5.55692	6.17739	4.83785	4.1894	4.62571	7.75207	2.53088	2.65508	4.89935	3.94686	4.29383	3.44642	4.22519	2.94561	4.2313	3.22278	-0.378374	0.0770194	-1.17805	-0.192679	-0.302926	-0.247029	no change	no change	down	no change	no change	no change	0.00179637	0	0	NULL
Q9RTX6	DR_1625	3.37737	3.31292	4.16603	4.17917	1.19844	2.12896	1.33146	1.26418	4.27355	4.36767	2.06235	3.74953	2.02544	1.38283	0.950331	2.97792	0.318876	-1.00767	-1.36598	-0.57223	-1.34219	-1.13735	no change	down	down	no change	down	down	0.0073322	0	0	NULL
Q9RTX7	DR_1623	10.8008	9.73085	8.28122	10.1332	13.6057	12.0438	27.4578	13.0104	6.54691	6.64293	16.2016	17.4647	16.9542	12.2279	20.4593	18.3702	-0.157012	0.321078	0.97894	1.35188	1.14565	1.55773	no change	no change	no change	up	up	up	0.017283	0	3	late_up
Q9RTX8	DR_1622	1.57848	1.80718	0.415422	0.335974	0.868358	0.598517	1.43184	0.874651	1.19466	1.29279	0.701085	0.0889474	1.18455	0.705762	1.62617	0.728223	-2.17179	-1.20669	-0.553733	-1.65469	-0.396042	-0.0793119	down	down	no change	down	no change	no change	0.147983	NULL	NULL	NULL
Q9RTX9	DR_1621	3.3726	12.4747	0.158873	6.16842	1.26326	4.37468	NULL	3.38644	2.30878	3.7251	0.740425	2.27376	0.341184	3.15681	0.262982	1.13424	-1.32458	-1.491	-2.22612	-1.00132	-0.786558	-2.11053	down	down	down	down	no change	down	0.385445	NULL	NULL	NULL
Q9RTY0	DR_1620	2.82243	4.51662	4.24721	6.20957	3.81565	7.62136	9.29711	9.74361	4.75057	6.89162	5.56529	6.68423	8.36654	8.27965	11.2242	12.1612	0.510774	0.640044	1.37542	0.0733645	0.51583	1.00625	no change	no change	up	no change	no change	up	0.450575	NULL	NULL	NULL
Q9RTY1	DR_1619	0.141802	0.173948	0.056358	0.0941921	0.872148	1.01722	0.405403	0.378553	1.23818	1.53055	0.360776	0.26186	1.04099	1.41073	0.781662	0.569292	-1.06854	2.58105	1.31199	-2.15276	-0.17543	-1.03525	down	up	up	down	no change	down	2.09296e-07	2	0	early_up
Q9RTY2	xpt	0.374983	NULL	0.0377258	0.0394597	0.524069	0.409415	0.298517	0.485808	0.00781267	NULL	0.355617	0.265813	0.351167	0.11449	0.496225	0.737564	-2.28287	1.31335	1.06218	6.20071	5.78439	7.19014	down	up	up	up	up	up	0.000382184	2	3	sustain_up
Q9RTY3	DR_1616	2.86095	3.37817	3.42735	4.46316	7.95183	8.35757	3.59533	3.61287	1.52646	1.57119	2.85937	3.33237	4.88303	3.40529	6.03428	4.99363	0.338774	1.38629	0.208296	0.999173	1.41991	1.83192	no change	up	no change	no change	up	up	9.1918e-09	1	2	NULL
Q9RTY5	leuD1	NULL	0.171773	NULL	NULL	0.15996	0.24707	NULL	NULL	NULL	0.570532	0.746748	0.616822	1.76224	0.642104	0.532396	1.55312	-7.08244	1.2393	-7.08244	1.2554	2.07365	1.86842	down	up	down	up	up	up	0.0795551	NULL	NULL	NULL
Q9RTY6	DR_1613	0.383654	0.069877	0.404204	0.151417	1.0686	0.229459	NULL	0.0369533	0.347239	0.10681	0.138068	0.0958664	0.156853	0.04793	0.0976792	0.155309	0.2929	1.51708	-3.5928	-0.956745	-1.14875	-0.843776	no change	up	down	no change	down	no change	0.023013	1	0	NULL
Q9RTY7	DR_1612	NULL	NULL	NULL	NULL	3.04657	3.65668	0.186407	0.202657	NULL	NULL	0.718814	0.51913	0.653971	1.20656	1.29757	1.57403	0	12.3634	8.25661	9.92647	10.5142	11.1404	no change	up	up	up	up	up	4.86499e-12	2	3	sustain_up
Q9RTY8	DR_1611	0.268842	0.224577	NULL	NULL	2.65476	1.39473	0.265855	NULL	1.14065	0.592551	1.03338	0.985568	3.29622	1.05275	1.68941	0.614887	-8.59941	3.03685	-0.888729	0.220166	1.32724	0.410893	down	up	no change	no change	up	no change	0.421121	NULL	NULL	NULL
Q9RTY9	leuC1	0.0267912	NULL	0.145692	0.0115024	0.230679	0.149725	0.0584797	0.0351517	0.063434	0.086955	0.0705527	0.00380696	0.232602	0.18163	0.0474571	0.0391645	2.51887	3.79385	1.77138	-1.01611	1.46174	-0.7959	up	up	up	down	up	no change	0.0858229	NULL	NULL	NULL
Q9RTZ0	DR_1608	0.0550066	0.139903	NULL	0.243276	1.26968	0.280631	0.795819	1.09652	0.917642	0.277406	1.4149	0.585286	5.90192	2.96256	3.71544	1.81687	0.32355	2.99168	3.27929	0.743062	2.89097	2.21081	no change	up	up	no change	up	up	0.00415965	2	2	sustain_up
Q9RTZ1	DR_1607	1.66943	0.576096	1.42926	1.87486	1.8797	3.71925	2.17828	3.00701	1.79308	1.45806	1.66262	1.72245	2.78622	2.89802	2.99735	2.54437	0.557216	1.3181	1.20737	0.0582427	0.806023	0.769392	no change	up	up	no change	no change	no change	0.760416	NULL	NULL	NULL
Q9RTZ2	DR_1606	0.128796	NULL	0.0165192	0.037322	0.0370169	0.00852354	0.0255236	0.0446841	NULL	NULL	NULL	0.00382087	0.0252795	0.0251007	0.0150273	0.0102045	-1.26541	-1.50697	-0.882491	1.8088	5.30753	4.30991	down	down	no change	up	up	up	0.153751	NULL	NULL	NULL
Q9RTZ3	DR_1604	0.115159	0.0886903	0.166138	0.11155	0.127243	0.0587501	0.172269	0.278984	0.0306608	0.00465129	0.0593429	0.328506	0.0384432	0.00678549	0.0339038	0.0391874	0.445959	-0.132252	1.14643	3.45726	0.357076	1.04954	no change	no change	up	up	no change	up	0.0113797	1	2	NULL
Q9RTZ4	DR_1603	1.09652	1.60375	0.647168	1.09047	0.19344	0.573768	0.229738	0.383455	1.2321	1.20509	0.822308	0.922445	0.464662	0.579124	0.263443	0.211961	-0.635977	-1.81541	-2.13869	-0.482193	-1.22339	-2.35799	no change	down	down	no change	down	down	0.420426	NULL	NULL	NULL
Q9RTZ5	DR_1602	0.297564	0.257786	0.106216	0.139323	0.212347	0.403833	0.162296	0.21804	0.125843	0.0576545	0.331416	0.4274	0.180337	0.154424	0.0563737	0.547637	-1.17745	0.149957	-0.546123	2.04799	0.867369	1.71881	down	no change	no change	up	no change	up	0.00301647	0	2	late_up
Q9RTZ6	DR_1601	3.19913	0.661415	5.54067	2.27692	2.20344	1.88162	3.86303	2.95529	1.05357	0.491583	1.51331	1.92621	1.47575	0.653692	2.31221	3.03289	1.01792	0.0815533	0.820614	1.15446	0.462731	1.79047	up	no change	no change	up	no change	up	0.419715	NULL	NULL	NULL
Q9RTZ7	DR_1600	0.367131	0.147917	0.352564	0.446213	0.100651	0.117008	0.600361	0.415452	0.172665	0.121808	0.288758	0.445797	0.628121	0.249996	1.02304	0.354182	0.633086	-1.24263	0.979856	1.31874	1.57628	2.22555	no change	down	no change	up	up	up	0.0782884	NULL	NULL	NULL
Q9RTZ8	DR_1599	NULL	0.0608992	0.0553138	0.068837	0.90162	0.801461	0.346916	0.491201	0.010616	NULL	0.151135	0.194809	0.0875034	0.0738371	1.3571	0.896855	1.01261	4.79059	3.76767	4.94227	3.84184	7.64612	up	up	up	up	up	up	1.77698e-09	3	3	sustain_up
Q9RTZ9	DR_1598	1.94975	1.96432	1.28712	1.31748	2.71247	2.67394	2.03528	2.05785	8.70811	10.5353	2.38	3.37092	7.23159	9.02134	3.12238	2.98207	-0.587607	0.460652	0.0645327	-1.7425	-0.243665	-1.65643	no change	no change	no change	down	no change	down	3.82997e-09	0	0	NULL
Q9RU00	DR_1597	0.470957	0.225841	0.882462	0.477622	0.513543	0.580304	0.342854	0.644688	0.773981	0.49064	0.780366	1.00561	0.57196	1.30223	0.730415	1.01238	0.964884	0.650599	0.503102	0.498005	0.567561	0.462696	no change	no change	no change	no change	no change	no change	0.814168	NULL	NULL	NULL
Q9RU01	zwf	13.4091	18.3559	17.318	16.4291	7.09546	6.18565	11.5046	10.7098	13.4973	11.4431	10.7108	12.4308	8.52475	7.54436	9.8592	8.30911	0.0873256	-1.25806	-0.515943	-0.107995	-0.634194	-0.457059	no change	down	no change	no change	no change	no change	0.000512958	0	0	NULL
Q9RU02	DR_1595	3.25085	1.4475	2.8495	2.57932	7.37446	5.62128	4.24388	4.39389	3.67203	4.5408	7.09449	6.02666	12.6122	7.97914	11.6122	11.5148	0.208485	1.46782	0.878507	0.675943	1.32609	1.49363	no change	up	no change	no change	up	up	0.00144994	1	2	NULL
Q9RU04	tnpB	0.0151828	NULL	NULL	0.0550651	NULL	0.0251528	0.0111087	0.00916712	NULL	0.0482613	0.00203894	NULL	0.00521838	0.0017878	0.0096679	NULL	1.81607	0.705104	0.358119	-4.19214	-2.80305	-2.24655	up	no change	no change	down	down	down	0.0964592	NULL	NULL	NULL
Q9RU06	DR_1590	1.76426	5.5489	4.74235	4.79411	3.73649	3.00195	8.10807	3.9698	5.09824	0.412734	5.5729	1.01388	3.62278	2.34235	7.82609	3.85733	0.382958	-0.118082	0.723798	0.257267	0.114248	1.08408	no change	no change	no change	no change	no change	up	0.914312	NULL	NULL	NULL
Q9RU07	DR_1589	9.43657	5.37803	14.5654	16.5086	26.3292	25.1234	6.30491	6.88073	52.8968	31.2202	11.6893	8.85307	27.8239	29.1228	26.303	18.04	1.06869	1.79622	-0.168053	-2.0338	-0.562786	-0.923692	up	up	no change	down	no change	no change	2.43831e-06	2	0	early_up
Q9RU08	DR_1588	2.08482	2.94311	2.31927	3.70077	1.51902	2.17155	3.23024	4.45586	1.02919	4.22448	2.82539	1.81014	1.77249	1.79164	1.61751	2.15958	0.259807	-0.446124	0.612284	-0.180591	-0.559775	-0.47605	no change	no change	no change	no change	no change	no change	0.087105	NULL	NULL	NULL
Q9RU09	DR_1587	3.36801	5.49725	3.78318	3.69084	1.76849	4.07248	1.27482	0.466351	2.94432	5.41221	2.80502	2.54592	3.22118	3.27853	4.29515	3.09488	-0.246278	-0.601954	-2.34811	-0.643113	-0.362529	-0.177324	no change	no change	down	no change	no change	no change	0.00242631	0	0	NULL
Q9RU10	murI	0.0772774	0.022438	NULL	NULL	0.0582816	0.134865	0.187814	0.300108	NULL	NULL	0.0665186	NULL	0.372645	0.487412	0.431797	0.0726818	-6.29249	0.953805	2.29076	5.72216	9.40103	8.63139	down	no change	up	up	up	up	0.00139261	1	3	NULL
Q9RU11	rph	0.746915	0.0514701	0.992128	0.536408	0.161111	0.187306	1.75139	2.29374	0.741923	0.716995	0.888862	0.757163	1.1537	1.10997	1.03535	0.94245	0.936994	-1.19627	2.34103	0.174088	0.633769	0.438996	no change	down	up	no change	no change	no change	4.67205e-07	1	0	NULL
Q9RU14	DR_1582	0.908962	0.161401	NULL	0.60823	NULL	0.471176	NULL	NULL	NULL	NULL	0.107784	0.106236	0.32178	0.12474	0.270386	0.28913	-0.813905	-1.18182	-9.71663	7.39434	8.45532	8.78078	no change	down	down	up	up	up	0.0155803	0	3	late_up
Q9RU15	DR_1581	0.0879098	0.0939169	0.128455	0.182238	0.233702	0.538114	0.326163	0.17718	NULL	NULL	0.0650938	0.122176	0.0186929	0.109535	0.252737	0.399745	0.772925	2.08569	1.46898	7.20172	6.65531	9.00254	no change	up	up	up	up	up	0.00124046	2	3	sustain_up
Q9RU16	DR_1580	0.0504774	0.349466	0.801279	1.67935	0.483004	0.765661	0.133239	0.299201	0.34743	0.290797	0.230344	0.872376	0.24218	0.0240669	NULL	0.420257	2.63284	1.64252	0.112701	0.788925	-1.26131	-0.600617	up	up	no change	no change	down	no change	0.0188262	2	0	early_up
Q9RU17	DR_1579	7.42085	11.2791	13.1183	13.2249	12.4964	16.189	9.30287	11.2613	17.1419	23.2197	12.5001	16.364	14.9247	16.7359	15.2684	11.9143	0.494392	0.617278	0.137098	-0.483702	-0.350289	-0.570293	no change	no change	no change	no change	no change	no change	0.000644036	0	0	NULL
Q9RU18	DR_1578	0.308014	3.16842	5.33916	5.37586	1.98156	5.3984	2.30729	0.169214	1.56269	1.86866	4.82731	2.76311	1.59716	1.96763	2.53393	4.70621	1.62395	1.086	-0.489304	1.14541	0.0550428	1.07724	up	up	no change	up	no change	up	0.00898178	2	2	sustain_up
Q9RU19	queA	0.931759	0.620852	1.12858	0.842694	3.33511	2.39631	3.10407	1.95691	1.2016	0.775203	1.41514	1.52971	3.42964	2.49536	1.67128	1.29131	0.344433	1.8842	1.70472	0.575024	1.58365	0.583691	no change	up	up	no change	up	no change	0.00558453	2	1	NULL
Q9RU20	DR_1576	3.41566	2.01998	0.58255	0.99816	0.496926	1.86263	1.84028	1.59121	3.72157	1.98864	1.57806	0.587541	1.971	1.10394	0.288034	0.16741	-1.78188	-1.20393	-0.663617	-1.39878	-0.892989	-3.6482	down	down	no change	down	no change	down	0.0222219	0	0	NULL
Q9RU21	DR_1575	0.0805054	NULL	NULL	NULL	NULL	NULL	0.291922	NULL	NULL	NULL	0.26062	NULL	NULL	NULL	NULL	NULL	-5.99511	-5.99511	1.85021	7.68206	0	0	down	down	up	up	no change	no change	0.0282912	1	1	NULL
Q9RU22	DR_1574	1.23105	0.186556	2.40127	2.70835	3.21133	2.64967	2.58134	1.37796	2.03045	0.272335	1.95878	0.902099	2.02378	4.01495	3.13985	4.13757	1.84976	2.04768	1.48178	0.313077	1.39086	1.66005	up	up	up	no change	up	up	0.0107	3	2	sustain_up
Q9RU23	pyrG	1.23435	3.22123	3.87246	1.76864	4.89713	3.76258	1.87041	2.35713	4.4543	4.17148	8.59567	7.45641	4.021	2.27006	3.45229	2.53212	0.340361	0.958703	-0.0757977	0.896033	-0.455351	-0.527446	no change	no change	no change	no change	no change	no change	5.4217e-06	0	0	NULL
Q9RU24	DR_1571	154.531	158.357	125.131	134.413	69.4024	83.5426	94.32	136.154	149.334	193.229	125.061	123.714	66.8417	94.2575	94.1956	112.114	-0.269665	-1.03263	-0.441043	-0.461531	-1.08842	-0.731559	no change	down	no change	no change	down	no change	0.307985	NULL	NULL	NULL
Q9RU25	DR_1570	6.03422	4.74057	2.80352	2.49039	3.64246	4.87442	3.48592	3.67856	4.55982	3.55333	3.95726	5.68053	3.50897	2.59867	3.02867	5.77784	-1.02525	-0.339263	-0.588727	0.248439	-0.409649	0.118307	down	no change	no change	no change	no change	no change	0.00116425	0	0	NULL
Q9RU26	DR_1569	8.19604	8.24577	7.73836	6.37078	4.65405	4.40883	7.60386	10.6589	5.20275	3.65382	10.6443	9.55293	9.81745	6.99688	11.1012	9.33664	-0.220739	-0.859327	0.151533	1.18934	0.924871	1.20642	no change	no change	no change	up	no change	up	6.64923e-06	0	2	late_up
Q9RU27	DR_1568	22.3521	28.1268	26.9839	19.7085	24.0565	24.3644	36.3195	37.9215	15.0058	15.9919	24.5087	23.992	24.2608	21.8362	21.8069	19.5284	-0.112492	-0.0600515	0.556535	0.64585	0.572516	0.415214	no change	no change	no change	no change	no change	no change	7.53612e-07	0	0	NULL
Q9RU28	DR_1567	22.5724	19.8858	23.9755	24.332	17.4385	12.0691	28.419	12.204	6.3444	9.18402	24.7417	21.3973	18.6591	11.2552	15.2723	13.7731	0.186204	-0.524958	-0.0637463	1.57107	0.945922	0.903395	no change	no change	no change	up	no change	no change	0.0134207	0	1	NULL
Q9RU30	DR_1565	6.54611	5.58024	3.30686	3.79109	3.89789	3.27994	2.53664	2.61214	9.27943	8.99904	4.14135	5.4197	3.77761	5.72371	2.51014	2.73244	-0.772671	-0.756525	-1.23584	-0.934903	-0.943946	-1.8018	no change	no change	down	no change	no change	down	0.000432787	0	0	NULL
Q9RU31	DR_1564	0.183548	0.175246	NULL	0.0572543	0.25685	NULL	0.236551	0.147507	0.539521	0.154776	0.164349	NULL	0.305283	0.275975	0.147802	0.020778	-2.63176	-0.478661	0.0981693	-2.07321	-0.256375	-2.04212	down	no change	no change	down	no change	down	0.063149	NULL	NULL	NULL
Q9RU32	upp	2.1948	2.77442	2.5345	1.50497	4.18419	11.3527	2.58195	3.11932	5.26456	5.05696	4.62521	5.17383	5.70968	5.01878	4.51606	6.37228	-0.298854	1.64461	0.198266	-0.0749433	0.0557884	0.0771283	no change	up	no change	no change	no change	no change	0.00863252	1	0	NULL
Q9RU33	DR_1562	0.830678	0.470523	NULL	0.589422	0.296264	0.21417	5.6047	0.481465	1.08577	0.608299	5.03942	0.635882	NULL	0.422994	0.812055	0.376327	-1.14091	-1.35005	2.22569	1.7442	-1.99962	-0.511498	down	down	up	up	down	no change	0.0213606	1	1	NULL
Q9RU34	DR_1561	1.91529	0.724122	1.27088	1.26426	2.33466	0.900088	1.43377	1.0449	1.90317	1.31215	2.94845	1.83827	2.32692	1.01586	2.26606	0.933174	-0.0581503	0.293435	-0.0906531	0.574078	0.0560891	-0.00723168	no change	no change	no change	no change	no change	no change	0.344913	NULL	NULL	NULL
Q9RU35	DR_1560	0.155621	0.0908584	NULL	0.0942731	0.262551	0.238232	0.0351316	0.0390495	0.0893121	0.0617627	0.181546	0.139764	0.261178	0.0519461	0.233948	0.262478	-1.37685	1.02272	-1.73234	1.08871	1.05147	1.71632	down	up	down	up	up	up	4.72063e-05	1	3	NULL
Q9RU37	DR_1558	NULL	NULL	NULL	NULL	0.0685267	NULL	NULL	NULL	NULL	NULL	NULL	NULL	NULL	NULL	0.0217326	0.0182177	0	5.76467	0	0	0	4.97288	no change	up	no change	no change	no change	up	0.0118434	1	1	NULL
Q9RU38	DR_1557	NULL	NULL	NULL	NULL	0.0246774	0.0311471	0.105845	0.0087117	0.0134626	0.00167304	NULL	NULL	0.156353	0.0161045	0.0531717	NULL	0	5.45557	6.49267	-3.57263	3.51022	1.82986	no change	up	up	down	up	up	0.150683	NULL	NULL	NULL
Q9RU39	DR_1556	NULL	NULL	0.00249273	NULL	0.00419878	0.00328064	0.0144695	0.00703515	NULL	NULL	0.00533597	0.00792462	NULL	NULL	0.021937	0.0354901	1.29835	2.55567	4.07932	3.38182	0	5.4964	up	up	up	up	no change	up	4.07104e-05	3	2	sustain_up
Q9RU40	DR_1555	0.0754749	0.0158132	0.192948	0.262878	0.609734	1.14695	0.0374117	0.241056	NULL	0.090326	0.356934	0.356439	0.0432457	0.112736	0.578788	0.534997	2.31998	4.26628	1.60901	2.97132	0.778038	3.61406	up	up	up	up	no change	up	2.02069e-07	3	2	sustain_up
Q9RU41	prfC	0.470221	0.0824509	0.387946	0.0626043	0.787633	0.602115	0.458745	0.768959	0.874981	1.23715	0.94161	0.712609	0.568129	0.282405	0.628359	0.694092	-0.294735	1.33033	1.15147	-0.352552	-1.31226	-0.675488	no change	up	up	no change	down	no change	2.83723e-05	2	0	early_up
Q9RU42	DR_1552	NULL	0.237701	NULL	0.017375	NULL	NULL	0.107544	NULL	0.0947892	0.187973	0.0935046	NULL	0.153392	NULL	0.0411259	NULL	-3.72605	-7.54961	-1.13957	-1.5867	-0.876397	-2.75933	down	down	down	down	no change	down	0.461786	NULL	NULL	NULL
Q9RU43	DR_1551	3.61641	2.58724	1.55232	1.36319	5.13403	6.75626	1.17567	1.15084	9.82363	6.30482	2.60119	2.64091	13.763	14.21	4.36482	5.42509	-1.08937	0.938595	-1.41495	-1.62139	0.794423	-0.72024	down	no change	down	down	no change	no change	5.58658e-06	0	0	NULL
Q9RU44	ftsE	0.267163	0.252545	0.366193	0.272543	0.211317	0.231552	0.452289	0.429046	0.303553	0.238646	0.111414	0.217864	0.045878	0.0736333	0.124958	0.113068	0.297517	-0.230821	0.761986	-0.719514	-2.18167	-1.1877	no change	no change	no change	no change	down	down	3.86732e-07	0	0	NULL
Q9RU45	DR_1549	NULL	0.0300585	0.0434917	0.0271078	0.0210784	0.0185823	0.0865801	0.0507035	NULL	NULL	0.0727979	0.00686135	NULL	0.0117283	NULL	0.0249342	1.20168	0.369728	2.16111	5.96851	3.28087	4.32914	up	no change	up	up	up	up	0.0229346	2	3	sustain_up
Q9RU48	sodC	16.2631	18.4415	5.2494	10.7096	12.9385	17.1653	17.1419	28.8269	8.80408	14.282	18.2719	9.53639	13.8089	17.1196	24.31	14.9175	-1.12076	-0.20518	0.40553	0.268489	0.421911	0.764839	down	no change	no change	no change	no change	no change	0.0526765	NULL	NULL	NULL
Q9RU49	DR_1545	0.0513345	0.0475872	0.0754538	0.0159499	0.0850535	0.080315	0.18007	0.179259	0.0718808	0.0810627	0.0439629	0.0327109	0.0490399	0.0603621	0.133341	0.0133315	-0.114034	0.741326	1.86095	-0.996195	-0.48336	-0.0604048	no change	no change	up	no change	no change	no change	0.00141921	1	0	NULL
Q9RU50	DR_1544	4.87056	4.52029	3.89285	5.54369	11.13	12.6305	13.2447	17.1386	8.4649	10.1703	8.99948	10.1118	16.647	17.2686	7.81759	7.54613	0.00700265	1.33924	1.69395	0.0363942	0.863916	-0.278505	no change	up	up	no change	no change	no change	1.38748e-09	2	0	early_up
Q9RU52	DR_1542	0.270303	0.253878	0.626777	0.75841	0.901928	0.761438	1.00154	1.16726	0.182634	0.115366	0.517069	0.544667	1.12274	0.599225	0.789357	0.559068	1.40194	1.66597	2.04876	1.83304	2.53067	2.17789	up	up	up	up	up	up	0.0255137	3	3	sustain_up
Q9RU53	DR_1541	0.423697	0.150805	0.161442	0.235083	0.134875	0.44114	NULL	0.00806363	0.0628411	0.462443	0.0804498	0.544624	0.0366177	0.0590593	0.0381036	0.0383349	-0.534902	0.00379224	-6.0452	0.250928	-2.45685	-2.78073	no change	no change	down	no change	down	down	0.152923	NULL	NULL	NULL
Q9RU54	DR_1540	37.9961	61.8956	93.0953	70.993	98.3608	68.04	111.848	169.464	56.4595	69.519	114.091	133.378	91.0912	93.5622	91.6296	86.4226	0.716037	0.736226	1.49374	0.974074	0.551643	0.499123	no change	no change	up	no change	no change	no change	0.000176505	1	0	NULL
Q9RU55	DR_1539	NULL	NULL	1.62147	1.59227	6.25537	0.112315	6.43288	6.13707	0.0486212	NULL	9.30644	3.58394	0.0400072	0.849944	4.11308	8.32544	11.3028	12.2893	13.2704	8.03174	4.17532	7.98026	up	up	up	up	up	up	0.0094669	3	3	sustain_up
Q9RU56	DR_1538	22.4239	30.2868	37.9958	38.117	21.6962	17.3214	30.7075	24.1659	10.6809	11.4831	15.6477	11.4527	10.508	4.06889	11.6636	11.3114	0.530043	-0.433974	0.0580094	0.290105	-0.604532	0.0518511	no change	no change	no change	no change	no change	no change	0.00273163	0	0	NULL
Q9RU57	DR_1537	0.704209	0.906137	1.02733	0.619683	2.17046	3.98436	0.974405	1.58797	0.881564	0.385302	2.57198	0.805209	2.82115	3.21971	1.86983	1.10938	0.0324853	1.93435	0.670111	1.41456	2.25349	1.23367	no change	up	no change	up	up	up	0.310045	NULL	NULL	NULL
Q9RU58	DR_1536	1.20525	1.08516	0.456894	0.548038	0.500856	0.409782	1.68733	1.80038	1.04211	1.32179	0.326282	0.450939	0.999121	0.865849	0.692545	1.14688	-1.18851	-1.33066	0.60667	-1.60477	-0.342014	-0.361912	down	down	no change	down	no change	no change	1.44583e-07	0	0	NULL
Q9RU59	DR_1535	3.5823	3.00992	1.77914	2.74906	1.76832	2.65617	6.02936	5.21594	4.27466	2.40539	2.13347	2.28601	3.73366	2.32589	3.36149	3.38407	-0.541829	-0.575256	0.770484	-0.595981	-0.140648	0.0140807	no change	no change	no change	no change	no change	no change	0.0005502	0	0	NULL
Q9RU60	DR_1534	NULL	0.42875	0.122228	NULL	0.499846	0.542337	0.256374	NULL	0.118145	0.137642	0.283443	0.317843	0.177855	0.098933	0.947612	0.703792	-1.80521	1.27926	-0.740452	1.23311	0.113839	2.69068	down	up	no change	up	no change	up	6.74515e-07	1	2	NULL
Q9RU61	DR_1533	0.0151804	0.0230585	0.0194052	0.0134038	0.0207772	0.0320915	0.0293947	0.0341659	0.0179408	0.0954898	0.00954216	0.0249456	0.0216035	0.0450967	0.0189884	0.0183326	-0.220952	0.467373	0.733091	-1.71765	-0.766047	-1.60375	no change	no change	no change	down	no change	down	0.0555019	NULL	NULL	NULL
Q9RU62	mfd	1.15165	0.298478	0.414657	0.631999	0.953883	0.807667	0.899965	0.997843	1.21863	0.639953	0.485572	0.301842	1.51539	0.434343	0.536038	0.700852	-0.470394	0.280665	0.388154	-1.23901	0.0690738	-0.587487	no change	no change	no change	down	no change	no change	0.360141	NULL	NULL	NULL
Q9RU63	DR_1531	NULL	NULL	NULL	NULL	0.496955	0.212136	NULL	NULL	NULL	NULL	NULL	0.0528525	NULL	NULL	NULL	NULL	0	9.12257	0	5.3939	0	0	no change	up	no change	up	no change	no change	1.66519e-05	1	1	NULL
Q9RU64	DR_1530	0.122617	0.389356	0.438033	0.311594	1.01521	0.406183	0.0573306	0.118025	0.98578	1.43999	0.553328	0.247403	NULL	0.0412924	0.374967	0.613417	0.550105	1.47317	-1.54578	-1.59905	-5.85437	-1.2953	no change	up	down	down	down	down	1.33074e-06	1	0	NULL
Q9RU65	nnrD	2.20994	2.18344	1.0767	1.11881	1.00603	1.09176	1.47439	1.64871	1.01377	1.58333	0.994037	1.34046	0.796313	0.726662	0.736193	0.640298	-1.00078	-1.06646	-0.492355	-0.153787	-0.770008	-0.915906	down	down	no change	no change	no change	no change	7.5699e-06	0	0	NULL
Q9RU66	DR_1528	0.139446	NULL	0.31417	0.198138	1.23502	1.52479	0.198397	0.401108	0.155394	0.0732422	0.348037	0.76084	0.0584265	0.164266	0.614133	0.993337	1.87074	4.30022	2.0975	2.27797	-0.038	2.81367	up	up	up	up	no change	up	4.77166e-09	3	2	sustain_up
Q9RU67	DR_1527	NULL	NULL	NULL	0.0904969	0.168841	0.0791107	NULL	NULL	NULL	NULL	0.0238592	0.00590777	0.0972054	0.0900575	0.0786566	0.024588	6.16264	7.60666	0	4.54838	7.20167	6.34267	up	up	no change	up	up	up	0.0355409	2	3	sustain_up
Q9RU68	rsmA	0.860896	1.00455	0.636945	0.968274	0.0643753	0.760557	0.38301	0.0294034	1.91885	1.26065	0.252643	0.217166	2.29063	2.47842	1.05273	0.542574	-0.216753	-1.17718	-2.17736	-2.75865	0.584904	-0.99497	no change	down	down	down	no change	no change	2.82357e-07	0	0	NULL
Q9RU69	DR_1525	0.0564592	0.327302	0.792751	0.422724	3.78449	3.19476	2.5416	2.18182	0.0516607	0.566475	0.851403	1.75162	0.577481	1.17967	2.49921	3.2351	1.66324	4.18479	3.62155	2.07419	1.50724	3.21362	up	up	up	up	up	up	7.09834e-08	3	3	sustain_up
Q9RU70	DR_1524	1.41472	1.60939	0.923081	0.493191	0.950262	1.09139	0.192691	0.414814	1.78097	0.65223	0.7688	1.1085	0.663504	0.421036	0.424053	0.900186	-1.09441	-0.566773	-2.31554	-0.374191	-1.16577	-0.877689	down	no change	down	no change	down	no change	0.0270034	0	0	NULL
Q9RU71	proC	2.53704	1.05363	1.09348	0.781303	4.90302	5.67269	6.89251	7.0023	2.47148	0.710967	8.79697	4.32977	6.78266	4.0637	10.3748	7.02649	-0.937524	1.55843	1.95222	2.0443	1.769	2.45099	no change	up	up	up	up	up	0.00210181	2	3	sustain_up
Q9RU72	prmA	0.00139852	NULL	0.149552	1.20037	0.866281	0.963648	0.0910688	0.0931271	NULL	0.144449	0.589346	0.421167	0.46295	0.29144	1.07127	1.03331	9.37392	9.81283	6.50036	2.80012	2.37841	3.85857	up	up	up	up	up	up	3.96664e-05	3	3	sustain_up
Q9RU73	DR_1520	0.0977115	0.0675131	NULL	NULL	NULL	0.298417	0.181134	0.530418	0.326215	0.839196	0.220763	0.187235	0.221595	0.366356	0.0512587	0.170049	-7.02103	0.855975	2.10654	-1.51421	-0.98707	-2.39671	down	no change	up	down	no change	down	0.00110646	1	0	NULL
Q9RU74	ilvC	3.93314	2.34983	4.42396	8.79573	10.2605	9.00088	7.2184	6.01451	1.96307	2.73842	5.72418	3.57653	10.5084	3.94361	8.73838	9.56462	1.07317	1.61619	1.07461	0.984223	1.62008	1.96089	up	up	up	no change	up	up	0.0495425	3	2	sustain_up
Q9RU76	DR_1516	0.183106	0.383987	0.821288	0.950902	0.531395	0.575714	0.42116	0.749007	0.408115	NULL	0.575499	0.403156	0.269832	0.137608	0.652757	0.631381	1.64388	0.96514	1.04506	1.25958	-0.00463469	1.65151	up	no change	up	up	no change	up	0.00627562	2	2	sustain_up
Q9RU78	DR_1514	1.94357	0.19739	0.271108	0.309533	0.39355	0.345304	0.539372	0.620079	0.237033	0.178788	0.219358	0.322758	0.48925	0.536085	0.358338	0.296515	-1.88254	-1.5349	-0.884815	0.382637	1.30206	0.655207	down	down	no change	no change	up	no change	0.0599683	NULL	NULL	NULL
Q9RU79	rpsB	156.499	118.779	85.9775	157.917	129.921	133.638	70.0665	108.804	126.36	86.7264	181.959	162.923	94.2937	103.501	107.04	118	-0.174633	-0.0627621	-0.621971	0.69466	-0.107441	0.0787385	no change	no change	no change	no change	no change	no change	0.00178379	0	0	NULL
Q9RU80	tsf	2.69749	0.44532	7.66783	6.07678	58.2648	31.0913	9.28289	4.87573	0.269147	0.618077	55.2968	53.1779	21.793	18.0655	26.5579	46.6244	2.12874	4.82944	2.17155	6.93384	5.48944	6.36605	up	up	up	up	up	up	8.94831e-08	3	3	sustain_up
Q9RU81	pyrH	5.5158	25.364	21.3159	21.3883	15.8181	9.77638	27.6384	6.87436	26.7449	28.5834	23.766	30.7075	12.7997	15.802	16.3275	14.0785	0.467715	-0.270831	0.16047	-0.0224623	-0.951912	-0.863661	no change	no change	no change	no change	no change	no change	0.161055	NULL	NULL	NULL
Q9RU82	frr	0.0276959	0.359546	0.133195	0.476378	5.55113	3.48693	1.51754	1.86774	0.250927	0.171317	7.25537	5.11255	5.26503	4.9009	5.61309	2.47895	0.654564	4.54471	3.12797	4.87238	4.58952	4.26035	no change	up	up	up	up	up	2.60397e-05	2	3	sustain_up
Q9RU83	DR_1509	0.355332	1.22565	0.489208	0.372558	0.0937295	0.148171	0.337304	1.37708	0.203151	0.289362	0.584144	NULL	0.155569	0.430627	0.465662	0.447203	-0.875453	-2.70833	0.116866	0.247733	0.251222	0.89024	no change	down	no change	no change	no change	no change	0.141494	NULL	NULL	NULL
Q9RU84	dxr	0.105204	NULL	0.0361081	0.0128068	0.335953	0.244775	NULL	NULL	0.155686	0.151669	0.0625165	0.0212195	0.102069	0.0947211	0.125861	0.126244	-1.11354	2.45597	-6.37849	-1.87599	-0.64325	-0.285883	down	up	down	down	no change	no change	4.09057e-08	1	0	NULL
Q9RU85	DR_1507	0.843283	0.259315	1.58091	1.24159	0.930362	1.39469	0.48653	0.229364	0.534898	0.281148	0.641053	0.266089	0.216729	0.262308	0.293108	0.512558	1.35607	1.07636	-0.623089	0.152677	-0.768513	-0.0184682	up	up	no change	no change	no change	no change	0.00014192	2	0	early_up
Q9RU86	nuoA	0.115789	NULL	NULL	NULL	0.214977	0.282397	0.0225668	NULL	NULL	NULL	NULL	NULL	NULL	0.022068	NULL	0.139997	-6.51601	2.09492	-2.32703	0	4.15762	6.78854	down	up	down	no change	up	up	9.39183e-06	1	2	NULL
Q9RU88	nuoC	0.0563326	0.389404	0.0411929	0.102495	0.524321	0.0756407	2.27524	0.0602431	0.643083	0.140199	0.332385	0.268785	0.21379	0.15587	0.102547	0.0439494	-1.63325	0.42868	2.38946	-0.38176	-1.08333	-2.41867	down	no change	up	no change	down	down	0.0479684	1	0	NULL
Q9RU89	nuoD	0.340806	0.0261633	0.175771	0.00141634	0.87546	0.626496	1.88963	1.58297	0.443736	0.124387	0.208689	0.0657025	0.808776	0.967831	0.687301	0.612568	-1.05039	2.03311	3.24228	-1.04997	1.64485	1.19409	down	up	up	down	up	up	1.5563e-07	2	2	sustain_up
Q9RU91	DR_1501	0.217141	0.177482	0.158523	0.160729	0.924299	0.830873	0.311391	0.630962	0.12923	0.154041	0.345123	0.381805	0.794555	0.214174	1.13653	1.49829	-0.305784	2.15306	1.25579	1.35963	1.83229	3.21745	no change	up	up	up	up	up	6.21737e-06	2	3	sustain_up
Q9RU92	DR_1500	0.030359	0.025018	0.0338306	NULL	0.126915	0.135525	0.290446	0.120256	0.0839405	0.00607706	0.0608116	0.0237916	0.33582	0.147594	0.729687	0.293869	-0.684084	2.24463	2.89073	-0.0894934	2.42498	3.50724	no change	up	up	no change	up	up	0.047215	2	2	sustain_up
Q9RU93	DR_1499	NULL	0.00883912	NULL	0.00233301	0.1568	0.299552	0.0587948	0.0545615	0.00794583	0.00154405	0.0609437	0.00724743	0.219605	0.122826	0.226128	0.166176	-1.67414	5.58985	3.58057	2.84512	5.17328	5.36944	down	up	up	up	up	up	0.0010002	2	3	sustain_up
Q9RU94	nuoH	0.10223	0.141453	0.0403668	0.0258071	0.854689	0.583719	0.543023	0.614687	NULL	NULL	0.121495	0.0737245	0.749369	0.672115	0.716869	0.48718	-1.88067	2.5614	2.2482	7.2617	10.1259	9.88642	down	up	up	up	up	up	0.134655	NULL	NULL	NULL
Q9RU95	nuoI	NULL	NULL	NULL	0.0124814	0.131734	0.185999	0.0764613	0.0304657	NULL	0.180081	NULL	NULL	0.0601212	0.00624201	0.293181	0.192377	3.36616	7.96442	6.39323	-7.15033	-1.44527	1.42591	up	up	up	down	down	up	2.87238e-05	3	1	NULL
Q9RU96	DR_1496	5.4933	0.661374	2.76378	6.44821	3.54956	5.60513	10.5645	15.5581	0.143686	NULL	4.92656	1.00064	0.938858	9.03932	7.83434	8.05925	0.581831	0.572827	2.08555	5.35999	6.11141	6.78301	no change	no change	up	up	up	up	0.195075	NULL	NULL	NULL
Q9RU97	nuoK	0.591229	NULL	0.80691	1.14222	NULL	1.17408	4.40144	4.02593	NULL	0.120459	0.469644	NULL	0.314094	0.1711	1.75695	1.91139	1.71949	0.988976	3.83174	1.95739	2.00243	4.92092	up	no change	up	up	up	up	8.53969e-06	2	3	sustain_up
Q9RU98	DR_1494	0.252632	0.415918	0.100087	0.0875893	0.296517	0.428949	1.29246	2.42473	NULL	0.0492283	NULL	0.2019	0.16651	1.06126	0.819751	1.22883	-1.83278	0.117873	2.4751	2.0221	4.62189	5.36047	down	no change	up	up	up	up	0.0177972	1	3	NULL
Q9RUA0	nuoN	NULL	0.0608312	0.231041	0.164424	1.15996	0.74675	NULL	0.11026	0.0407236	0.699039	0.0292972	0.198217	0.498355	0.106594	1.02542	1.10677	2.68566	4.95512	0.851321	-1.70111	-0.290251	1.5272	up	up	no change	down	no change	up	1.05476e-06	2	1	NULL
Q9RUA1	DR_1491	0.216523	0.164943	0.202034	0.231697	0.10039	0.177014	NULL	0.0735085	0.232385	0.210206	0.112326	0.178367	0.0258947	0.112656	0.107523	0.124764	0.185246	-0.459563	-2.36314	-0.606478	-1.67556	-0.930066	no change	no change	down	no change	down	no change	0.00063974	0	0	NULL
Q9RUA2	DR_1490	4.5573	4.77285	0.715395	0.502827	1.38617	0.799699	2.49422	4.24349	4.878	6.64686	3.38508	3.90679	3.94506	4.15961	3.29352	2.58716	-2.93712	-2.0937	-0.469643	-0.660388	-0.507925	-0.970694	down	down	no change	no change	no change	no change	2.40437e-05	0	0	NULL
Q9RUA3	DR_1488	1.98233	2.18038	1.77066	2.53382	1.12839	1.36414	2.0533	3.33693	2.17024	1.70203	1.32597	1.62819	3.49342	3.83496	8.9724	1.52004	0.0483178	-0.739916	0.372823	-0.390433	0.920313	1.4381	no change	no change	no change	no change	no change	up	0.111883	NULL	NULL	NULL
Q9RUA4	DR_1487	0.975643	0.321546	1.47884	1.72492	5.55169	7.16237	3.06007	3.28967	1.45073	0.578167	2.48885	4.4106	9.57811	10.6985	5.78011	5.53614	1.30438	3.29296	2.29131	1.76579	3.32105	2.47963	up	up	up	up	up	up	0.000389005	3	3	sustain_up
Q9RUA6	DR_1485	0.496581	1.14348	1.85551	1.55142	0.687316	1.88815	1.36617	1.391	0.595548	0.597057	0.75087	1.52646	0.633778	1.12724	0.609618	0.972956	1.05472	0.651088	0.749438	0.933226	0.562291	0.408156	up	no change	no change	no change	no change	no change	0.711387	NULL	NULL	NULL
Q9RUA7	DR_1484	1.18576	1.7876	0.718565	0.372065	1.53507	1.13968	2.26748	3.06441	1.89915	2.2989	1.5398	1.88093	1.37233	2.27286	2.2464	2.71539	-1.44693	-0.15269	0.842553	-0.295416	-0.203725	0.241142	down	no change	no change	no change	no change	no change	0.00739692	0	0	NULL
Q9RUA8	DR_1483	108.279	132.713	126.651	102.724	60.3587	62.187	93.0902	96.7744	74.353	78.1631	76.996	91.3498	86.1715	82.4289	70.9004	83.6267	-0.0712777	-0.975663	-0.344013	0.142466	0.144646	0.0188987	no change	no change	no change	no change	no change	no change	2.4364e-06	0	0	NULL
Q9RUA9	leuA	0.866021	1.09012	1.81637	1.54464	4.19317	4.24763	4.31267	6.5165	0.842319	0.698039	1.4241	2.58575	2.29334	3.21407	3.39936	3.65026	0.780883	2.10937	2.46884	1.38028	1.83811	2.19428	no change	up	up	up	up	up	0.00291644	2	3	sustain_up
Q9RUB0	DR_1481	21.4308	34.8182	28.203	25.3331	28.4054	31.5147	22.0637	23.2016	24.1299	36.8389	18.107	23.9718	20.462	13.0575	19.6004	18.4698	-0.0713144	0.0912122	-0.31342	-0.534978	-0.863073	-0.679409	no change	no change	no change	no change	no change	no change	0.0193867	0	0	NULL
Q9RUB1	DR_1480	19.2619	23.7226	31.1377	34.544	35.6527	31.3244	40.3866	43.962	17.2815	17.4674	39.4617	36.1698	30.7649	27.3174	42.7427	35.7285	0.611674	0.639854	0.972548	1.12202	0.741128	1.17519	no change	no change	no change	up	no change	up	0.00310488	0	2	late_up
Q9RUB2	DR_1479	NULL	NULL	NULL	NULL	NULL	NULL	0.0711349	NULL	NULL	NULL	NULL	NULL	NULL	NULL	NULL	NULL	0	0	5.81807	0	0	0	no change	no change	up	no change	no change	no change	0.0615447	NULL	NULL	NULL
Q9RUB3	DR_1478	0.29092	0.379827	0.383982	0.92293	0.355657	0.631857	0.823412	0.984166	0.250706	0.642688	1.25325	0.999357	1.08839	0.573449	0.69638	1	0.962321	0.558033	1.43022	1.33423	0.895411	0.925091	no change	no change	up	up	no change	no change	0.0796194	NULL	NULL	NULL
Q9RUB5	dxs	0.28424	0.402535	0.511005	0.469908	0.573666	0.344312	0.780677	0.89372	0.326838	0.95047	0.405331	0.441115	0.52621	1.80503	1.53293	1.29477	0.514287	0.418622	1.28573	-0.593616	0.86799	1.14652	no change	no change	up	no change	no change	up	0.0874892	NULL	NULL	NULL
Q9RUB6	DR_1474	0.439561	0.287147	0.422485	0.251292	0.399416	0.566277	1.14116	0.605961	0.52535	0.256165	0.370337	0.45711	0.914991	0.721667	0.318671	0.985302	-0.109104	0.41019	1.26553	0.0823918	1.06641	0.738567	no change	no change	up	no change	up	no change	0.0808	NULL	NULL	NULL
Q9RUB7	DR_1473	103.908	99.8709	98.2779	76.1796	118.657	93.1776	61.8846	52.2575	160.288	92.0687	112.394	91.1904	118.674	93.0667	65.4456	60.2672	-0.224131	0.0559331	-0.836176	-0.309836	-0.253169	-1.00534	no change	no change	no change	no change	no change	down	0.527494	NULL	NULL	NULL
Q9RUB8	DR_1472	0.912732	0.924624	0.996119	0.973059	0.799169	0.649446	1.07878	0.768224	0.0570172	0.105039	0.800256	0.790133	0.345578	0.207617	1.25621	0.853382	0.099961	-0.342958	0.0075571	3.29482	1.7713	3.7024	no change	no change	no change	up	up	up	1.86891e-06	0	3	late_up
Q9RUB9	DR_1470	2.12829	4.02087	6.82211	3.05985	3.23912	2.1041	2.95208	3.17869	0.820562	1.56955	3.29611	3.97506	2.92775	2.4978	1.37946	2.51484	0.684407	-0.202682	-0.00432306	1.60511	1.18269	0.704289	no change	no change	no change	up	up	no change	0.266961	NULL	NULL	NULL
Q9RUC0	DR_1469	0.677643	0.394841	2.22813	0.760618	1.61703	0.670779	0.527612	0.701211	0.479348	0.154419	1.1628	0.962954	0.640043	0.452206	1.01702	0.597838	1.47859	1.09301	0.196321	1.74595	0.785278	1.34938	up	up	no change	up	no change	up	0.229932	NULL	NULL	NULL
Q9RUC1	smpB	8.39985	3.81139	9.31883	0.68678	4.40284	2.97687	0.767111	0.107618	8.05588	21.5234	3.39	21.0945	2.77247	4.72227	1.16255	0.95055	-0.287401	-0.726574	-3.80323	-0.272716	-1.98064	-3.80715	no change	no change	down	no change	down	down	0.230808	NULL	NULL	NULL
Q9RUC2	DR_1467	4.08706	4.31387	3.37579	1.03298	1.29949	0.736873	1.51712	1.51645	3.37063	2.13341	1.5745	1.65626	3.68228	2.62324	1.43134	1.38296	-0.930173	-2.04455	-1.46953	-0.768621	0.196122	-0.967721	no change	down	down	no change	no change	no change	0.000136941	0	0	NULL
Q9RUC4	DR_1465	NULL	NULL	NULL	NULL	0.0579055	NULL	NULL	NULL	NULL	0.123123	NULL	0.825494	0.417132	0.326742	NULL	0.321122	0	5.52413	0	2.73884	2.58753	1.37845	no change	up	no change	up	up	up	0.239415	NULL	NULL	NULL
Q9RUC6	DR_1463	1.96684	3.10793	4.95255	0.07236	0.785331	2.36822	7.66688	8.00922	0.39805	0.70671	1.90347	1.73924	1.6933	1.74305	2.63467	2.89045	-0.0142449	-0.686366	1.62715	1.72128	1.63714	2.32227	no change	no change	up	up	up	up	0.00100062	1	3	NULL
Q9RUC7	DR_1462	0.00677466	0.00965201	0.0115444	0.58728	0.0703904	1.21051	0.0980055	0.0626109	0.0219692	0.026565	0.00276424	0.0349747	0.0715181	0.679268	0.0644041	0.984094	5.18802	6.28497	3.28951	-0.362949	3.95133	4.43318	up	up	up	no change	up	up	0.164698	NULL	NULL	NULL
Q9RUC8	DR_1461	NULL	NULL	NULL	NULL	0.00540349	NULL	0.0124991	0.114599	NULL	0.0803414	NULL	0.0172735	0.00148465	0.111905	0.00310271	0.0133455	0	2.24719	6.64254	-2.17679	0.485691	-2.29959	no change	up	up	down	no change	down	0.030224	2	0	early_up
Q9RUC9	DR_1460	NULL	NULL	0.0354117	0.0166772	NULL	NULL	0.096426	0.0621501	NULL	0.00746349	0.0107408	0.00326263	0.0735238	0.0545556	0.0243172	0.0360845	5.35565	0	6.96178	0.789864	3.98305	2.89868	up	no change	up	no change	up	up	2.07846e-08	2	2	sustain_up
Q9RUD0	DR_1459	4.48591	4.37205	3.65056	4.07891	8.42928	8.41338	11.958	9.14751	5.56304	4.95326	5.10826	6.81845	5.98102	7.54556	6.76838	9.29157	-0.196605	0.927074	1.25258	0.181569	0.363171	0.610842	no change	no change	up	no change	no change	no change	0.000374466	1	0	NULL
Q9RUD2	prs	23.2686	23.5085	23.2533	21.088	15.3645	14.2979	7.71223	6.81945	14.1003	16.224	12.7666	7.9142	11.6562	12.3553	11.3961	9.14263	-0.0771513	-0.657167	-1.6866	-0.552178	-0.336744	-0.562125	no change	no change	down	no change	no change	no change	2.39237e-08	0	0	NULL
Q9RUD5	DR_1452	14.2297	23.4147	15.8665	21.3044	12.7008	14.8252	22.8093	23.8806	14.6103	20.6649	14.1526	14.0714	14.4174	16.8606	13.9779	15.1191	-0.0182601	-0.451639	0.310676	-0.321736	-0.173506	-0.27779	no change	no change	no change	no change	no change	no change	0.00557022	0	0	NULL
Q9RUD6	DR_1451	30.8739	29.0444	17.6378	20.6213	4.56957	10.1002	9.88317	9.44213	19.6327	27.4813	15.3616	19.4184	9.09199	12.6219	10.336	14.1274	-0.647195	-2.03014	-1.6325	-0.437898	-1.11754	-0.94553	no change	down	down	no change	down	no change	0.00386142	0	0	NULL
Q9RUD7	DR_1450	0.806114	0.345857	0.305013	NULL	0.780728	0.599141	0.662388	0.546252	0.132235	0.1335	0.988554	0.511267	0.866515	0.400096	0.880684	0.77555	-1.91416	0.260426	0.0692797	2.49673	2.25292	2.63985	down	no change	no change	up	up	up	0.00028707	0	3	late_up
Q9RUD8	DR_1449	0.374041	1.54809	1.13421	1.98285	0.299492	0.240791	0.0304466	1.09064	0.122285	0.358933	0.5376	0.932557	0.27932	0.449049	0.835433	2.56625	0.697482	-1.83092	-0.777804	1.61121	0.597978	2.82149	no change	down	no change	up	no change	up	0.0055502	0	2	late_up
Q9RUD9	DR_1448	31.1354	28.8473	26.6105	22.7943	16.6057	17.6874	16.5217	12.4962	27.3841	29.0612	25.6573	26.7376	17.3893	25.1027	8.84009	13.6414	-0.279895	-0.806627	-1.0476	-0.107425	-0.409659	-1.32811	no change	no change	down	no change	no change	down	0.0219971	0	0	NULL
Q9RUE0	DR_1447	19.2896	20.1414	12.1922	14.7361	6.00022	9.42278	6.73302	9.50488	18.09	16.9696	10.2265	13.3734	9.53687	7.63387	12.6691	13.0147	-0.550205	-1.35425	-1.27996	-0.571032	-1.02986	-0.448953	no change	down	down	no change	down	no change	0.000285669	0	0	NULL
Q9RUE2	hisG	0.0224033	0.0975532	0.393587	0.333095	0.827603	0.7086	0.510933	0.299946	NULL	0.0915473	0.323748	0.212165	0.026359	0.131374	0.180181	0.348858	2.59881	3.67878	2.75698	2.53942	0.774904	2.5208	up	up	up	up	no change	up	2.69795e-07	3	2	sustain_up
Q9RUE3	hisZ	1.83913	2.25685	2.59682	1.66596	1.75373	2.39939	3.42862	2.7445	1.60565	1.74138	3.01757	1.98063	1.95653	2.07169	2.67643	2.09965	0.0575843	0.0199863	0.59179	0.578527	0.267259	0.512943	no change	no change	no change	no change	no change	no change	0.0644776	NULL	NULL	NULL
Q9RUE4	DR_1443	1.06159	0.38277	0.632353	1.51469	1.4992	3.63843	2.79851	2.15604	1.06351	1.26036	1.24405	0.47856	1.62307	6.70556	1.01857	4.32962	0.571922	1.83068	1.77833	-0.431942	1.84155	1.20252	no change	up	up	no change	up	up	0.588032	NULL	NULL	NULL
Q9RUE6	DR_1441	0.812123	0.439761	NULL	0.124225	0.257207	0.0364232	NULL	NULL	0.0277403	NULL	0.453756	0.661437	0.0540904	0.027536	0.0474183	0.0328968	-3.3257	-2.09203	-9.94263	5.29646	1.52434	1.50098	down	down	down	up	up	up	1.0954e-07	0	3	late_up
Q9RUE7	DR_1439	0.101829	0.191225	4.17499	2.16805	0.442979	0.23359	0.790477	1.03873	0.151822	0.0211113	0.366334	0.976988	1.24479	0.815897	1.06491	1.1604	4.43594	1.20707	2.64198	2.95752	3.57484	3.68573	up	up	up	up	up	up	9.74149e-06	3	3	sustain_up
Q9RUE8	DR_1438	23.1709	26.9673	6.52307	5.68693	10.6285	2.64779	7.67188	10.5559	9.94724	13.3221	22.1083	14.6695	9.25381	6.23761	14.9967	18.7837	-2.03785	-1.91706	-1.45977	0.660403	-0.586964	0.537754	down	down	down	no change	no change	no change	3.4878e-07	0	0	NULL
Q9RUF0	DR_1436	0.519724	1.49929	0.632517	NULL	1.18537	0.553866	1.56558	1.63851	0.614492	NULL	0.096138	0.838731	1.18798	0.481258	1.35574	1.21612	-1.67302	-0.215199	0.666268	0.603879	1.44023	2.06386	down	no change	no change	no change	up	up	0.146218	NULL	NULL	NULL
Q9RUF1	DR_1435	0.415675	0.353531	0.0561284	0.116187	0.0989222	0.0945583	0.287018	0.280028	0.0654138	0.0637853	0.124877	0.134628	0.2207	0.171587	0.26002	0.291887	-2.15832	-1.99118	-0.439902	1.00617	1.60231	2.09483	down	down	no change	up	up	up	5.4723e-12	0	3	late_up
Q9RUF2	DR_1434	1.69835	1.02841	1.52832	1.82407	0.856457	1.04447	1.28527	1.57326	1.29963	1.24508	1.72826	1.48037	1.43232	1.58372	1.28097	1.43348	0.298003	-0.520486	0.0680883	0.334455	0.245153	0.0931589	no change	no change	no change	no change	no change	no change	0.00486179	0	0	NULL
Q9RUF3	metG	9.58384	11.2336	7.58474	7.27641	10.3029	14.0897	9.5373	6.35865	10.3437	7.56062	6.22844	7.25724	5.43541	3.74864	6.47731	3.58494	-0.486247	0.228651	-0.389134	-0.40888	-0.963105	-0.831355	no change	no change	no change	no change	no change	no change	0.000673465	0	0	NULL
Q9RUF4	DR_1432	6.20623	4.05974	23.4277	27.6459	15.1812	14.0857	9.69832	16.1096	3.06683	3.32671	12.1599	15.59	6.37181	3.74756	17.3122	21.9042	2.31471	1.5114	1.32994	2.1178	0.662432	2.61677	up	up	up	up	no change	up	5.49379e-07	3	2	sustain_up
Q9RUF5	purD	0.0817778	0.0188296	0.558878	0.0895179	1.4754	1.63237	0.890012	0.316143	0.0374323	0.0355533	0.636291	0.520472	0.589764	1.09139	0.97837	0.963648	2.68814	4.94907	3.58361	3.98634	4.5257	4.7338	up	up	up	up	up	up	0.000124704	3	3	sustain_up
Q9RUF6	DR_1430	3.95005	2.61537	1.53116	2.81568	1.47863	1.61074	1.74486	1.81739	2.51098	2.78434	1.8051	2.01593	2.31249	1.90641	2.76479	1.42499	-0.594921	-1.08758	-0.882098	-0.470756	-0.327851	-0.337843	no change	down	no change	no change	no change	no change	0.0902982	NULL	NULL	NULL
Q9RUF7	DR_1429	NULL	20.4241	NULL	9.64372	4.5008	7.0456	13.6405	25.062	7.84935	11.1509	13.8172	13.2294	0.70709	15.5806	0.487656	11.2134	-1.08256	-0.822875	0.92211	0.509422	-0.222237	-0.699386	down	no change	no change	no change	no change	no change	0.0225146	0	0	NULL
Q9RUF8	DR_1428	1.11142	0.371461	0.622185	1.08053	3.40416	3.66821	2.22805	2.70572	1.24496	1.20944	1.01173	1.85862	6.09416	6.31793	2.24125	3.16537	0.199435	2.25379	1.73429	0.225851	2.3383	1.13935	no change	up	up	no change	up	up	5.13984e-06	2	2	sustain_up
Q9RUF9	DR_1427	5.19065	6.52742	4.98825	0.981008	4.04693	4.8109	7.88978	4.74464	3.20125	5.21244	8.06419	8.3867	7.68796	4.32505	7.11262	6.23151	-0.973112	-0.40371	0.108625	0.967356	0.513787	0.665394	no change	no change	no change	no change	no change	no change	0.000978627	0	0	NULL
Q9RUG0	trpC	0.906901	1.04003	0.956265	0.405992	2.42038	2.5398	2.41812	2.87568	0.808954	1.31957	0.975747	0.978643	2.37875	3.52214	2.47202	5.25231	-0.515205	1.34919	1.4431	-0.123137	1.47108	1.85955	no change	up	up	no change	up	up	0.351773	NULL	NULL	NULL
Q9RUG1	DR_1425	2.33664	2.93985	2.15012	1.20456	3.32501	2.21168	1.88459	2.83509	0.0840913	2.59058	0.746668	0.493936	0.730078	1.38039	3.59867	2.79159	-0.653402	0.069445	-0.160889	-1.10832	-0.341795	1.25651	no change	no change	no change	down	no change	up	0.00774755	0	1	NULL
Q9RUG2	dnaJ	0.478662	1.10528	2.16182	1.36032	1.11317	1.14948	1.32332	1.55552	1.86267	0.710767	2.58562	2.39228	0.976404	0.640425	0.513849	1.11232	1.15293	0.514496	0.861964	0.951842	-0.670529	-0.662216	up	no change	no change	no change	no change	no change	0.00351735	1	0	NULL
Q9RUG3	DR_1423	7.66766	10.1278	8.03357	6.23607	5.35268	5.66461	4.37531	4.26467	11.5416	13.9649	5.48765	8.78382	5.29658	10.6258	10.6824	9.17431	-0.318559	-0.691738	-1.04241	-0.837734	-0.679812	-0.361242	no change	no change	down	no change	no change	no change	0.0149817	0	0	NULL
Q9RUG4	DR_1422	30.1635	33.7362	25.4729	18.1715	8.19968	7.74804	21.6614	29.6132	36.6409	43.6989	32.3428	12.0123	18.1862	25.0356	15.2975	19.0182	-0.550011	-2.00246	-0.317564	-0.857015	-0.894355	-1.22725	no change	down	no change	no change	no change	down	0.00358943	0	0	NULL
Q9RUG6	lysZ	NULL	NULL	0.00947245	0.0104733	0.0121835	0.242454	0.0405826	0.18095	0.0148259	0.0286484	0.0656541	0.0814769	0.0942283	0.122478	0.294807	0.115073	3.97075	7.64505	7.44412	1.75887	2.31751	3.23697	up	up	up	up	up	up	0.376021	NULL	NULL	NULL
Q9RUG8	DR_1418	1.17009	NULL	0.0603433	NULL	0.425857	0.27343	0.25966	0.340708	NULL	NULL	NULL	NULL	1.2059	0.816976	0.123807	0.266535	-4.26294	-0.743444	-0.963484	0	10.6349	8.26134	down	no change	no change	no change	up	up	0.00170584	0	2	late_up
Q9RUG9	DR_1417	1.03449	0.870727	1.3595	1.1802	0.967188	0.871484	0.97183	0.882004	0.635043	0.516816	0.602793	0.73749	0.70878	0.659607	0.554293	0.528824	0.414704	-0.05129	-0.0394417	0.218574	0.248512	-0.0887756	no change	no change	no change	no change	no change	no change	0.000678136	0	0	NULL
Q9RUH0	DR_1416	NULL	NULL	NULL	NULL	NULL	0.195744	0.404981	NULL	NULL	NULL	0.0829711	0.105991	NULL	0.180387	NULL	0.190979	0	7.27025	8.31672	7.21469	7.15277	7.23481	no change	up	up	up	up	up	0.343793	NULL	NULL	NULL
Q9RUH1	DR_1415	3.92283	1.45762	2.64646	2.59544	5.04814	4.30344	3.88494	1.96505	1.80614	1.12652	2.55849	3.27434	2.69291	1.87972	1.84395	2.69674	-0.0376406	0.797482	0.120705	0.991984	0.640813	0.630701	no change	no change	no change	no change	no change	no change	0.014691	0	0	NULL
Q9RUH2	DR_1414	1.05204	0.512832	2.08692	2.18815	3.5445	2.05835	2.03167	1.25359	1.48224	1.23001	2.85589	2.02243	2.7319	2.14678	2.92258	1.83539	1.4499	1.84011	1.06996	0.846894	0.847002	0.810857	up	up	up	no change	no change	no change	0.142655	NULL	NULL	NULL
Q9RUH3	lysK	0.745619	1.58098	1.16898	0.947884	0.23295	0.449952	0.0905384	0.109373	0.716195	0.958326	0.651859	0.531717	0.432863	0.516184	0.277669	0.382271	-0.136295	-1.76847	-3.54079	-0.500596	-0.819196	-1.34334	no change	down	down	no change	no change	down	0.00500968	0	0	NULL
Q9RUH5	DR_1411	0.517987	0.787399	0.6411	0.590887	0.742274	0.844863	2.51535	1.97897	0.786141	0.864979	0.629407	0.576473	0.250811	0.471587	0.656689	1.02407	-0.083489	0.281951	1.78363	-0.453358	-1.19258	0.0256693	no change	no change	up	no change	down	no change	8.03258e-08	1	0	NULL
Q9RUH6	DR_1410	6.28457	11.1187	8.90007	6.9671	5.58565	4.13858	11.4596	11.0344	8.2619	6.91612	6.62104	8.11031	5.88998	8.76519	3.94363	6.19231	-0.133318	-0.839706	0.370176	-0.0430929	-0.0505741	-0.582503	no change	no change	no change	no change	no change	no change	0.000135604	0	0	NULL
Q9RUH7	DR_1409	0.321409	0.288486	0.22137	0.0191999	0.366015	0.429316	0.341501	0.348988	0.153867	0.129786	0.660864	0.280778	0.136214	0.214122	0.165251	0.281465	-1.34211	0.382993	0.179056	1.73105	0.304616	0.655232	down	no change	no change	up	no change	no change	4.88111e-05	0	1	NULL
Q9RUH9	DR_1407	0.0789621	0.0946374	0.184551	0.259691	1.15216	0.555188	1.96695	1.52135	0.366454	0.593601	1.04222	1.76112	0.956369	1.16428	0.789163	1.08038	1.35558	3.29792	4.32869	1.54596	1.14332	0.961498	up	up	up	up	up	no change	2.42316e-06	3	2	sustain_up
Q9RUI0	DR_1406	NULL	NULL	NULL	0.125116	3.26578	4.82962	1.31071	0.950929	0.394442	0.624005	0.540041	0.596335	2.51758	3.0575	1.43393	1.41461	6.62718	12.6356	10.7959	0.158069	2.45262	1.48385	up	up	up	no change	up	up	0.000238111	3	2	sustain_up
Q9RUI1	DR_1405	NULL	NULL	NULL	NULL	0.213672	0.202306	NULL	NULL	NULL	NULL	NULL	NULL	NULL	0.0513387	NULL	0.0254238	0	8.35311	0	0	5.35248	4.3565	no change	up	no change	no change	up	up	2.18804e-11	1	2	NULL
Q9RUI2	DR_1404	NULL	0.225984	0.428001	0.460773	3.14817	1.34152	0.209592	0.386323	0.339847	NULL	1.18298	0.871886	0.51084	NULL	0.755735	0.242212	1.97154	4.30827	1.39483	2.59338	0.587083	1.55138	up	up	up	up	no change	up	4.98865e-05	3	2	sustain_up
Q9RUI3	DR_1403	0.0455783	NULL	NULL	NULL	NULL	0.0524932	NULL	NULL	NULL	NULL	0.0613599	NULL	0.0242315	0.0121375	0.10126	0.0684881	-5.18301	0.201166	-5.18301	5.60685	4.83738	7.05999	down	no change	down	up	up	up	0.000297463	0	3	late_up
Q9RUI4	DR_1402	1.64969	2.45443	0.518024	1.40824	2.34741	0.658185	1.14019	0.812148	2.82845	2.34346	1.48381	1.76976	1.21254	0.875639	1.33375	1.02404	-1.09126	-0.449425	-1.07187	-0.668676	-1.30845	-1.13327	down	no change	down	no change	down	down	0.100853	NULL	NULL	NULL
Q9RUI5	rpe	2.00925	2.20635	1.28034	4.45315	1.42558	0.233146	0.995542	1.33208	2.34506	3.10538	3.18682	4.32346	0.725345	0.215721	1.98718	1.008	0.443676	-1.34566	-0.856883	0.462493	-2.53401	-0.863728	no change	down	no change	no change	down	no change	0.445852	NULL	NULL	NULL
Q9RUI6	comB	0.271287	0.41012	0.556582	0.858226	0.507986	1.14482	1.36782	1.18712	0.0559771	0.140742	0.189118	0.481115	0.190584	0.602302	0.0518122	1.04903	1.05402	1.27833	1.9067	1.76853	2.01098	2.48439	up	up	up	up	up	up	0.37109	NULL	NULL	NULL
Q9RUI7	DR_1399	1.75814	0.752532	0.100454	0.802944	3.42998	2.1884	0.394335	0.221011	2.32978	2.21726	1.81759	2.42525	3.91463	2.57469	1.15634	1.4328	-1.47464	1.16208	-2.0286	-0.099901	0.513138	-0.812458	down	up	down	no change	no change	no change	0.116762	NULL	NULL	NULL
Q9RUI8	DR_1398	0.0629517	0.115537	0.0682047	NULL	0.218534	0.161555	0.156158	0.242723	0.0374619	0.0631361	0.0709729	0.0808764	0.17196	0.212276	0.0779866	0.0667015	-1.3745	1.0905	1.16012	0.594038	1.93339	0.524344	down	up	up	no change	up	no change	0.000211433	2	1	NULL
Q9RUI9	DR_1397	2.84193	1.12839	1.17374	3.69621	1.9787	2.8156	4.62088	3.49179	9.74122	7.8863	4.93136	1.16078	4.36717	1.40121	5.1987	1.78251	0.294651	0.272064	1.03092	-1.53281	-1.61159	-1.33628	no change	no change	up	down	down	down	0.000360483	1	0	NULL
Q9RUJ1	DR_1395	4.24711	4.22708	2.33468	3.03121	1.48326	1.57869	4.38761	5.12182	2.6968	3.12667	2.39657	2.51295	0.871248	2.02933	2.31821	2.2547	-0.659256	-1.46863	0.166284	-0.246298	-1.00554	-0.348767	no change	down	no change	no change	down	no change	4.84257e-06	0	0	NULL
Q9RUJ2	purM	0.281342	0.305689	0.930789	1.14244	1.54824	3.04021	0.013981	0.793911	0.19093	0.0796486	1.21907	1.66588	0.577639	0.963755	1.69823	1.26155	1.82037	2.9665	0.460727	3.41443	2.51012	3.45137	up	up	no change	up	up	up	3.06935e-05	2	3	sustain_up
Q9RUJ3	DR_1393	0.912025	4.21464	0.992128	2.99131	1.44637	1.62249	2.26421	2.68905	4.12341	3.80295	3.61796	3.04054	2.13513	2.85985	2.10465	1.77065	-0.364005	-0.740314	-0.0496415	-0.251461	-0.666178	-1.03235	no change	no change	no change	no change	no change	down	0.102123	NULL	NULL	NULL
Q9RUJ4	DR_1392	4.31797	5.92646	12.1796	6.13581	4.96028	6.15848	4.72003	8.80435	3.67157	3.79816	4.06932	4.37647	4.9511	4.99401	3.4972	5.74419	0.838222	0.118157	0.400724	0.177173	0.412928	0.307052	no change	no change	no change	no change	no change	no change	0.0767743	NULL	NULL	NULL
Q9RUJ5	DR_1391	0.118876	NULL	NULL	9.64446	11.2715	0.961592	0.180093	0.179249	4.78795	0.201593	6.61584	3.54092	7.66046	2.12036	5.78326	4.44524	6.33457	6.67749	1.5882	1.02546	0.971049	1.03562	up	up	up	up	no change	up	0.303065	NULL	NULL	NULL
Q9RUJ6	DR_1390	12.1185	8.19547	8.71693	7.23894	3.48865	3.22457	1.42262	1.00059	10.8557	10.4332	5.10345	3.31227	4.23781	3.918	0.872915	2.70513	-0.348387	-1.5974	-3.06748	-1.33894	-1.3842	-2.57286	no change	down	down	down	down	down	0.000859621	0	0	NULL
Q9RUJ8	DR_1388	0.0988425	NULL	NULL	NULL	0.735903	0.691232	0.138304	0.217065	0.111638	0.0668243	0.10313	0.228399	0.643491	0.90589	0.0297016	0.349577	-6.28906	3.84259	1.83686	0.893517	3.118	1.08764	down	up	up	no change	up	up	0.403641	NULL	NULL	NULL
Q9RUJ9	DR_1387	NULL	NULL	NULL	NULL	0.0342746	0.0237743	0.0205768	0.0480175	0.0324536	NULL	NULL	0.00736449	0.0226404	0.0102885	0.934406	NULL	0	5.51194	5.75276	-2.04821	-0.00702737	4.82058	no change	up	up	down	no change	up	0.0910789	NULL	NULL	NULL
Q9RUK0	ychF	0.0739434	0.034008	0.506784	0.913066	0.674629	3.71227	0.654356	0.993137	0.0128541	0.00874692	0.416296	0.954803	0.213984	0.116061	0.300002	1.63726	3.71728	5.34475	3.93182	5.98809	3.93349	6.48677	up	up	up	up	up	up	0.019462	3	3	sustain_up
Q9RUK1	DR_1385	0.160922	0.0797186	NULL	0.0447295	NULL	0.105677	0.416932	0.723467	0.152741	0.057316	0.473806	1.24167	0.275421	0.0563059	0.252907	0.538002	-2.40721	-1.17857	2.24458	3.02976	0.659217	1.91273	down	down	up	up	no change	up	0.00030761	1	2	NULL
Q9RUK2	DR_1384	14.6343	4.92191	5.62924	4.58064	5.70017	3.42469	3.5486	3.42105	6.46601	3.8683	2.86785	3.01976	2.74182	2.42068	3.57682	2.30989	-0.937664	-1.09976	-1.48847	-0.811686	-1.0013	-0.811907	no change	down	down	no change	down	no change	0.323357	NULL	NULL	NULL
Q9RUK3	DR_1383	0.461532	0.0364365	NULL	NULL	1.94395	2.86429	0.211502	0.37217	5.66504	2.70728	1.10193	0.351996	7.43757	10.6821	5.70704	10.4697	-8.61265	3.27138	0.229104	-2.52567	1.11386	0.950218	down	up	no change	down	up	no change	0.000375987	1	1	NULL
Q9RUK4	DR_1380	NULL	0.179127	0.122551	NULL	0.102759	0.146824	0.184635	0.270386	NULL	NULL	NULL	NULL	0.174847	NULL	0.172027	NULL	-0.54525	0.47342	1.33983	0	7.10793	7.08456	no change	no change	up	no change	up	up	0.493997	NULL	NULL	NULL
Q9RUK5	DR_1379	NULL	0.429715	0.731358	0.878616	0.1788	0.187795	NULL	0.336036	0.246626	0.470907	0.375051	0.476985	0.176467	0.161465	0.130335	0.145096	1.90345	-0.23133	-0.35417	0.24787	-1.08631	-1.38135	up	no change	no change	no change	down	down	0.00553687	1	0	NULL
Q9RUK6	msrB	1.47145	0.623653	0.456544	1.16842	4.10307	0.570427	0.162915	0.0922888	1.04558	0.384852	0.549326	1.36455	2.9433	0.889106	2.14947	1.36989	-0.366609	1.15748	-3.0373	0.420049	1.4218	1.29887	no change	up	down	no change	up	up	0.126814	NULL	NULL	NULL
Q9RUK7	DR_1377	2.35043	1.80786	0.391822	0.601089	0.517417	0.900419	0.776296	0.202667	1.26632	1.48556	0.835394	0.885491	0.866312	0.910166	0.92205	1.47944	-2.06625	-1.5523	-2.08666	-0.677263	-0.631394	-0.196485	down	down	down	no change	no change	no change	7.06872e-05	0	0	NULL
Q9RUK8	DR_1376	7.72303	10.0979	7.43822	5.91851	14.512	11.8488	11.7359	12.1526	9.94422	6.98318	8.50642	11.7383	12.7319	16.5641	8.82019	9.10867	-0.416003	0.564825	0.422744	0.258186	0.791343	0.0829224	no change	no change	no change	no change	no change	no change	0.0026107	0	0	NULL
Q9RUK9	DR_1375	4.85459	4.44505	4.15296	4.2519	3.0286	3.1775	3.04727	3.92353	6.84187	6.60672	3.64209	2.94255	5.12395	3.17819	3.56905	2.7697	-0.145952	-0.583488	-0.415852	-1.03028	-0.695899	-1.08518	no change	no change	no change	down	no change	down	7.54658e-05	0	0	NULL
Q9RUL0	topA	2.30413	1.9531	1.08255	1.12698	1.55508	1.18011	0.799585	0.527134	2.55213	2.00686	0.90475	0.860855	1.23506	0.967751	1.00823	0.886599	-0.946176	-0.638273	-1.68205	-1.36855	-1.04937	-1.26665	no change	no change	down	down	down	down	0.0131532	0	0	NULL
Q9RUL1	DR_1373	NULL	0.0356182	0.0752132	0.00593147	0.582227	0.289862	NULL	0.0305417	0.147058	0.137607	0.14939	0.298214	0.479582	0.215685	0.470468	0.361433	1.16235	4.58825	-0.217632	0.652957	1.2883	1.54715	up	up	no change	no change	up	up	0.000631284	2	2	sustain_up
Q9RUL2	DR_1372	0.719288	0.981513	0.427121	0.301892	1.02274	0.966255	1.25745	1.49576	0.784684	1.30529	1.04682	1.05445	0.870481	2.41688	0.763188	1.4863	-1.2222	0.225822	0.694898	0.00778081	0.653446	0.106111	down	no change	no change	no change	no change	no change	0.0727284	NULL	NULL	NULL
Q9RUL3	DR_1371	0.0672636	0.037594	0.0478581	0.052131	0.137362	0.176511	0.185727	0.295162	NULL	NULL	0.101537	0.133507	0.145777	0.0985094	0.298279	0.169308	-0.0685877	1.58175	2.19727	7.52953	7.58517	8.52183	no change	up	up	up	up	up	0.0294784	2	3	sustain_up
Q9RUL5	DR_1369	NULL	NULL	NULL	NULL	0.0506863	0.180473	0.0905576	0.117922	NULL	NULL	0.0756874	0.0299972	0.00653024	NULL	0.114995	0.156965	0	7.50549	7.35651	6.37637	2.49398	7.74	no change	up	up	up	up	up	0.000236903	2	3	sustain_up
Q9RUL6	DR_1368	2.11598	1.88819	0.468396	0.689452	2.32517	0.47907	2.55547	2.13158	1.51832	1.94151	0.770601	0.809928	0.260682	0.533288	0.949336	0.780677	-1.79006	-0.513894	0.227174	-1.13029	-2.12354	-0.999915	down	no change	no change	down	down	no change	0.00355286	0	0	NULL
Q9RUL7	pdxS	12.588	2.01801	2.28575	2.27177	14.9844	4.11251	2.42481	2.331	7.80112	2.11699	3.84192	1.11304	4.31669	2.5199	2.75678	2.06291	-1.68024	0.386779	-1.6188	-1.00119	-0.536788	-1.04113	down	no change	down	down	no change	down	0.245398	NULL	NULL	NULL
Q9RUL8	pdxT	0.939652	1.32284	NULL	0.191667	0.0688888	0.0359433	1.99885	1.96353	0.281076	NULL	NULL	0.214929	0.874132	NULL	NULL	NULL	-3.55646	-4.43176	0.80845	-0.386101	1.63468	-7.79082	down	down	no change	no change	up	down	2.16502e-08	0	1	NULL
Q9RUL9	DR_1365	3.37243	3.67553	4.38623	5.41347	3.65958	3.62011	2.82779	4.02981	2.26044	3.28601	2.33341	3.47952	2.82926	3.79672	3.66082	2.61116	0.475534	0.0466732	-0.0395006	0.0677022	0.25657	0.177358	no change	no change	no change	no change	no change	no change	0.0202131	0	0	NULL
Q9RUM0	DR_1364	2.67694	2.24183	1.40761	2.55745	0.0368176	0.238478	0.340087	1.46434	0.290307	0.99775	0.279073	2.07863	0.0333837	0.407489	0.180276	0.776268	-0.310952	-4.15924	-1.44676	0.872184	-1.54676	-0.429294	no change	down	down	no change	down	no change	0.0194543	0	0	NULL
Q9RUM1	DR_1363	0.902483	1.50139	1.48272	1.75966	0.323434	1.07792	1.44772	2.42487	0.917391	1.01932	1.59863	0.751095	1.10536	1.43858	1.38812	0.988993	0.431693	-0.778543	0.687936	0.278885	0.393455	0.295605	no change	no change	no change	no change	no change	no change	0.0109199	0	0	NULL
Q9RUM2	DR_1362	1.45183	1.91552	0.975727	1.8781	0.88548	1.239	1.96241	2.08667	1.35315	2.22662	1.14307	1.46377	0.602407	1.33584	0.713811	1.92854	-0.238714	-0.664501	0.265984	-0.457563	-0.885115	-0.438046	no change	no change	no change	no change	no change	no change	0.26823	NULL	NULL	NULL
Q9RUM3	DR_1361	2.95997	3.7458	4.06845	3.24439	0.89929	0.911398	1.92641	2.30433	2.04487	3.04282	2.19706	1.01817	2.07647	1.77186	1.57556	1.13911	0.125026	-1.88887	-0.664496	-0.662087	-0.402779	-0.906236	no change	down	no change	no change	no change	no change	1.81218e-05	0	0	NULL
Q9RUM4	DR_1360	0.0803935	0.0266248	0.22301	0.258947	1.07205	0.614269	0.931209	0.207368	0.0216919	0.42939	0.508825	0.428791	0.523709	0.16694	0.891486	1.15469	2.17105	3.97795	3.4113	1.05561	0.614563	2.18147	up	up	up	up	no change	up	0.00269359	3	2	sustain_up
Q9RUM5	DR_1359	0.0704091	0.132434	0.19169	NULL	0.0373116	NULL	0.0496945	NULL	0.117703	0.177924	0.0359311	0.205417	0.0328856	NULL	0.02218	NULL	-0.0768065	-2.41828	-2.01086	-0.292657	-3.14061	-3.69565	no change	down	down	no change	down	down	0.720352	NULL	NULL	NULL
Q9RUM9	DR_1355	0.657379	0.716509	0.330702	0.165558	0.703792	0.754131	1.02363	1.08947	0.564193	0.25333	0.859127	0.857117	0.904241	0.705083	0.603064	0.677891	-1.4691	0.0856495	0.621096	1.06992	0.977124	0.647889	down	no change	no change	up	no change	no change	1.04933e-08	0	1	NULL
Q9RUN0	uvrC	0.748741	0.786583	0.432145	0.695524	1.87709	1.20221	1.36989	1.59905	0.884579	0.810842	0.632089	0.460487	2.12264	1.98186	1.42886	0.798217	-0.445199	1.00406	0.951406	-0.63391	1.27556	0.393508	no change	up	no change	no change	up	no change	0.00551797	1	1	NULL
Q9RUN1	lnt	0.609313	0.379957	0.0768806	0.171336	0.470935	0.467651	0.206276	0.442311	0.554244	0.332957	0.506103	0.26034	0.425539	0.37291	0.319399	0.373845	-1.99476	-0.0758749	-0.609064	-0.211081	-0.152061	-0.355898	down	no change	no change	no change	no change	no change	0.0150649	0	0	NULL
Q9RUN2	DR_1352	0.284211	0.725073	0.337382	0.0920206	0.0325512	0.355401	0.347439	0.172033	0.748455	1.29772	0.394741	0.855462	0.0365613	0.33736	0.212048	0.512722	-1.23293	-1.37938	-0.958215	-0.710766	-2.45212	-1.49733	down	down	no change	no change	down	down	0.0778772	NULL	NULL	NULL
Q9RUN3	DR_1351	0.0507437	0.0265167	NULL	0.0238358	0.0784686	0.0452045	0.146766	0.114153	NULL	0.0038498	0.0979509	0.0413329	0.0972392	0.0403732	0.0596461	NULL	-1.6586	0.678731	1.7558	4.9565	4.93908	3.74827	down	no change	up	up	up	up	4.11931e-05	1	3	NULL
Q9RUN4	DR_1350	1.79136	1.82879	1.51022	1.82517	0.226682	0.389733	0.521579	0.598853	0.596653	1.07874	0.918518	1.14975	0.627265	1.40633	0.820091	1.14737	-0.11819	-2.55407	-1.69199	0.30392	0.279531	0.231833	no change	down	down	no change	no change	no change	1.37627e-06	0	0	NULL
Q9RUN5	hisS	2.11958	1.99728	3.30461	0.233773	3.24782	4.87369	1.58999	1.77489	3.15321	0.994536	2.15152	1.90421	1.05071	1.59922	1.59076	1.08675	-0.218452	0.980203	-0.290991	-0.0323647	-0.646372	-0.631438	no change	no change	no change	no change	no change	no change	0.010352	0	0	NULL
Q9RUN6	DR_1348	3.07826	2.30538	0.270058	1.93912	1.11609	1.19854	5.70616	4.47777	2.52284	1.54133	1.32065	0.08019	3.16326	1.80854	3.50861	13.9341	-1.28507	-1.2178	0.919643	-1.53667	0.290806	2.10159	down	down	no change	down	no change	up	0.230114	NULL	NULL	NULL
Q9RUN7	aspS1	12.052	12.2837	12.857	11.0386	10.3335	8.96673	10.6967	9.16565	11.8979	7.97629	6.9272	8	6.65713	6.37628	8.11473	8.21864	-0.0263243	-0.334456	-0.293032	-0.412952	-0.608682	-0.283074	no change	no change	no change	no change	no change	no change	0.0706113	NULL	NULL	NULL
Q9RUN8	DR_1346	0.235661	0.0508312	1.77318	3.04792	1.50639	2.27697	2.73195	2.68484	4.45485	3.67811	2.3004	2.77604	2.45898	3.42132	1.56995	1.67204	4.07279	3.7231	4.24087	-0.679965	-0.467891	-1.3269	up	up	up	no change	no change	down	1.2981e-08	3	0	early_up
Q9RUN9	DR_1345	2.68053	3.1587	3.60229	2.9205	2.05485	2.72141	4.08824	3.81999	2.56992	3.44006	2.70048	1.37337	1.76043	3.59299	1.01794	1.9708	0.15971	-0.289897	0.437576	-0.560965	-0.166898	-1.00782	no change	no change	no change	no change	no change	down	0.000655268	0	0	NULL
Q9RUP0	DR_1344	1.95612	1.29253	0.331981	0.315664	1.37699	1.5065	0.840014	1.12319	4.26175	3.84766	2.6096	2.20659	1.69895	1.50496	1.51698	1.47052	-2.32656	-0.172023	-0.726627	-0.751705	-1.33976	-1.44066	down	no change	no change	no change	down	down	2.83683e-09	0	0	NULL
Q9RUP1	DR_1343	238.783	197.159	151.104	176.695	96.8732	135.915	123.124	181.95	259.932	267.35	133.597	210.437	124.087	67.9388	145.61	158.049	-0.411324	-0.905121	-0.514978	-0.616022	-1.45727	-0.796121	no change	no change	no change	no change	down	no change	0.126326	NULL	NULL	NULL
Q9RUP2	pgk	1.35152	0.872902	2.58752	2.41943	10.8665	8.03261	7.56927	7.03956	1.08698	0.688291	4.56677	4.20892	8.15402	4.73665	10.611	8.26208	1.17051	3.08682	2.71534	2.30547	2.86022	3.41022	up	up	up	up	up	up	0.000474185	3	3	sustain_up
Q9RUP4	DR_1340	0.567679	NULL	0.918052	NULL	0.156393	0.217427	0.0426886	0.0372504	NULL	NULL	0.36238	0.118082	0.427792	0.0753676	1.27437	1.06549	0.692884	-0.604349	-2.82972	8.56102	8.62762	10.8449	no change	no change	down	up	up	up	7.05271e-05	0	3	late_up
Q9RUP5	tpiA	36.2743	60.7191	6.03433	6.1219	16.826	14.7283	5.76996	4.25423	41.6879	47.8706	24.1133	28.334	23.2128	36.2012	16.0527	8.95646	-2.99619	-1.62005	-3.2744	-0.77196	-0.592024	-1.84037	down	down	down	no change	no change	down	0.00766081	0	0	NULL
Q9RUP6	tal	47.6488	37.3248	28.3539	29.258	37.2976	27.1312	21.5926	36.6028	28.1966	31.3174	22.9199	30.8583	30.0144	29.4517	28.7427	37.538	-0.560647	-0.399311	-0.546112	-0.146206	-0.00115876	0.155362	no change	no change	no change	no change	no change	no change	0.0272926	0	0	NULL
Q9RUP8	ileS	18.4184	17.9807	15.7561	11.0975	13.9257	11.5811	11.5956	12.431	15.6801	16.1347	15.4897	13.4622	10.3288	9.7954	10.0151	10.8531	-0.438787	-0.513022	-0.599268	-0.136041	-0.660767	-0.608395	no change	no change	no change	no change	no change	no change	0.0251579	0	0	NULL
Q9RUP9	DR_1333	1.53559	3.554	1.33031	3.62679	1.3739	1.67698	1.44307	1.9222	1.44626	1.66954	0.190719	1.33734	1.49921	1.18478	0.0381473	0.952412	-0.0380532	-0.738322	-0.596829	-1.0279	-0.215219	-1.65328	no change	no change	no change	down	no change	down	0.22432	NULL	NULL	NULL
Q9RUQ0	DR_1332	0.538804	1.13988	0.560081	1.28252	0.336234	0.249728	0.386111	0.140522	0.288197	0.27602	0.0763397	0.605405	0.21759	0.128409	0.252106	0.137623	0.134414	-1.51845	-1.67246	0.272982	-0.705484	-0.533779	no change	down	down	no change	no change	no change	0.0673013	NULL	NULL	NULL
Q9RUQ1	DR_1331	0.186193	0.155196	3.60305	3.56297	7.34639	8.56319	3.48968	4.42605	NULL	NULL	3.11578	1.99497	0.852677	NULL	5.74321	6.36542	4.39169	5.54234	4.53524	11.9721	9.38968	13.2165	up	up	up	up	up	up	2.0963e-12	3	3	sustain_up
Q9RUQ2	DR_1330	0.510364	0.815197	1.07566	0.933603	1.36107	0.54252	1.95677	0.882053	0.769208	0.304553	0.618602	0.615168	0.992383	0.789202	0.526594	0.671228	0.600064	0.522123	1.09869	0.2004	0.730489	0.157742	no change	no change	up	no change	no change	no change	0.0902039	NULL	NULL	NULL
Q9RUQ3	DR_1329	5.20897	4.21804	3.72698	3.0625	3.21357	2.39531	4.33919	4.81377	4.93503	5.05796	3.69076	2.36366	3.16393	1.06182	2.2271	1.7973	-0.473498	-0.749084	-0.042562	-0.722928	-1.24171	-1.31214	no change	no change	no change	no change	down	down	0.00152978	0	0	NULL
Q9RUQ4	DR_1328	0.146455	0.155026	NULL	NULL	0.18841	0.136153	NULL	NULL	NULL	NULL	NULL	NULL	0.185232	NULL	NULL	0.111556	-7.88867	0.106432	-7.88867	0	7.19088	6.46257	down	no change	down	no change	up	up	0.0020917	0	2	late_up
Q9RUQ5	DR_1327	0.651371	0.834296	0.243604	0.213714	0.205339	0.467871	0.923293	0.933134	0.372263	0.452116	0.26559	0.436188	0.243464	0.423553	0.492292	0.366038	-1.69984	-1.14198	0.321417	-0.232292	-0.305582	0.0582269	down	down	no change	no change	no change	no change	8.26437e-06	0	0	NULL
Q9RUQ6	DR_1326	0.0968928	0.0696255	0.101175	0.180442	0.105072	0.11851	0.298244	0.191308	0.113085	0.109388	0.0651579	0.0589416	0.135619	0.181781	0.10025	0.0573472	0.758054	0.425123	1.55578	-0.842133	0.512675	-0.497388	no change	no change	up	no change	no change	no change	8.97997e-06	1	0	NULL
Q9RUQ8	DR_1324	0.141566	0.194087	0.115876	NULL	0.133323	0.10224	0.0582568	0.0722928	0.132446	0.172831	0.151819	0.160251	0.0489227	0.0414322	0.122227	0.118019	-1.52649	-0.510859	-1.36237	0.0317513	-1.75644	-0.345604	down	no change	down	no change	down	no change	8.32251e-05	0	0	NULL
Q9RUQ9	truB	NULL	NULL	0.0971846	NULL	0.225599	NULL	0.0524	NULL	NULL	NULL	0.141093	NULL	0.56006	0.34164	0.132056	NULL	6.26481	7.47442	5.38165	6.79974	9.46925	6.70469	up	up	up	up	up	up	0.00148145	3	3	sustain_up
Q9RUR1	DR_1321	0.273696	0.0893292	0.169899	0.265594	0.0877677	0.279415	0.407632	0.16092	0.376644	0.192444	0.25689	0.18675	0.31317	0.0711957	0.246037	0.0652481	0.262583	0.0164303	0.647223	-0.359262	-0.566171	-0.870416	no change	no change	no change	no change	no change	no change	0.226945	NULL	NULL	NULL
Q9RUR2	DR_1320	14.8794	14.3023	11.3798	12.2194	7.31384	3.73577	0.482418	0.88774	15.0384	16.8253	5.5797	9.31393	3.70008	3.85098	0.970068	1.19875	-0.306327	-1.40107	-4.41265	-1.09722	-2.07717	-3.87694	no change	down	down	down	down	down	0.000643106	0	0	NULL
Q9RUR4	DR_1318	15.5998	17.7177	27.7252	25.9014	29.6011	28.8907	53.6912	69.876	10.8577	12.9522	39.7523	30.9784	39.7413	38.3624	41.7789	45.5891	0.68667	0.811958	1.89095	1.57077	1.71383	1.87554	no change	no change	up	up	up	up	5.74461e-06	1	3	NULL
Q9RUR5	DR_1317	NULL	NULL	NULL	NULL	0.497628	0.369832	0.521271	0.573214	NULL	0.0507781	NULL	0.173433	0.133645	0.131925	0.361299	0.448836	0	9.4134	9.74878	1.75942	2.36886	3.97792	no change	up	up	up	up	up	2.95717e-06	2	3	sustain_up
Q9RUR6	DR_1316	6.35467	7.40705	3.54488	3.99764	5.48376	6.06962	7.02202	8.17491	6.68459	4.96597	4.92976	4.17435	4.25381	5.36525	6.39113	4.37273	-0.867541	-0.252346	0.143119	-0.355808	-0.276431	-0.114202	no change	no change	no change	no change	no change	no change	0.00534186	0	0	NULL
Q9RUR7	DR_1315	0.222661	0.141066	1.74661	1.18579	21.1707	20.0646	4.09362	2.10447	0.0362349	0.0607049	2.59043	8.76727	1.21919	1.89846	15.0783	17.0487	3.01116	6.82488	4.0909	6.87237	5.00723	8.37248	up	up	up	up	up	up	1.38126e-12	3	3	sustain_up
Q9RUR8	DR_1314	123.559	93.5703	283.813	224.542	240.663	296.427	170.704	206.711	179.212	229.44	226.842	230.299	125.356	205.359	230.602	240.301	1.22728	1.30661	0.797599	0.161766	-0.305284	0.204559	up	up	no change	no change	no change	no change	1.06802e-05	2	0	early_up
Q9RUR9	DR_1313	2.42359	3.35295	0.75913	0.269135	0.717574	0.472755	0.258856	0.829796	1.27627	2.08742	0.646136	0.934089	0.89739	0.439098	1.1745	1.09586	-2.48999	-2.27885	-2.40766	-1.08991	-1.3316	-0.567124	down	down	down	down	down	no change	0.000207382	0	0	NULL
Q9RUS1	map	11.7751	10.5036	5.82331	6.4081	1.34788	1.02717	0.350678	0.78195	15.2811	13.3936	5.50526	2.40012	3.0055	2.05958	4.22329	3.56142	-0.865077	-3.22964	-4.29792	-1.85887	-2.50112	-1.88106	no change	down	down	down	down	down	1.74806e-05	0	0	NULL
Q9RUS2	recX	NULL	NULL	0.0469386	0.00822672	0.239591	0.33738	NULL	NULL	NULL	NULL	NULL	0.080907	0.138887	0.0886949	0.0662346	0.095558	5.43843	8.8251	0	6.00223	7.48299	6.99075	up	up	no change	up	up	up	1.60372e-06	2	3	sustain_up
Q9RUS3	rpsT	124.178	83.3413	134.009	80.3975	7.82665	4.06918	85.7807	52.4879	136.27	90.326	124.973	190.005	90.6833	49.952	50.2173	0.691348	0.0471093	-4.12471	-0.585769	0.475129	-0.68816	-2.15414	no change	down	no change	no change	no change	down	0.00320189	0	0	NULL
Q9RUS4	DR_1308	NULL	NULL	NULL	NULL	NULL	NULL	NULL	0.00429938	0.0460962	0.024216	NULL	NULL	0.0450239	0.0819493	0.0213427	0.0204014	0	0	1.95592	-5.78845	0.852678	-0.752201	no change	no change	up	down	no change	no change	2.10084e-05	1	0	NULL
Q9RUS5	DR_1307	0.660501	NULL	0.882845	0.583452	0.219525	0.331655	1.19242	0.117418	0.163122	0.261265	0.110009	0.174959	0.40769	0.396599	0.449834	0.371166	1.14916	-0.262427	0.986368	-0.574579	0.922332	0.952001	up	no change	no change	no change	no change	no change	0.0965109	NULL	NULL	NULL
Q9RUS6	DR_1306	13.5511	21.1466	20.632	18.5307	19.3766	27.8244	23.4122	33.6453	20.4839	20.8928	14.5812	20.5087	18.3402	20.1263	16.6939	20.812	0.174641	0.443978	0.717577	-0.237764	-0.105216	-0.141702	no change	no change	no change	no change	no change	no change	0.0139614	0	0	NULL
Q9RUS7	DR_1305	1.55067	1.0399	0.81347	1.12735	1.23578	1.17449	2.28961	1.26585	0.777549	0.979395	1.0014	0.345065	1.2962	0.699089	2.18586	1.40909	-0.416606	-0.104078	0.456766	-0.383891	0.18353	1.0329	no change	no change	no change	no change	no change	up	0.639516	NULL	NULL	NULL
Q9RUS8	DR_1304	0.222296	0.212159	NULL	NULL	NULL	0.446941	NULL	0.0283283	0.116748	0.103746	0.140553	0.169303	0.254485	0.207505	0.348433	0.181768	-8.41581	0.0429309	-3.90685	0.490859	1.06712	1.2658	down	no change	down	no change	up	up	0.0108102	0	2	late_up
Q9RUS9	DR_1303	1.10211	NULL	NULL	NULL	1.53257	NULL	1.28262	1.70263	1.06763	NULL	NULL	NULL	0.692531	NULL	1.11781	1.00402	-9.75963	0.475452	1.43675	-9.71381	-0.624002	0.990031	down	no change	up	down	no change	no change	0.674552	NULL	NULL	NULL
Q9RUT0	potA	0.0581463	0.0506525	0.0260857	NULL	0.144071	0.142172	0.00388148	0.227403	0.0564946	0.0237889	0.0325445	0.0368629	0.130179	0.262968	0.0956764	0.078169	-2.02557	1.39557	1.08801	-0.210015	2.29189	1.11463	down	up	up	no change	up	up	0.445555	NULL	NULL	NULL
Q9RUT1	DR_1301	0.659559	0.778767	1.04062	1.83651	1.54139	1.53532	1.663	1.63724	0.41007	0.469314	0.968103	0.794362	0.402641	1.05679	1.55553	1.67926	1.00024	1.097	1.19818	1.00303	0.730837	1.87911	up	up	up	up	no change	up	0.0140152	3	2	sustain_up
Q9RUT4	DR_1298	0.222731	0.917216	0.474448	0.209672	0.25129	0.137751	0.164221	0.106687	0.418647	0.182923	0.272626	0.209946	0.204314	0.126986	0.267011	0.183421	-0.736645	-1.55098	-2.07309	-0.317989	-0.860597	-0.417423	no change	down	down	no change	no change	no change	0.209618	NULL	NULL	NULL
Q9RUT5	DR_1297	NULL	NULL	0.111305	NULL	NULL	NULL	0.0576265	NULL	0.116803	0.00385094	NULL	NULL	0.269968	0.0033515	NULL	0.000692916	6.45935	0	5.51724	-6.56748	1.17971	-6.50441	up	no change	up	down	up	down	0.0351534	2	1	NULL
Q9RUT7	rpsP	23.5785	34.9276	2.17773	0.593574	4.45617	10.94	0.278429	0.0465033	74.3731	70.6439	6.79994	10.4894	22.2196	23.3708	4.40123	1.28063	-4.39995	-1.92602	-7.4923	-3.06827	-1.66942	-4.67371	down	down	down	down	down	down	1.22919e-09	0	0	NULL
Q9RUT8	DR_1293	NULL	NULL	0.665045	0.743541	NULL	0.184031	NULL	0.755625	NULL	NULL	NULL	NULL	0.156826	NULL	NULL	0.36323	10.1128	7.18153	9.21549	0	6.95161	8.16001	up	up	up	no change	up	up	0.00363404	3	2	sustain_up
Q9RUT9	DR_1292	0.317951	0.22542	0.562705	0.424689	0.680523	1.46012	0.899504	0.757733	0.861163	0.430725	1.19382	0.534524	0.490467	0.577885	1.28476	0.894601	0.861688	1.97804	1.60877	0.41991	-0.274094	0.754422	no change	up	up	no change	no change	no change	0.00456992	2	0	early_up
Q9RUU0	DR_1291	4.04677	4.1222	5.82112	0.655826	13.5874	6.96152	9.96926	4.47728	4.3933	2.92326	4.44351	7.83882	18.2895	9.02933	7.02522	9.69527	-0.33484	1.33084	0.822496	0.747348	1.90066	1.19238	no change	up	no change	no change	up	up	0.563791	NULL	NULL	NULL
Q9RUU1	DR_1290	14.5407	7.29899	11.7396	10.2672	9.88941	9.7415	8.47354	9.53772	8.44078	13.1243	18.107	16.2709	5.29501	4.95045	9.06562	8.08864	0.0109956	-0.153824	-0.278052	0.672783	-1.07371	-0.330131	no change	no change	no change	no change	down	no change	0.000257263	0	0	NULL
Q9RUU2	DR_1289	0.165346	0.102834	0.166701	0.271145	0.619278	0.315429	0.379297	0.385798	0.226431	0.37616	0.291728	0.379697	0.330028	0.773018	0.235783	0.259588	0.707219	1.80131	1.51244	0.156047	0.872243	-0.28267	no change	up	up	no change	no change	no change	0.0921689	NULL	NULL	NULL
Q9RUU8	ppc	5.86175	6.7598	3.99437	3.95039	3.27589	2.71488	3.51958	5.90617	5.82684	6.66029	3.48413	3.62819	4.28716	3.49504	3.37048	2.90776	-0.667815	-1.07508	-0.42121	-0.812049	-0.68219	-0.99201	no change	down	no change	no change	no change	no change	0.00629068	0	0	NULL
Q9RUU9	DR_1282	NULL	0.0444505	NULL	NULL	NULL	NULL	0.0316041	NULL	NULL	0.0732707	NULL	NULL	NULL	0.0561581	NULL	NULL	-5.14737	-5.14737	-0.483838	-5.86038	-0.379964	-5.86038	down	down	no change	down	no change	down	0.258219	NULL	NULL	NULL
Q9RUV0	DR_1281	3.82535	2.3747	2.50279	1.82996	1.60682	1.85107	2.28957	2.51483	3.8487	1.97657	2.48945	1.29413	2.76075	1.03964	1.54366	1.87755	-0.516998	-0.84239	-0.367923	-0.622572	-0.616178	-0.767819	no change	no change	no change	no change	no change	no change	0.645963	NULL	NULL	NULL
Q9RUV2	sodA	1.23394	29.2116	1.37322	21.035	0.546159	2.54509	0.0252869	0.709937	0.61208	5.85844	0.736703	5.18664	0.199538	1.07872	1.13735	4.89957	-0.442204	-3.29997	-5.3719	-0.127471	-2.3397	-0.10007	no change	down	down	no change	down	no change	0.200049	NULL	NULL	NULL
Q9RUV3	DR_1278	0.620446	NULL	NULL	0.038134	1.19539	0.618124	0.420045	0.0191	0.921863	0.014507	0.960139	NULL	0.51661	0.0177901	0.589396	0.800274	-4.00177	1.54593	-0.500085	0.03712	-0.80916	0.569592	down	up	no change	no change	no change	no change	0.0179197	1	0	NULL
Q9RUV4	DR_1277	5.01858	3.64127	4.14301	3.57946	2.1349	2.49031	1.28439	3.14074	5.6962	6.24462	5.64534	3.95373	3.26647	6.06178	2.11924	1.1295	-0.165279	-0.904826	-0.968624	-0.314935	-0.356222	-1.87795	no change	no change	no change	no change	no change	down	0.0214873	0	0	NULL
Q9RUV5	serS	11.5937	10.2719	8.88093	8.22378	7.08058	5.77293	9.67987	6.78514	14.039	8.58479	9.40089	7.24376	8.74538	4.19357	7.04003	6.37489	-0.354266	-0.766496	-0.409256	-0.442782	-0.806119	-0.754002	no change	no change	no change	no change	no change	no change	0.693731	NULL	NULL	NULL
Q9RUV6	gatC	0.122357	NULL	0.854035	0.0372779	1.75061	1.36605	0.183117	0.160233	0.0226958	NULL	0.11997	0.634533	0.277698	0.0460758	2.46037	0.283888	2.85735	4.66335	1.4811	5.01515	3.79461	6.87797	up	up	up	up	up	up	0.000915439	3	3	sustain_up
Q9RUV7	ruvA	0.440491	0.37876	0.264345	0.680493	0.960732	1.0163	1.77195	0.31302	0.558816	0.418105	1.49062	0.981339	1.17642	0.705603	2.69002	1.10853	0.205761	1.27096	1.34765	1.33934	0.945968	1.95914	no change	up	up	up	no change	up	0.164	NULL	NULL	NULL
Q9RUV8	DR_1273	0.172774	0.242588	0.0609939	0.301759	0.510792	0.0295175	0.514085	0.276322	NULL	0.0402535	0.828311	NULL	0.0283467	0.00797115	0.113473	0.0279724	-0.195382	0.379417	0.928226	4.34147	-0.171056	1.79044	no change	no change	no change	up	no change	up	0.0685675	NULL	NULL	NULL
Q9RUW0	DR_1271	2.50193	3.09182	1.54647	1.11329	1.23645	1.2079	9.05192	10.4069	2.90759	2.62143	2.14103	3.52787	11.2332	10.3397	7.22064	4.50469	-1.07252	-1.19436	1.79853	0.036044	1.96412	1.08453	down	down	up	no change	up	up	3.07122e-11	1	2	NULL
Q9RUW2	DR_1268	0.0594469	0.110338	NULL	NULL	0.108058	0.100679	0.0701587	NULL	NULL	0.097661	0.0187385	0.0568813	0.00237447	0.12062	0.0563008	NULL	-7.06031	0.297986	-1.26199	-0.378384	0.323376	-0.787784	down	no change	down	no change	no change	no change	0.192065	NULL	NULL	NULL
Q9RUW4	proS	4.72312	2.20839	7.94828	10.1031	8.93648	7.18918	15.8291	17.5303	5.36757	6.25097	8.24109	4.97068	9.08005	7.58832	9.78273	3.8557	1.38087	1.21812	2.26685	0.185394	0.520684	0.231249	up	up	up	no change	no change	no change	9.2045e-06	3	0	early_up
Q9RUW7	DR_1263	0.0148099	0.0358696	NULL	NULL	0.0225728	NULL	0.0897006	0.0358895	0.00378765	0.195393	0.131765	0.0673571	0.0113747	0.438979	0.0731823	NULL	-5.31608	-1.12673	1.30925	-0.000429945	1.17698	-1.43203	down	down	up	no change	up	down	0.156237	NULL	NULL	NULL
Q9RUW8	rsr	2.4409	2.63039	2.22813	2.24115	0.761164	0.51869	1.10622	1.02059	3.17818	2.71378	2.03278	2.09376	0.635198	0.335126	0.687495	0.642225	-0.182312	-1.98638	-1.25366	-0.513815	-2.60221	-2.14763	no change	down	down	no change	down	down	0.000107159	0	0	NULL
Q9RUW9	DR_1261	1.23011	49.4957	2.57659	0.490578	3.82968	2.96413	0.09525	0.733173	0.746244	0.693754	1.49826	0.836096	0.651244	1.85218	0.633239	70.5196	-4.04774	-2.90043	-5.93621	0.696957	0.797837	5.62678	down	down	down	no change	no change	up	0.0253365	0	1	NULL
Q9RUX0	DR_1260	0.491444	0.0185883	0.220375	0.104262	0.0257903	0.0463061	0.583721	0.736605	0.0285659	0.674121	0.13441	0.40679	0.671752	0.0606138	0.472775	0.452265	-0.651761	-2.82259	1.37223	-0.376719	0.0596841	0.396634	no change	down	up	no change	no change	no change	0.154771	NULL	NULL	NULL
Q9RUX1	DR_1259	0.317822	0.184633	0.291608	0.226522	0.0699919	0.166935	0.0843357	0.18871	0.225195	0.138171	0.12599	0.15286	0.300257	0.12968	0.110956	0.125221	0.0443223	-1.08455	-0.879849	-0.381933	0.242701	-0.621553	no change	down	no change	no change	no change	no change	0.0110594	0	0	NULL
Q9RUX2	DR_1258	0.971402	1.38728	1.38574	0.284063	0.754231	0.346541	1.09185	1.30423	1.63685	1.40678	1.2701	1.07878	0.553795	0.830123	0.599908	0.493451	-0.498298	-1.09946	0.0226972	-0.37382	-1.13703	-1.47703	no change	down	no change	no change	down	down	0.00598061	0	0	NULL
Q9RUX3	DR_1257	0.376603	1.08503	0.331298	0.296437	0.307295	0.337328	1.08824	0.283014	0.400548	0.356133	0.324285	0.259776	0.183334	0.574169	0.188284	0.171653	-1.21935	-1.18105	-0.092086	-0.373566	0.00156619	-1.07194	down	down	no change	no change	no change	down	0.0871836	NULL	NULL	NULL
Q9RUX5	DR_1255	1.12344	1.272	2.29024	2.15046	4.62627	4.56892	7.36251	3.75342	0.680669	0.835053	2.44791	3.21189	3.9419	4.45972	3.93708	3.91123	0.890495	1.94059	2.21427	1.90075	2.47066	2.37237	no change	up	up	up	up	up	0.0673517	NULL	NULL	NULL
Q9RUX6	DR_1254	2.20587	0.22909	0.780068	0.547582	3.50829	3.58607	1.30956	1.51645	0.29899	0.385166	0.492296	0.252055	0.62393	0.441896	0.303959	1.3065	-0.875025	1.54277	0.214864	0.121657	0.639574	1.23507	no change	up	no change	no change	no change	up	8.59674e-05	1	1	NULL
Q9RUX7	DR_1253	0.106147	NULL	NULL	NULL	NULL	0.00633546	0.0041724	NULL	0.0894226	0.140542	NULL	NULL	NULL	NULL	NULL	NULL	-6.39128	-3.93706	-4.47296	-7.49801	-7.49801	-7.49801	down	down	down	down	down	down	0.0414321	0	0	NULL
Q9RUX8	DR_1252	2.31614	0.939034	0.911546	0.304564	1.48424	1.74223	2.59959	2.35448	0.773981	1.48977	0.771121	1.06487	1.82424	1.91996	1.34122	1.06483	-1.42046	-0.0127776	0.605879	-0.302157	0.72594	0.0879556	down	no change	no change	no change	no change	no change	0.00118548	0	0	NULL
Q9RUX9	DR_1251	0.654257	0.415367	0.510037	NULL	0.457237	0.310292	0.429768	0.139482	0.657806	0.783559	1.29371	0.462877	0.464392	0.272494	0.567329	0.291168	-1.06663	-0.47881	-0.909969	0.285342	-0.967922	-0.74755	down	no change	no change	no change	no change	no change	0.0682873	NULL	NULL	NULL
Q9RUY1	DR_1249	0.84882	0.434955	NULL	NULL	NULL	0.325821	NULL	NULL	1.35762	1.03789	0.668668	0.650651	0.320968	0.116616	0.788144	0.69285	-9.97892	-1.97543	-9.97892	-0.860539	-2.4527	-0.693766	down	down	down	no change	down	no change	0.000454553	0	0	NULL
Q9RUY2	sucD	0.687009	0.349888	0.244905	0.162974	11.88	10.0661	0.328627	0.107442	1.89674	1.82295	2.66443	3.31062	13.884	10.0516	3.29473	2.95071	-1.34606	4.40362	-1.24965	0.683768	2.6859	0.747624	down	up	down	no change	up	no change	0.0999033	NULL	NULL	NULL
Q9RUY3	sucC	1.86876	2.21335	5.61885	4.27545	14.041	22.7517	9.29749	12.8305	1.66338	1.95822	9.10794	10.9061	3.65613	4.24433	9.85264	15.6652	1.27728	3.17203	2.43849	2.46631	1.12531	2.8168	up	up	up	up	up	up	1.40975e-06	3	3	sustain_up
Q9RUY4	DR_1246	9.28048	9.26528	3.24727	2.66316	1.42984	2.61027	3.17766	2.9547	10.3618	9.00475	4.21419	3.59626	4.56121	3.38159	1.95574	1.61087	-1.64976	-2.19862	-1.59657	-1.31009	-1.28585	-2.44094	down	down	down	down	down	down	4.60371e-05	0	0	NULL
Q9RUY5	DR_1245	260.177	220.934	137.847	126.728	144.371	120.427	199.812	167.68	327.37	201.028	158.422	183.184	172.758	157.88	150.533	130.346	-0.862693	-0.861481	-0.38866	-0.629294	-0.676375	-0.91168	no change	no change	no change	no change	no change	no change	0.0441315	0	0	NULL
Q9RUY6	DR_1244	1.72615	1.50384	0.789471	0.0388163	0.149754	0.00436256	2.39022	0.838374	NULL	0.13085	1.44583	0.942179	1.28331	1.19058	1.72726	0.0138671	-1.96333	-4.38943	-0.000622454	4.18282	4.23379	3.72704	down	down	no change	up	up	up	0.000185758	0	3	late_up
Q9RUY7	DR_1243	NULL	0.0558309	0.0440307	NULL	0.230174	0.137776	NULL	0.0180979	NULL	NULL	0.00771201	0.0584416	0.0172282	0.0130187	0.0600976	0.020502	-0.338204	2.70403	-1.59175	5.70049	4.57146	5.98544	no change	up	down	up	up	up	6.75617e-06	1	3	NULL
Q9RUY8	DR_1242	6.42241	7.19228	6.90356	8.08612	6.65198	3.77176	4.84647	3.25702	7.27803	8.15056	7.52471	5.68721	4.54656	3.5008	5.59998	5.60734	0.138807	-0.385292	-0.748548	-0.223765	-0.939018	-0.461164	no change	no change	no change	no change	no change	no change	0.0144846	0	0	NULL
Q9RUZ0	DR_1240	0.0229812	NULL	0.147103	0.0885167	1.44376	1.92142	1.1671	1.14648	0.196578	NULL	0.0962821	0.267651	0.850627	2.38323	0.508363	1.13042	3.31854	7.1547	6.61414	0.883911	4.03542	3.05479	up	up	up	no change	up	up	0.624087	NULL	NULL	NULL
Q9RUZ1	DR_1239	24.8367	16.026	6.77564	6.57218	15.9264	15.1153	15.225	16.7719	24.7937	21.7777	17.5455	14.1259	36.8791	18.9826	16.772	15.7324	-1.61418	-0.396575	-0.35285	-0.556261	0.262415	-0.518806	down	no change	no change	no change	no change	no change	0.0383407	0	0	NULL
Q9RUZ2	DR_1238	0.499496	0.20486	0.319604	0.0901583	0.567884	0.599838	0.397487	0.481627	0.401141	0.10631	0.555569	0.38482	0.366943	0.354851	0.451727	0.105092	-0.781517	0.729321	0.319744	0.88999	0.50832	0.133941	no change	no change	no change	no change	no change	no change	0.00612111	0	0	NULL
Q9RUZ3	DR_1237	0.0503461	0.115218	NULL	0.118064	0.0227168	0.0134391	0.0635909	0.0840777	NULL	0.0652402	0.0369828	0.0351672	0.0402033	NULL	NULL	0.0524708	-0.480067	-2.19509	-0.165025	0.131241	-0.689798	-0.310858	no change	down	no change	no change	no change	no change	0.391876	NULL	NULL	NULL
Q9RUZ4	DR_1236	0.315919	0.211459	0.280877	0.198888	0.446038	0.217599	0.701549	0.0362881	0.352877	0.220391	0.125953	0.290155	0.136782	0.037464	0.134377	0.153826	-0.136509	0.331557	0.484463	-0.462249	-1.71808	-0.99212	no change	no change	no change	no change	down	no change	0.24165	NULL	NULL	NULL
Q9RUZ5	DR_1235	0.498648	0.240753	0.884376	0.988149	1.01252	1.37108	0.986472	0.744154	0.773378	0.445795	0.606555	0.712058	0.846345	0.629715	1.06013	0.522879	1.34056	1.68871	1.22687	0.113118	0.275848	0.376768	up	up	up	no change	no change	no change	0.00645675	3	0	early_up
Q9RUZ6	DR_1234	0.276924	0.0513974	0.00930297	NULL	0.132874	0.120173	0.0336601	0.0994215	0.083242	0.0550998	0.23447	0.0134126	0.077443	0.113099	0.0804821	0.0533462	-5.04586	-0.375702	-1.3028	0.841419	0.461874	-0.0478545	down	no change	down	no change	no change	no change	0.0368216	0	0	NULL
Q9RUZ8	DR_1232	0.605896	0.0768708	31.6641	0.0335797	NULL	0.308442	NULL	0.0984313	NULL	0.156662	NULL	0.039484	0.161746	0.0902254	14.8151	0.142839	5.53684	-1.14342	-2.78491	-1.9711	0.679762	6.57127	up	down	down	down	no change	up	0.0318974	1	1	NULL
Q9RUZ9	DR_1231	0.536377	0.548535	0.365045	0.456415	0.236071	0.345102	0.0327213	0.11957	0.0820059	0.161576	0.0669828	0.292575	0.245966	0.21421	0.208555	0.133632	-0.401316	-0.900539	-2.83268	0.561821	0.917782	0.490378	no change	no change	down	no change	no change	no change	2.30318e-06	0	0	NULL
Q9RV00	DR_1230	4.76635	3.11792	2.50918	2.61715	3.62759	3.16215	1.10246	1.72729	4.05899	3.54448	1.6623	2.90302	1.69167	1.45316	1.80591	2.22468	-0.62105	-0.215623	-1.47831	-0.735941	-1.27367	-0.915666	no change	no change	down	no change	down	no change	0.000878002	0	0	NULL
Q9RV01	DR_1229	NULL	0.0462931	NULL	0.0152801	NULL	0.0103257	0.0311863	0.105216	0.0409608	0.0205399	NULL	0.0393902	NULL	0.0658848	0.0553516	0.0387105	-1.55999	-2.098	1.53931	-0.619655	0.113203	0.613012	down	down	up	no change	no change	no change	0.276933	NULL	NULL	NULL
Q9RV03	DR_1227	0.0242211	0.105431	0.120025	0.16597	0.210282	0.135151	0.309761	0.312349	0.452811	0.0909331	0.147349	0.0581223	0.109808	0.119066	0.0592212	0.115158	1.14135	1.41376	2.26253	-1.404	-1.24838	-1.6407	up	up	up	down	down	down	0.000700191	3	0	early_up
Q9RV04	DR_1226	0.0246594	0.196439	0.0313908	0.0847479	0.0780868	0.0916061	0.20749	0.238423	0.0140832	0.119287	0.0139008	0.0679332	0.0377873	0.102769	0.134469	0.121553	-0.928837	-0.381759	1.01208	-0.704666	0.0757132	0.940834	no change	no change	up	no change	no change	no change	0.312543	NULL	NULL	NULL
Q9RV05	DR_1225	0.097582	NULL	0.0138263	0.205918	0.177262	0.0865169	NULL	0.132075	0.138772	0.0860051	0.0280262	0.243352	0.0198783	0.0104404	0.0057755	0.0325989	1.16177	1.42527	0.43423	0.271812	-2.89022	-2.55028	up	up	no change	no change	down	down	0.0953383	NULL	NULL	NULL
Q9RV06	DR_1224	0.0985774	0.203126	0.431773	0.195657	0.650209	0.349927	0.123147	0.101181	0.379589	0.358226	7.57674	0.352174	0.22841	0.429787	1.22186	5.10795	1.05632	1.72899	-0.427523	3.42579	-0.164739	3.10083	up	up	no change	up	no change	up	0.081439	NULL	NULL	NULL
Q9RV07	DR_1223	0.0997261	0.0389914	0.0529543	0.423636	0.61605	0.352038	0.875408	0.824746	0.0161163	0.0569189	0.0542922	0.0536001	1.13948	0.282233	1.14888	0.0360094	1.7806	2.80299	3.61544	0.562929	4.28289	4.02002	up	up	up	no change	up	up	0.415985	NULL	NULL	NULL
Q9RV08	DR_1222	0.217395	0.188554	NULL	0.0470232	0.104474	0.0846919	0.0170105	0.0142527	0.0485061	0.0344906	0.167483	0.066064	0.215568	0.0640705	0.170121	0.132319	-3.09047	-1.10165	-3.69876	1.49259	1.75244	1.86552	down	down	down	up	up	up	6.83686e-06	0	3	late_up
Q9RV09	DR_1221	0.0141007	NULL	0.0420271	0.0476658	0.0767732	0.0551149	0.0981938	0.0782391	0.0251068	NULL	0.0954857	0.101118	0.230866	0.120608	0.084978	0.0186089	2.60558	3.16183	3.58163	2.93305	3.77118	2.0086	up	up	up	up	up	up	0.000479735	3	3	sustain_up
Q9RV11	DR_1219	0.338285	0.318208	0.271359	0.557144	0.79799	0.951568	1.50905	1.06922	0.0940857	0.0445945	0.59663	0.0608353	0.348418	0.350092	0.993591	0.670053	0.335726	1.41414	1.97355	2.24515	2.33252	3.58451	no change	up	up	up	up	up	0.0767409	NULL	NULL	NULL
Q9RV13	DR_1217	0.0336648	0.0825053	0.0715613	0.0365513	0.303646	0.200084	0.0929365	0.115427	NULL	0.0488019	0.0855405	0.0868209	0.0807311	0.0941296	0.283956	0.0613156	-0.103702	2.11641	0.842866	1.80174	1.82251	2.80404	no change	up	no change	up	up	up	0.00230571	1	3	NULL
Q9RV14	DR_1216	0.997379	0.677714	0.84157	0.381811	1.41657	0.972644	3.3129	0.831217	0.530124	0.65748	1.03414	0.527103	1.28223	0.602102	0.941009	0.968155	-0.453367	0.512293	1.30682	0.394639	0.665998	0.684888	no change	no change	up	no change	no change	no change	0.170623	NULL	NULL	NULL
Q9RV15	accD	0.407563	0.243832	0.253428	0.451071	4.26895	1.52199	0.507014	0.101103	0.188121	0.179709	0.610317	0.569505	0.365681	0.316892	1.21887	0.982689	0.113064	3.15219	-0.0991856	1.68146	0.891942	2.58141	no change	up	no change	up	no change	up	0.000126423	1	2	NULL
Q9RV16	accA	0.166742	0.228152	0.661983	0.569113	2.21919	2.35235	0.738096	1.12407	0.26969	0.303689	0.800376	0.747786	1.28948	1.07257	2.46814	1.72492	1.64041	3.53314	2.23745	1.433	2.04248	2.87044	up	up	up	up	up	up	1.5792e-08	3	3	sustain_up
Q9RV17	DR_1213	0.37321	0.185781	0.269539	0.369349	0.419064	0.45983	0.117763	0.151326	0.219306	0.338414	0.313407	0.325405	0.193293	0.0931905	0.260651	0.230614	0.192735	0.652863	-1.05474	0.195853	-0.961087	-0.183038	no change	no change	down	no change	no change	no change	1.15883e-05	0	0	NULL
Q9RV18	DR_1212	2.51448	2.61925	5.73693	5.9428	4.44719	0.970662	2.17032	0.59297	0.854279	2.28326	1.26738	5.35015	1.14329	2.20372	1.9942	4.22118	1.18593	0.0777148	-0.893617	1.07666	0.093243	0.986212	up	no change	no change	up	no change	no change	0.0304637	1	1	NULL
Q9RV19	DR_1211	0.174818	0.193033	0.405915	0.164034	0.127406	NULL	0.267288	0.0111697	0.0931109	0.509717	0.0816945	0.0705684	0.084675	0.215645	0.116386	0.102685	0.631709	-1.5225	-0.401666	-1.98518	-1.00525	-1.46035	no change	down	no change	down	down	down	0.0536969	NULL	NULL	NULL
Q9RV21	DR_1209	1.34998	0.597329	0.908485	0.677689	0.691554	0.704267	0.247896	0.608853	0.773981	1.0876	0.386417	0.490866	1.16317	0.982377	0.649868	0.587549	-0.295934	-0.480371	-1.18454	-1.08541	0.204816	-0.589195	no change	no change	down	down	no change	no change	0.00989937	0	0	NULL
Q9RV23	tilS	0.135652	0.206865	0.139941	0.115893	0.119696	0.333308	0.35984	0.592676	0.222537	0.0243195	0.280918	0.00771442	0.439782	0.284763	0.203989	0.284398	-0.42097	0.403347	1.47557	0.225563	1.5534	0.984352	no change	no change	up	no change	up	no change	0.0175537	1	1	NULL
Q9RV24	DR_1206	0.995965	1.64297	0.0955281	0.129555	0.692059	0.38496	2.7977	2.71136	8.04532	8.33768	3.22844	2.71647	4.13549	5.46555	4.44614	2.34236	-3.55143	-1.29291	1.06185	-1.46247	-0.770937	-1.27103	down	down	up	down	no change	down	4.12255e-08	1	0	NULL
Q9RV25	deoC	16.0145	16.3536	10.234	10.4004	9.72689	10.9451	7.43707	7.22879	20.0925	21.7705	17.1637	13.3115	10.0642	9.49289	13.9315	10.8858	-0.649518	-0.64689	-1.14211	-0.458039	-1.09798	-0.75433	no change	no change	down	no change	down	no change	0.000187046	0	0	NULL
Q9RV26	DR_1204	NULL	0.120451	0.988246	0.43417	NULL	NULL	0.141578	0.132051	1.60057	1.19116	0.663305	0.829845	0.950757	0.911205	0.222907	0.117124	3.55422	-6.57265	1.17617	-0.902801	-0.584336	-3.03742	up	down	up	no change	no change	down	1.40127e-07	2	0	early_up
Q9RV27	DR_1203	9.19447	5.90593	4.86152	1.45881	7.15665	5.42594	3.54095	3.73543	7.07804	8.58765	4.52795	3.08252	7.18065	6.71795	5.73107	4.28977	-1.25651	-0.263159	-1.0533	-1.04155	-0.172668	-0.644604	down	no change	down	down	no change	no change	0.816804	NULL	NULL	NULL
Q9RV29	DR_1201	0.549495	1.43064	0.00550459	0.0160604	0.327561	0.18691	0.0521886	0.0624442	0.4859	0.583088	0.421779	0.634962	0.108611	0.0605459	0.0771685	0.329	-6.52077	-1.94444	-4.11051	-0.0166224	-2.65981	-1.39609	down	down	down	no change	down	down	0.000910301	0	0	NULL
Q9RV30	DR_1200	0.856301	0.491402	NULL	0.0212057	1.05094	0.961886	0.0266796	0.0315231	7.48153	9.34186	0.535879	0.592603	3.02443	1.74397	0.407302	0.293638	-5.94727	0.578722	-4.53327	-3.89801	-1.81889	-4.58503	down	no change	down	down	down	down	5.46064e-11	0	0	NULL
Q9RV31	DR_1199	7.53512	13.291	9.71682	8.53294	15.1862	35.651	8.77099	13.3879	10.9592	15.0841	21.7597	29.8256	30.366	14.8018	18.741	18.2216	-0.190515	1.28749	0.0894946	0.986047	0.794379	0.505152	no change	up	no change	no change	no change	no change	0.024346	1	0	NULL
Q9RV32	bipA	5.98474	6.2092	10.4007	11.0305	7.17181	4.84211	6.02398	5.17869	4.1623	2.28768	6.94001	7.37613	6.66975	7.15074	4.14415	4.06865	0.813552	-0.0214585	-0.122323	1.15027	1.09944	0.348579	no change	no change	no change	up	up	no change	2.48172e-05	0	2	late_up
Q9RV36	DR_1194	9.06901	14.4247	6.63077	7.89915	5.13066	3.57593	1.44464	1.48988	1.84619	10.5903	3.66911	1.95581	4.1249	2.2341	1.35103	1.99144	-0.693245	-1.43209	-3.00108	-1.14467	-0.967708	-1.89559	no change	down	down	down	no change	down	0.0610856	NULL	NULL	NULL
Q9RV37	DR_1193	NULL	NULL	NULL	NULL	NULL	NULL	NULL	0.0530957	NULL	NULL	NULL	NULL	NULL	NULL	NULL	0.102998	0	0	5.40045	0	0	6.3481	no change	no change	up	no change	no change	up	0.643091	NULL	NULL	NULL
Q9RV38	DR_1192	0.186199	0.165425	0.859829	0.0518093	0.300025	0.185746	0.51151	1.57817	0.347048	0.103839	0.348161	0.243052	0.556725	0.226674	1.1292	0.796126	1.37443	0.466244	2.57117	0.390913	0.796983	2.09426	up	no change	up	no change	no change	up	0.732943	NULL	NULL	NULL
Q9RV39	DR_1191	NULL	0.0711276	0.027922	NULL	NULL	0.0440626	0.0818108	0.134458	0.0889604	0.211185	NULL	0.0768316	0.0455512	0.0424033	0.0501881	0.0978999	-1.32935	-0.683022	1.5915	-1.95399	-1.77083	-1.0192	down	no change	up	down	down	down	0.00913488	1	0	NULL
Q9RV41	DR_1189	2.57373	1.80915	1.41313	1.4371	1.06071	0.868326	0.364675	1.77798	2.97799	2.87091	1.59103	1.49147	0.758316	1.08328	0.712378	1.01225	-0.620801	-1.184	-1.03248	-0.924067	-1.66721	-1.76188	no change	down	down	no change	down	down	0.0695134	NULL	NULL	NULL
Q9RV42	DR_1188	0.0705917	0.338714	NULL	0.234597	0.188548	0.0807593	0.0583106	0.0414246	0.320391	0.271092	0.639292	0.04781	0.188328	0.0592351	0.156672	0.123957	-0.799088	-0.603925	-2.037	0.216188	-1.25654	-1.07567	no change	no change	down	no change	down	down	0.467552	NULL	NULL	NULL
Q9RV43	DR_1187	0.539116	0.0453402	0.138126	NULL	0.387066	0.293288	0.0870989	0.197078	NULL	0.0474449	NULL	0.0348601	0.163418	0.0261665	0.197881	0.333344	-2.07448	0.219191	-1.0403	-0.437802	1.97931	3.46578	down	no change	down	no change	up	up	0.0123619	0	2	late_up
Q9RV45	DR_1185	56.1718	84.4627	51.9692	60.9724	71.8444	95.9132	153.211	196.564	69.097	65.5016	90.7592	121.814	94.3658	112.212	106.834	126.786	-0.316374	0.254428	1.31447	0.659296	0.618024	0.795497	no change	no change	up	no change	no change	no change	1.24339e-05	1	0	NULL
Q9RV46	DR_1184	NULL	NULL	NULL	NULL	0.275721	0.293894	NULL	NULL	NULL	NULL	NULL	NULL	0.196719	0.345209	0.12288	0.202979	0	8.80659	0	0	8.7347	8.00085	no change	up	no change	no change	up	up	0.000270516	1	2	NULL
Q9RV47	DR_1183	0.0485342	NULL	NULL	NULL	0.229938	NULL	0.0115457	0.0179332	0.232305	0.046375	NULL	NULL	0.115208	0.961237	0.503605	0.243574	-5.27246	2.22937	-0.738102	-7.77521	1.94959	1.42284	down	up	no change	down	up	up	0.128094	NULL	NULL	NULL
Q9RV48	DR_1182	0.280694	0.727724	0.501503	0.49523	0.859376	0.876001	1.60878	0.845924	0.710969	0.650237	0.51875	0.240889	0.680767	0.753557	0.896536	0.591403	-0.0168137	0.783156	1.28345	-0.841502	0.0754845	0.128429	no change	no change	up	no change	no change	no change	0.0357362	1	0	NULL
Q9RV49	DR_1181	0.974524	1.2786	NULL	0.227317	0.18619	1.2256	NULL	NULL	0.989146	1.83002	NULL	NULL	NULL	0.174013	NULL	0.316073	-3.30512	-0.674399	-10.7905	-11.1138	-4.01274	-3.15404	down	no change	down	down	down	down	0.0333772	0	0	NULL
Q9RV50	DR_1180	4.66969	3.48644	5.36513	4.61848	3.33371	5.5629	14.2792	27.6626	5.13844	5.46249	5.12106	7.42148	5.54133	7.09079	0.5457	10.0918	0.291676	0.12537	2.36243	0.24264	0.252908	0.00496656	no change	no change	up	no change	no change	no change	0.000196346	1	0	NULL
Q9RV51	DR_1179	NULL	NULL	NULL	NULL	0.0127572	NULL	0.0182991	0.00943527	NULL	0.00930972	NULL	NULL	NULL	NULL	0.00820698	0.117912	0	3.39618	4.44635	-2.96683	-2.96683	3.66455	no change	up	up	down	down	up	0.0984959	NULL	NULL	NULL
Q9RV52	DR_1178	1.05475	0.455611	0.221939	1.30703	0.201311	NULL	0.0348638	NULL	0.446716	0.343278	0.313831	NULL	0.0244524	0.19988	0.0890637	0.178078	0.0176634	-2.90285	-5.41094	-1.32893	-1.8162	-1.56424	no change	down	down	down	down	down	0.0559776	NULL	NULL	NULL
Q9RV53	DR_1177	0.392554	0.243377	0.641592	0.372933	0.227047	0.854924	0.590792	0.97446	0.0518718	0.246238	0.293192	0.316979	1.69968	2.48885	1.5458	0.448607	0.673863	0.76672	1.29945	1.03337	3.81253	2.74204	no change	no change	up	up	up	up	0.000144058	1	3	NULL
Q9RV54	DR_1176	NULL	NULL	0.290832	NULL	0.594493	0.515018	NULL	NULL	NULL	0.0602785	0.601673	0.366564	0.406766	0.265737	0.284611	0.129693	7.83994	9.76845	0	3.9905	3.46468	2.76583	up	up	no change	up	up	up	8.22613e-05	2	3	sustain_up
Q9RV55	DR_1175	106.653	0.695371	2.41565	2.94038	1.48093	1.31615	1.16318	0.904701	2.03754	1.00225	83.8916	1.79163	1.77233	0.928828	2.38642	1.54019	-4.325	-5.26224	-5.69801	4.81697	-0.170389	0.369317	down	down	down	up	no change	no change	0.0304581	0	1	NULL
Q9RV56	DR_1174	0.847937	0.6359	0.874426	0.768568	0.984394	0.831865	1.26617	0.995294	0.387372	0.391815	0.746388	0.4633	1.00811	0.897618	0.914573	1.27743	0.146995	0.291637	0.607924	0.634593	1.2903	1.49221	no change	no change	no change	no change	up	up	0.0248753	0	2	late_up
Q9RV57	aroE	0.316361	0.423972	0.448344	0.36332	1.42471	1.30238	0.718842	0.549488	1.01558	0.444881	0.473646	0.525332	1.31191	1.34663	0.918991	1.08031	0.132707	1.88111	0.776684	-0.547896	0.864211	0.453078	no change	up	no change	no change	no change	no change	0.0171638	1	0	NULL
Q9RV58	DR_1172	34.5	12.4978	233.326	145.742	214.789	86.1533	172.572	125.972	48.083	9.0526	181.698	144.397	93.9782	48.4695	188.105	202.531	3.01179	2.67882	2.66728	2.51283	1.31797	2.77336	up	up	up	up	up	up	0.0230018	3	3	sustain_up
Q9RV59	DR_1171	1.63968	1.80888	2.31735	2.49952	1.13768	1.63134	1.67442	1.45934	1.63655	1.1648	0.990235	1.54086	2.18036	1.15821	1.49807	1.125	0.482105	-0.316617	-0.1381	-0.146362	0.253105	-0.0948706	no change	no change	no change	no change	no change	no change	0.00167729	0	0	NULL
Q9RV61	DR_1169	0.101264	0.275226	0.656353	1.30732	0.911331	0.827972	0.506821	1.21133	0.524697	0.457358	1.47585	0.587057	0.796854	1.37504	0.878596	0.373975	2.38288	2.20783	2.19018	1.0708	1.14508	0.351016	up	up	up	up	up	no change	0.362591	NULL	NULL	NULL
Q9RV62	nudC	NULL	NULL	NULL	0.0533213	0.0148357	NULL	0.0438223	NULL	0.0366464	NULL	NULL	NULL	0.0618025	NULL	NULL	NULL	5.40649	3.60431	5.12713	-4.87317	0.74394	-4.87317	up	up	up	down	no change	down	0.0477636	3	0	early_up
Q9RV63	DR_1167	26.3358	25.4394	10.6276	12.2598	9.88071	8.53676	21.6433	36.1871	10.2538	13.5614	15.0782	10.6671	11.285	11.5409	10.451	12.5123	-1.17771	-1.49119	0.159565	0.11243	-0.0612044	-0.0525454	down	down	no change	no change	no change	no change	1.18591e-05	0	0	NULL
Q9RV64	DR_1166	0.88275	1.66214	3.9075	4.68554	5.18624	6.20731	2.85715	2.34433	1.19753	1.4812	1.8825	3.50207	1.89849	1.57053	3.50909	5.02662	1.75557	2.16254	1.03132	1.00728	0.372984	1.67196	up	up	up	up	no change	up	2.21703e-07	3	2	sustain_up
Q9RV66	panC	11.0506	10.3684	5.46518	8.55208	8.84273	7.85195	10.6403	11.3128	9.56635	12.7522	7.67759	8.30274	6.76125	7.85526	7.80011	6.29977	-0.611684	-0.359499	0.0355343	-0.481946	-0.610645	-0.662561	no change	no change	no change	no change	no change	no change	0.000923699	0	0	NULL
Q9RV67	DR_1163	0.203057	0.195827	2.8917	0.236842	0.667527	0.455827	0.388071	0.429619	0.271539	0.160126	0.286741	0.335113	0.201046	0.353928	0.545238	0.566254	2.97145	1.49377	1.03559	0.526664	0.362508	1.36451	up	up	up	no change	no change	up	0.0808222	NULL	NULL	NULL
Q9RV68	greA	0.361924	0.4425	4.01432	10.0427	3.64948	1.54788	2.25164	4.61145	0.363032	0.0854337	2.01293	6.81232	1.93615	2.19941	4.23349	4.2803	4.12719	2.69175	3.09283	4.29857	3.20501	4.24673	up	up	up	up	up	up	0.266998	NULL	NULL	NULL
Q9RV69	DR_1161	22.1871	12.16	25.5461	22.1487	23.9428	21.8062	4.80497	3.93681	7.98804	7.95843	17.3202	9.72943	10.1855	5.56186	9.72835	11.0236	0.473643	0.41355	-1.97419	0.762372	-0.0181295	0.380011	no change	no change	down	no change	no change	no change	1.12248e-05	0	0	NULL
Q9RV70	DR_1160	21.4561	29.2612	15.0875	14.2054	14.3635	20.1847	23.0179	25.5135	25.4012	31.4509	18.6269	19.123	26.8503	27.6543	15.2647	13.1434	-0.79193	-0.553867	-0.0635587	-0.590742	-0.0608391	-1.00091	no change	no change	no change	no change	no change	down	3.71872e-06	0	0	NULL
Q9RV72	DR_1158	NULL	NULL	NULL	NULL	0.174884	0.260156	NULL	NULL	NULL	NULL	0.0988954	0.310403	1.8687	2.42199	0.430267	0.332168	0	8.41775	0	8.32975	11.7197	9.22722	no change	up	no change	up	up	up	1.29051e-10	1	3	NULL
Q9RV73	DR_1156	0.422608	0.452742	0.0328034	0.984836	0.319084	0.532973	NULL	NULL	0.407698	0.420683	0.0842118	0.143312	0.168784	0.190541	0.0630228	0.197426	0.217295	-0.0389098	-9.42646	-1.86428	-1.205	-1.66929	no change	no change	down	down	down	down	0.0832124	NULL	NULL	NULL
Q9RV74	DR_1155	1.59903	0.997213	1.3729	2.02716	0.621411	0.77943	0.479997	1.14349	1.3837	1.62661	0.873534	0.905102	0.279929	0.886589	0.867793	0.779992	0.389131	-0.890135	-0.677334	-0.759141	-1.3677	-0.869385	no change	no change	no change	no change	down	no change	0.00823563	0	0	NULL
Q9RV75	DR_1154	3.22728	2.92653	2.78832	5.47884	3.52064	5.17074	6.16348	4.08397	0.931109	0.743635	2.11882	3.0368	3.32304	4.84455	4.23567	3.69076	0.425911	0.498106	0.735714	1.62221	2.28597	2.24273	no change	no change	no change	up	up	up	0.182055	NULL	NULL	NULL
Q9RV76	allB	3.59544	2.73432	1.88235	2.01642	1.7254	1.93989	2.18992	2.6868	2.90815	3.9103	3.0056	2.0049	0.840124	2.11605	0.77501	1.91642	-0.699132	-0.78822	-0.376238	-0.444486	-1.20571	-1.34107	no change	no change	no change	no change	down	down	0.0221358	0	0	NULL
Q9RV77	DR_1152	2.31538	2.34174	5.74076	4.93611	1.54335	2.02827	2.06556	2.43468	1.77127	3.27144	2.11194	2.37972	1.75467	2.99053	0.417377	2.35947	1.19698	-0.382856	-0.0494346	-0.166951	-0.0877301	-0.860748	up	no change	no change	no change	no change	no change	6.24045e-05	1	0	NULL
Q9RV78	DR_1151	10.5858	5.31605	8.89733	12.9893	2.85402	2.75901	6.70113	9.40634	9.08246	8.57622	8.75655	6.87544	7.28635	4.40497	9.48438	7.44586	0.460856	-1.50234	0.0185346	-0.175876	-0.594939	-0.0607751	no change	down	no change	no change	no change	no change	0.016592	0	0	NULL
Q9RV79	miaB	2.36179	1.01441	3.16362	1.98977	2.391	2.72913	2.75458	2.52488	2.86563	1.91794	4.30784	2.74772	1.53935	1.5414	2.04646	1.91139	0.61012	0.600776	0.644989	0.560673	-0.634807	-0.27337	no change	no change	no change	no change	no change	no change	0.00350119	0	0	NULL
Q9RV80	DR_1149	1.85003	0.887582	1.06079	1.23047	0.742246	0.666006	4.14012	4.87073	0.15458	0.757062	0.931684	0.983239	1.31195	2.03641	0.550773	2.193	-0.256772	-0.959012	1.71875	1.07075	1.87691	1.58962	no change	no change	up	up	up	up	1.25957e-06	1	3	NULL
Q9RV81	DR_1148	2.5024	0.185503	2.0006	NULL	0.915121	1.50874	NULL	0.267523	0.0217054	1.92437	0.511546	NULL	5.96322	3.1704	0.580123	2.02084	-0.425589	-0.149175	-3.32532	-1.92584	2.23062	0.418481	no change	no change	down	down	up	no change	0.00306077	0	1	NULL
Q9RV82	DR_1147	1.65853	1.77408	0.643013	1.15171	0.924131	6.0318	1.21021	1.91642	1.74423	0.134514	0.657662	0.649487	0.309159	7.38251	0.277183	7.72871	-0.935541	1.01894	-0.134694	-0.523348	2.03353	2.09129	no change	up	no change	no change	up	up	0.562639	NULL	NULL	NULL
Q9RV83	DR_1146	31.4853	27.2038	42.1572	27.1704	42.8888	51.0502	23.0406	24.2502	47.0419	35.0398	29.6882	41.3029	41.2715	17.9636	34.7462	46.1574	0.240337	0.678631	-0.311533	-0.209421	-0.470608	-0.020857	no change	no change	no change	no change	no change	no change	0.00119723	0	0	NULL
Q9RV84	lepA	1.701	1.62271	2.51246	2.87155	2.3977	2.16913	3.06775	2.53949	1.96352	2.03457	1.89126	2.13409	2.26539	1.80283	1.97072	1.78166	0.695886	0.458398	0.754495	0.00980525	0.0250884	-0.0915038	no change	no change	no change	no change	no change	no change	1.65649e-05	0	0	NULL
Q9RV88	DR_1141	2.10079	2.33107	1.36393	1.82223	1.38381	1.61383	2.92256	1.81225	1.47817	2.2244	1.48673	1.84029	1.74984	1.8095	1.08756	0.341902	-0.476092	-0.564084	0.0953956	-0.154294	-0.0569158	-1.37305	no change	no change	no change	no change	no change	down	0.000152137	0	0	NULL
Q9RV89	DR_1140	0.214514	0.370258	0.317297	0.36477	1.02083	0.179107	0.482802	0.783078	0.235757	NULL	0.952095	0.219586	0.528148	0.0249265	1.17248	0.601267	0.22204	1.03701	1.1142	2.30932	1.22629	2.90754	no change	up	up	up	up	up	0.143455	NULL	NULL	NULL
Q9RV91	DR_1138	6.85948	5.45246	5.09649	3.91925	0.502147	0.160773	3.98563	0.693367	8.12622	7.91701	5.03982	6.43665	7.29131	4.73745	1.55109	0.153578	-0.44954	-4.21508	-1.39579	-0.483286	-0.415477	-3.2344	no change	down	down	no change	no change	down	3.22889e-05	0	0	NULL
Q9RV92	DR_1137	0.596236	0.495895	4.43352	0.0847258	0.773543	6.14453	0.898313	0.321712	0.149932	1.91829	0.164025	2.79792	1.82539	1.95732	0.00807443	1.97439	2.04862	2.66322	0.159765	0.518149	0.871025	-0.0610969	up	up	no change	no change	no change	no change	0.539126	NULL	NULL	NULL
Q9RV94	DR_1135	2.3509	2.95766	0.437464	0.450033	0.733124	1.17467	0.226951	NULL	1.40264	2.72764	0.336851	0.516029	1.89928	2.92879	0.381643	0.0467943	-2.5805	-1.47641	-4.54383	-2.27582	0.225208	-3.26909	down	down	down	down	no change	down	0.000557631	0	0	NULL
Q9RV96	hemE	10.7419	9.19799	6.10923	11.7519	5.81581	17.0177	19.4308	18.8112	17.7619	16.4425	19.0279	20.8102	26.2035	21.1361	24.31	14.8094	-0.158832	0.195495	0.939502	0.219964	0.468863	0.193699	no change	no change	no change	no change	no change	no change	0.0141364	0	0	NULL
Q9RV97	ilvD	7.76603	6.21994	7.9543	6.76526	11.7212	11.6814	9.13993	6.78955	6.98357	5.53291	6.76632	4.9749	6.66546	3.4582	8.23441	8.20361	0.0737534	0.742684	0.187718	-0.0922458	-0.306097	0.393208	no change	no change	no change	no change	no change	no change	2.06868e-05	0	0	NULL
Q9RV98	hemH	17.1113	17.4669	22.0987	16.3511	15.7661	18.0928	18.0992	22.9781	13.8847	14.2706	18.3996	17.7423	19.376	20.404	17.805	13.2381	0.153117	-0.0303238	0.24848	0.360262	0.498633	0.140861	no change	no change	no change	no change	no change	no change	0.00399522	0	0	NULL
Q9RV99	DR_1130	0.390693	0.826548	0.476186	0.330438	0.555478	0.49273	1.06383	0.688171	0.43134	1.40049	0.547165	1.06162	0.702019	1.06789	0.371884	0.599569	-0.593646	-0.215691	0.525391	-0.187316	-0.0496086	-0.915073	no change	no change	no change	no change	no change	no change	0.0294535	0	0	NULL
Q9RVA2	DR_1127	0.840338	0.838102	1.18762	0.856607	2.65125	3.02071	2.39003	3.34614	0.54952	0.71978	1.76328	1.67918	3.4506	2.53704	4.3386	3.33279	0.284436	1.75673	1.77297	1.4394	2.23796	2.59545	no change	up	up	up	up	up	0.0194839	2	3	sustain_up
Q9RVA3	recJ	0.361058	0.632651	0.70703	0.378167	0.73245	0.667071	0.331728	0.178249	0.278172	0.408663	0.471565	0.426873	0.307919	0.415281	0.213883	0.311683	0.127062	0.494037	-0.962391	0.387455	0.0744319	-0.386091	no change	no change	no change	no change	no change	no change	0.0253519	0	0	NULL
Q9RVA4	DR_1125	NULL	NULL	NULL	NULL	0.0637803	NULL	NULL	0.083911	0.723531	NULL	0.441069	NULL	0.0748242	NULL	1.16981	0.696149	0	5.6621	6.05443	-0.713239	-3.26253	1.36552	no change	up	up	no change	down	up	0.00294741	2	1	NULL
Q9RVA5	DR_1124	77.8076	66.8905	28.3113	26.6478	70.5757	63.8026	122.482	140.786	52.3642	39.5086	70.1325	89.7932	73.0168	95.2605	98.5556	74.7363	-1.39662	-0.106746	0.863487	0.799691	0.873131	0.915494	down	no change	no change	no change	no change	no change	6.36444e-08	0	0	NULL
Q9RVA6	murA	0.680941	0.117284	0.201405	0.148738	0.356836	0.138074	0.262465	0.283651	0.209804	0.154455	0.0551527	0.0985506	0.945191	0.179787	0.103887	1.26116	-1.18885	-0.68963	-0.547588	-1.24481	1.62686	1.90592	down	no change	no change	down	up	up	0.160551	NULL	NULL	NULL
Q9RVA7	DR_1122	0.179843	0.828587	0.31487	2.24211	0.629298	0.800617	1.04827	1.41517	0.15664	0.116809	0.570657	1.09784	0.779568	0.370077	0.827204	1.1019	1.34233	0.503819	1.28856	2.6092	2.07184	2.81859	up	no change	up	up	up	up	0.913591	NULL	NULL	NULL
Q9RVA8	DR_1121	1.42114	1.5472	1.20211	1.01892	0.619053	0.71631	NULL	0.0753468	1.14622	1.09167	0.546884	0.474497	0.683629	1.31929	0.129083	0.141666	-0.418431	-1.15243	-5.28784	-1.13162	-0.160034	-3.04711	no change	down	down	down	no change	down	2.06936e-05	0	0	NULL
Q9RVA9	buk	2.03917	1.93027	1.68812	1.15996	4.26587	3.35162	2.39875	2.3736	1.19059	1.95243	1.71173	1.73145	4.35297	4.67751	3.22773	1.88415	-0.47895	0.94038	0.265766	0.131589	1.52265	0.7017	no change	no change	no change	no change	up	no change	0.0708356	NULL	NULL	NULL
Q9RVB0	DR_1119	1.09616	1.08095	1.74792	0.848141	0.521964	1.55644	0.294128	0.510711	3.79298	1.98893	0.522272	2.83751	0.713738	0.58376	0.522006	0.854721	0.253911	-0.0669414	-1.43564	-0.783179	-2.15581	-2.0703	no change	no change	down	no change	down	down	0.0307411	0	0	NULL
Q9RVB1	DR_1118	0.676523	0.522307	0.440499	0.31364	0.786707	2.36539	0.770147	1.16976	0.588915	0.516652	0.437147	0.805945	0.093541	0.522299	0.298303	0.684652	-0.668726	1.39468	0.694363	0.169147	-0.84416	-0.169588	no change	up	no change	no change	no change	no change	0.00421341	1	0	NULL
Q9RVB2	DR_1117	7.12102	6.65398	8.13853	4.85874	5.31451	5.87244	8.47892	7.79548	8.13125	7.25351	6.87798	6.96369	5.79577	4.87372	5.88595	4.79897	-0.0838435	-0.300236	0.240552	-0.152484	-0.52801	-0.525926	no change	no change	no change	no change	no change	no change	0.00121754	0	0	NULL
Q9RVB3	DR_1116	5.2621	8.20091	3.2652	6.04291	1.88537	1.58886	2.77191	2.35536	4.96071	9.00546	3.54408	2.23968	3.26738	3.53609	2.48513	2.9221	-0.53244	-1.95424	-1.39274	-1.27186	-1.0376	-1.36897	no change	down	down	down	down	down	0.0790531	NULL	NULL	NULL
Q9RVB4	DR_1115	3.70548	3.37253	2.53395	4.23298	12.5051	11.2976	12.5587	14.6218	2.0309	3.35893	9.43811	9.26184	2.84346	6.12252	15.4196	11.799	-0.0648416	1.74971	1.94116	1.79472	0.734222	2.33628	no change	up	up	up	no change	up	8.33559e-08	2	2	sustain_up
Q9RVB5	DR_1114	NULL	NULL	NULL	NULL	0.204898	0.244584	0.445102	0.391455	NULL	NULL	0.247549	0.0400349	0.238551	0.2459	0.190943	0.0327759	0	8.46486	9.36106	7.82058	8.57295	7.45829	no change	up	up	up	up	up	3.57113e-06	2	3	sustain_up
Q9RVB9	pyrR	NULL	NULL	NULL	NULL	0.936172	0.508225	0.369037	0.712829	NULL	NULL	0.342286	0.0861774	0.361557	0.230515	0.599811	0.349022	0	10.149	9.73205	8.39577	8.86237	9.54275	no change	up	up	up	up	up	0.00223671	2	3	sustain_up
Q9RVC0	pyrB	0.965452	NULL	0.499634	0.598903	0.831504	1.37809	1.0156	1.7194	0.0563238	0.371896	1.26978	2.38419	0.185513	0.743446	0.94652	1.35412	0.185356	1.19356	1.50131	3.09304	1.11726	2.42561	no change	up	up	up	up	up	0.000689029	2	3	sustain_up
Q9RVC1	DR_1108	0.0230583	NULL	NULL	NULL	NULL	NULL	NULL	NULL	0.0127943	NULL	NULL	NULL	0.025764	NULL	0.0279052	NULL	-4.21922	-4.21922	-4.21922	-3.40017	0.975039	1.08755	down	down	down	down	no change	up	0.145106	NULL	NULL	NULL
Q9RVC2	DR_1107	NULL	0.0468667	NULL	NULL	0.119033	0.0194085	NULL	0.126942	NULL	0.0191529	NULL	NULL	0.0158149	0.0790761	0.0970772	0.0644217	-5.22268	1.5432	1.4253	-3.95937	2.26157	3.02875	down	up	up	down	up	up	0.746084	NULL	NULL	NULL
Q9RVC3	pyrC	4.83645	4.16965	2.23305	1.37203	1.87796	1.29331	1.27839	1.797	5.52837	4.81763	4.71845	4.39553	3.26354	3.16017	2.43561	3.11324	-1.32087	-1.50584	-1.55013	-0.182919	-0.687593	-0.898812	down	down	down	no change	no change	no change	0.000150812	0	0	NULL
Q9RVC4	radA	0.015353	0.00119527	0.181484	0.140037	0.401353	0.239072	0.421506	0.0757145	0.304618	NULL	0.165334	0.0223705	0.227193	0.0261141	0.0903066	0.0860306	4.28016	5.27428	4.90913	-0.701547	-0.269123	-0.791673	up	up	up	no change	no change	no change	0.0340729	3	0	early_up
Q9RVC5	DR_1104	5.41431	9.89941	3.11628	7.4413	4.3801	5.26658	3.66031	0.211564	7.14487	9.8468	4.48193	8.15689	4.57969	7.62988	2.59437	2.38838	-0.536546	-0.66672	-1.98372	-0.426966	-0.476816	-1.76981	no change	no change	down	no change	no change	down	0.982078	NULL	NULL	NULL
Q9RVC6	DR_1103	0.619386	0.568225	0.630494	0.405477	0.293654	0.216116	0.438223	0.383435	0.596905	0.386166	0.59631	0.770155	0.398742	0.225951	0.590222	0.278221	-0.197079	-1.22015	-0.531452	0.475082	-0.654146	-0.178864	no change	down	no change	no change	no change	no change	0.126808	NULL	NULL	NULL
Q9RVC7	DR_1102	0.299973	0.553259	0.157812	0.0968642	NULL	NULL	0.640867	0.365542	0.176006	0.589194	0.417737	0.387284	0.485351	0.369421	0.561916	0.423588	-1.74427	-9.38954	0.238206	0.0731887	0.159703	0.365024	down	down	no change	no change	no change	no change	0.00296502	0	0	NULL
Q9RVC9	trhO	0.423792	0.454693	0.236918	0.0337048	0.640104	0.340115	0.393951	0.436683	0.449932	0.562604	0.419578	0.36475	1.57852	1.68638	0.828126	0.468596	-1.69874	0.158088	-0.0808041	-0.368445	1.68906	0.356896	down	no change	no change	no change	up	no change	1.393e-07	0	1	NULL
Q9RVD0	DR_1099	0.0411451	0.261395	0.439706	0.471137	0.479861	0.296739	0.236594	0.472793	0.105779	0.100996	0.337215	0.206116	0.307446	0.495604	0.184459	0.209452	1.59008	1.36005	1.22945	1.39377	1.95743	0.929808	up	up	up	up	up	no change	0.134652	NULL	NULL	NULL
Q9RVD2	DR_1097	0.176303	0.220213	0.0484223	0.0383136	0.101636	0.0947088	0.164748	0.511937	0.524748	0.77106	0.221811	0.118008	0.678401	0.502757	0.268249	0.185652	-2.19268	-1.01399	0.771105	-1.93101	-0.13365	-1.5134	down	down	no change	down	no change	down	3.30747e-05	0	0	NULL
Q9RVD3	aroA	0.749919	1.0401	0.110278	0.134936	0.509221	0.454101	0.456554	2.17834	1.01598	1.53784	0.916717	0.826536	0.894528	1.1411	0.860365	0.485907	-2.86787	-0.893885	0.557771	-0.550872	-0.327176	-0.923685	down	no change	no change	no change	no change	no change	0.0107031	0	0	NULL
Q9RVD7	DR_1092	0.167261	NULL	NULL	NULL	0.192239	0.251785	NULL	NULL	0.0364208	NULL	NULL	0.176246	0.18808	NULL	0.146052	0.117781	-7.04417	1.40306	-7.04417	2.25498	2.34841	2.83181	down	up	down	up	up	up	0.00265185	1	3	NULL
Q9RVD8	DR_1091	0.237947	0.21165	0.492751	0.220699	0.941112	0.566902	NULL	NULL	0.591227	0.423633	0.141802	0.229937	0.204368	0.765465	0.468745	0.233063	0.666183	1.74595	-8.46523	-1.44892	-0.0654725	-0.532132	no change	up	down	down	no change	no change	0.00223158	1	0	NULL
Q9RVD9	DR_1090	0.0679233	0.057267	0.0327815	0.0544976	0.0353973	NULL	0.0545828	0.0314148	0.0275931	NULL	0.0131224	NULL	0.0288132	NULL	0.0268395	NULL	-0.520414	-1.79672	-0.541755	-1.03686	0.0610467	-0.039036	no change	down	no change	down	no change	no change	0.0314455	0	0	NULL
Q9RVE0	recF	0.0442412	0.153803	0.588126	0.389106	4.82471	2.17082	0.571308	NULL	0.0511381	0.17336	1.33013	0.665421	0.662467	0.256722	0.899497	0.354444	2.30288	5.14254	1.53005	3.15201	2.03366	2.48169	up	up	up	up	up	up	4.23134e-05	3	3	sustain_up
Q9RVE1	DR_1088	NULL	0.0919119	NULL	NULL	0.0416875	0.312517	NULL	NULL	0.0203472	NULL	0.0553048	NULL	0.0256829	NULL	0.0300124	NULL	-6.18487	1.93631	-6.18487	1.41466	0.32686	0.546573	down	up	down	up	no change	no change	0.0222312	1	1	NULL
Q9RVE3	alr	0.335428	0.342792	1.20178	0.152749	0.736773	0.123162	0.113355	0.312849	0.288382	0.269193	0.075063	0.142123	0.219287	0.124724	0.0778215	0.0639547	0.997968	0.342473	-0.670213	-1.36023	-0.696711	-1.97555	no change	no change	no change	down	no change	down	0.238557	NULL	NULL	NULL
Q9RVE4	DR_1085	0.123877	0.315075	0.138848	0.270622	0.39021	0.62881	0.934899	0.844208	0.2809	0.0731993	0.0632929	0.172281	1.43376	1.40649	0.571626	0.317288	-0.100308	1.21505	2.01902	-0.587974	3.00379	1.32789	no change	up	up	no change	up	up	2.70895e-09	2	2	sustain_up
Q9RVE5	DR_1084	1.51633	1.40094	3.29149	1.3311	1.78777	1.46042	1.29457	1.72866	1.24195	1.58933	1.03866	1.40285	0.80855	0.570253	1.37909	1.11213	0.664084	0.155018	0.0514735	-0.21368	-1.03804	-0.1846	no change	no change	no change	no change	down	no change	0.0783112	NULL	NULL	NULL
Q9RVE7	hpf	NULL	NULL	0.242434	0.0666301	2.0382	1.1591	0.93463	0.401907	NULL	0.266564	1.7648	2.63398	0.549491	0.178297	2.15221	3.63589	7.92451	11.2954	10.037	4.04111	1.4456	4.4371	up	up	up	up	up	up	7.11833e-07	3	3	sustain_up
Q9RVE8	DR_1081	0.575466	0.416849	0.39321	0.334391	0.379712	0.0237916	0.623227	0.699887	0.420522	0.289569	0.0732261	0.352419	0.440368	0.548234	0.147078	0.34262	-0.447651	-1.29822	0.415068	-0.738351	0.477386	-0.536109	no change	down	no change	no change	no change	no change	0.000118612	0	0	NULL
Q9RVE9	DR_1080	0.0278296	0.0451988	0.0939646	NULL	0.0843489	0.107564	0.152857	0.114962	NULL	NULL	0.0352271	0.0827026	0.117078	0.101866	0.106547	0.187425	0.373391	1.39392	1.87473	6.53453	7.42717	7.85228	no change	up	up	up	up	up	0.279193	NULL	NULL	NULL
Q9RVF0	DR_1079	NULL	NULL	NULL	NULL	0.738653	0.245664	0.402828	NULL	NULL	NULL	0.347277	NULL	1.20741	NULL	0.867162	NULL	0	9.59572	8.30904	8.09533	9.8912	9.41396	no change	up	up	up	up	up	0.913079	NULL	NULL	NULL
Q9RVF1	DR_1078	2.53874	1.81805	1.00508	1.03636	1.59298	1.18003	4.06172	3.21839	1.54073	1.38128	2.19374	1.96059	2.66429	1.85953	1.98682	1.72123	-1.09368	-0.651815	0.740693	0.507658	0.630584	0.343702	down	no change	no change	no change	no change	no change	1.1517e-07	0	0	NULL
Q9RVF2	DR_1077	0.144841	0.200768	0.0092084	NULL	0.420664	0.231699	0.334814	0.362415	0.285925	0.399214	0.369516	0.145911	0.385468	0.325284	0.384167	0.254989	-5.13369	0.916533	1.01249	-0.41063	0.0529482	-0.100229	down	no change	up	no change	no change	no change	0.00447159	1	0	NULL
Q9RVF3	DR_1076	0.0377298	0.461626	0.418347	0.20254	0.454487	0.484652	0.501095	0.436129	0.0089287	0.0390387	0.209977	0.307945	0.442036	0.386541	0.447843	0.243277	0.314262	0.91127	0.908327	3.43261	4.11051	3.84881	no change	no change	no change	up	up	up	0.373787	NULL	NULL	NULL
Q9RVF4	DR_1075	0.844108	0.990824	1.4175	0.0251042	0.642659	0.385401	0.707467	0.993186	0.389634	2.28504	1.12478	1.26073	0.851393	0.809023	1.02156	0.97632	-0.347047	-0.835804	-0.109638	-0.165061	-0.687819	-0.420895	no change	no change	no change	no change	no change	no change	0.914992	NULL	NULL	NULL
Q9RVF5	fabZ	6.95668	12.7751	4.34212	0.00208119	1.06998	0.774657	16.9744	6.42286	9.11663	10.3289	8.17905	6.73878	7.49752	0.375915	7.82682	0.330045	-2.18336	-3.41912	0.245817	-0.3824	-1.30437	-1.25335	down	down	no change	no change	down	down	0.00839897	0	0	NULL
Q9RVF7	DR_1072	2.31013	1.91959	3.94588	3.30674	5.09529	3.13586	2.80189	2.12648	3.61444	4.64543	2.22328	2.397	3.68746	4.02414	4.38885	4.64285	0.777936	0.960529	0.220544	-0.838141	-0.0990898	0.128878	no change	no change	no change	no change	no change	no change	5.94572e-06	0	0	NULL
Q9RVF8	DR_1071	27.2812	37.7129	34.69	24.5646	14.9055	19.4257	3.48296	4.5615	20.8135	27.9092	18.3119	24.8629	15.4248	1.54959	16.5793	16.1404	-0.133382	-0.920787	-3.01424	-0.174404	-1.52123	-0.574436	no change	no change	down	no change	down	no change	0.00064414	0	0	NULL
Q9RVF9	DR_1070	1.81533	NULL	0.0698119	NULL	NULL	1.06308	4.83571	NULL	0.144108	0.527493	0.704606	0.478051	1.13308	0.825488	NULL	0.374433	-4.68804	-0.771623	1.41318	0.816354	1.54412	-0.840452	down	no change	up	no change	up	no change	0.0712246	NULL	NULL	NULL
Q9RVG1	hbd	38.2735	38.396	23.8093	24.6279	13.3719	7.20607	11.2371	4.61969	25.4726	26.725	23.5014	11.8903	13.2838	13.8367	16.0251	10.1228	-0.662536	-1.89755	-2.27355	-0.560571	-0.944597	-0.99729	no change	down	down	no change	no change	no change	0.000162885	0	0	NULL
Q9RVG2	DR_1067	10.8538	1.04635	0.38607	3.59661	5.05319	14.3053	7.03855	6.66209	13.1184	16.6311	12.1963	14.5562	9.47805	19.1468	8.16304	16.7374	-1.57917	0.701981	0.203259	-0.153193	-0.0555969	-0.256693	down	no change	no change	no change	no change	no change	0.332978	NULL	NULL	NULL
Q9RVG4	DR_1065	0.440132	0.534697	0.227766	NULL	1.03371	1.17768	2.92014	3.04221	2.50314	2.27504	NULL	NULL	1.64527	2.61489	0.855242	1.25166	-2.09357	1.18173	2.61266	-11.875	-0.165554	-1.18134	down	up	up	down	no change	down	9.49906e-11	2	0	early_up
Q9RVG5	DR_1064	0.601655	NULL	0.262612	0.239757	0.28136	0.274778	0.0904462	0.0501397	0.0775639	0.647195	0.128367	0.200601	0.0548837	0.0954284	0.456437	0.0406082	-0.261714	-0.11502	-2.09901	-1.13956	-2.26954	-0.544125	no change	no change	down	down	down	no change	0.242346	NULL	NULL	NULL
Q9RVG6	DR_1063	0.546968	1.02984	2.18221	0.652013	3.35532	2.40839	1.12993	1.10785	11.9698	10.5353	4.76848	4.87716	19.4909	19.6743	1.63059	1.55518	0.845949	1.86999	0.505065	-1.2223	0.799324	-2.82053	no change	up	no change	down	no change	down	1.04676e-15	1	0	NULL
Q9RVG7	DR_1062	1.70241	0.916672	1.56927	1.04755	2.78887	1.25369	3.35421	2.38928	2.60816	2.74021	2.33658	1.7051	2.81146	2.98777	1.66633	1.7681	-0.00124918	0.626206	1.13287	-0.404144	0.116763	-0.639028	no change	no change	up	no change	no change	no change	0.000171713	1	0	NULL
Q9RVG8	DR_1061	4.23197	4.71821	7.69462	12.1855	6.15993	7.43703	7.88017	16.8317	3.83951	3.4452	6.67707	10.8252	2.54147	5.0036	5.33222	9.97844	1.15134	0.603296	1.46522	1.2646	0.050662	1.07159	up	no change	up	up	no change	up	0.400049	NULL	NULL	NULL
Q9RVG9	DR_1060	NULL	NULL	0.288366	0.077431	0.523564	0.576706	0.565428	0.607579	0.177187	NULL	0.296874	0.00939543	0.23952	0.549153	0.476076	0.293425	8.16765	9.75638	9.84874	0.78436	2.14898	2.11348	up	up	up	no change	up	up	0.0730069	NULL	NULL	NULL
Q9RVH0	DR_1059	0.405378	0.251499	0.24953	0.165315	0.0708648	0.120474	0.0899812	0.196	0.454364	0.43736	0.301349	0.365632	0.481542	0.301566	0.141531	0.303887	-0.663052	-1.77949	-1.1997	-0.418953	-0.187385	-1.00144	no change	down	down	no change	no change	down	0.0240262	0	0	NULL
Q9RVH1	DR_1058	0.265243	0.19285	0.370594	0.324093	0.823505	0.382022	0.329934	0.144507	1.82835	0.940542	0.268067	0.158419	0.373096	1.19273	0.312116	0.558546	0.600721	1.39595	0.050587	-2.69874	-0.822381	-1.66912	no change	up	no change	down	no change	down	0.00135521	1	0	NULL
Q9RVH3	DR_1056	0.375236	0.174077	NULL	0.0156319	0.414068	0.307766	0.077718	0.0905878	0.2414	NULL	NULL	NULL	0.00206459	0.0893023	0.192394	0.190499	-5.07752	0.394037	-1.70655	-7.57182	-1.40548	0.66172	down	no change	down	down	down	no change	0.000110887	0	0	NULL
Q9RVH4	aspS2	6.06544	7.48862	10.7648	9.1498	13.3433	12.5006	20.8762	10.4745	5.61228	6.87533	12.0195	10.5745	11.2846	10.1471	15.9709	9.88177	0.555102	0.931093	1.20977	0.855441	0.779245	1.04982	no change	no change	up	no change	no change	up	0.398013	NULL	NULL	NULL
Q9RVH6	DR_1053	0.116655	0.300659	0.314941	0.220103	0.141311	0.146049	0.540448	0.911123	0.0449188	0.290405	0.329707	0.245087	0.340395	0.395213	0.261768	0.730705	0.358522	-0.538274	1.79841	0.777492	1.13338	1.56547	no change	no change	up	no change	up	up	0.0379683	1	2	NULL
Q9RVH7	DR_1052	0.0923806	0.103494	0.200465	NULL	0.214697	0.131321	0.132343	0.264768	NULL	0.0589301	0.0397303	0.0850008	0.0980776	NULL	0.0600151	0.0769834	0.0379915	0.820919	1.01962	1.06625	0.728757	1.20159	no change	no change	up	up	no change	up	0.34768	NULL	NULL	NULL
Q9RVH8	DR_1051	NULL	NULL	NULL	NULL	NULL	NULL	0.0124918	0.112177	NULL	NULL	NULL	0.1436	0.137837	NULL	0.0966766	0.133367	0	0	6.6147	6.82504	6.7662	7.49851	no change	no change	up	up	up	up	0.399883	NULL	NULL	NULL
Q9RVI3	clpB	8.98183	4.58628	9.03892	9.59956	11.9954	9.57223	4.17163	5.12035	10.2156	7.54562	7.20014	9.1981	7.91513	7.58911	6.44648	4.94464	0.458064	0.668647	-0.546162	-0.115187	-0.196065	-0.640818	no change	no change	no change	no change	no change	no change	0.00503282	0	0	NULL
Q9RVI8	DR_1041	0.144806	0.0460334	0.33056	0.0176099	0.195231	0.0129195	0.752469	0.161547	1.12447	0.0296825	0.334222	0.00533991	0.449337	0.0269345	0.872867	0.320283	0.867431	0.125268	2.25986	-1.76508	-1.27697	0.0479459	no change	no change	up	down	down	no change	0.462178	NULL	NULL	NULL
Q9RVJ0	DR_1038	60.8194	48.587	48.0675	25.3795	22.7381	18.6425	19.0031	17.4067	49.4528	39.0851	52.1431	51.2873	23.9994	18.4715	35.6711	30.812	-0.574922	-1.40267	-1.5873	0.224293	-1.05982	-0.413308	no change	down	down	no change	down	no change	0.00119974	0	0	NULL
Q9RVJ1	DR_1037	1.39422	1.87229	1.28537	NULL	0.252783	0.089403	NULL	1.24977	0.348998	0.381088	0.843319	0.495345	0.53856	0.832721	0.487486	0.651631	-1.34485	-3.2549	-1.38536	0.874657	0.909387	0.641779	down	down	down	no change	no change	no change	0.00242473	0	0	NULL
Q9RVJ2	DR_1036	3.82753	4.16319	0.0369588	0.579764	3.84063	5.27356	2.17832	3.94593	2.47872	4.78913	3.44263	4.41998	2.61787	2.59803	2.21994	3.04246	-3.69563	0.189788	-0.383792	0.11348	-0.478614	-0.465808	down	no change	no change	no change	no change	no change	6.90828e-06	0	0	NULL
Q9RVJ3	DR_1035	0.432468	0.0321043	0.350973	0.793007	0.392764	0.343207	0.854425	0.0433624	0.419682	0.231782	0.369984	0.0766049	0.301113	0.0269717	0.648824	0.431002	1.30009	0.663744	0.95047	-0.544739	-0.989617	0.72904	up	no change	no change	no change	no change	no change	0.177421	NULL	NULL	NULL
Q9RVJ4	DR_1034	1.7582	1.86862	1.77701	1.05513	2.64339	3.8955	1.61516	3.45948	2.03713	0.913759	2.28307	1.7203	1.76052	2.56598	2.40558	3.08779	-0.35681	0.850342	0.484603	0.440062	0.552049	0.896541	no change	no change	no change	no change	no change	no change	0.0534593	NULL	NULL	NULL
Q9RVJ7	DR_1031	0.25788	0.42716	0.533189	0.124549	0.286973	0.435081	1.03109	0.251321	0.57575	0.195179	0.278909	0.202366	0.757077	0.282864	0.933168	0.484502	-0.0586734	0.0759202	0.9046	-0.679738	0.431832	0.878852	no change	no change	no change	no change	no change	no change	0.78513	NULL	NULL	NULL
Q9RVJ8	DR_1030	0.0543027	0.0568015	0.117653	NULL	0.170177	0.301149	0.0879175	1.51738	0.120034	0.272435	0.106756	0.0382939	0.0500811	0.261845	0.399898	0.424895	0.0903979	2.08481	3.85285	-1.43604	-0.331377	1.07145	no change	up	up	down	no change	up	0.361199	NULL	NULL	NULL
Q9RVK0	DR_1028	1.02453	NULL	NULL	NULL	NULL	NULL	0.606433	1.05481	NULL	NULL	NULL	NULL	NULL	0.0295792	0.328381	0.287216	-9.65439	-9.65439	0.696397	0	4.56995	8.91859	down	down	no change	no change	up	up	0.0394112	0	2	late_up
Q9RVK1	DR_1026	0.111372	0.0530755	0.0857588	0.13046	0.267426	0.285492	0.472772	0.336855	0.159756	0.103832	0.124777	0.132851	0.334107	0.0346819	0.27058	0.228745	0.394869	1.74944	2.29963	-0.032992	0.484514	0.921698	no change	up	up	no change	no change	no change	0.0334122	2	0	early_up
Q9RVK2	DR_1025	NULL	NULL	NULL	0.119352	0.246409	0.227238	0.0370024	0.178783	NULL	NULL	0.069196	NULL	0.0961485	0.161233	0.177967	0.189901	6.55949	8.54041	7.4062	5.77856	7.66051	8.17579	up	up	up	up	up	up	0.00482552	3	3	sustain_up
Q9RVK5	DR_1022	0.77943	0.300727	1.32539	0.880898	0.858506	0.486341	0.495907	0.489607	0.265178	0.161718	0.773482	0.466983	0.492518	0.123074	0.418324	0.759415	1.03038	0.3162	-0.132293	1.53893	0.528089	1.46406	up	no change	no change	up	no change	up	0.0466029	1	2	NULL
Q9RVK6	DR_1021	8.01579	9.56569	6.73573	7.00294	14.64	14.0383	28.6223	46.1469	11.3884	11.7959	10.692	13.6522	32.0968	17.2015	37.0864	20.3609	-0.355813	0.705906	2.08839	0.0704314	1.08839	1.30909	no change	no change	up	no change	up	up	0.0319385	1	2	NULL
Q9RVK7	ftsH	0.025113	0.050403	0.256221	0.252609	0.0366407	0.0993317	0.421813	0.13385	0.0129742	NULL	0.0340481	0.108283	0.114958	0.175128	0.0626369	0.175216	2.75233	0.84846	2.87936	3.38648	4.41371	4.1273	up	no change	up	up	up	up	0.0046712	2	3	sustain_up
Q9RVK8	DR_1019	45.2579	34.0345	33.7743	24.9142	53.6756	46.9193	39.5488	33.3708	33.5576	29.6418	43.3826	45.5738	46.3738	36.6784	49.1977	47.2156	-0.434103	0.343303	-0.120876	0.493186	0.394107	0.60932	no change	no change	no change	no change	no change	no change	1.578e-05	0	0	NULL
Q9RVK9	DR_1018	0.741613	0.749133	0.230893	0.41587	1.70969	1.47665	1.99001	1.46002	0.853676	0.886548	0.38438	0.459102	3.32913	2.60918	1.00515	1.42509	-1.20472	1.09586	1.21057	-1.04484	1.77078	0.481824	down	up	up	down	up	no change	1.29056e-06	2	1	NULL
Q9RVL0	DR_1017	0.0614791	0.0145973	NULL	0.00618881	0.387964	0.75582	NULL	NULL	0.0260248	0.163018	0.110449	0.335879	0.5693	0.897938	0.0480956	0.294163	-3.47857	3.91022	-5.90212	1.23939	2.95632	0.856373	down	up	down	up	up	no change	0.62365	NULL	NULL	NULL
Q9RVL1	mnmE	0.266015	0.357466	0.236109	0.567869	0.534791	0.580084	0.669651	0.835629	0.0361097	0.327951	0.208208	0.436427	0.386775	0.456602	0.720195	0.771304	0.36681	0.838464	1.27162	0.824306	1.212	2.03451	no change	no change	up	no change	up	up	0.634725	NULL	NULL	NULL
Q9RVL2	DR_1015	NULL	NULL	0.0263645	0.0325042	0.850619	1.32456	0.176377	0.109746	NULL	0.0814413	NULL	0.0520803	1.03815	1.4409	0.22858	0.674462	5.53217	10.7397	7.81323	-0.638734	4.91666	3.45974	up	up	up	no change	up	up	0.241062	NULL	NULL	NULL
Q9RVL5	DR_1012	0.712102	0.803847	1.23611	0.835701	0.178592	0.972571	1.42324	1.15094	0.465992	1.34836	0.742946	1.22911	0.364396	1.61857	0.392858	1.05977	0.450674	-0.397129	0.763888	0.12025	0.128207	-0.320785	no change	no change	no change	no change	no change	no change	0.141035	NULL	NULL	NULL
Q9RVL6	mqnD	1.45466	0.300836	0.814509	0.662113	1.5269	2.63839	1.52492	2.08152	1.35662	0.642774	0.872654	1.4341	1.18383	1.288	1.14269	2.19427	-0.249577	1.24654	1.0387	0.206307	0.306023	0.738977	no change	up	up	no change	no change	no change	0.068143	NULL	NULL	NULL
Q9RVL9	DR_1008	0.378735	0.153592	0.0959545	0.107935	0.822606	0.957186	0.466316	1.03628	0.233536	0.41552	0.641494	0.575591	1.26343	1.90477	0.470662	0.66793	-1.38452	1.74132	1.49707	0.907015	2.28725	0.810837	down	up	up	no change	up	no change	0.0011164	2	1	NULL
Q9RVM0	DR_1007	NULL	NULL	NULL	NULL	0.41171	0.163164	0.095323	0.0674788	NULL	NULL	0.0484252	0.0363603	0.123621	0.0423953	0.274173	0.205347	0	8.81985	6.99972	6.05849	7.02792	8.55819	no change	up	up	up	up	up	7.01878e-05	2	3	sustain_up
Q9RVM1	DR_1006	0.0246505	0.0229681	0.181451	NULL	0.179841	0.120548	0.863495	0.115844	NULL	NULL	0.158807	0.028114	0.065645	0.0950607	0.179511	0.0510925	1.93503	2.65723	4.36221	7.19903	6.98102	7.50202	up	up	up	up	up	up	0.113373	NULL	NULL	NULL
Q9RVM4	DR_1003	0.661385	2.49881	0.397775	1.83894	0.294552	1.16659	1.00734	0.468003	0.705944	3.21437	1.7381	1.81768	0.404309	0.25824	0.644843	1.07669	-0.498632	-1.11291	-1.09896	-0.140802	-2.56487	-1.18728	no change	down	down	no change	down	down	0.53918	NULL	NULL	NULL
Q9RVM5	DR_1002	0.0219963	NULL	NULL	NULL	0.266166	0.0391973	0.0561739	0.0310952	NULL	NULL	NULL	NULL	NULL	0.0588035	NULL	0.016061	-4.15306	3.75407	1.94708	0	5.5461	3.71427	down	up	up	no change	up	up	0.083527	NULL	NULL	NULL
Q9RVM6	DR_1001	0.364404	0.347128	0.490061	0.439087	2.87647	3.03426	6.66654	8.07981	0.377634	0.428911	1.51027	0.819672	2.98792	2.7757	6.0134	4.04677	0.38498	3.05434	4.37328	1.53046	2.83715	3.64076	no change	up	up	up	up	up	0.000135733	2	3	sustain_up
Q9RVM7	DR_1000	NULL	NULL	NULL	0.0396717	0.25463	0.350463	0.00585104	NULL	0.114828	0.127893	NULL	NULL	0.166373	0.20205	0.322531	0.226858	4.98573	8.89376	2.35032	-7.5759	0.602059	1.17852	up	up	up	down	no change	up	3.58615e-09	3	1	NULL
Q9RVM8	DR_0999	NULL	NULL	NULL	NULL	0.19675	0.138276	0.0188306	0.155562	NULL	NULL	0.1149	0.111635	0.019277	0.0059399	0.21585	0.212039	0	8.04087	7.09893	7.47633	4.30906	8.39384	no change	up	up	up	up	up	2.19885e-07	2	3	sustain_up
Q9RVM9	mrp	2.46706	3.07143	3.74913	2.72271	4.25071	2.54865	4.01214	3.93073	3.17924	2.93283	4.35106	5.32821	3.63608	4.43254	3.24011	3.1781	0.224682	0.295906	0.520169	0.663238	0.400662	0.0705125	no change	no change	no change	no change	no change	no change	0.00214251	0	0	NULL
Q9RVN0	DR_0997	NULL	NULL	NULL	NULL	0.0981587	0.526584	NULL	0.105	NULL	NULL	NULL	0.0904734	0.116495	0.255519	0.624257	0.579645	0	8.93986	6.37571	6.16227	8.19195	9.88625	no change	up	up	up	up	up	1.6293e-05	2	3	sustain_up
Q9RVN2	DR_0995	NULL	NULL	NULL	NULL	0.0705083	NULL	0.277918	NULL	NULL	NULL	0.105311	NULL	NULL	0.246807	NULL	0.161747	0	5.80542	7.77456	6.37994	7.6037	6.996	no change	up	up	up	up	up	0.381657	NULL	NULL	NULL
Q9RVN4	DR_0993	NULL	NULL	0.206533	NULL	0.705195	0.81894	NULL	0.177906	NULL	NULL	0.243022	0.594405	0.771185	0.905331	0.565533	1.09282	7.34741	10.2265	7.13286	9.36256	10.364	10.3483	up	up	up	up	up	up	0.000459904	3	3	sustain_up
Q9RVN5	DR_0992	0.887168	0.57231	0.787776	0.38583	1.011	0.876735	1.40045	0.489088	0.569821	0.656415	2.90383	0.88212	2.70125	0.900575	0.830117	1.06572	-0.314504	0.371206	0.372578	1.62642	1.55449	0.628594	no change	no change	no change	up	up	no change	0.0847766	NULL	NULL	NULL
Q9RVN6	DR_0991	3.59615	5.09522	1.08834	0.851969	0.669127	2.47969	2.67834	4.41027	3.08371	3.71903	2.40609	3.4034	2.5284	3.5201	2.2767	2.33841	-2.16329	-1.46477	-0.294082	-0.227705	-0.16954	-0.559754	down	down	no change	no change	no change	no change	0.000283035	0	0	NULL
Q9RVN8	DR_0989	0.411216	0.180133	0.310152	0.572529	2.19182	4.03319	2.12182	4.42458	1.88513	1.54391	1.21311	1.70216	12.9253	13.3172	2.34382	3.82304	0.577882	3.396	3.46862	-0.234174	2.93603	0.846732	no change	up	up	no change	up	no change	2.79623e-10	2	1	NULL
Q9RVN9	DR_0988	1.68557	0.623231	0.302837	0.450438	2.01693	3.2816	1.85243	1.65533	2.52299	2.32361	0.609037	0.628099	4.06157	7.17311	4.40026	3.34161	-1.61589	1.19845	0.603406	-1.96997	1.21292	0.67571	down	up	no change	down	up	no change	0.0143985	1	1	NULL
Q9RVP0	DR_0987	0.178953	0.174533	1.62574	1.55561	2.84728	2.04909	1.42608	0.868474	0.0546656	0.0444524	1.56445	1.15103	0.651109	0.410206	2.23715	1.79345	3.16991	3.79199	2.69849	4.77592	3.42056	5.3457	up	up	up	up	up	up	4.0217e-08	3	3	sustain_up
Q9RVP1	DR_0986	75.2157	63.5989	107.763	132.661	54.0685	65.1061	41.8278	54.1595	49.1342	59.6208	58.3463	75.4527	39.4528	41.2484	39.111	45.9287	0.792422	-0.220082	-0.532244	0.298987	-0.430419	-0.354872	no change	no change	no change	no change	no change	no change	9.41268e-05	0	0	NULL
Q9RVP2	DR_0983	NULL	NULL	NULL	NULL	0.0204	0.0206488	NULL	NULL	NULL	NULL	NULL	NULL	0.00337195	NULL	NULL	NULL	0	5.01201	0	0	1.65563	0	no change	up	no change	no change	up	no change	3.19549e-17	1	1	NULL
Q9RVP3	DR_0982	2.77919	0.513845	1.09381	0.225477	0.0018566	NULL	1.29238	0.105539	0.640671	0.201478	1.36599	0.297981	0.51679	0.0463795	0.766805	0.165578	-1.31966	-10.3675	-1.23614	0.982482	-0.580508	0.146846	down	down	down	no change	no change	no change	0.100963	NULL	NULL	NULL
Q9RVP5	DR_0980	10.964	16.2414	17.5421	17.1925	19.0723	20.7942	29.1618	21.8437	11.5165	14.4085	19.1211	16.5742	7.26269	14.2487	21.1987	18.3094	0.35248	0.551286	0.906761	0.461395	-0.26924	0.60781	no change	no change	no change	no change	no change	no change	0.00521873	0	0	NULL
Q9RVP6	pckA	6.64153	3.66479	8.25771	6.73294	6.49199	4.49732	1.51416	3.58513	5.86403	3.18287	0.883379	5.61722	3.04787	2.27186	4.77751	5.69422	0.540534	0.092571	-1.01516	-0.476851	-0.766071	0.211005	no change	no change	down	no change	no change	no change	0.00120187	0	0	NULL
Q9RVP7	DR_0975	1.25179	1.27309	1.64646	1.63622	0.820052	0.775428	1.2332	1.29271	0.75549	0.968325	0.739785	1.12284	0.497882	0.721587	1.01097	1.13512	0.378656	-0.662225	0.000585917	0.111735	-0.499352	0.316109	no change	no change	no change	no change	no change	no change	0.000354336	0	0	NULL
Q9RVP9	DR_0973	0.419892	0.29981	0.643779	0.0955245	0.371741	0.220438	NULL	0.0769253	0.363248	0.171453	0.38161	0.216167	0.162458	0.0453245	0.210514	0.179021	0.0387667	-0.281368	-3.21399	0.160875	-1.36366	-0.456978	no change	no change	down	no change	down	no change	0.100697	NULL	NULL	NULL
Q9RVQ0	DR_0972	7.66648	7.43696	7.18565	8.20464	12.7681	17.9107	3.63072	7.4886	12.5356	9.74396	16.569	22.2418	10.6164	16.9837	20.4576	28.3888	0.0271434	1.02237	-0.441808	0.80074	0.308955	1.13254	no change	up	no change	no change	no change	up	8.95738e-06	1	1	NULL
Q9RVQ1	DR_0971	0.300951	0.045837	2.1183	1.49253	3.32136	3.70456	4.18201	3.08446	0.0282604	0.168075	3.09981	3.32232	0.943568	0.41688	4.71391	3.97786	3.3802	4.34056	4.38913	5.03166	2.79269	5.46826	up	up	up	up	up	up	5.31527e-09	3	3	sustain_up
Q9RVQ2	DR_0970	0.256466	0.166771	0.647168	0.482871	11.951	20.7898	2.86926	3.17383	0.050706	0.0291633	5.05743	3.62218	2.39498	1.11061	11.0242	7.7519	1.41683	6.27348	3.83575	6.76385	5.45587	7.87704	up	up	up	up	up	up	4.72382e-08	3	3	sustain_up
Q9RVQ3	DR_0969	36.6607	38.4198	28.6716	21.6967	34.9342	34.1624	72.2417	75.2831	40.1095	36.3625	29.7463	38.455	34.8125	38.8227	46.6171	37.5543	-0.575922	-0.119822	0.974448	-0.165134	-0.054537	0.138398	no change	no change	no change	no change	no change	no change	4.19582e-09	0	0	NULL
Q9RVQ4	DR_0968	0.0209996	NULL	NULL	NULL	NULL	NULL	0.0850006	NULL	NULL	NULL	0.0409613	0.0423662	0.126037	0.136957	0.0709611	0.0529477	-4.08808	-4.08808	1.98482	6.03346	7.69163	6.60588	down	down	up	up	up	up	5.78721e-06	1	3	NULL
Q9RVQ5	DR_0967	0.131411	NULL	0.146949	NULL	0.824038	0.456011	0.277434	0.176798	0.0620019	NULL	0.743347	0.728114	0.396466	0.106706	0.624961	0.180299	0.160499	3.27707	1.78237	4.55407	3.00594	3.68434	no change	up	up	up	up	up	1.27787e-05	2	3	sustain_up
Q9RVQ6	DR_0966	0.0118163	0.0196241	0.0905806	0.035071	0.195675	0.0932437	0.110265	0.0934458	0.0913572	0.0111495	0.094185	0.0537239	0.0913436	0.0408008	0.133797	0.091766	1.99873	3.19997	2.69583	0.52899	0.366397	1.13781	up	up	up	no change	no change	up	0.0168158	3	1	NULL
Q9RVQ7	DR_0965	0.13898	0.644043	0.29502	0.360788	0.241036	0.326581	0.182383	0.348331	0.182669	0.527972	0.257046	0.266579	0.420874	0.355155	0.167742	0.258967	-0.255783	-0.464137	-0.561119	-0.440589	0.126988	-0.735868	no change	no change	no change	no change	no change	no change	0.566373	NULL	NULL	NULL
Q9RVQ8	DR_0964	0.913439	0.844559	1.05112	0.629385	0.960255	0.734119	0.20681	0.336051	1.54505	0.911117	1.06996	0.813973	0.808167	0.182165	0.895953	0.416501	-0.0650427	-0.0531814	-1.69528	-0.382663	-1.31042	-0.904141	no change	no change	down	no change	down	no change	0.0239784	0	0	NULL
Q9RVQ9	lysY	4.78509	1.8971	3.98819	3.02414	2.488	2.20401	2.00519	0.927594	3.41727	2.9194	2.57102	2.62773	2.79929	1.41644	3.65645	3.99843	0.0695756	-0.510113	-1.18805	-0.28556	-0.587942	0.272655	no change	no change	down	no change	no change	no change	0.00200927	0	0	NULL
Q9RVR0	DR_0962	2.76694	2.91939	2.2658	2.67317	1.75274	0.977344	1.12855	3.25207	1.8687	1.29372	1.77548	1.17843	1.93322	1.04456	1.79759	1.68181	-0.203289	-1.05855	-0.376363	-0.0984018	-0.0867907	0.137809	no change	down	no change	no change	no change	no change	0.0831302	NULL	NULL	NULL
Q9RVR1	DR_0961	NULL	NULL	NULL	NULL	0.115014	0.00897701	0.0159875	NULL	NULL	NULL	NULL	NULL	0.0255905	NULL	0.0380089	0.0659993	0	6.60683	3.7079	0	4.3657	6.3533	no change	up	up	no change	up	up	0.00995001	2	2	sustain_up
Q9RVR2	DR_0960	0.0994728	0.0184463	0.0163028	NULL	0.311028	0.38709	1.67054	0.745674	NULL	0.164975	1.93917	2.46092	1.37222	1.31957	1.7175	1.27472	-2.79939	2.56567	4.35688	4.73166	4.02269	4.17534	down	up	up	up	up	up	4.39527e-07	2	3	sustain_up
Q9RVR3	DR_0959	0.53415	1.40196	1.06363	1.31711	0.480843	0.427921	2.31459	3.37247	0.366203	0.405128	1.12715	0.995802	1.03462	1.09007	0.886049	0.953947	0.298256	-1.09118	1.55452	1.46065	1.46183	1.25428	no change	down	up	up	up	up	1.43979e-06	1	3	NULL
Q9RVR4	DR_0958	4.86531	1.15694	0.614258	0.0221325	2.6936	1.81281	0.780062	1.17364	3.03924	1.51091	3.71345	2.12557	1.78135	3.30003	4.47285	1.36865	-3.24232	-0.418324	-1.62409	0.359811	0.159305	0.360423	down	no change	down	no change	no change	no change	0.0398689	0	0	NULL
Q9RVR5	DR_0957	3.15312	3.69517	3.96255	3.66198	2.45087	1.65903	3.64636	3.46718	1.8981	1.52891	3.21107	4.01808	2.32354	2.16065	2.22562	2.96156	0.154905	-0.736642	0.0548242	1.07688	0.387898	0.598002	no change	no change	no change	up	no change	no change	9.03042e-05	0	1	NULL
Q9RVR7	DR_0955	NULL	NULL	NULL	NULL	NULL	0.202761	0.0624688	0.170185	NULL	NULL	NULL	0.278174	NULL	NULL	0.0931178	0.0703498	0	7.3209	7.51478	7.77588	0	7.0056	no change	up	up	up	no change	up	0.0319331	2	2	sustain_up
Q9RVR8	DR_0954	5.25503	0.589343	NULL	NULL	0.317933	0.100624	0.882172	0.12558	0.457329	0.0855337	2.09041	0.452453	0.362706	0.327582	0.439808	0.17729	-12.1656	-3.80355	-2.53591	2.22779	0.346611	0.184913	down	down	down	up	no change	no change	0.0108659	0	1	NULL
Q9RVR9	DR_0953	51.9112	96.4453	84.3921	88.2959	23.6823	48.0245	75.2853	94.7792	31.6738	55.6069	50.6463	77.6528	33.9426	50.7753	49.472	61.9166	0.2191	-1.04889	0.197014	0.555777	-0.0429967	0.351867	no change	down	no change	no change	no change	no change	0.0584555	NULL	NULL	NULL
Q9RVS0	DR_0952	33.1329	36.879	41.7882	30.184	29.5618	23.163	31.1318	24.5507	30.1397	24.0317	36.2953	27.848	23.3503	24.6523	30.192	26.8299	0.0398422	-0.409116	-0.330375	0.243767	-0.174418	0.0739844	no change	no change	no change	no change	no change	no change	0.201137	NULL	NULL	NULL
Q9RVS1	DR_0951	45.5877	41.1092	51.1945	54.7898	10.238	5.8203	27.5105	36.9543	20.1698	26.2186	27.9189	27.7959	19.8398	26.5709	27.711	25.0939	0.289798	-2.43266	-0.427471	0.264296	0.000690125	0.186906	no change	down	no change	no change	no change	no change	2.5291e-09	0	0	NULL
Q9RVS2	DR_0950	43.9119	62.3727	57.927	75.2006	44.9098	57.3988	41.9469	70.9692	55.0575	49.6168	48.4812	55.7254	42.768	66.5401	38.3657	44.1585	0.324876	-0.0550053	0.0873179	-0.00646066	0.062492	-0.343019	no change	no change	no change	no change	no change	no change	0.175074	NULL	NULL	NULL
Q9RVS4	DR_0948	NULL	NULL	1.37956	NULL	NULL	NULL	0.0732677	0.760675	NULL	NULL	0.646696	0.0294622	NULL	0.525895	NULL	0.74684	10.0834	0	9.35655	9.05396	8.69312	9.19863	up	no change	up	up	up	up	0.487004	NULL	NULL	NULL
Q9RVS5	DR_0947	NULL	0.141596	1.79013	1.39706	1.77815	1.44705	0.590715	0.0835874	0.348982	0.65678	0.65478	2.77279	2.59285	0.354911	0.0908188	1.77797	4.48596	4.50307	2.24515	1.7689	1.55133	0.893812	up	up	up	up	up	no change	0.75739	NULL	NULL	NULL
Q9RVS6	DR_0946	1.11442	0.66344	1.19025	1.72308	0.72024	0.798157	0.180839	0.164542	0.945179	0.74292	0.428223	0.83248	0.686784	0.455962	0.174435	0.347356	0.712522	-0.227595	-2.36388	-0.421171	-0.562894	-1.69386	no change	no change	down	no change	no change	down	0.000569996	0	0	NULL
Q9RVS8	DR_0944	0.0669985	0.411398	0.524519	0.973427	12.6269	7.75207	0.467661	0.901564	0.53123	0.518259	10.6091	10.4802	0.510727	0.757033	10.729	7.41418	1.64671	5.41273	1.51708	4.32875	0.272596	4.11167	up	up	up	up	no change	up	8.03801e-11	3	2	sustain_up
Q9RVT0	trpA	0.172385	0.212268	0.694566	0.971071	3.14368	2.9581	1.13677	2.69827	0.171936	0.233011	0.829551	1.99988	0.282092	0.359667	1.8306	1.86926	2.11444	3.9876	3.31761	2.80471	0.664299	3.19167	up	up	up	up	no change	up	1.78469e-06	3	2	sustain_up
Q9RVT1	trpB	1.41148	0.811935	3.47917	3.50033	6.72917	3.10553	2.90427	2.16452	0.638058	0.677942	2.07844	1.52909	1.58348	1.47019	1.75231	1.28945	1.65035	2.1451	1.18886	1.45485	1.21438	1.20875	up	up	up	up	up	up	0.00963514	3	3	sustain_up
Q9RVT2	DR_0940	1.17109	1.30184	0.0771375	0.153544	0.150128	0.0867262	1.21779	1.23884	0.897141	1.21394	0.547004	0.556305	1.25829	2.20009	0.754886	0.545057	-3.42225	-3.38415	-0.00954697	-0.936146	0.712114	-0.699535	down	down	no change	no change	no change	no change	9.15803e-08	0	0	NULL
Q9RVT3	rex	1.23718	0.733297	1.11267	0.266132	0.649844	0.542006	1.41866	1.52914	1.50555	0.996822	0.444031	0.408359	0.704205	0.945692	0.678683	0.849495	-0.515128	-0.725342	0.581096	-1.55371	-0.600921	-0.711484	no change	no change	no change	down	no change	no change	0.00219342	0	0	NULL
Q9RVT4	DR_0938	2.80659	2.88833	2.39143	2.45587	1.22915	0.987589	4.13858	5.82627	3.47128	2.88269	1.91211	1.83852	2.33323	1.93147	3.01945	2.5966	-0.232494	-1.36123	0.807173	-0.760526	-0.575217	-0.178106	no change	down	no change	no change	no change	no change	2.56283e-06	0	0	NULL
Q9RVT5	DR_0937	3.21067	3.2037	2.06888	2.23541	1.23878	1.04583	5.46674	5.163	1.84433	1.58862	2.17361	1.67366	2.4982	2.04444	1.97699	1.51106	-0.575533	-1.48936	0.728726	0.16439	0.404082	0.0229708	no change	down	no change	no change	no change	no change	4.05473e-13	0	0	NULL
Q9RVT6	rlmN	0.683945	0.553497	0.443046	0.49947	0.505796	0.552031	0.309146	0.409192	0.252254	0.337407	0.824229	0.709177	0.759646	0.742967	0.427209	0.137998	-0.392772	-0.226258	-0.784626	1.37878	1.34952	-0.0611049	no change	no change	no change	up	up	no change	1.16508e-06	0	2	late_up
Q9RVT7	DR_0935	0.0417424	0.157894	0.120566	NULL	0.223701	0.151256	0.0515699	0.268631	0.0684538	0.0264486	0.189286	NULL	0.227734	0.138171	0.206928	NULL	-0.719959	0.909347	0.681599	1.00089	1.94695	1.12904	no change	no change	no change	up	up	up	0.668769	NULL	NULL	NULL
Q9RVT8	DR_0934	NULL	NULL	0.706648	1.16548	0.447498	0.485606	0.599862	0.587382	0.252691	0.387351	0.427182	0.648322	0.489813	0.413523	0.52055	0.419048	10.5232	9.51864	9.86614	0.748775	0.497096	0.553876	up	up	up	no change	no change	no change	8.58613e-05	3	0	early_up
Q9RVT9	DR_0933	0.0982122	0.175253	0.179056	0.18756	0.0889157	0.0437541	0.295911	0.0493407	0.150013	0.129479	0.0457518	0.119307	0.0520418	0.0535046	0.0577671	0.0428422	0.422912	-1.04352	0.33629	-0.75982	-1.40493	-1.47404	no change	down	no change	no change	down	down	0.0972886	NULL	NULL	NULL
Q9RVU0	DR_0932	1.01428	2.97913	0.0760496	0.585145	1.60575	0.320206	0.870066	0.165209	4.77669	0.625433	2.85977	3.35915	2.10051	1.80191	1.91001	2.35082	-2.59448	-1.05205	-1.94761	0.203137	-0.469157	-0.342394	down	down	down	no change	no change	no change	0.208804	NULL	NULL	NULL
Q9RVU2	DR_0930	4.97953	4.7301	3.36808	2.7866	3.08586	2.15639	4.87721	5.41693	2.25697	2.73449	3.44687	3.63554	4.51478	2.53449	4.62967	3.64961	-0.657731	-0.889231	0.0843356	0.504779	0.498011	0.730041	no change	no change	no change	no change	no change	no change	4.85832e-05	0	0	NULL
Q9RVU3	acyP	3.22952	4.965	1.93183	2.26522	1.51408	1.97621	0.164763	1.20731	2.40611	3.25687	0.718854	0.864348	1.54314	1.27014	0.535746	1.02708	-0.965285	-1.23132	-2.5783	-1.83872	-1.00931	-1.85741	no change	down	down	down	down	down	0.0220617	0	0	NULL
Q9RVU4	DR_0928	0.238648	0.297322	0.103553	0.0596562	0.0165913	0.123838	0.022988	NULL	0.192995	0.0488633	0.0939649	0.119865	0.0876814	0.07502	0.117471	0.152196	-1.71542	-1.93231	-4.50382	-0.1777	-0.571938	0.15702	down	down	down	no change	no change	no change	6.76767e-05	0	0	NULL
Q9RVU5	DR_0927	0.249716	1.18086	1.16543	1.06603	0.0579869	NULL	0.251013	0.766704	0.113969	0.0854908	NULL	NULL	NULL	0.371192	0.122698	0.152004	0.641389	-4.60899	-0.49126	-7.2927	0.898535	0.461767	no change	down	no change	down	no change	no change	0.000477482	0	0	NULL
Q9RVU6	DR_0926	1.05122	1.0106	0.27851	0.433699	1.03469	0.483697	1.94508	1.34281	0.953872	1.15173	2.29087	0.875134	1.73596	0.659727	2.28002	1.00173	-1.53355	-0.441377	0.673245	0.588429	0.186204	0.640232	down	no change	no change	no change	no change	no change	0.0695206	NULL	NULL	NULL
Q9RVU8	DR_0924	0.132283	NULL	3.00825	1.73647	1.33048	0.982926	0.875293	0.392426	0.598412	0.0779702	1.45336	0.479602	0.820495	0.404771	1.12048	0.900513	5.15771	4.1214	3.25362	1.5149	0.857184	1.57915	up	up	up	up	no change	up	0.000717278	3	2	sustain_up
Q9RVU9	DR_0923	0.043936	NULL	0.0374524	NULL	0.133404	0.491187	0.152158	0.0602235	NULL	NULL	0.28027	0.313357	NULL	NULL	0.545044	0.317089	-0.226785	3.8087	2.25244	8.86616	0	9.40451	no change	up	up	up	no change	up	6.88307e-06	2	2	sustain_up
Q9RVV0	DR_0922	5.85745	3.36661	5.94358	4.54641	6.43136	6.43056	10.4696	10.9937	2.7078	2.6855	4.24701	4.63821	6.9341	4.20796	4.10919	5.68246	0.185539	0.479632	1.2184	0.720239	1.04678	0.860384	no change	no change	up	no change	up	no change	7.44398e-05	1	1	NULL
Q9RVV1	DR_0921	0.976467	1.1252	0.397677	0.537917	0.585679	0.575604	0.568195	0.689593	1.09733	0.27887	0.429703	0.347087	0.758091	0.234791	0.796082	0.591403	-1.16758	-0.855811	-0.740643	-0.825094	-0.470999	0.0117804	down	no change	no change	no change	no change	no change	0.262061	NULL	NULL	NULL
Q9RVV2	DR_0920	0.751333	15.8764	7.16707	6.73868	0.438319	42.4983	2.29015	72.9104	0.316235	2.86734	1.23404	76.85	33.2823	26.1301	0.43857	44.0409	-0.257913	1.36862	2.17715	4.61631	4.22205	3.80442	no change	up	up	up	up	up	0.275349	NULL	NULL	NULL
Q9RVV3	DR_0919	NULL	0.0180643	NULL	0.0337718	NULL	0.0124253	NULL	NULL	NULL	NULL	NULL	NULL	NULL	0.0118071	NULL	NULL	0.879672	-0.517763	-3.87774	0	3.29002	0	no change	no change	down	no change	up	no change	0.186154	NULL	NULL	NULL
Q9RVV4	DR_0918	0.624098	0.68171	0.0707085	0.0925432	0.535521	0.863443	0.672726	0.737095	0.442008	0.781702	0.368332	0.342675	0.424592	0.529931	0.750783	0.565242	-2.99977	0.0994155	0.110569	-0.783327	-0.358409	0.104925	down	no change	no change	no change	no change	no change	0.00252049	0	0	NULL
Q9RVV5	DR_0917	0.248726	NULL	0.0695113	0.0586434	NULL	0.0507344	0.071988	0.0523016	NULL	NULL	0.118217	0.0450161	0.0230258	0.0290054	0.0316267	NULL	-0.960358	-2.27923	-1.00454	7.00354	5.35405	4.66454	no change	down	down	up	up	up	0.0796641	NULL	NULL	NULL
Q9RVV7	DR_0914	0.682944	1.16611	0.538684	0.957379	1.72908	1.43585	0.741632	0.0797588	1.41254	2.51794	0.839316	0.481434	1.89286	2.28229	0.882262	0.905249	-0.305618	0.775387	-1.17065	-1.57335	0.0871199	-1.13676	no change	no change	down	down	no change	down	0.0229173	0	0	NULL
Q9RVV8	DR_0913	NULL	0.0128227	NULL	NULL	0.0255284	NULL	NULL	NULL	NULL	NULL	NULL	NULL	0.011446	NULL	0.146049	0.220959	-3.40322	0.959065	-3.40322	0	3.24753	8.17241	down	no change	down	no change	up	up	3.57089e-09	0	2	late_up
Q9RVV9	rpoB	19.9423	23.6702	32.0167	28.1965	28.3521	27.8178	28.5842	33.0227	20.0307	23.8267	22.647	28.4382	16.7689	17.3166	17.0672	19.4627	0.46534	0.365055	0.498351	0.220084	-0.363662	-0.263741	no change	no change	no change	no change	no change	no change	4.19046e-05	0	0	NULL
Q9RVW0	rpoC	4.383	3.45293	9.37131	6.04645	15.6682	13.3958	12.9073	13.2119	3.57002	3.55433	7.19094	7.79654	5.24633	5.02637	12.4424	10.4236	0.976416	1.89105	1.73693	1.07293	0.527984	1.68237	no change	up	up	up	no change	up	7.62244e-08	2	2	sustain_up
Q9RVW2	DR_0909	6.28457	9.04234	3.92303	4.34759	4.76464	7.60116	7.77065	18.3529	6.2012	9.53469	5.93389	9.5419	7.77405	7.92639	8.94569	11.1252	-0.890001	-0.309711	0.769281	-0.0240457	-0.0032539	0.351046	no change	no change	no change	no change	no change	no change	0.106372	NULL	NULL	NULL
Q9RVW4	DR_0907	0.0293889	7.99429	3.61049	3.77976	23.3096	2.12694	1.16371	1.30291	0.592031	1.25615	0.426222	1.09306	0.84062	0.809543	17.8018	13.6686	-0.118642	1.66456	-1.70173	-0.282718	-0.163498	4.08982	no change	up	down	no change	no change	up	0.000350564	1	1	NULL
Q9RVW5	DR_0906	22.1353	16.2136	23.2337	18.6596	16.4743	13.406	20.867	20.7417	20.6738	24.3924	21.0978	17.7313	15.0985	14.7894	14.8712	14.281	0.127533	-0.359987	0.117701	-0.21491	-0.592486	-0.628443	no change	no change	no change	no change	no change	no change	0.00142554	0	0	NULL
Q9RVW7	DR_0904	NULL	NULL	NULL	NULL	0.724114	0.882022	0.113896	0.0896613	NULL	0.0342492	0.207136	0.17119	0.114615	0.0691656	0.727551	0.710488	0	10.3021	7.32204	3.43894	2.3973	5.36534	no change	up	up	up	up	up	6.41963e-16	2	3	sustain_up
Q9RVW8	DR_0903	0.498359	0.649358	0.0728133	NULL	0.270573	0.21041	0.0708966	1.2233	0.0401643	0.12068	0.509985	0.430997	0.565086	0.350048	0.498944	0.259232	-3.96587	-1.25471	0.173284	2.5485	2.50832	2.23687	down	down	no change	up	up	up	0.00640123	0	3	late_up
Q9RVW9	DR_0902	3.21368	2.67654	0.435742	0.404012	0.0717967	1.00933	3.04101	3.10716	0.167243	1.95586	0.838036	1.34304	0.805598	0.664162	1.10223	1.22736	-2.81028	-2.44579	0.0618344	0.0388621	-0.530594	0.133896	down	down	no change	no change	no change	no change	1.59408e-05	0	0	NULL
Q9RVX0	rbfA	NULL	NULL	0.043987	NULL	0.445	0.0759896	0.260924	0.360939	NULL	NULL	0.233778	0.141235	0.160128	0.00462236	0.458257	0.20582	5.13246	8.67785	8.9332	8.20354	7.01688	9.02795	up	up	up	up	up	up	0.0291302	3	3	sustain_up
Q9RVX1	DR_0900	NULL	NULL	NULL	NULL	NULL	NULL	0.0380335	0.0919849	NULL	NULL	0.111046	0.162801	0.0572658	0.0260941	0.107642	0.109413	0	0	6.67532	7.74997	6.03403	7.41466	no change	no change	up	up	up	up	3.49998e-06	1	3	NULL
Q9RVX2	rnhA	0.0343074	NULL	0.53302	0.512065	0.355545	0.375707	0.0527074	0.259081	0.505954	0.217612	0.0343951	0.468276	1.1542	0.675951	0.183194	0.334716	4.90245	4.38727	3.15747	-0.525511	1.33876	-0.482426	up	up	up	no change	up	no change	0.000460228	3	1	NULL
Q9RVX3	DR_0898	2.14767	2.63413	2.43861	1.77659	3.19898	0.78905	3.14777	3.14937	0.904879	1.55548	2.1516	1.98407	1.9543	1.10014	2.58175	2.23144	-0.181955	-0.26188	0.39714	0.749253	0.312041	0.968126	no change	no change	no change	no change	no change	no change	0.288037	NULL	NULL	NULL
Q9RVX4	DR_0897	0.400118	0.494835	0.56675	0.374685	NULL	0.217474	0.540563	0.633315	0.127798	0.142278	0.236979	0.304624	0.282137	0.100979	0.411648	0.279012	0.0730519	-2.03675	0.391401	1.00387	0.504422	1.35461	no change	down	no change	up	no change	up	0.000902936	0	2	late_up
Q9RVX5	DR_0896	0.0163485	NULL	NULL	NULL	0.0476998	NULL	0.130702	0.0963381	0.0129189	NULL	0.0657142	0.0231028	1.40447	0.809223	0.115998	0.320208	-3.7389	1.50887	3.74065	2.71201	7.35148	5.00811	down	up	up	up	up	up	5.23081e-07	2	3	sustain_up
Q9RVX7	DR_0894	0.144777	0.0426874	2.5597	2.25918	2.01005	2.96941	2.8771	4.13716	0.254967	0.144485	2.22688	4.17049	3.28495	0.985774	5.13655	3.38472	4.68401	4.7313	5.22561	4.00139	3.41839	4.41498	up	up	up	up	up	up	0.424479	NULL	NULL	NULL
Q9RVX8	DR_0893	4.86637	6.37069	3.14094	8.35039	5.26314	7.10876	3.9741	4.38664	2.04497	2.08171	6.85036	8.6349	2.8243	2.39051	2.4014	3.24428	0.0322793	0.138802	-0.426564	1.90784	0.337633	0.452166	no change	no change	no change	up	no change	no change	0.00103066	0	1	NULL
Q9RVY0	DR_0891	NULL	NULL	0.0528482	0.0414273	0.0773571	0.074418	0.0155409	0.0247708	NULL	NULL	NULL	NULL	NULL	NULL	NULL	NULL	6.21156	6.89853	4.98587	0	0	0	up	up	up	no change	no change	no change	2.49039e-13	3	0	early_up
Q9RVY1	dtd	NULL	1.63053	NULL	1.4382	1.75872	1.00224	NULL	NULL	0.161263	0.0870121	NULL	0.404131	NULL	0.860774	NULL	NULL	-0.180998	0.759267	-10.3244	0.705149	1.79476	-7.60854	no change	no change	down	no change	up	down	0.32599	NULL	NULL	NULL
Q9RVY3	DR_0888	58.0131	40.9046	82.424	79.4921	108.614	109.672	18.6553	25.6557	130.079	176.195	134.662	181.327	70.5558	130.762	67.8805	72.4989	0.710945	1.14192	-1.15857	0.0450492	-0.605347	-1.12549	no change	up	down	no change	no change	down	0.000126424	1	0	NULL
Q9RVY4	DR_0887	3.42138	4.69918	NULL	0.887965	NULL	0.722993	NULL	0.894456	5.13643	4.82734	NULL	0.487244	NULL	1.68918	NULL	NULL	-3.19197	-3.48826	-3.18147	-4.35209	-2.55983	-12.9352	down	down	down	down	down	down	0.0785926	NULL	NULL	NULL
Q9RVY5	DR_0886	1.24708	1.986	1.5527	0.0534958	0.81034	1.0506	1.45217	2.4813	0.733782	0.98718	0.915996	1.15477	0.740489	1.11996	0.835118	1.74024	-1.00926	-0.796876	0.282896	0.266951	0.11244	0.581559	down	no change	no change	no change	no change	no change	0.113904	NULL	NULL	NULL
Q9RVY7	DR_0884	2.15074	1.39632	0.0961787	3.07633	2.58978	2.83065	1.57819	1.34845	0.155746	0.377474	1.22652	2.17809	1.33368	0.948969	2.39788	1.73783	-0.160995	0.611786	-0.277378	2.67469	2.09791	2.95533	no change	no change	no change	up	up	up	0.00946996	0	3	late_up
Q9RVY8	DR_0882	NULL	1.34901	1.64766	NULL	1.13821	NULL	3.19065	5.50713	NULL	0.650052	1.16997	0.663766	1.66979	1.19685	1.43621	1.43946	0.288393	-0.24501	2.68807	1.49475	2.13932	2.14386	no change	no change	up	up	up	up	0.000436734	1	3	NULL
Q9RVY9	DR_0881	5.67655	1.47523	4.6411	4.40501	7.94061	5.58236	0.918989	1.02686	NULL	NULL	4.28703	1.16366	2.56175	0.595149	NULL	6.93863	0.338995	0.919038	-1.8779	12.065	11.277	12.4133	no change	no change	down	up	up	up	0.00540467	0	3	late_up
Q9RVZ0	DR_0880	4.71428	4.24618	2.24814	1.95789	2.22727	2.23056	6.44095	6.39198	2.65851	3.81838	2.9531	2.92655	3.4648	3.86365	2.95924	3.11654	-1.09111	-1.00723	0.518206	-0.139571	0.178207	-0.0922314	down	down	no change	no change	no change	no change	2.57933e-11	0	0	NULL
Q9RVZ2	DR_0878	NULL	NULL	NULL	NULL	0.423162	0.717596	0.104665	0.345071	NULL	NULL	0.431304	0.0888617	0.185579	0.374988	1.12308	0.72414	0	9.80852	8.46568	8.67557	8.78349	10.5039	no change	up	up	up	up	up	1.88086e-05	2	3	sustain_up
Q9RVZ3	DR_0877	43.7587	2.96941	70.4352	59.6673	43.3548	29.0042	24.3446	29.0735	32.9014	21.652	28.2155	35.9933	16.9161	12.4341	29.085	28.4309	1.47728	0.63088	0.193036	0.235102	-0.8943	0.0762955	up	no change	no change	no change	no change	no change	0.00305628	1	0	NULL
Q9RVZ4	DR_0876	18.3371	14.6891	9.48721	10.767	13.0718	15.7527	6.29376	8.49797	10.514	8.79549	10.2077	9.14356	10.8744	7.95636	14.2922	13.0699	-0.705386	-0.196311	-1.15882	0.00311482	-0.0362198	0.502866	no change	no change	down	no change	no change	no change	1.16486e-07	0	0	NULL
Q9RVZ5	DR_0875	1.2191	1.12513	1.28892	1.47287	0.896623	0.569142	2.33558	1.90127	1.09115	0.312102	1.37435	1.75205	0.808032	0.670077	0.739179	1.13146	0.236497	-0.677457	0.85388	1.15573	0.0749769	0.414758	no change	no change	no change	up	no change	no change	9.03801e-05	0	1	NULL
Q9RVZ7	DR_0873	0.49552	0.401563	0.463941	0.643003	0.142193	0.0298722	0.44172	0.156135	0.381227	0.288905	0.342142	0.261701	0.304787	3.48318	0.335397	0.17616	0.303268	-2.38229	-0.585446	-0.150273	2.49891	-0.38955	no change	down	no change	no change	up	no change	0.0187065	0	1	NULL
Q9RW01	purH	3.69841	3.01808	1.78974	1.07251	2.82595	3.29669	4.10899	2.94838	5.29571	3.63732	2.44447	2.22485	5.58866	3.28984	5.10548	3.11801	-1.23056	-0.133554	0.0714238	-0.935938	-0.00883479	-0.119401	down	no change	no change	no change	no change	no change	0.77541	NULL	NULL	NULL
Q9RW02	folD	0.0718876	3.67838	0.0549421	0.0845933	0.35518	1.17904	0.476308	0.169067	0.137717	0.12448	3.76916	0.0166453	3.99283	0.0311961	3.2321	1.39455	-4.74829	-1.28949	-2.53878	3.85188	3.93992	4.14125	down	down	down	up	up	up	0.0557568	NULL	NULL	NULL
Q9RW03	DR_0866	0.450004	43.4928	0.236803	0.370225	0.245687	0.386098	0.224084	0.53836	0.0450389	0.169846	0.344543	0.123291	0.641959	0.368003	0.139213	0.200438	-6.17772	-6.12005	-5.84885	1.12243	2.23266	0.660487	down	down	down	up	up	no change	0.0569874	NULL	NULL	NULL
Q9RW05	DR_0864	18.2853	15.1363	50.708	34.357	54.2763	45.5166	26.4483	49.0661	14.7304	13.9178	54.4203	67.5716	29.9017	26.6344	64.1614	66.2377	1.34779	1.57816	1.17597	2.09027	0.980729	2.18642	up	up	up	up	no change	up	6.42807e-06	3	2	sustain_up
Q9RW06	DR_0863	38.7712	53.3012	54.192	47.947	41.9682	46.6329	53.6067	58.0126	19.3116	19.0265	22.0939	29.8741	12.8689	15.4751	26.2156	41.5945	0.149693	-0.0554449	0.277746	0.438842	-0.435733	0.822722	no change	no change	no change	no change	no change	no change	0.43919	NULL	NULL	NULL
Q9RW07	DR_0862	0.273566	0.0183606	0.0375251	0.0173471	0.0810733	0.00648711	0.175593	NULL	0.152676	0.162997	0.219326	0.107302	0.168604	0.134711	0.158918	0.11522	-2.41146	-1.73726	-0.728158	0.0492197	-0.0576132	-0.203526	down	down	no change	no change	no change	no change	0.311933	NULL	NULL	NULL
Q9RW08	DR_0861	13.9994	0.733977	0.967089	1.11373	0.623488	0.637181	8.15303	1.07623	0.794432	0.691933	13.2441	0.553504	0.524835	0.951007	0.60384	0.390535	-2.82386	-3.54682	-0.674797	3.21456	-0.0102501	-0.579927	down	down	no change	up	no change	no change	0.0340572	0	1	NULL
Q9RW09	DR_0860	0.014268	0.258085	0.749399	0.334354	0.647543	0.210663	1.29991	2.14677	0.373398	0.627368	0.356053	0.571399	0.230618	0.544238	0.0603234	0.410654	1.99249	1.65585	3.66166	-0.109761	-0.369106	-1.08738	up	up	up	no change	no change	down	7.61662e-06	3	0	early_up
Q9RW10	DR_0859	24.4208	18.012	39.9284	44.6404	24.3332	34.0339	18.4639	22.6663	40.2226	27.9727	29.6046	30.1584	10.4546	13.8911	28.9734	17.0007	0.994946	0.459978	-0.0449797	-0.19042	-1.48601	-0.568853	no change	no change	no change	no change	down	no change	1.6922e-05	0	0	NULL
Q9RW13	DR_0856	0.65844	0.703867	0.488919	0.3588	0.939231	0.447823	1.22785	2.99804	0.87076	0.420841	1.229	0.802451	0.720342	0.545876	1.69478	0.984584	-0.684394	0.0259722	1.6332	0.65335	-0.028635	1.05273	no change	no change	up	no change	no change	up	0.0412666	1	1	NULL
Q9RW14	DR_0855	0.00733779	0.014006	NULL	0.0181774	0.0689533	0.0381508	0.0344833	NULL	0.0171057	NULL	0.0587425	NULL	0.0684305	0.0330243	0.0631928	0.0191472	-0.182049	2.32713	0.718452	1.7428	2.51562	2.21445	no change	up	no change	up	up	up	0.410494	NULL	NULL	NULL
Q9RW15	DR_0854	0.21118	0.0624645	0.679751	0.764741	49.76	0.856576	1.93959	2.05652	0.132672	0.064256	0.992956	0.516041	0.520554	0.0150847	1.52179	0.656171	2.40019	7.53116	3.86822	2.93785	1.44359	3.46724	up	up	up	up	up	up	0.0577781	NULL	NULL	NULL
Q9RW16	DR_0853	1.80385	1.76755	4.08966	11.4759	3.20656	4.3442	3.00788	3.5361	1.63127	0.758562	2.70901	2.47231	2.71928	2.87472	2.3017	2.61028	2.1238	1.08013	0.87368	1.11641	1.22697	1.03939	up	up	no change	up	up	up	0.0248038	2	3	sustain_up
Q9RW18	DR_0851	5.49094	2.84191	4.28843	2.74464	2.30146	1.76192	4.24849	4.27644	2.42048	1.39092	3.23872	2.62301	3.2685	2.54556	2.11065	3.29294	-0.244654	-1.03613	0.0328771	0.621006	0.609223	0.503596	no change	down	no change	no change	no change	no change	0.0036566	0	0	NULL
Q9RW19	DR_0850	0.359927	0.506504	0.20954	0.179544	NULL	NULL	0.112329	0.060302	0.494709	0.229604	0.217037	0.164045	0.508519	0.0489011	0.0909718	0.0369109	-1.15501	-9.41169	-2.3274	-0.926513	-0.377848	-2.50179	down	down	down	no change	no change	down	0.0307544	0	0	NULL
Q9RW20	DR_0849	0.0669455	0.138259	NULL	0.281362	0.755158	0.389917	NULL	NULL	NULL	0.0948684	0.119974	0.0973433	0.0944988	0.0532209	0.0676523	0.0918575	0.458624	2.48031	-7.33366	1.18617	0.629222	0.740004	no change	up	down	up	no change	no change	0.000113775	1	1	NULL
Q9RW21	DR_0848	1.107	0.948685	0.680024	0.713934	1.78185	0.996438	1.03267	1.27325	2.39827	3.14831	0.915996	1.24946	1.82279	1.77797	1.70291	2.15364	-0.560432	0.434577	0.165719	-1.35693	-0.623294	-0.524287	no change	no change	no change	down	no change	no change	0.000200585	0	0	NULL
Q9RW22	DR_0847	5.33261	5.18324	4.22562	5.97328	4.53196	5.38848	7.64921	4.77945	3.8191	4.25869	6.3429	5.39917	4.11498	6.037	5.65654	4.33844	-0.0441518	-0.0840888	0.241105	0.539654	0.329729	0.307243	no change	no change	no change	no change	no change	no change	0.0909119	NULL	NULL	NULL
Q9RW23	DR_0846	0.340447	0.296778	3.90958	3.12381	1.63996	0.752001	2.31294	3.28791	6.44591	6.31411	3.0036	4.48365	6.31344	3.56973	2.74343	2.81791	3.46434	1.90832	3.13577	-0.769122	-0.368584	-1.19813	up	up	up	no change	no change	down	3.54027e-07	3	0	early_up
Q9RW24	rpiA	13.4074	11.8222	11.2153	9.2293	5.42482	7.80018	2.04827	4.12648	11.8738	19.5836	5.55809	5.80873	6.64451	4.08048	3.27264	5.57827	-0.303396	-0.931848	-2.03066	-1.46857	-1.55242	-1.8295	no change	no change	down	down	down	down	0.00591688	0	0	NULL
Q9RW25	DR_0844	1.72332	1.41711	1.31894	1.00552	0.392596	1.27337	2.07371	1.93112	1.38114	1.5784	2.1594	1.57071	1.41359	1.44066	1.97439	1.52601	-0.434071	-0.914606	0.350777	0.333845	-0.0522602	0.242149	no change	no change	no change	no change	no change	no change	0.00316329	0	0	NULL
Q9RW26	DR_0843	2.13807	2.57765	2.21529	2.15642	3.15519	4.32951	2.08516	2.90426	7.18557	4.95247	2.33213	2.78033	6.17371	4.43095	2.89904	1.70092	-0.109283	0.666466	0.0813929	-1.24745	-0.194837	-1.39984	no change	no change	no change	down	no change	down	0.000223879	0	0	NULL
Q9RW27	DR_0842	NULL	NULL	0.150809	0.0822378	NULL	0.051645	NULL	NULL	0.055957	0.0246231	NULL	NULL	0.0374561	0.0123785	0.024215	0.0206085	7.51722	5.36096	0	-5.9851	-0.693276	-0.846167	up	up	no change	down	no change	no change	2.0596e-06	2	0	early_up
Q9RW28	DR_0841	0.92092	0.0352641	0.237514	0.643151	0.0486597	0.262147	0.0611391	0.167699	0.0825637	0.414906	0.096214	0.302822	0.0788403	0.0199109	0.0436288	0.366692	-0.118696	-1.62127	-2.06296	-0.318088	-2.33274	-0.277856	no change	down	down	no change	down	no change	0.463404	NULL	NULL	NULL
Q9RW29	DR_0840	0.0353495	0.802012	0.0280079	0.0213346	NULL	0.0336256	2.18689	1.86656	0.0408889	0.022664	0.129727	NULL	0.620053	NULL	0.133498	0.0198285	-4.08495	-4.61118	2.27523	1.03651	3.28784	1.27058	down	down	up	up	up	up	5.92862e-08	1	3	NULL
Q9RW31	DR_0838	0.156304	0.18504	0.163859	0.249879	0.327308	0.131923	0.335944	0.808373	0.368429	NULL	0.487053	0.183815	NULL	0.169733	0.253854	0.0704315	0.277485	0.427991	1.74519	0.862155	-1.11521	-0.186611	no change	no change	up	no change	down	no change	0.0157146	1	0	NULL
Q9RW32	DR_0837	2.22243	1.91198	1.56314	2.44395	0.882954	0.938496	1.49948	2.03191	3.94523	3.73746	1.08236	2.70354	1.41508	1.48294	2.42665	1.95894	-0.0451265	-1.18259	-0.227443	-1.02097	-1.40654	-0.808838	no change	down	no change	down	down	no change	0.00233499	0	0	NULL
Q9RW33	DR_0836	0.485842	0.402406	0.612946	0.604365	0.257007	0.0995998	0.4378	0.638561	0.612381	0.83034	0.610998	1.14871	0.603399	0.626199	0.908213	0.875723	0.454663	-1.31663	0.277127	0.28654	-0.230606	0.306271	no change	down	no change	no change	no change	no change	0.563262	NULL	NULL	NULL
Q9RW36	DR_0833	0.0376579	NULL	NULL	NULL	0.11013	0.028294	0.0546981	0.148076	0.0376639	0.0438624	0.0584144	0.0201299	0.174477	NULL	0.0752167	0.031716	-4.91179	1.8539	2.40468	-0.0537604	1.10295	0.391364	down	up	up	no change	up	no change	0.284839	NULL	NULL	NULL
Q9RW37	DR_0832	0.411681	0.212635	0.0318292	NULL	0.139765	0.397261	0.88859	0.00233168	1.41103	1.33871	0.342298	0.205945	0.903092	0.872882	0.521569	0.863801	-4.26531	-0.217286	0.513022	-2.32641	-0.630689	-0.989028	down	no change	no change	down	no change	no change	0.0034484	0	0	NULL
Q9RW38	DR_0831	12.1762	13.622	5.72983	6.76334	5.63898	8.32966	11.7186	14.4757	5.26506	4.31032	2.22236	1.13026	7.40557	3.81833	8.0169	7.65816	-1.04613	-0.885079	0.0219831	-1.51404	0.229172	0.711068	down	no change	no change	down	no change	no change	0.000345618	0	0	NULL
Q9RW41	DR_0828	1.59903	1.14851	1.45577	0.837983	1.477	1.52791	0.559048	0.476303	1.12537	0.89419	1.02829	0.939605	1.17486	0.593111	1.13903	1.21942	-0.26043	0.129177	-1.40802	-0.0373849	-0.191945	0.223797	no change	no change	down	no change	no change	no change	7.28348e-05	0	0	NULL
Q9RW42	DR_0827	0.393303	0.234045	NULL	NULL	0.298678	0.313994	0.421506	0.221418	1.01663	1.0691	0.0986353	0.326894	4.05977	1.84407	0.945258	0.511938	-8.94586	-0.0341504	0.0353827	-2.29322	1.5011	-0.517359	down	no change	no change	down	up	no change	0.000285638	0	1	NULL
Q9RW43	DR_0826	0.340718	0.81445	0.110163	0.304417	0.760884	0.3825	0.46989	0.538066	1.64168	0.661636	0.0444751	0.617926	1.62161	1.25496	0.224742	0.33292	-1.47838	-0.0147932	-0.196671	-1.79793	0.320636	-2.04625	down	no change	no change	down	no change	down	0.00590785	0	0	NULL
Q9RW44	rpmE	145.436	193.863	16.7417	2.48568	113.49	92.1458	NULL	9.95833	132.762	110.267	111.378	123.26	70.1321	44.9249	27.3032	40.9968	-4.14132	-0.722467	-5.09042	-0.05069	-1.07878	-1.83117	down	no change	down	no change	down	down	8.99199e-09	0	0	NULL
Q9RW45	DR_0824	1.90958	1.30714	0.866882	0.654906	1.98771	1.99427	0.998463	0.993676	1.29586	1.0556	1.15856	0.928267	1.63308	0.894541	0.92523	0.671163	-1.07983	0.307893	-0.691274	-0.172247	0.10422	-0.558744	down	no change	no change	no change	no change	no change	0.00204486	0	0	NULL
Q9RW46	DR_0823	5.70383	9.57045	5.30314	9.16452	8.31925	6.75736	3.0676	3.05172	7.10668	4.86405	4.229	6.10866	5.1999	3.20328	4.99721	4.11895	-0.0782724	-0.0187913	-1.31966	-0.211602	-0.510503	-0.393012	no change	no change	down	no change	no change	no change	0.0188304	0	0	NULL
Q9RW47	DR_0822	0.125468	0.11097	NULL	NULL	0.778342	0.430161	0.208166	0.0320398	NULL	0.0757847	0.225605	0.256761	1.53216	0.948889	0.998568	0.820851	-7.53806	2.35369	0.0228154	2.65809	5.02084	4.57337	down	up	no change	up	up	up	9.85943e-05	1	3	NULL
Q9RW48	DR_0821	0.584355	1.00109	1.96539	0.610799	0.0360766	1.76676	0.444948	0.358875	NULL	1.7576	0.132337	0.607526	0.519021	0.545396	0.108395	0.554822	0.700356	0.185385	-0.979934	-1.2488	-0.724063	-1.40657	no change	no change	no change	down	no change	down	0.376549	NULL	NULL	NULL
Q9RW50	recO	0.0342591	NULL	0.0212514	0.0196798	NULL	NULL	0.085577	0.0855091	0.0192096	0.0523173	NULL	NULL	0.0128178	0.0730818	0.0530964	NULL	0.230171	-4.7777	2.29362	-5.81316	0.264167	-0.412691	no change	down	up	down	no change	no change	0.000386661	1	0	NULL
Q9RW55	DR_0814	7.76191	3.21654	4.47857	5.2728	4.10531	4.41691	5.65197	6.38463	8.10361	5.77474	5.36599	5.61287	7.60457	5.21619	5.66553	4.66897	-0.170997	-0.365373	0.132754	-0.338108	-0.114354	-0.425368	no change	no change	no change	no change	no change	no change	0.111553	NULL	NULL	NULL
Q9RW56	DR_0813	9.86187	8.0174	7.71594	7.26441	5.42538	4.57333	13.5133	7.68812	7.24687	6.44917	8.21987	3.68335	3.39223	3.39766	2.07669	4.92537	-0.255216	-0.838474	0.245875	-0.202407	-1.0123	-0.967908	no change	no change	no change	no change	down	no change	0.0112091	0	0	NULL
Q9RW57	DR_0812	0.0192613	NULL	NULL	NULL	NULL	NULL	NULL	NULL	0.0351942	NULL	NULL	NULL	NULL	NULL	NULL	NULL	-3.96725	-3.96725	-3.96725	-4.81585	-4.81585	-4.81585	down	down	down	down	down	down	0.68312	NULL	NULL	NULL
Q9RW58	DR_0811	0.248844	0.0773805	0.065504	NULL	0.286328	0.0860542	0.0277215	NULL	0.0389719	NULL	0.121987	0.0783086	0.160646	NULL	0.116076	NULL	-2.30227	0.190918	-3.52406	2.33827	2.02573	1.55909	down	no change	down	up	up	up	0.0169827	0	3	late_up
Q9RW59	DR_0810	0.0757812	0.181037	0.132703	0.094332	0.272911	0.284148	0.186538	0.392269	0.244294	0.0395586	0.0415376	0.0709974	0.257527	0.132904	0.406355	0.14408	-0.177835	1.11708	1.17233	-1.33477	0.459927	0.95543	no change	up	up	down	no change	no change	0.691865	NULL	NULL	NULL
Q9RW60	DR_0809	0.973876	0.244981	1.54423	0.795804	0.840879	0.31761	1.4657	0.947007	0.839707	0.20055	0.832913	0.505439	0.468584	0.233032	1.09422	0.42656	0.941	-0.0732831	0.985125	0.363518	-0.568186	0.547868	no change	no change	no change	no change	no change	no change	0.585901	NULL	NULL	NULL
Q9RW61	glmU	0.48993	0.708421	0.786409	0.604277	2.29719	2.50261	0.633335	0.665621	3.58992	2.12727	1.51351	1.08142	1.8845	1.79656	1.0779	0.956756	0.214746	2.00192	0.116301	-1.13962	-0.635188	-1.49052	no change	up	no change	down	no change	down	1.79818e-06	1	0	NULL
Q9RW62	lgt	0.805879	0.929042	0.927455	0.656562	1.01288	1.39028	1.36129	0.92681	1.16175	1.89744	1.48301	1.49	0.387113	1.12872	1.59408	1.38292	-0.131282	0.470067	0.399277	-0.0412272	-1.01304	-0.0392877	no change	no change	no change	no change	down	no change	0.00121522	0	0	NULL
Q9RW63	tatC	3.03037	2.71637	1.58649	1.39382	0.244368	0.259866	10.3935	11.6893	1.62183	2.46088	1.6629	1.39911	3.62796	4.86533	3.48336	2.67009	-0.947285	-3.51058	1.94211	-0.415044	1.0568	0.591868	no change	down	up	no change	up	no change	1.2348e-13	1	1	NULL
Q9RW64	tatA	2.60784	1.07164	3.70145	1.56673	5.86858	4.90343	16.8445	18.6892	1.28722	0.455644	0.862208	0.625157	3.03683	2.38807	3.76763	2.75703	0.517804	1.54971	3.27161	-0.228702	1.63813	1.90444	no change	up	up	no change	up	up	8.31734e-12	2	2	sustain_up
Q9RW65	DR_0804	0.437864	0.105879	0.509873	0.162473	0.0554186	0.119446	1.26302	0.682779	0.227225	0.197086	0.434146	0.213458	0.0933922	0.0333716	0.201864	0.0914296	0.306279	-1.63668	1.83936	0.60999	-1.74298	-0.532774	no change	down	up	no change	down	no change	0.000237896	1	0	NULL
Q9RW66	DR_0803	1.49789	1.56304	3.47791	2.33132	1.20723	1.17474	4.93332	1.85622	NULL	NULL	3.20211	2.60279	3.68543	2.14522	3.84604	1.14025	0.924376	-0.361813	1.14934	12.1558	12.1622	11.9365	no change	no change	up	up	up	up	0.0165713	1	3	NULL
Q9RW67	DR_0802	2.82331	0.905118	0.664771	0.867795	1.6261	1.12782	1.5476	1.85754	1.67871	2.32161	1.68107	1.48074	1.62073	1.28013	1.8241	1.77013	-1.28262	-0.437084	-0.130856	-0.339361	-0.463634	-0.154434	down	no change	no change	no change	no change	no change	0.301471	NULL	NULL	NULL
Q9RW68	DR_0801	0.0323647	NULL	NULL	0.028901	0.0201311	0.0284369	0.0703201	0.0760282	0.00185971	NULL	0.00775803	0.0330682	0.0421707	0.0193087	0.0178103	0.0267675	-0.159975	0.557504	2.14883	4.03194	4.62254	4.15877	no change	no change	up	up	up	up	0.000344541	1	3	NULL
Q9RW69	DR_0800	401.219	180.48	687.131	608.009	530.216	458.912	7.60347	48.8284	210.291	173.196	116.445	301.492	7.03777	1.82876	213.862	249.309	1.15476	0.765883	-3.36569	0.124108	-5.43466	0.272368	up	no change	down	no change	down	no change	2.0943e-08	1	0	NULL
Q9RW70	DR_0799	1.37767	1.78441	3.32818	2.51866	2.9632	2.67423	4.13013	2.81725	2.42762	1.59019	3.19034	3.42326	4.57135	2.7932	5.06809	2.51547	0.886784	0.834166	1.13559	0.719028	0.87419	0.916468	no change	no change	up	no change	no change	no change	0.877286	NULL	NULL	NULL
Q9RW72	DR_0797	NULL	NULL	0.648426	0.889879	2.2717	0.244037	NULL	NULL	2.39465	2.06899	0.163525	NULL	3.34287	NULL	0.125366	1.85136	10.2399	10.9495	0	-4.76504	-0.416859	-1.17511	up	up	no change	down	no change	down	0.0302863	2	0	early_up
Q9RW73	DR_0796	7.45678	0.14231	NULL	NULL	0.287198	0.182195	0.235894	0.0411623	1.12723	10.5474	0.120579	0.0179041	6.29744	6.88699	0.221059	0.0945618	-12.5444	-4.01696	-4.77757	-6.39753	0.175453	-5.20904	down	down	down	down	no change	down	0.0625469	NULL	NULL	NULL
Q9RW74	DR_0795	0.135046	0.168511	NULL	NULL	NULL	0.0445876	NULL	NULL	0.221366	0.0991108	NULL	0.0121949	0.0375146	NULL	NULL	0.0106797	-7.89856	-2.74681	-7.89856	-4.64252	-3.07044	-4.82381	down	down	down	down	down	down	0.977411	NULL	NULL	NULL
Q9RW75	lysJ	6.58616	8.47754	7.05992	6.06566	5.89749	8.20482	6.67384	7.40723	11.5024	8.37839	8.72254	10.1523	10.2236	9.74185	6.32365	15.3307	-0.198695	-0.0951446	-0.0973196	-0.0749143	0.00612523	0.123279	no change	no change	no change	no change	no change	no change	0.92639	NULL	NULL	NULL
Q9RW76	DR_0793	1.73057	0.973153	1.00159	0.49431	0.645157	0.421055	1.98651	1.58292	1.05281	0.567775	0.383587	0.302577	0.430159	0.300196	1.23858	0.279652	-0.853937	-1.34245	0.400748	-1.23989	-1.14985	-0.0941197	no change	down	no change	down	down	no change	0.0718679	NULL	NULL	NULL
Q9RW77	DR_0792	3.98003	0.308931	NULL	NULL	2.09785	0.0399611	4.91718	0.102892	NULL	0.174103	4.06051	0.0687605	0.172248	0.0540042	6.85918	0.0488879	-11.7192	-1.0045	0.22708	4.56262	0.372733	5.30501	down	down	no change	up	no change	up	0.229724	NULL	NULL	NULL
Q9RW78	DR_0791	NULL	0.0155699	NULL	NULL	0.111213	0.0448887	0.0378479	0.0607922	NULL	NULL	NULL	NULL	0.0517827	NULL	0.0815478	0.102002	-3.6712	3.26789	2.60565	0	5.36475	7.17277	down	up	up	no change	up	up	0.00114054	2	2	sustain_up
Q9RW79	DR_0790	0.790622	0.874873	1.69178	2.68657	2.57948	1.82346	0.590369	0.339448	0.929702	0.967254	1.47024	1.27991	0.701794	0.7496	1.2179	0.970343	1.39443	1.40251	-0.840932	0.535829	-0.386246	0.206088	up	up	no change	no change	no change	no change	3.19032e-06	2	0	early_up
Q9RW80	DR_0789	18.763	15.4272	7.83403	9.91976	6.31038	7.35404	3.02425	2.8672	10.7211	12.2823	4.06211	4.61474	6.81984	9.49289	2.05222	5.12428	-0.945455	-1.32316	-2.53689	-1.4066	-0.495844	-1.68049	no change	down	down	down	no change	down	3.54462e-05	0	0	NULL
Q9RW81	DR_0788	13.117	11.0086	11.1535	15.3537	5.72768	2.62455	3.50071	2.09236	6.9499	11.7187	4.39148	4.17325	3.71067	3.0213	2.16134	2.86488	0.135821	-1.53033	-2.10885	-1.12414	-1.47152	-1.89307	no change	down	down	down	down	down	0.000130068	0	0	NULL
Q9RW82	DR_0787	0.30971	0.313288	1.089	0.937505	1.64199	0.827642	0.57811	0.851905	0.126376	0.314702	1.11742	0.902896	0.609889	0.566097	1.18005	0.866479	1.70169	1.98699	1.19873	2.19548	1.41477	2.21408	up	up	up	up	up	up	0.00169656	3	3	sustain_up
Q9RW83	DR_0786	NULL	NULL	NULL	NULL	NULL	NULL	NULL	0.0692877	NULL	NULL	0.106976	0.0554699	NULL	0.020004	0.0986163	0.0491034	0	0	5.78046	6.99656	4.02012	6.85946	no change	no change	up	up	up	up	0.00549116	1	3	NULL
Q9RW85	DR_0784	NULL	NULL	NULL	NULL	0.0230572	0.0280877	0.0597479	0.058096	0.00104492	NULL	NULL	NULL	0.0767015	0.0344557	0.0413638	0.0368292	0	5.32926	6.53348	-0.402057	6.04715	5.53966	no change	up	up	no change	up	up	0.000352984	2	2	sustain_up
Q9RW87	DR_0782	3.51521	4.71563	7.27914	6.56857	2.83493	3.72439	0.531109	0.226923	6.07005	4.76406	4.92096	8.25801	1.85599	1.62852	4.08225	5.49858	0.750536	-0.327494	-3.44071	0.282657	-1.63655	-0.177358	no change	no change	down	no change	down	no change	2.22248e-05	0	0	NULL
Q9RW88	DR_0781	4.15981	2.59648	2.3472	2.44902	12.3794	12.8993	8.81749	14.7424	5.58364	4.88976	6.65186	6.10351	11.0288	13.1218	12.1945	10.761	-0.494331	1.90362	1.80203	0.284374	1.20533	1.13211	no change	up	up	no change	up	up	0.0142985	2	2	sustain_up
Q9RW89	DR_0780	1.2697	1.24638	12.6066	7.56349	9.75384	7.70948	1.02855	0.786362	0.982966	3.19216	9.09513	11.8082	4.15465	3.01083	3.35227	3.38701	3.00297	2.79508	-0.471273	2.32384	0.779244	0.690775	up	up	no change	up	no change	no change	0.000213019	2	1	NULL
Q9RW90	DR_0779	0.196366	NULL	NULL	NULL	NULL	0.00682566	0.188871	NULL	0.24245	0.0629183	0.0179413	0.0147823	0.034835	0.0167595	0.113437	0.0308084	-7.27481	-4.72255	-0.0559595	-3.22215	-2.56526	-1.08203	down	down	no change	down	down	down	0.739478	NULL	NULL	NULL
Q9RW91	aroQ	2.71322	4.55855	3.32435	6.14693	0.608583	2.04274	3.07794	7.02387	3.43671	6.80513	1.62873	2.49689	1.02454	1.52542	1.57335	1.10853	0.381251	-1.45559	0.474234	-1.31179	-2.00593	-1.93316	no change	down	no change	down	down	down	0.00428157	0	0	NULL
Q9RW92	aroB	1.08839	0.568524	1.47021	0.412315	1.1063	0.321381	0.383878	0.320168	0.42129	0.296518	0.473486	0.35655	0.356599	0.299828	0.512539	0.447333	0.184169	-0.214827	-1.23475	0.209575	-0.128965	0.419242	no change	no change	down	no change	no change	no change	0.139357	NULL	NULL	NULL
Q9RW93	aroK	0.548228	0.0257052	NULL	0.0543887	0.883403	0.611699	0.47208	0.279778	0.425039	0.577017	0.112118	0.643603	0.417966	0.802749	0.772825	0.560604	-3.38273	1.38129	0.389578	-0.407036	0.284764	0.412178	down	up	no change	no change	no change	no change	0.0893509	NULL	NULL	NULL
Q9RW94	aroC	1.91099	1.87705	2.85393	2.85241	2.89808	3.64754	3.79367	5.01789	2.33787	2.07606	2.60776	2.40533	7.03845	6.8714	2.4861	3.04801	0.591112	0.789077	1.21795	0.183634	1.65597	0.326287	no change	no change	up	no change	up	no change	1.60317e-10	1	1	NULL
Q9RW95	DR_0774	0.919212	0.625916	0.372616	0.510423	0.896118	0.870272	1.5044	2.35938	0.586955	0.624055	0.552327	0.632756	1.61487	1.60378	1.84832	1.59666	-0.807176	0.193078	1.32229	-0.0312221	1.41024	1.50829	no change	no change	up	no change	up	up	0.000640428	1	2	NULL
Q9RW96	DR_0773	0.334009	0.154279	0.0225262	0.0607626	1.4059	2.07733	0.719381	0.804598	0.155324	0.163397	1.63705	1.46898	0.809294	0.537964	0.684582	0.996603	-2.55154	2.83462	1.64204	3.28471	2.07966	2.39911	down	up	up	up	up	up	8.71006e-10	2	3	sustain_up
Q9RW97	DR_0772	NULL	2.69999	0.208884	1.20574	1.56558	1.36139	1.87049	1.83764	0.305874	0.325444	0.23118	0.762433	0.652461	1.46935	0.880951	1.12905	-0.932876	0.116112	0.457396	0.654318	1.74886	1.67075	no change	no change	no change	no change	up	up	0.536327	NULL	NULL	NULL
Q9RW98	DR_0771	NULL	NULL	NULL	NULL	NULL	NULL	0.0733869	0.142365	NULL	NULL	NULL	0.0656473	0.0529523	0.0745364	0.0817081	0.0733024	0	0	7.40597	5.70332	6.64697	6.92897	no change	no change	up	up	up	up	0.00156134	1	3	NULL
Q9RW99	DR_0770	0.897358	0.166941	2.55516	0.889658	3.1754	2.52669	1.92652	1.35502	0.742827	0.392579	1.71697	0.787866	1.40172	0.818414	1.8685	1.32792	1.69452	2.42159	1.62447	1.14151	0.967436	1.49325	up	up	up	up	no change	up	0.00745008	3	2	sustain_up
Q9RWA0	DR_0769	1.96	2.44885	2.44686	3.18888	2.44862	2.59484	2.15941	3.91338	2.8681	2.43588	1.9675	4.11233	3.30028	1.31953	3.03911	2.46138	0.354202	0.19401	0.461954	0.196957	-0.199241	0.0524841	no change	no change	no change	no change	no change	no change	0.716364	NULL	NULL	NULL
Q9RWA1	DR_0768	1.59503	1.82267	2.59676	2.82194	2.62102	2.98432	2.71792	5.74391	1.13477	2.23962	1.93973	2.94199	6.55256	6.1501	3.58629	2.75432	0.66492	0.713775	1.30794	0.532766	1.91243	0.909997	no change	no change	up	no change	up	no change	4.26076e-05	1	1	NULL
Q9RWA3	DR_0766	15.0384	20.2977	NULL	9.15201	0.434277	7.12308	0.0718189	NULL	0.0215406	0.0268093	0.360792	0.246655	0.117358	0.0297834	0.164154	0.120097	-1.94888	-2.22519	-8.92984	3.65117	1.60562	2.55558	down	down	down	up	up	up	1.88091e-05	0	3	late_up
Q9RWA4	lipA	3.07802	2.60001	2.21343	1.95002	1.69279	2.11559	2.82603	3.79636	3.17899	2.49145	3.28371	2.65182	2.73821	1.73605	3.03911	2.67195	-0.447614	-0.576214	0.22196	0.0659162	-0.341808	0.0102984	no change	no change	no change	no change	no change	no change	0.0183019	0	0	NULL
Q9RWA5	lipB	2.08088	1.42575	2.73502	2.65948	2.41401	1.43266	2.24768	2.30173	2.13009	1.9048	1.82039	2.38063	2.43509	3.125	1.49203	2.02247	0.621407	0.133528	0.375599	0.0582107	0.46258	-0.199211	no change	no change	no change	no change	no change	no change	0.000974559	0	0	NULL
Q9RWA6	DR_0763	0.724295	1.33474	0.736661	0.53233	0.275642	0.364236	0.803082	1.76357	3.27908	0.826126	1.00672	0.691221	2.32872	2.12232	0.59867	0.572231	-0.698286	-1.6861	0.317919	-1.27367	0.116689	-1.80984	no change	down	no change	down	no change	down	0.00183598	0	0	NULL
Q9RWA7	DR_0762	17.4058	43.4588	89.52	17.2978	18.7066	21.2881	0.468237	1.44095	19.098	21.9112	44.5552	10.1774	38.815	12.7857	8.39366	3.37394	0.811475	-0.605796	-4.99457	0.41645	0.331442	-1.80113	no change	no change	down	no change	no change	down	0.282962	NULL	NULL	NULL
Q9RWA8	DR_0761	0.219668	0.164202	0.180248	0.0435223	0.150664	0.151204	0.0586718	0.0424874	0.0718557	0.0541185	0.0869932	0.0499899	0.0294826	0.0275811	0.091416	0.0795114	-0.778599	-0.346699	-1.92399	0.12087	-1.14248	0.440256	no change	no change	down	no change	down	no change	0.000233344	0	0	NULL
Q9RWA9	DR_0760	NULL	NULL	NULL	NULL	0.0202377	NULL	NULL	0.032028	0.00905934	NULL	0.0147709	NULL	0.019675	NULL	0.0108647	NULL	0	4.03637	4.68238	0.668207	1.06689	0.246357	no change	up	up	no change	up	no change	0.284139	NULL	NULL	NULL
Q9RWB0	DR_0759	0.242836	1.35241	0.143801	1.15605	0.620344	0.636557	0.132785	0.109554	0.873524	1.88694	0.571697	0.377907	1.52502	1.98821	0.47996	0.310736	-0.295427	-0.343907	-2.71868	-1.53951	0.347886	-1.80372	no change	no change	down	down	no change	down	0.0258223	0	0	NULL
Q9RWB1	DR_0758	2.15781	2.54421	2.35535	1.96356	1.8347	1.97657	2.64728	2.24178	3.22712	3.1943	2.2677	1.60656	2.3916	1.3537	1.77285	1.45994	-0.122613	-0.303006	0.0562772	-0.728974	-0.777813	-0.990114	no change	no change	no change	no change	no change	no change	0.000339651	0	0	NULL
Q9RWB2	gltA	122.77	102.467	68.2867	97.5709	46.1616	78.8463	59.1983	66.3562	96.9449	77.5631	58.0982	117.53	64.5655	77.3697	58.289	65.6041	-0.441499	-0.849424	-0.843129	0.00923359	-0.298061	-0.494197	no change	no change	no change	no change	no change	no change	0.204077	NULL	NULL	NULL
Q9RWB3	DR_0756	0.0517521	NULL	NULL	NULL	0.337665	0.509694	NULL	0.250002	NULL	0.0406792	NULL	0.144379	0.566326	0.803509	NULL	0.399582	-5.36391	4.01566	2.25829	1.81145	5.05118	3.27604	down	up	up	up	up	up	0.176717	NULL	NULL	NULL
Q9RWB4	rplS	38.482	23.4439	40.5456	43.6953	13.9919	12.3944	9.46389	1.70974	27.4087	30.0411	12.657	16.9046	11.8219	12.47	5.47836	10.3136	0.443977	-1.23075	-2.47044	-0.958579	-1.24183	-1.86311	no change	down	down	no change	down	down	2.33134e-06	0	0	NULL
Q9RWB6	DR_0753	19.9741	29.3129	27.9729	22.6073	27.2229	17.2255	36.037	36.1846	11.5843	11.9801	16.964	17.9654	14.6286	16.5793	18.5519	23.0738	0.0373667	-0.149073	0.551226	0.567827	0.405296	0.820861	no change	no change	no change	no change	no change	no change	0.04503	0	0	NULL
Q9RWB7	DR_0752	14.7722	16.5017	23.6163	15.3147	35.9924	33.756	47.5424	46.4694	13.9465	17.8217	24.2994	20.7654	28.8943	34.9285	33.1658	36.679	0.31596	1.1572	1.58788	0.50442	1.00649	1.13657	no change	up	up	no change	up	up	0.000121302	2	2	sustain_up
Q9RWB8	minE	NULL	NULL	NULL	NULL	3.60429	1.39715	0.443065	0.350571	NULL	NULL	3.51699	0.665053	1.91423	1.37712	3.12432	1.7243	0	11.9409	9.28508	11.6827	11.3372	11.8961	no change	up	up	up	up	up	0.00348189	2	3	sustain_up
Q9RWB9	DR_0750	0.0578729	NULL	0.0276766	NULL	0.0105426	0.0364912	0.0734023	0.170572	0.0326933	0.0572831	0.0627726	0.0195465	0.0309677	0.0255567	0.0779793	0.0149375	-1.04721	-0.314963	2.06	-0.12832	-0.670674	0.0463903	down	no change	up	no change	no change	no change	0.0118829	1	0	NULL
Q9RWC1	DR_0748	0.176674	0.142167	0.288667	0.252963	5.49892	2.65304	0.317843	0.110496	0.432747	0.0336093	2.09209	1.91665	4.86365	3.04959	1.58165	0.84832	0.764473	4.67624	0.425918	3.10364	4.08476	2.38143	no change	up	no change	up	up	up	0.0660952	NULL	NULL	NULL
Q9RWC2	DR_0747	15.3925	23.5465	9.9415	11.0357	2.6222	6.88882	5.64967	7.14643	20.909	21.1763	8.17425	8.39467	9.5736	14.4321	5.62329	6.34223	-0.892393	-2.03354	-1.60551	-1.34484	-0.809936	-1.81443	no change	down	down	down	no change	down	0.00286627	0	0	NULL
Q9RWC4	DR_0745	0.566778	0.0223272	NULL	0.0272197	0.0179653	0.0392083	0.014056	0.0527918	0.546857	NULL	NULL	0.113945	0.0547169	0.0446052	0.0166256	0.0687625	-4.40247	-3.3651	-3.13957	-2.25647	-2.46265	-2.68073	down	down	down	down	down	down	0.982101	NULL	NULL	NULL
Q9RWC5	DR_0744	0.665744	1.21518	0.597693	0.651417	0.730513	0.311816	2.27005	1.16932	0.22636	0.334486	0.851923	0.405706	0.623997	0.680587	0.915277	0.569814	-0.590544	-0.851633	0.870701	1.16503	1.21791	1.40487	no change	no change	no change	up	up	up	0.00394941	0	3	late_up
Q9RWC6	DR_0743	50.081	67.698	43.7076	29.7019	57.855	53.2973	81.8723	98.8823	34.5586	33.9756	40.1009	43.2848	50.5679	36.6089	59.3572	40.7453	-0.682043	-0.0835433	0.617951	0.282975	0.34712	0.546582	no change	no change	no change	no change	no change	no change	0.000151066	0	0	NULL
Q9RWC7	argR	0.102612	NULL	0.411141	0.47272	1.29626	1.83326	1.57377	3.19834	2.05201	0.0918473	0.237864	0.434687	4.23285	4.10846	2.1745	2.73247	3.0977	4.92175	5.53043	-1.67249	1.96007	1.19462	up	up	up	down	up	up	0.000496308	3	2	sustain_up
Q9RWC9	DR_0740	1.13174	1.00048	0.714848	1.46051	1.08746	0.244173	1.67615	0.352375	0.315291	0.218705	1.22688	0.287636	1.52596	1.23198	0.428932	0.553712	0.0288974	-0.679156	-0.0719256	1.50395	2.36869	0.879841	no change	no change	no change	up	up	no change	0.0107024	0	2	late_up
Q9RWD0	DR_0739	0.0245186	NULL	NULL	NULL	0.0309821	0.0103161	0.00393528	NULL	NULL	NULL	0.0258322	0.0463067	0.0216652	0.0222782	0.0971743	0.0361662	-4.3055	0.715255	-2.46013	5.82545	5.11032	6.71171	down	no change	down	up	up	up	0.000367864	0	3	late_up
Q9RWD1	DR_0738	NULL	NULL	NULL	NULL	NULL	0.0390468	NULL	NULL	NULL	NULL	NULL	NULL	0.120445	0.130938	NULL	NULL	0	4.96319	0	0	7.62649	0	no change	up	no change	no change	up	no change	4.38704e-10	1	1	NULL
Q9RWD2	DR_0737	NULL	NULL	0.0410507	0.0586581	0.0679906	NULL	NULL	0.0402235	NULL	0.034552	0.0803538	0.0337656	0.0413729	0.0823889	0.124167	0.113989	6.29239	5.75344	5.00535	1.69738	1.81441	2.75875	up	up	up	up	up	up	0.00276101	3	3	sustain_up
Q9RWD5	DR_0734	NULL	NULL	NULL	NULL	NULL	NULL	NULL	NULL	NULL	NULL	NULL	NULL	0.107412	0.135666	NULL	NULL	0	0	0	0	7.57802	0	no change	no change	no change	no change	up	no change	3.44124e-13	0	1	NULL
Q9RWD6	hisI	NULL	NULL	1.00825	0.874273	4.33716	4.52119	0.156262	NULL	0.649415	0.273092	2.71829	3.10458	1.18789	1.42935	1.0411	2.98586	10.5312	12.7656	6.94643	2.6581	1.50441	2.12606	up	up	up	up	up	up	3.38201e-09	3	3	sustain_up
Q9RWD7	hisF	0.047455	0.0574213	0.356117	0.243077	0.655739	0.372108	NULL	0.15738	NULL	0.0912474	0.199672	0.283518	0.017662	0.16497	0.394096	0.191763	2.51433	3.29286	0.591384	2.39471	0.99106	2.67268	up	up	no change	up	no change	up	3.0263e-05	2	2	sustain_up
Q9RWD9	DR_0730	0.0836804	NULL	NULL	NULL	0.165655	0.438606	0.232293	NULL	0.203377	0.131107	0.0560652	0.106806	0.307221	0.303473	0.36596	0.0838456	-6.05049	2.84129	1.46601	-1.03821	0.868511	0.427365	down	up	up	down	no change	no change	0.608018	NULL	NULL	NULL
Q9RWE0	DR_0729	NULL	NULL	0.0420867	0.00896651	0.381256	0.191342	0.156258	0.0296554	NULL	NULL	0.211638	0.0762801	0.0857568	NULL	0.129605	0.104403	5.32667	8.81412	7.19123	7.82226	6.08558	7.52315	up	up	up	up	up	up	8.49016e-05	3	3	sustain_up
Q9RWE1	DR_0728	2.7941	0.281017	1.34933	1.35974	2.46897	1.74334	0.298763	0.21205	0.997689	0.090926	1.02673	0.716654	1.23724	0.832521	1.57716	0.827579	-0.182844	0.45397	-2.58978	0.6794	0.926974	1.14339	no change	no change	down	no change	no change	up	0.012889	0	1	NULL
Q9RWE2	DR_0727	0.779902	0.698362	0.262935	0.19074	0.895248	0.681942	0.432804	0.52782	1.73117	1.40078	0.78897	NULL	1.55679	1.5609	0.444032	0.351602	-1.70417	0.0934526	-0.621859	-1.98785	-0.00658077	-1.97688	down	no change	no change	down	no change	down	0.000227799	0	0	NULL
Q9RWE5	DR_0724	0.0901894	0.077367	0.0592007	0.0294958	0.0954108	0.113549	0.190769	0.1544	0.112542	0.121966	0.0428063	0.057681	0.0694267	0.0846827	0.0386085	0.0980011	-0.917697	0.318581	1.04266	-1.22262	-0.60568	-0.779576	no change	no change	up	down	no change	no change	2.67597e-06	1	0	NULL
Q9RWE6	DR_0723	0.837805	1.27758	0.345413	1.05639	0.169318	0.90611	0.47673	0.809648	0.65866	0.88262	0.550286	0.626689	0.610723	1.25344	0.511762	0.896724	-0.593639	-0.976008	-0.717604	-0.389045	0.274396	-0.129984	no change	no change	no change	no change	no change	no change	0.1461	NULL	NULL	NULL
Q9RWE9	DR_0720	NULL	NULL	NULL	NULL	0.0613832	NULL	NULL	NULL	NULL	NULL	NULL	NULL	0.0485802	NULL	0.050494	0.0472123	0	5.60739	0	0	5.27381	6.26312	no change	up	no change	no change	up	up	0.0111725	1	2	NULL
Q9RWF0	DR_0719	0.859836	0.774825	1.02969	0.728804	1.78421	1.06859	1.35621	2.7017	0.448088	1.07896	0.964782	0.759614	0.894393	1.53345	1.79722	1.25061	0.105345	0.803387	1.31175	0.175349	0.668932	0.997043	no change	no change	up	no change	no change	no change	0.586303	NULL	NULL	NULL
Q9RWF2	DR_0717	5.11301	3.05091	4.12306	4.09665	1.69877	1.29775	1.1762	1.55321	4.03517	3.88873	2.31036	2.71261	1.66776	2.02406	1.74991	1.12104	0.00982606	-1.44597	-1.58067	-0.65767	-1.10188	-1.46468	no change	down	down	no change	down	down	0.00338485	0	0	NULL
Q9RWF3	DR_0716	1.15301	1.11718	0.558933	0.128701	12.3999	7.45245	6.03436	2.80327	11.3793	1.328	3.83912	0.544881	2.61359	1.49061	8.01277	2.0178	-1.7231	3.12843	1.96085	-1.53534	-1.63049	-0.341257	down	up	up	down	down	no change	0.00167788	2	0	early_up
Q9RWF4	DR_0715	NULL	NULL	NULL	NULL	0.210627	0.26551	NULL	NULL	0.843324	NULL	0.102565	0.0770216	1.88254	0.0802749	NULL	NULL	0	8.54798	0	-2.23249	1.21768	-9.37378	no change	up	no change	down	up	down	0.280861	NULL	NULL	NULL
Q9RWF5	DR_0714	NULL	0.108346	0.134633	0.108318	0.3078	0.0456892	0.227086	0.387965	0.253299	0.0474013	0.0588466	0.185831	0.0258992	0.0665042	0.251548	0.578763	1.15657	1.69757	2.49661	-0.297443	-1.70231	1.46533	up	up	up	no change	down	up	0.136957	NULL	NULL	NULL
Q9RWF6	DR_0712	0.267941	0.101468	0.10375	0.0752816	0.337216	0.0119307	0.130483	0.114285	NULL	0.186959	NULL	0.0298446	0.0949675	0.0975983	0.104882	0.0841428	-1.045	-0.0813854	-0.593804	-2.62165	0.0377335	0.0109563	down	no change	no change	down	no change	no change	0.885893	NULL	NULL	NULL
Q9RWF7	DR_0711	13.2206	13.5798	11.5488	10.6654	9.77685	12.0966	4.97521	5.00662	13.0184	10.451	9.38688	10.9539	11.2506	8.77797	6.11512	5.88627	-0.270775	-0.293074	-1.42488	-0.206411	-0.228728	-0.967584	no change	no change	down	no change	no change	no change	0.0653513	NULL	NULL	NULL
Q9RWF8	DR_0710	0.0480005	0.0188282	0.0589165	NULL	0.425857	0.014429	0.900158	0.664591	0.0717552	NULL	0.104895	0.0388901	0.316957	0.214414	0.21099	0.0664076	-0.166305	2.7199	4.54932	0.990023	2.87583	1.93807	no change	up	up	no change	up	up	1.07017e-05	2	2	sustain_up
Q9RWF9	DR_0709	0.697906	0.193462	0.63454	0.484932	0.612625	0.523794	0.182898	0.190009	1.79529	0.752634	0.779005	0.296982	0.566844	0.501559	0.773748	0.355227	0.328726	0.350403	-1.2572	-1.24366	-1.25386	-1.17431	no change	no change	down	down	down	down	0.01822	0	0	NULL
Q9RWG0	DR_0708	0.0110659	NULL	NULL	NULL	NULL	NULL	0.00533377	NULL	0.0117979	0.039535	0.00983832	NULL	NULL	0.0664322	NULL	0.0215135	-3.20142	-3.20142	-0.970986	-2.29302	0.385746	-1.2126	down	down	no change	down	no change	down	0.28474	NULL	NULL	NULL
Q9RWG3	DR_0705	0.0603069	NULL	NULL	NULL	0.0150203	NULL	NULL	NULL	0.0961208	0.00317523	NULL	0.00984219	0.0486839	NULL	0.0425242	0.072659	-5.58213	-1.96071	-5.58213	-3.24434	-1.00957	0.214122	down	down	down	down	down	no change	0.238023	NULL	NULL	NULL
Q9RWG5	DR_0703	NULL	NULL	NULL	0.55258	NULL	NULL	NULL	NULL	NULL	NULL	NULL	0.252704	0.232196	0.63575	0.119409	NULL	8.76444	0	0	7.63768	9.4142	6.56017	up	no change	no change	up	up	up	0.00918303	1	3	NULL
Q9RWG6	atpD	1.00692	0.316278	2.61519	2.09518	5.02231	7.38929	1.08689	2.3009	1.43556	NULL	3.77308	4.82696	1.63335	0.949928	4.36118	3.96936	1.83181	3.22959	1.35631	2.5821	0.846954	2.53616	up	up	up	up	no change	up	3.79809e-08	3	2	sustain_up
Q9RWG7	atpB	18.0279	13.4337	16.3399	10.251	17.567	19.2825	30.5442	40.2231	9.6568	7.71632	17.5931	15.1451	22.859	19.3266	29.806	18.3689	-0.242655	0.228056	1.16949	0.91412	1.2799	1.47143	no change	no change	up	no change	up	up	0.0017459	1	2	NULL
Q9RWG8	atpA	31.2673	31.2023	38.519	41.1748	51.0933	43.196	62.7378	62.3854	25.254	28.332	41.4415	42.4912	26.0435	28.1957	38.356	42.8455	0.351312	0.593938	1.00212	0.647378	0.0174801	0.599651	no change	no change	up	no change	no change	no change	4.1603e-09	1	0	NULL
Q9RWG9	DR_0699	NULL	NULL	NULL	NULL	0.022195	2.56059	0.847123	NULL	NULL	NULL	0.652259	2.96688	0.0210549	NULL	0.406428	1.98204	0	10.9875	9.38026	11.4742	4.09177	10.8746	no change	up	up	up	up	up	0.00912619	2	3	sustain_up
Q9RWH0	atpC	14.5242	15.2742	15.7555	19.3795	15.1927	13.594	13.3754	13.5021	9.10155	14.0871	10.9657	16.7703	12.7447	20.1902	11.7008	16.0917	0.237671	-0.0498331	-0.148839	0.258345	0.506203	0.261278	no change	no change	no change	no change	no change	no change	0.0896451	NULL	NULL	NULL
Q9RWH1	atpE	0.375148	0.311276	1.07402	1.40662	16.7875	13.1541	1.57684	1.12153	0.208854	0.612242	6.25245	18.0984	3.71743	2.34855	4.60102	11.2225	1.85354	5.44691	1.97492	4.89028	2.88512	4.26838	up	up	up	up	up	up	3.84103e-06	3	3	sustain_up
Q9RWH2	DR_0696	49.4701	42.6473	93.489	110.534	35.678	34.6453	36.2473	62.4933	20.3553	31.9159	79.9216	97.6681	28.4346	32.8996	54.3806	70.4217	1.14718	-0.389472	0.100167	1.76446	0.230678	1.25556	up	no change	no change	up	no change	up	0.00821434	1	2	NULL
Q9RWH3	atpI	22.4328	12.1444	22.693	16.9481	18.2673	15.477	15.3249	10.025	12.2135	10.1189	17.2978	14.1774	12.7053	9.80259	18.9248	15.6093	0.197178	-0.0351745	-0.447837	0.49508	0.0112949	0.628886	no change	no change	no change	no change	no change	no change	0.00709509	0	0	NULL
Q9RWH4	DR_0694	0.635643	0.412533	20.7413	12.3887	25.3238	12.1785	16.2342	12.4923	1.15125	1.56212	41.5296	37.7926	11.5517	5.72211	30.2187	25.9588	4.98218	5.16103	4.77643	4.86957	2.67043	4.37184	up	up	up	up	up	up	6.05156e-07	3	3	sustain_up
Q9RWH6	DR_0692	2.08535	0.223292	0.0823092	0.391873	0.0691695	0.80036	1.52554	2.06275	3.9495	1.46299	1.31188	0.231408	0.902326	0.935062	2.29932	2.86615	-2.28353	-1.40874	0.636248	-1.81028	-1.55864	-0.0673903	down	down	no change	down	down	no change	0.43202	NULL	NULL	NULL
Q9RWH7	DR_0691	3.36277	3.96296	3.95189	5.935	4.98807	3.82096	5.92867	10.0549	2.84177	4.67914	3.24497	4.59617	4.77576	5.18862	2.2572	7.04576	0.432546	0.266012	1.12555	0.060156	0.405873	0.306783	no change	no change	up	no change	no change	no change	0.0690118	NULL	NULL	NULL
Q9RWH8	DR_0690	0.62616	0.570128	0.207741	0.459823	0.413479	2.20331	0.39764	0.450738	0.613839	1.08581	0.362785	0.507045	0.509195	0.505115	1.01165	0.591501	-0.841586	1.12923	-0.495786	-0.966434	-0.74474	-0.0843254	no change	up	no change	no change	no change	no change	0.033594	1	0	NULL
Q9RWH9	ung	0.902424	1.13655	1.25372	0.903423	0.483201	0.620107	1.64075	0.479788	0.868198	2.70171	0.613719	0.58251	0.544735	1.1246	0.68582	1.38384	0.0812796	-0.886005	0.0565912	-1.57739	-1.09661	-0.786494	no change	no change	no change	down	down	no change	0.116206	NULL	NULL	NULL
Q9RWI2	DR_0686	1.35381	0.822946	0.77061	0.791388	0.645466	0.681134	1.15799	1.13368	1.51982	1.26679	0.61528	0.381088	1.07807	0.992447	1.17389	1.27103	-0.478789	-0.714448	0.0742186	-1.48376	-0.428525	-0.18873	no change	no change	no change	down	no change	no change	0.000600564	0	0	NULL
Q9RWI3	DR_0685	5.95411	6.29464	9.5632	8.62348	20.773	24.6681	6.56162	11.0937	6.05447	6.90197	6.58663	10.1541	2.81011	3.57685	15.5109	22.8915	0.570248	1.89136	0.527467	0.369695	-1.02047	1.56753	no change	up	no change	no change	down	up	1.83629e-09	1	1	NULL
[truncated: 841 more rows]

## Sheet: Table S1B
Table S1B Phosphoproteome identification and differential expression in D. radiodurans.
[truncated: 1,111 more rows]

## Sheet: Table S1C
Table S1C Comparison of the identification between the proteome and the phosphoproteome at each radiation states.
[truncated: 4 more rows]

[truncated: 5 more sheets: Table S1D, Table S2, Table S3A, Table S3B, Table S4]
